# Supplementary material
Source: Research Square preprint supplement (doi:10.21203/rs.3.rs-8864095/v1)
Supplement: Supplementary file 1 [file 54a5453bc37f9a4e315691a3.xlsx]

## Sheet: all_quantified_genes
locustag	gene	log2fc	pval	padj	NB_A_CPM	NB_B_CPM	NB_C_CPM	DB_A_CPM	DB_B_CPM	DB_C_CPM
GSU0000.1	dnaA	-0.25166	0.0927744	0.49961	238.951	203.227	176.938	175.524	184.229	160.208
GSU0001	dnaN	-0.263675	0.102801	0.49961	570.044	432.926	422.576	403.752	432.543	351.075
GSU0002	recF	-0.201326	0.195309	0.529809	320.034	270.07	262.862	270.136	268.317	203.378
GSU0003	gyrB	-0.113556	0.287004	0.584761	1144.24	1142.05	1166.25	1128.64	1136.97	925.597
GSU0004	gyrA	-0.0344269	0.77061	0.892341	1202.19	1317.94	1298.83	1328.74	1350.32	1049.85
GSU0005		0.00376329	0.972698	0.990021	367.216	432.652	430.014	425.73	435.82	371.571
GSU0006	gpsA	0.147413	0.32791	0.610554	150.479	195.455	204.108	217.346	210.199	181.729
GSU0007		-0.0777907	0.539333	0.757816	147.195	126.234	129.76	136.092	134.894	111.019
GSU0008		0.192792	0.11496	0.49961	129.762	157.872	154.344	171.001	172.967	161.233
GSU0009	fgrK	0.027057	0.781607	0.898353	101.656	100.722	108.438	103.36	107.117	106.236
GSU0010	fgrL	0.0878456	0.376296	0.642792	277.826	315.699	312.785	327.491	332.276	303.465
GSU0011		0.10093	0.483094	0.720818	41.9661	51.4811	54.2192	51.1679	55.0921	52.1361
GSU0012	hemY	0.149967	0.270419	0.578219	250.106	315.836	331.123	319.383	358.624	317.385
GSU0013		-0.352834	0.0552553	0.49961	28.8789	23.7289	24.146	18.6065	22.9025	18.5743
GSU0014		-0.0679827	0.68355	0.843061	65.4362	54.0872	45.7462	47.6685	55.5964	54.3564
GSU0015		-0.15582	0.150533	0.505121	688.94	605.475	627.718	546.075	544.702	634.557
GSU0016		-0.208843	0.100943	0.49961	465.684	364.574	376.551	345.031	343.286	355.815
GSU0017	mfd	0.0449587	0.718108	0.861979	503.835	623.672	645.459	621.824	656.147	551.165
GSU0018		0.0362592	0.847924	0.932855	185.153	273.545	299.499	262.113	283.865	231.602
GSU0019		0.105711	0.515866	0.74433	7.0024	8.36683	7.35917	7.89496	8.2365	8.3264
GSU0020	yrdA	-0.0179105	0.872759	0.944765	172.018	189.008	200.289	185.724	200.113	168.578
GSU0021	nadA	-0.0673639	0.57627	0.783294	330.948	325.438	343.017	341.532	343.79	268.494
GSU0022	tatB	-0.00593875	0.95981	0.98463	136.571	143.013	170.733	145.865	156.956	145.691
GSU0023		0.0463376	0.667752	0.833359	550.485	589.793	606.118	624.385	654.256	524.777
GSU0024		-0.0558186	0.566741	0.776249	952.52	805.822	799.445	797.092	834.66	828.925
GSU0025		0.0372448	0.626778	0.812258	465.732	460.541	455.036	466.699	473.179	477.551
GSU0026		0.0378227	0.663107	0.829577	389.816	418.159	432.879	410.026	424.264	439.549
GSU0027		-0.108622	0.212046	0.544423	482.828	461.044	450.143	420.396	422.961	449.54
GSU0028		0.169451	0.187696	0.525222	597.571	774.32	775.14	815.443	835.123	764.107
GSU0029		0.0407821	0.648747	0.822927	159.8	165.599	170.892	171.214	170.571	168.748
GSU0030	hemN	0.12752	0.34407	0.620926	34.1427	39.0452	39.7793	40.5417	39.5436	43.34
GSU0031	hrcA	-0.216039	0.103007	0.49961	95.7639	101.454	95.9875	87.8261	90.8537	73.742
GSU0032	grpE	-0.216475	0.086538	0.49961	98.1785	107.809	101.716	90.2159	94.6778	79.9334
GSU0033	dnaK	-0.30162	0.0187169	0.49961	796.873	975.581	797.217	675.979	704.473	704.413
GSU0034	dnaJ	-0.401775	0.0045302	0.49961	107.016	106.666	96.7035	78.6509	80.1799	76.0905
GSU0035		0.161257	0.289437	0.585822	38.8271	36.1191	34.5682	36.6582	38.9553	46.8413
GSU0036		0.243842	0.119835	0.49961	49.2583	43.7087	45.2689	48.394	52.8649	62.4267
GSU0037	serS	-0.232454	0.0698177	0.49961	2487.01	2009.96	1978.07	1888.47	1879.6	1743.33
GSU0038		-0.318153	0.052167	0.49961	930.547	663.266	672.43	600.188	609.585	607.913
GSU0040		-0.152177	0.298466	0.594755	38.7305	36.2563	43.2799	33.4149	33.8705	39.1554
GSU0041	lexA-1	0.214201	0.372828	0.640436	33.6115	55.8246	61.8568	54.4539	64.3792	56.7476
GSU0042		-0.199296	0.261172	0.572612	17.0955	20.9857	22.7538	16.302	16.9353	19.7699
GSU0043		0.00179426	0.986967	0.997117	56.5987	56.9219	55.6911	55.4781	57.1513	56.7903
GSU0044		-0.172608	0.290186	0.586284	54.7636	43.5258	43.7573	45.5347	43.4518	37.0205
GSU0045		-0.164662	0.552606	0.766555	2.07657	1.69165	1.39228	1.45097	1.89103	1.23829
GSU0046		0.0658833	0.829967	0.922124	1.11073	1.09729	1.3525	1.70702	0.924506	1.11019
GSU0048		-0.514753	0.141496	0.501836	8.3063	3.61191	4.57462	3.79812	3.69802	4.01375
GSU0049		-0.303909	0.122644	0.49961	12.7492	10.6986	9.58682	8.62044	9.95945	8.1556
GSU0050		-0.153762	0.544574	0.761951	10.5277	5.57789	7.39895	7.21215	6.93379	6.96002
GSU0051	cas3-1	-0.163004	0.251357	0.565428	115.564	91.5779	92.4471	90.9841	81.7347	94.8356
GSU0052	csx14	-0.131724	0.501997	0.732468	42.8354	27.9352	30.9085	30.2142	28.5756	33.9888
GSU0053	csb1	-0.1521	0.429987	0.678238	76.7367	52.2127	53.543	49.8023	52.949	61.4446
GSU0054	csb2	-0.169444	0.308261	0.60029	142.463	107.626	105.296	100.629	95.5182	119.815
GSU0055		-0.0258777	0.895675	0.958489	19.4136	15.042	14.4399	17.3262	17.6917	12.9806
GSU0056		-0.267046	0.281425	0.583107	15.695	10.5157	10.7802	12.6746	9.41315	8.6253
GSU0057	cas1-1/cas4	-0.00598053	0.970622	0.98966	60.607	59.2079	58.3165	52.0214	52.7388	72.6318
GSU0058	cas2-1	-0.392343	0.157387	0.512457	7.91996	5.07496	4.89286	4.43825	3.82409	5.33744
GSU0060		-0.145923	0.651	0.823396	3.47705	2.33174	1.71051	1.96307	1.97508	2.81817
GSU0061		-0.294221	0.101209	0.49961	57.1299	40.8283	45.4678	37.5544	41.6868	37.7036
GSU0062		-0.297147	0.146822	0.503229	32.5974	21.5343	26.0555	22.746	23.1967	19.3002
GSU0063		-0.386135	0.0391265	0.49961	23.1321	17.9224	20.1283	14.723	15.0022	17.0798
GSU0064		-0.0246927	0.939655	0.977033	0.531217	0.685806	0.59669	0.768158	0.462253	0.555093
GSU0065	tadA	-0.304419	0.0463904	0.49961	83.1113	69.4493	65.3176	58.5507	58.1598	59.6939
GSU0066		-0.0546959	0.821598	0.916695	101.221	57.2419	64.4027	65.0801	63.959	85.4844
GSU0067	can-1	-0.0459096	0.871651	0.944171	82.4352	45.9947	49.1275	55.5634	43.5358	72.8453
GSU0068		0.0714733	0.750646	0.883047	55.8743	39.9596	45.7064	42.4621	41.4347	64.8178
GSU0069		0.265278	0.135455	0.501836	37.3783	36.5306	36.3981	40.0723	38.7032	53.8014
GSU0070		-0.0342103	0.848766	0.932868	113.439	92.3552	89.7819	85.3082	83.7098	119.601
GSU0071		-0.0771567	0.788498	0.902778	201.717	113.524	101.596	126.874	106.276	161.874
GSU0073		-0.0318723	0.856568	0.937248	501.082	386.612	352.922	365.686	360.851	486.902
GSU0074	elbB	0.314674	0.0361078	0.49961	153.184	190.654	191.418	211.628	210.409	243.729
GSU0075		0.342975	0.0482339	0.49961	53.4597	51.7097	58.4358	65.8909	60.303	81.3425
GSU0076		0.0101671	0.92828	0.972564	66.2089	62.2712	61.0613	60.8125	63.8329	66.2269
GSU0077		-0.160618	0.399179	0.659433	38.8271	26.0606	26.851	26.9282	27.357	27.7547
GSU0078		0.525816	0.00699156	0.49961	96.2951	110.598	115.44	140.744	139.138	184.248
GSU0079		0.0971305	0.420027	0.669346	74.7567	79.5077	75.5012	84.3267	87.9961	73.4431
GSU0080	degQ	0.109419	0.219345	0.545341	499.875	480.018	480.455	507.198	506.755	561.456
GSU0081		0.0288258	0.822105	0.916695	37.0403	33.2387	36.4379	33.9697	36.6861	38.216
GSU0082	rluD	0.0197553	0.839162	0.927756	188.099	198.975	205.46	188.967	198.727	213.028
GSU0083		0.228947	0.223291	0.547881	150.045	236.512	228.174	229.253	245.54	245.736
GSU0084		0.31675	0.191429	0.529099	209.782	369.101	399.902	396.242	404.807	418.199
GSU0085	hdrF	0.113099	0.398181	0.659433	68.6235	88.0117	82.5023	82.449	85.3907	90.8218
GSU0087	hdrE	0.0728422	0.65853	0.827807	57.806	81.1994	84.73	79.0776	78.7931	77.4996
GSU0088	hdrD	0.221606	0.415769	0.66602	22.2628	44.7603	43.9959	42.206	42.9475	44.3648
GSU0089	hdrG	0.0127673	0.914736	0.964808	56.4056	65.1973	62.8513	61.282	60.261	64.5616
GSU0090	hdrA	0.139722	0.312683	0.601323	160.669	208.393	217.672	221.443	215.62	209.398
GSU0091	hdrB	0.126325	0.411097	0.665173	69.7343	97.0644	94.8339	95.593	92.1144	97.9099
GSU0092	hdrC	-0.0643337	0.559719	0.770042	97.1644	85.1313	85.3266	87.3567	84.9284	83.6483
GSU0093		-0.00760111	0.950004	0.982943	73.2596	73.0154	70.5685	73.1884	78.3308	64.1773
GSU0094	dnaX	0.0187058	0.844834	0.930669	285.939	298.508	292.617	275.897	291.261	321.356
GSU0095		-0.285031	0.0692877	0.49961	105.133	84.1255	80.394	75.7489	76.4398	69.0878
GSU0096	recR	-0.00345683	0.977296	0.991314	344.615	372.758	366.01	362.571	409.934	308.29
GSU0097	por	0.10325	0.415428	0.66602	3284.51	4256.7	4003.87	4101.07	4460.15	3840.43
GSU0098	mglB	-0.125566	0.302703	0.597608	153.232	144.476	128.726	127.045	120.942	142.872
GSU0099	mglA	-0.231642	0.0879109	0.49961	253.052	203.227	198.936	181.541	182.674	193.77
GSU0101		-0.0428021	0.684405	0.843191	87.5059	90.7092	93.5212	93.3739	86.6094	83.8191
GSU0102	selB	0.310003	0.0628878	0.49961	160.138	219.641	215.882	253.322	260.416	224.77
GSU0103		-0.240588	0.15175	0.505136	340.993	248.947	232.351	235.483	224.739	235.701
GSU0104		0.193614	0.208766	0.54276	25.933	33.3302	31.7439	35.9754	33.3242	34.8001
GSU0105		-0.136593	0.68213	0.8425	1.15902	1.37161	1.07404	0.810834	0.882483	1.57988
GSU0106		-0.155478	0.0851093	0.49961	418.744	424.377	410.244	372.386	389.931	362.988
GSU0107		-0.121784	0.217003	0.544423	194.908	211.32	207.807	181.029	185.994	197.314
GSU0108	atpX	-0.14453	0.112432	0.49961	565.746	522.081	579.346	511.039	487.13	510.088
GSU0109	atpF	-0.281476	0.0168757	0.49961	424.394	368.369	367.919	319.255	310.172	325.498
GSU0110	atpH	-0.176193	0.0849066	0.49961	1180.32	1024.59	1026.9	951.535	915.261	993.446
GSU0111	atpA	-0.050755	0.567641	0.776249	6565.11	7063.2	6982.66	6648.49	6882.82	6367.18
GSU0112	atpG	-0.205741	0.0640954	0.49961	2762.13	2494.87	2428.69	2277.67	2348.24	2038.26
GSU0113	atpD	-0.112728	0.210282	0.544423	8045.37	7787.23	7529.51	7131.07	7384.28	7090.8
GSU0114	atpC	-0.275738	0.0253825	0.49961	1381.26	1161.07	1119.91	994.423	1035.45	995.197
GSU0115	pdxA	-0.21271	0.0887783	0.49961	215.143	208.759	207.767	189.607	197.13	158.33
GSU0116		-0.197251	0.12087	0.49961	100.255	95.7385	97.1013	86.7592	92.9969	75.877
GSU0117		-0.168339	0.260202	0.572612	225.043	177.624	166.238	168.867	182.842	154.487
GSU0118		0.274253	0.0724821	0.49961	184.284	255.851	237.363	268.301	272.393	278.7
GSU0119		0.00613467	0.964913	0.985966	120.055	104.608	88.5488	98.2816	104.343	111.873
GSU0120	hyaP	-0.077757	0.831076	0.922749	5.50534	7.45242	6.00668	3.28601	5.58906	9.09499
GSU0121	hyaB	0.0836526	0.817406	0.916186	15.1155	15.5906	9.90505	10.1141	10.3377	22.5453
GSU0122	hyaL	0.18428	0.37724	0.643672	35.7847	29.8097	25.2599	32.7321	28.5336	41.9309
GSU0123	hyaS	0.279784	0.102952	0.49961	14.7292	12.1159	14.1217	18.1797	15.6746	15.8842
GSU0124		0.363326	0.192728	0.529809	19.4136	38.4966	37.5517	42.1633	41.981	38.7284
GSU0125		0.150927	0.232037	0.5512	78.6684	94.184	97.9367	101.952	99.9727	98.7639
GSU0126	yccM-1	0.0127837	0.896239	0.958489	115.419	121.799	114.246	121.326	111.655	121.608
GSU0127	ttcA	-0.0734536	0.542797	0.760096	64.3738	67.5747	66.9088	65.2081	66.6905	57.0892
GSU0128	priA	0.177158	0.323765	0.60821	209.782	315.836	328.418	325.443	329.502	310.767
GSU0129	def-1	-0.133502	0.179509	0.523795	119.331	124.588	125.941	113.389	114.092	109.695
GSU0130	fmt	-0.0672919	0.439108	0.68645	274.881	284.838	293.969	266.807	271.553	276.436
GSU0131		-0.153275	0.128744	0.49961	229.486	215.206	227.816	197.886	193.768	213.07
GSU0132	cheX40H	-0.0863014	0.623947	0.810536	47.4715	35.2047	33.0964	33.7136	38.4931	36.807
GSU0133		-0.0341088	0.822479	0.916695	74.5635	93.8639	103.307	84.5401	97.3673	83.5202
GSU0134		0.092867	0.496664	0.730813	38.972	47.2292	46.6611	45.364	49.1669	47.1829
GSU0135	hemB	0.144451	0.106471	0.49961	664.311	735.092	708.907	760.775	762.213	807.362
GSU0136		0.0419932	0.686014	0.844557	105.954	104.608	97.698	110.871	107.075	99.4044
GSU0137		-0.136805	0.272605	0.578493	39.5998	37.0792	37.5119	34.3537	35.3834	34.1169
GSU0138	prfC	-0.178901	0.0878702	0.49961	287.243	257.04	289.912	239.964	253.945	243.003
GSU0139		-0.278583	0.0700027	0.49961	25.6433	25.832	30.1129	22.5326	21.6418	23.1004
GSU0140		0.245472	0.0650554	0.49961	73.6942	88.4689	88.1112	96.1478	102.368	98.2088
GSU0141		0.22749	0.0548857	0.49961	115.177	129.526	135.091	144.755	152.712	147.228
GSU0142	pgpA	0.0446141	0.766917	0.889927	49.548	39.7767	44.0357	47.2844	40.3421	49.9157
GSU0143	cinA	0.566573	0.0296548	0.49961	35.5915	60.2595	60.1066	77.6693	70.8087	82.5808
GSU0144		0.00358371	0.980337	0.993298	178.585	157.004	151.798	155.68	139.979	192.916
GSU0145	recA	0.0493903	0.548759	0.7659	447.864	447.008	415.893	443.27	450.991	462.137
GSU0146	pilT-1	0.127743	0.198032	0.531158	396.433	457.981	448.87	471.948	456.412	495.613
GSU0147	recX	0.348597	0.210566	0.544423	42.8837	88.3318	84.6106	93.6299	91.5261	89.7543
GSU0148	alaS	0.0857156	0.386718	0.651353	989.077	1150.42	1191.67	1163.03	1156.35	1215.74
GSU0149		0.031407	0.699458	0.852996	390.396	403.391	385.263	404.009	388.082	412.904
GSU0150	argB	0.0254061	0.743478	0.879035	569.851	563.458	565.622	582.307	595.214	551.592
GSU0151	argD	0.218579	0.206027	0.541905	535.804	784.425	826.654	809.084	835.669	853.435
GSU0152	argF	0.22876	0.146311	0.503229	381.076	531.637	544.619	574.71	589.162	543.949
GSU0153	argG	0.170219	0.127203	0.49961	1338.47	1615.8	1601.83	1695.11	1789.84	1641.75
GSU0154		-0.272495	0.0932341	0.49961	216.93	164.273	153.071	149.193	144.349	148.722
GSU0155		-0.0506332	0.592749	0.79224	309.168	359.545	349.7	327.577	326.393	329.341
GSU0156	argH	0.105158	0.267297	0.576542	351.569	402.248	395.605	419.372	415.481	401.503
GSU0157		0.510357	0.156921	0.512457	38.5857	99.7161	98.1356	113.474	115.941	107.517
GSU0158	lysA	0.0721977	0.499918	0.732125	774.514	953.91	947.703	950.766	964.89	897.842
GSU0159	dapA	0.223769	0.238655	0.556147	444.435	725.125	692.041	717.289	728.847	727.898
GSU0160	dapB	0.348866	0.237409	0.555616	146.809	325.3	313.063	328.516	340.89	330.708
GSU0162	dapL	-0.0470173	0.599652	0.797222	499.44	563.961	547.483	522.604	542.139	494.503
GSU0163		-0.195646	0.374619	0.641877	29.4101	21.3971	22.3958	22.7887	24.7936	16.3112
GSU0164		0.0233281	0.906254	0.960905	23.1321	16.7794	18.8554	21.4231	22.3142	15.9696
GSU0165		-0.235805	0.433879	0.682707	57.6612	31.7757	29.3969	38.6213	36.0137	26.2175
GSU0167		-0.159532	0.620627	0.809879	7.48533	3.56619	4.57462	4.865	5.50501	3.58676
GSU0168		-0.0905845	0.520064	0.746873	37.3783	31.5928	32.1815	33.6283	32.1476	29.2064
GSU0169		-0.212021	0.113913	0.49961	217.461	248.445	281.041	215.383	227.975	201.542
GSU0170		-0.173804	0.330316	0.612666	33.2735	39.0452	45.8258	32.476	40.0479	32.2381
GSU0171		0.287869	0.474333	0.715318	2.99413	8.86975	9.4277	8.70579	8.36257	9.00959
GSU0172		-0.140744	0.47198	0.714265	9.75507	7.68102	8.75145	7.08413	7.26998	9.39389
GSU0173		0.262469	0.194234	0.529809	26.8989	38.4508	37.2334	36.2315	47.57	39.2835
GSU0174	ato-2	0.265853	0.0645265	0.49961	1024.91	1327.13	1258.02	1341.03	1395.04	1604.52
GSU0175		0.368609	0.156107	0.512457	52.8802	92.1266	102.989	110.999	111.823	97.4829
GSU0176		0.069814	0.64466	0.81999	33.4184	37.8565	42.9219	43.0595	36.2658	40.5645
GSU0177		0.0294588	0.84289	0.929028	26.9955	35.6619	32.7782	33.5856	31.9375	31.8965
GSU0178	hxlR	-0.0415851	0.817557	0.916186	6.22972	6.03509	6.12602	6.14527	6.68165	5.03854
GSU0179		0.00814781	0.954608	0.983012	24.6291	30.9527	28.2831	27.5257	27.0628	29.7615
GSU0180		-0.136668	0.333693	0.615294	32.0662	28.8496	26.7317	25.2639	26.4325	28.0109
GSU0181		0.0814502	0.766083	0.88985	250.251	171.269	121.963	189.18	154.603	231.132
GSU0182		0.596996	0.00601522	0.49961	62.2972	82.9825	59.9474	103.189	93.249	113.965
GSU0183		0.0779067	0.606683	0.80068	174.819	154.672	126.936	155.509	145.82	180.363
GSU0184		0.154909	0.284554	0.583543	22.9872	27.1122	28.5616	29.1047	29.206	29.2918
GSU0185		0.211241	0.129869	0.49961	64.6153	67.209	67.1873	73.7859	69.2959	87.3205
GSU0186		-0.122557	0.568905	0.777289	30.7623	19.294	23.1118	19.46	21.936	25.7905
GSU0187		0.319819	0.145266	0.503229	6.90582	4.9378	7.39895	7.80961	7.69021	8.5399
GSU0188		-0.21709	0.340504	0.619065	15.4536	10.6071	9.6266	11.3517	9.74933	9.56469
GSU0189	dbpA	-0.10017	0.453136	0.699943	64.7601	80.6507	77.8481	64.952	71.271	72.0767
GSU0191		-0.498406	0.0392556	0.49961	561.786	332.25	342.341	288.614	294.035	292.491
GSU0192		-0.389883	0.0406227	0.49961	94.8463	67.9862	79.9167	61.4953	54.9661	68.7889
GSU0193		0.443319	0.0113226	0.49961	26.8023	25.8777	31.1074	37.6824	36.0137	40.2656
GSU0194		0.488082	0.0548401	0.49961	25.933	33.9702	43.0412	44.9373	42.2331	57.3027
GSU0195		-0.196941	0.449833	0.696436	38.2959	22.9516	23.788	21.4231	21.978	30.7436
GSU0196		0.0958724	0.415673	0.66602	292.797	357.213	368.754	348.146	384.552	356.114
GSU0197		0.321423	0.117078	0.49961	154.294	246.89	223.997	242.226	294.077	244.967
GSU0198		0.00826972	0.977497	0.991314	16.0814	15.2249	13.6045	11.2663	11.4303	22.4599
GSU0200		0.208329	0.17386	0.521581	38.6822	33.7416	33.0168	40.2856	36.644	44.8772
GSU0201		0.367707	0.06217	0.49961	119.137	119.239	120.611	132.422	132.709	198.083
GSU0202		0.775841	0.0083502	0.49961	12.3146	19.8426	18.378	26.1174	25.9702	34.5012
GSU0203		0.520677	0.0841231	0.49961	12.9907	22.2201	22.356	23.8129	23.5329	35.3125
GSU0204		-0.030459	0.901504	0.959253	33.4184	52.3498	40.4556	35.1646	34.3748	54.0576
GSU0205		-0.299324	0.122488	0.49961	116.675	81.3366	80.1951	80.6139	77.7845	67.636
GSU0206		0.127785	0.45919	0.703813	48.8236	65.563	73.4326	68.1527	71.229	65.8853
GSU0207		-0.299619	0.172889	0.521581	229.872	140.727	147.422	134.982	156.83	128.995
GSU0208		0.120262	0.413006	0.665705	545.608	690.606	601.941	695.269	749.816	552.873
GSU0209		-0.183458	0.383528	0.647948	44.912	49.6066	43.6777	45.8761	46.7296	29.0784
GSU0210		-0.041472	0.667877	0.833359	656.439	563.641	549.671	573.814	559.914	585.837
GSU0211		-0.0558111	0.560021	0.770142	483.552	472.063	472.061	430.297	436.913	506.288
GSU0212		-0.226078	0.1816	0.523795	359.682	251.051	249.933	238.513	242.683	254.574
GSU0213		0.372485	0.111328	0.49961	35.2052	57.562	60.9817	66.6164	66.1022	66.3977
GSU0214		-0.0807813	0.465814	0.708589	137.054	125.411	116.394	113.517	118.337	126.348
GSU0215	folD-1	-0.0379088	0.744002	0.879346	357.799	304.223	280.206	292.711	305.255	319.776
GSU0216		-0.146224	0.335018	0.615294	27.7199	22.0829	27.6864	23.6849	23.2387	23.1004
GSU0217		0.299287	0.0310349	0.49961	132.804	129.983	123.992	147.06	148.257	180.619
GSU0218	sco	0.19614	0.139883	0.501836	228.954	246.524	241.898	264.417	241.044	316.403
GSU0219	coxA	-0.138875	0.574573	0.782138	597.667	364.163	356.86	365.174	332.99	499.413
GSU0220	coxC	0.405298	0.04746	0.49961	39.2135	47.3206	49.7242	53.9418	53.4953	73.0588
GSU0221	coxD	0.147823	0.438393	0.686287	37.0886	33.1016	38.0688	37.3837	32.6098	49.9584
GSU0222	coxB	0.072335	0.640927	0.818934	117.495	111.969	121.685	113.346	104.973	150.9
GSU0223	ctaB	0.685335	0.0319222	0.49961	7.38874	14.1276	13.525	17.9237	16.6831	21.8194
GSU0224		0.154061	0.406814	0.662374	19.8482	13.9904	16.23	18.3078	16.8092	20.5812
GSU0226		0.217778	0.316279	0.602741	180.614	283.512	327.026	303.422	325.132	291.637
GSU0227		0.363513	0.0868698	0.49961	80.7449	124.268	130.277	147.828	152.249	131.386
GSU0228		-0.167388	0.203579	0.538828	473.169	364.163	365.333	346.909	361.314	362.647
GSU0229		0.0302101	0.810705	0.913509	125.319	154.215	140.62	144.926	156.073	128.056
GSU0230	pilT-2	0.310318	0.126821	0.49961	30.8106	21.8086	24.6234	29.3607	28.9959	37.4048
GSU0231		0.000151776	0.998924	0.999712	97.261	84.857	89.7024	88.7223	86.0631	97.0559
GSU0233		0.212786	0.126639	0.49961	45.7812	50.1553	54.1397	56.545	62.11	55.2958
GSU0234	fdhC	0.308476	0.155205	0.511586	48.6305	76.1702	81.667	81.8088	90.1393	83.8191
GSU0235	tex	0.192621	0.346366	0.623238	87.9405	145.848	138.949	135.58	154.813	135.656
GSU0236		0.396531	0.241794	0.557111	10.8658	26.655	25.3394	27.9097	28.7437	26.1748
GSU0237		0.519398	0.16627	0.515758	19.2204	49.0122	52.27	59.1482	53.4112	60.2917
GSU0238		0.429375	0.131499	0.49961	110.203	224.807	225.549	249.011	252.978	253.037
GSU0239		0.267631	0.35844	0.630102	30.4725	65.1515	64.5618	62.9036	66.5644	63.4514
GSU0240	fabD-1	0.217975	0.277465	0.582574	48.0027	75.21	76.0978	73.5725	78.4149	79.8907
GSU0241		0.269556	0.192429	0.529809	181.531	291.833	305.704	307.647	320.089	311.493
GSU0242	acpP-1	0.244378	0.108435	0.49961	29.6516	36.0277	36.3185	41.8219	40.3421	38.6857
GSU0243		0.310746	0.127638	0.49961	162.263	258.412	263.498	280.804	288.614	279.297
GSU0244		0.073654	0.491372	0.727671	296.322	342.811	369.391	351.006	355.304	355.089
GSU0245		0.304312	0.192032	0.529809	40.2276	72.6954	62.8513	76.0903	73.2461	67.7641
GSU0246		0.422915	0.16097	0.513677	46.6505	90.9836	97.3798	108.353	119.345	87.4912
GSU0247		0.316193	0.224181	0.547881	90.2103	176.298	169.102	183.291	192.045	167.126
GSU0248		0.21625	0.357927	0.630102	47.7612	73.3812	84.7697	81.9795	89.7611	67.5506
GSU0249		0.0686745	0.704941	0.853682	32.8871	39.3195	41.4898	41.0111	46.1833	32.0673
GSU0250		0.0754043	0.505741	0.735069	112.28	135.972	130.675	139.207	130.439	129.636
GSU0251		-0.148385	0.439679	0.686705	11.397	8.22967	8.67189	7.85228	9.07696	8.5826
GSU0252		-0.56328	0.035378	0.49961	17.8682	10.6528	12.3714	8.66312	8.82483	10.1625
GSU0253		-0.00356576	0.9693	0.98925	175.736	188.551	186.963	181.456	191.751	176.69
GSU0254		-0.0821583	0.615982	0.807579	23.5184	19.294	19.6908	17.3689	19.5407	22.1183
GSU0255		0.012696	0.93647	0.976196	68.7201	62.7741	61.4591	69.2196	73.3301	52.0934
GSU0256		-0.113992	0.550634	0.766184	30.1828	24.2775	22.5947	25.8187	26.1383	19.2148
GSU0257		-0.197235	0.194584	0.529809	27.7199	29.3525	24.1858	21.7645	24.5834	24.5095
GSU0258		-0.152236	0.419087	0.668794	4.63607	4.11483	3.85859	3.67009	4.11825	3.54406
GSU0259		-0.0320834	0.814474	0.914919	47.1817	47.4578	43.3197	44.6812	49.9653	40.2656
GSU0260	usp-3	-0.140791	0.534473	0.755341	15.3087	26.975	23.8278	18.7345	20.7594	20.4958
GSU0261		-0.256652	0.228368	0.548573	36.8954	58.0192	58.5154	39.8589	42.6113	45.9873
GSU0263		-0.256863	0.116181	0.49961	23.8565	19.9341	19.0941	16.7715	17.8177	18.0192
GSU0264		0.423888	0.112112	0.49961	13.5219	21.7172	24.7427	27.1416	30.1305	23.2712
GSU0265		-0.0156587	0.916613	0.966159	43.0286	48.6922	57.2822	45.9615	52.3606	49.1044
GSU0266		-0.238667	0.13982	0.501836	39.5515	29.6725	33.2555	29.4887	28.8278	28.5233
GSU0267		0.385309	0.0251452	0.49961	26.6091	30.6327	34.25	41.3952	39.4176	38.7284
GSU0268		0.106071	0.35309	0.62775	73.5011	84.7656	79.0813	84.6254	82.323	88.516
GSU0269		0.267574	0.175001	0.521754	10.4795	15.4078	12.4907	16.5581	14.708	14.9448
GSU0270	glmS	0.139235	0.282421	0.583107	548.892	722.885	730.348	729.281	754.355	721.408
GSU0271	glmU	0.193058	0.258464	0.572225	211.762	318.397	312.944	324.76	317.442	321.698
GSU0272		-0.175159	0.205824	0.541905	138.889	113.844	104.381	104.47	104.469	107.304
GSU0273		0.0502762	0.598515	0.796167	181.193	191.203	205.142	195.027	202.971	200.047
GSU0274		-0.129704	0.194754	0.529809	7574.76	6801.73	6570.75	6264.67	6539.83	6341.64
GSU0276		0.398465	0.158971	0.513677	1.2556	1.87454	1.47183	1.74969	1.84901	2.47657
GSU0277		0.211955	0.559017	0.770018	3.42876	6.03509	5.13153	5.16373	3.52993	8.241
GSU0278		0.13243	0.658491	0.827807	1.54536	2.78894	1.67073	2.04842	2.60542	1.92148
GSU0279		0.214153	0.170252	0.518131	16.2263	16.4136	18.8554	21.6365	19.1205	19.0013
GSU0280		-0.0137874	0.911498	0.962597	128.361	102.917	107.683	119.961	106.612	109.14
GSU0281		-0.109642	0.456531	0.701651	111.459	80.8336	91.8107	93.2885	83.9199	86.0822
GSU0283		0.0697387	0.448415	0.695322	304.387	334.947	345.285	351.176	345.891	336.344
GSU0284		-0.154633	0.351911	0.62775	55.15	38.588	45.5473	42.2914	40.7203	42.1017
GSU0285	radA	0.128055	0.382385	0.647479	118.123	158.741	163.294	161.441	165.655	153.974
GSU0286		0.0985788	0.409992	0.664674	273.045	335.588	335.658	318.658	329.124	363.33
GSU0287		-0.10738	0.264246	0.573752	275.557	277.294	254.787	241.799	245.246	262.645
GSU0288		0.261691	0.0774492	0.49961	57.806	68.7177	70.7276	84.7961	79.2133	72.5037
GSU0289		-0.221276	0.136	0.501836	64.9533	68.672	58.5552	53.3016	49.9653	61.5727
GSU0290	fabH-1	-0.138132	0.14912	0.503616	433.618	430.869	439.721	375.715	381.737	427.678
GSU0291		-0.0933273	0.512222	0.740657	15.5019	15.7278	14.5195	13.5281	15.1703	14.1762
GSU0292		0.0863669	0.650914	0.823396	63.3114	89.932	97.34	78.0961	100.897	87.107
GSU0293	cheB64H-1	-0.0456181	0.709775	0.85725	43.4149	46.4519	44.7915	44.8946	44.8805	40.6926
GSU0294		-0.196354	0.159094	0.513677	28.6374	29.5354	28.3627	24.2397	23.9111	27.3704
GSU0295	cheR64H	-0.344473	0.177425	0.523535	9.65849	6.35513	6.96138	4.95035	7.22795	5.89253
GSU0296	cheA64H	-0.12638	0.478702	0.71839	11.7834	11.4301	9.86527	9.17522	9.37113	11.7424
GSU0297	cheW64H-1	0.245828	0.37946	0.644713	4.4429	4.252	2.98345	4.31022	3.52993	5.97793
GSU0299		-0.553022	0.230586	0.549962	1.3039	0.502924	0.716028	0.725483	0.42023	0.555093
GSU0301		0.268415	0.0447187	0.49961	459.841	592.628	585.393	660.488	645.935	666.411
GSU0302		0.1283	0.257702	0.572068	548.94	659.014	689.137	668.255	676.192	729.136
GSU0303		0.01727	0.856799	0.937248	437.095	395.618	375.596	391.078	402.706	429.044
GSU0304	pepN	-0.177571	0.050212	0.49961	387.595	384.371	398.43	346.141	343.748	344.969
GSU0305	hypB	-0.102094	0.238302	0.556031	547.781	506.079	494.895	473.143	488.769	481.01
GSU0306	hypF	0.0421408	0.657537	0.827807	805.807	968.906	937.519	944.237	925.766	922.651
GSU0307	hypC	-0.0171012	0.888984	0.954667	49.0168	46.8177	48.4114	51.4239	44.9646	46.1581
GSU0308	hypD	0.165415	0.269411	0.577738	354.37	499.221	492.349	495.505	525.75	488.269
GSU0309	hypE	0.19526	0.182921	0.524051	263.097	366.403	340.153	358.858	393.083	358.291
GSU0310		0.0599049	0.549058	0.765946	248.175	253.611	255.224	275.982	275.377	237.751
GSU0312		-0.224268	0.108546	0.49961	174.577	135.012	138.551	131.611	124.178	127.8
GSU0313		0.211546	0.217353	0.544423	28.4925	39.3652	38.0688	40.3283	43.0736	39.2835
GSU0314		0.04596	0.783729	0.90042	16.6126	15.865	14.8775	13.7842	16.2629	18.8305
GSU0315		-0.161879	0.473884	0.715318	3.1873	4.75492	4.25639	3.28601	3.52993	4.09915
GSU0316		-0.124736	0.675929	0.838513	8.06484	9.05264	6.56359	6.6147	10.2116	4.86774
GSU0317		-0.100486	0.423645	0.6732	429.658	336.959	333.51	332.698	357.658	335.703
GSU0318		0.054657	0.649962	0.823009	62.0075	64.8315	69.216	72.3349	68.6656	62.6401
GSU0319	gspN	0.39027	0.0697874	0.49961	94.6049	150.237	155.139	175.951	177.841	170.542
GSU0320	gspM	0.239932	0.139764	0.501836	71.8108	101.911	96.8627	106.475	106.108	107.005
GSU0321	gspL	0.327139	0.0526256	0.49961	256.626	372.164	352.405	414.976	400.731	415.295
GSU0322	gspK	0.0679226	0.50356	0.733153	201.621	227.779	230.203	218.712	234.236	238.477
GSU0323	gspJ	-0.0886592	0.35443	0.62775	169.555	156.867	160.708	157.686	153.216	147.185
GSU0324	gspI	-0.207529	0.229646	0.549962	112.618	78.319	81.0703	82.705	77.0702	75.7489
GSU0325	gspH	0.413102	0.0235038	0.49961	71.3762	98.8017	96.3057	122.692	122.077	110.122
GSU0326	gspG	0.0273803	0.793438	0.905063	109.817	97.4301	97.0218	101.909	102.704	105.468
GSU0327	gspF	0.112566	0.401651	0.659433	429.658	563.549	594.025	563.273	568.235	584.599
GSU0328	gspE	0.147089	0.165662	0.515758	416.232	491.54	499.708	527.085	503.015	528.492
GSU0329	gspD	-0.000767439	0.993308	0.998817	855.935	741.265	732.178	796.537	759.734	771.836
GSU0330	gspC	0.0526055	0.584526	0.789553	366.54	413.907	437.254	422.914	423.171	416.875
GSU0331	degP	-0.0190281	0.87106	0.943835	2657.77	2359.13	2030.42	2194.24	2340.93	2419.74
GSU0332	pepA	-0.0172066	0.904013	0.960905	518.371	525.83	485.188	489.701	605.425	416.107
GSU0333	atpE	-0.1661	0.283629	0.583107	2770.39	2146.43	1888.8	1953.77	2151.28	1960.38
GSU0334	atpB	-0.219161	0.0944374	0.49961	1247.97	951.624	984.578	908.048	915.345	911.976
GSU0335	atpI	-0.297275	0.0321118	0.49961	172.452	145.711	136.881	125.893	123.926	120.455
GSU0336	atpZ	-0.0240815	0.800965	0.908155	234.508	205.879	218.508	219.01	219.654	209.313
GSU0337	hemL	-0.0211556	0.813866	0.914919	720.233	647.081	610.772	644.911	647.07	657.273
GSU0338	nuoA-1	-0.0834759	0.525122	0.749797	360.262	321.14	266.521	288.785	317.988	287.795
GSU0339	nuoB	-0.0560447	0.652448	0.824917	610.948	490.168	454.996	484.58	510.075	502.103
GSU0340	nuoC	-0.158274	0.36492	0.63461	820.343	604.241	514.307	571.467	607.106	558.765
GSU0341	nuoD	-0.16644	0.344408	0.620926	2428.29	1715.34	1532.66	1708.68	1665.33	1683.68
GSU0342	nuoE-1	-0.163962	0.197828	0.531158	1073.59	857.486	808.594	819.113	794.991	831.188
GSU0343	nuoF-1	-0.246783	0.131184	0.49961	3163.4	2389.67	2178.47	2085.55	2093.5	2336.81
GSU0344	nuoG-1	-0.254027	0.135647	0.501836	4875.6	3686.8	3294.6	3164	3176.69	3601.96
GSU0345	nuoH-1	-0.292525	0.105788	0.49961	2556.36	1888.21	1682.15	1616.67	1566.07	1819.47
GSU0346	nuoI-1	-0.315499	0.0895415	0.49961	918.136	660.522	602.577	555.378	557.477	639.852
GSU0347	nuoJ-1	-0.256117	0.151199	0.505121	1126.76	793.614	755.688	716.82	704.515	819.36
GSU0348	nuoK-1	-0.401205	0.109929	0.49961	518.371	321.186	281.16	271.8	265.459	311.279
GSU0349	nuoL-1	-0.250565	0.158171	0.512457	6306.36	4555.03	4178.14	4206.35	3929.11	4506.21
GSU0350	nuoM-1	-0.242492	0.158205	0.512457	4768.83	3527.97	3179.24	3109.16	3118.82	3472.45
GSU0351	nuoN-1	-0.24015	0.166349	0.515758	4962.96	3533.68	3320.54	3197.54	3276.32	3531.16
GSU0352	prx-3	-0.245111	0.118343	0.49961	289.368	218.223	207.449	200.532	207.72	195.009
GSU0353	yqaA	-0.226009	0.0984042	0.49961	386.388	296.405	310.12	286.352	292.942	269.605
GSU0354		-0.145745	0.134815	0.501763	425.215	383.503	372.255	352.073	362.826	352.57
GSU0355		-0.342827	0.0440762	0.49961	96.8263	74.2042	74.5465	63.7571	60.8493	69.0024
GSU0356		-0.111639	0.673971	0.837682	124.836	79.9192	81.0305	74.8101	70.7667	118.875
GSU0357		-0.0411669	0.869298	0.942228	718.978	482.213	472.936	464.693	430.946	731.314
GSU0358		0.0673506	0.634203	0.816381	16.6609	15.3163	14.9172	17.1129	16.6411	15.3718
GSU0359		-0.154149	0.287385	0.58483	147.775	110.323	117.866	104.171	116.067	117.594
GSU0360		-0.0570503	0.703789	0.853682	7627.16	5615.97	5806.47	5755.77	5697.85	6857.32
GSU0361		-0.104852	0.578877	0.785819	69.4928	55.0473	43.3595	49.2048	53.2851	53.5879
GSU0362		0.0716922	0.585531	0.789659	48.1476	41.4684	44.3937	43.4009	48.3685	49.0617
GSU0363	dinG	0.0329461	0.817474	0.916186	205.001	282.003	283.547	260.406	271.847	256.154
GSU0364	ppcB	-0.482829	0.0242975	0.49961	112.376	100.951	100.841	64.5253	64.9675	95.3053
GSU0365	ppcC	-0.0563272	0.676132	0.838513	39.0686	35.0675	35.2445	32.0493	35.1732	37.9598
GSU0366		0.195206	0.156702	0.512457	68.7201	84.4913	86.6394	88.5089	89.9712	96.1592
GSU0367	yhcC-1	0.264162	0.204531	0.540077	45.7812	68.9921	75.0238	74.1699	72.2375	81.5987
GSU0368		0.113492	0.299374	0.594867	109.527	106.026	106.688	120.601	122.371	105.639
GSU0369		0.237536	0.275057	0.581499	5.45704	5.89793	7.67741	8.53509	6.47154	7.47241
GSU0370		0.421165	0.15396	0.508992	54.4256	111.695	117.19	123.46	124.22	131.813
GSU0371		0.134619	0.136933	0.501836	422.849	445.499	460.406	469.131	482.928	506.672
GSU0372		0.0746787	0.401777	0.659433	178.489	183.019	187.48	192.168	194.062	191.934
GSU0373		0.0320369	0.76764	0.889927	79.3928	84.9485	89.6626	90.7707	85.2646	83.691
GSU0374	hypA	0.356217	0.234533	0.553425	13.377	25.009	28.7605	30.7263	30.7188	24.5949
GSU0375	gcvT	0.224415	0.0431215	0.49961	99.4341	106.62	105.654	119.363	120.606	124.213
GSU0376	gcvH-1	0.249697	0.312474	0.601323	48.1476	42.4285	42.6434	42.0353	42.8634	73.4858
GSU0377	gcvP1	0.5009	0.0382351	0.49961	88.6166	153.712	145.115	176.079	180.573	191.721
GSU0378	gcvP2	0.141149	0.21764	0.544423	196.116	193.58	199.851	199.38	207.341	243.43
GSU0379	lplA	0.456117	0.0424433	0.49961	23.1321	32.4157	30.3516	34.055	36.9382	46.884
GSU0380	lipA	0.181783	0.229675	0.549962	37.7164	39.2738	39.3418	41.3952	39.7117	50.8551
GSU0381		-0.620383	0.0154766	0.49961	6.32631	5.76077	4.33595	3.54206	3.57195	3.54406
GSU0382		0.0293688	0.840856	0.927803	73.7908	71.5067	68.4602	67.3845	64.2952	86.4665
GSU0383		0.0170449	0.861055	0.939029	201.09	181.556	177.734	184.315	186.498	196.204
GSU0384		-0.141854	0.471842	0.714265	148.403	101.682	92.1687	94.9956	102.326	112.812
GSU0385		0.251039	0.032024	0.49961	105.326	107.031	103.864	118.296	133.171	124.853
GSU0386		-0.0675982	0.702098	0.853682	13.6185	17.5109	19.4521	16.4301	15.1283	16.7382
GSU0387	uppP	0.0882851	0.583767	0.789553	54.1841	77.7704	72.279	68.9209	75.6414	72.5891
GSU0388		-0.231259	0.0466844	0.49961	325.781	285.021	278.415	252.425	261.845	243.216
GSU0389		0.066177	0.590981	0.791221	552.321	700.436	722.233	643.034	713.214	711.502
GSU0390		-0.122502	0.313894	0.601876	70.7484	71.0037	65.5165	63.9278	67.615	58.8399
GSU0391		-0.035044	0.867326	0.941497	17.4336	23.226	28.6013	20.1001	22.5243	25.0219
GSU0392		0.168286	0.405268	0.661154	22.0696	31.5013	36.2787	32.9455	33.5764	34.5012
GSU0393		0.334462	0.227024	0.548573	0.869264	1.41733	1.07404	1.36561	1.4708	1.40908
GSU0394		-0.0896656	0.366501	0.634964	115.612	119.925	122.242	114.2	106.654	115.374
GSU0395		0.134148	0.494785	0.729555	7.96825	9.73844	11.4962	9.68733	11.9345	10.4614
GSU0396		-0.245441	0.321444	0.606912	8.01654	5.34928	4.89286	5.46246	5.33692	4.56885
GSU0397		0.0287738	0.868733	0.941919	20.814	28.5295	28.9593	28.3365	24.2473	27.3277
GSU0398		0.0381571	0.850878	0.934581	7.09899	10.9272	9.38792	10.0287	8.61471	9.52199
GSU0399		0.614978	0.0522359	0.49961	2.5595	4.43488	5.05197	6.05991	5.54703	6.91732
GSU0400	mcp40H-11	-0.142995	0.660971	0.829109	2.26974	3.79479	3.89837	4.13952	2.68947	2.22037
GSU0401	mcp40H-12	-0.0649697	0.739869	0.877846	46.7471	40.0053	32.261	34.055	34.2908	45.3896
GSU0402		-0.407291	0.108933	0.49961	8.06484	6.03509	6.24535	5.93189	5.50501	3.88565
GSU0403	cheY64H-1	-0.338288	0.0849898	0.49961	17.2887	16.9623	12.6896	11.6077	13.1952	12.2975
GSU0404	cheX64H	-0.105589	0.557079	0.768605	36.9437	29.0324	25.2599	26.6295	30.9289	27.1996
GSU0405		-0.215901	0.133663	0.500214	30.1345	26.7007	26.2941	23.3435	23.1967	25.0219
GSU0406		0.152726	0.484277	0.721282	14.6326	20.9399	21.998	20.2282	18.322	25.4916
GSU0407	flgB	0.114361	0.541461	0.758541	4.00827	4.06911	3.77904	4.82233	3.78207	4.22725
GSU0408	flgC	0.0588635	0.743147	0.878952	5.21558	4.84636	4.57462	4.60895	5.6731	4.95314
GSU0409	fliE	0.0552751	0.838868	0.927734	4.05656	3.29187	2.90389	4.09684	2.43733	4.09915
GSU0410	fliF	0.0442424	0.794703	0.905512	18.7858	15.4535	15.4344	17.2836	14.7501	19.1721
GSU0411	fliG	-0.209852	0.334951	0.615294	27.5267	18.3796	17.6222	18.7772	16.473	19.6418
GSU0412	fliH	0.54154	0.0907928	0.49961	4.05656	6.12653	8.95035	10.0287	8.7828	9.13769
GSU0413	fliI	0.139448	0.458457	0.70301	14.9224	13.1217	13.8432	13.1014	14.2038	18.8305
GSU0414	fliJ	0.375074	0.283144	0.583107	0.965849	2.33174	1.47183	1.83504	2.14317	2.22037
GSU0415		0.0664996	0.756908	0.88469	2.07657	1.69165	2.06852	1.9204	1.93306	2.26307
GSU0416	fliK	0.235367	0.247358	0.562049	26.6574	27.2493	28.0842	26.2454	28.9959	41.2904
GSU0417	flgD	0.0573965	0.779084	0.898353	6.85752	6.30941	6.76249	6.44399	5.71513	8.5826
GSU0418		0.373956	0.132256	0.49961	5.07071	3.47475	4.01771	4.65162	5.1268	6.49032
GSU0419	flgE	0.131912	0.418602	0.668336	16.8541	18.0138	17.8211	18.009	17.1874	22.5453
GSU0420	fliL	0.0546574	0.851385	0.93477	2.5595	2.0117	2.3072	2.00575	1.80699	3.33056
GSU0421	fliM	0.068076	0.821215	0.916695	13.1355	10.2871	7.35917	8.74847	8.74078	14.7313
GSU0422	fliN	0.453267	0.374917	0.64194	2.12487	1.55449	0.835366	1.32294	1.38676	3.41596
GSU0423	fliP	0.166441	0.616524	0.807974	4.4912	5.25784	2.90389	5.0357	3.06768	6.06333
GSU0424	fliQ	0.180807	0.667286	0.833359	2.26974	2.19458	0.755807	1.79237	2.35329	1.70798
GSU0425	fliR	0.300495	0.163954	0.51437	2.36633	2.33174	2.06852	2.68855	2.52138	3.11706
GSU0426	flhB	-0.0741248	0.742581	0.878591	3.47705	2.51462	3.30168	2.47518	3.27779	3.07436
GSU0427		0.570877	0.107904	0.49961	20.5726	47.092	48.3319	59.4042	64.5473	48.4639
GSU0428	tssJ	-0.436124	0.21982	0.545341	1.2556	1.00585	0.914924	0.554781	1.0926	0.683192
GSU0429	tssK	0.589823	0.166655	0.516034	0.386339	1.14301	0.875145	1.49364	1.0926	1.06749
GSU0431	tssF	-0.257024	0.414981	0.66602	2.89755	2.10314	2.22764	2.85926	1.59687	1.57988
GSU0432	tssG	-0.0122253	0.975721	0.990824	0.338047	0.594365	0.636469	0.725483	0.462253	0.384295
GSU0433	tssH	-0.392306	0.282312	0.583107	1.01414	1.92026	2.1083	0.93886	1.38676	1.53718
GSU0434		-0.101745	0.387458	0.65195	359.634	389.492	412.71	359.626	403.042	320.075
GSU0435		-0.662915	0.122015	0.49961	0.627802	1.46305	1.19338	0.512105	0.882483	0.683192
GSU0436	pilT-3	-0.3347	0.393976	0.657668	0.531217	0.685806	0.755807	0.298728	0.672368	0.597793
GSU0437		0.405813	0.11922	0.49961	94.2668	171.36	173.677	197.459	212.972	171.695
GSU0438		-0.0666491	0.550925	0.766184	109.672	119.513	126.777	111.17	121.951	106.791
GSU0439		0.279607	0.184998	0.524054	87.2161	138.807	142.529	154.485	158.175	134.802
GSU0440		0.20292	0.224969	0.547881	102.38	150.009	146.905	151.669	153.888	154.102
GSU0441	mqnC-2	0.368656	0.164287	0.51437	152.894	279.992	311.83	324.59	326.561	310.553
GSU0442	mqnC-1	0.25773	0.16865	0.517455	120.924	181.876	186.406	192.253	205.913	186.81
GSU0443		0.114572	0.503053	0.733057	165.884	230.751	244.802	243.335	247.557	203.634
GSU0444		0.866167	0.0244958	0.49961	45.0085	67.3461	57.6005	80.5713	72.4056	156.878
GSU0446	rsmE	0.387479	0.055398	0.49961	37.33	53.0814	50.4004	61.8367	54.1256	68.2765
GSU0447	prmA	0.32968	0.136386	0.501836	51.9144	82.7082	88.1112	95.8917	96.1066	88.0036
GSU0448		0.0619041	0.498366	0.731162	181.483	184.207	193.924	194.344	200.576	189.244
GSU0450		-0.0139291	0.878167	0.948792	228.713	213.194	210.87	215.042	222.049	209.398
GSU0451		-0.0541579	0.718316	0.861979	753.845	591.85	543.425	559.774	570.252	689.426
GSU0452		0.0542631	0.586315	0.789659	849.609	859.772	795.189	821.545	810.623	968.382
GSU0453	mqnB	0.38842	0.132209	0.49961	81.2279	143.196	147.382	146.633	152.459	187.707
GSU0454	mqnD	0.0104068	0.937372	0.976279	140.531	138.258	133.539	121.71	130.355	163.24
GSU0455		-0.254808	0.0748053	0.49961	796.728	606.069	599.276	570.357	565.881	541.643
GSU0456		0.165736	0.168841	0.517455	250.058	296.451	316.047	323.907	333.368	310.34
GSU0457		0.394773	0.149256	0.503616	82.6283	157.324	165.88	170.104	193.054	170.542
GSU0458	fabZ-1	0.409313	0.341756	0.619065	8.78922	29.4896	29.3571	30.8544	29.9204	29.1637
GSU0459		0.34299	0.100643	0.49961	93.2044	138.99	156.452	165.581	168.512	158.97
GSU0460	fabF-1	0.275493	0.109202	0.49961	176.412	250.593	261.231	276.793	280.672	275.668
GSU0461	fabG-1	0.220833	0.16816	0.517455	50.4173	69.6321	66.1132	72.4629	72.3636	72.1621
GSU0462		0.239021	0.274094	0.580555	42.6422	66.9346	70.8072	73.4445	76.3558	63.1525
GSU0463		0.200955	0.132364	0.49961	102.621	117.41	130.357	138.439	139.684	124.683
GSU0464		-0.0416473	0.822929	0.916695	6.03655	8.00107	8.19454	7.2975	6.80772	7.51511
GSU0465	efp-1	0.0442929	0.692301	0.848571	63.5528	58.8878	62.016	61.4953	65.3878	63.3233
GSU0466	macA	0.0574258	0.757334	0.884869	1111.45	891.913	951.442	896.355	853.235	1325.18
GSU0467		-0.186726	0.497749	0.731162	19.1238	18.151	22.4753	14.3816	13.0271	25.1073
GSU0468		-0.151851	0.681614	0.842214	21.7316	30.1755	26.9306	18.009	14.4979	38.4722
GSU0469		0.0950972	0.727021	0.867486	2.41462	2.74322	2.98345	2.34715	2.39531	3.97105
GSU0470		-0.122328	0.423163	0.672752	24.3394	22.3115	27.2091	25.0078	21.7679	21.0935
GSU0471		0.0157823	0.931244	0.973994	12.218	17.4195	17.4233	16.5581	15.5485	15.4999
GSU0472		0.0452046	0.822221	0.916695	52.7353	33.1473	34.966	42.1207	40.0479	42.486
GSU0473		0.148881	0.278844	0.583056	36.3642	37.5822	43.3197	41.95	45.1327	42.9557
GSU0474		-0.100682	0.457341	0.702355	24.2911	25.4205	27.2886	25.6053	22.9445	23.2712
GSU0475		0.0261119	0.832903	0.923561	46.3607	42.3371	46.6611	48.0099	43.2837	46.5424
GSU0476		0.207496	0.215419	0.544423	194.474	275.1	280.564	287.761	310.97	267.512
GSU0477		0.00375254	0.971364	0.989857	162.552	139.31	147.86	153.589	142.038	155.255
GSU0478		0.0480507	0.658907	0.827807	97.261	93.8639	85.8836	92.2217	93.207	100.942
GSU0479	aspA	0.37901	0.0628585	0.49961	309.699	483.767	493.383	536.43	559.956	577.212
GSU0480		-0.256018	0.0879495	0.49961	36.3642	31.8214	34.608	26.3734	28.7437	30.9571
GSU0481		-0.139433	0.243847	0.558594	388.464	333.484	318.473	293.564	309.205	341.767
GSU0482	cls-1	-0.0243807	0.791143	0.903704	160.621	174.835	172.324	164.258	164.268	170.755
GSU0483	queC	-0.10862	0.289287	0.585822	218.91	198.472	194.521	187.644	198.727	181.131
GSU0484	folE	-0.215466	0.0970673	0.49961	298.061	230.751	250.252	222.894	224.487	223.575
GSU0485		0.0105185	0.932299	0.974174	84.3669	89.2919	86.6394	82.6624	79.9697	99.5752
GSU0486	tdcB	0.0857641	0.353414	0.62775	170.762	168.754	162.3	183.163	177.001	172.378
GSU0487	dmeF	-0.00366945	0.975838	0.990824	107.692	106.986	112.217	118.126	114.092	93.8535
GSU0488	trxB	-0.0611007	0.517555	0.745001	198.434	218.315	208.324	197.417	208.14	193.599
GSU0489	comM	0.0446649	0.662231	0.829263	162.504	185.305	178.609	170.019	183.935	189.031
GSU0490	ato-1	-0.100639	0.491651	0.727765	2766.09	2326.85	2103.29	2060.24	2052.32	2598.73
GSU0491	rhlE-1	-0.0581335	0.791577	0.903894	6006.42	8523.79	10365.1	7074.91	7222.87	9614.47
GSU0492	xerC	0.289537	0.13823	0.501836	28.8789	41.9256	39.4611	46.1748	48.6206	40.0094
GSU0493		0.148365	0.280553	0.583107	164.822	214.474	212.78	230.447	222.47	203.335
GSU0494		0.256661	0.234826	0.5536	46.2641	73.244	75.0238	79.7604	83.6678	69.0451
GSU0496		-0.00349398	0.971952	0.989859	421.834	353.419	383.154	380.836	370.307	404.45
GSU0498		-0.0094361	0.94887	0.982675	33.032	41.3769	34.4091	35.3353	33.7024	39.07
GSU0499		-0.00795252	0.949406	0.982776	151.687	150.603	152.076	167.587	157.25	127.031
GSU0500	typA	-0.146571	0.0850152	0.49961	937.018	897.445	967.632	826.325	845.671	859.413
GSU0501	yfiO	-0.159081	0.163433	0.51437	362.386	301.389	306.181	303.593	282.31	282.756
GSU0502		0.014647	0.918496	0.96752	53.508	71.4152	63.9254	66.9151	60.7232	63.1525
GSU0503	crcB	0.0791522	0.642509	0.819418	47.5197	67.2547	65.9541	66.9151	66.4383	57.6016
GSU0504		-0.06073	0.633806	0.816381	61.1382	53.0356	56.8049	53.0456	59.1684	51.7091
GSU0505		-0.110571	0.321203	0.606912	124.643	109.043	111.024	101.568	105.352	112.342
GSU0506		-0.145404	0.337426	0.618081	86.4434	63.9171	69.5343	63.4157	65.2617	70.1126
GSU0507	plsY	0.161817	0.194092	0.529809	92.3834	113.661	108.717	115.864	123.085	113.196
GSU0508	yceG	-0.0969302	0.339866	0.619065	159.268	143.425	142.609	140.957	141.87	133.521
GSU0509	sfrA	-0.107349	0.334884	0.615294	1861.96	1659.28	1562.21	1502.43	1482.61	1733.86
GSU0510	sfrB	-0.0253744	0.808007	0.912979	1589.06	1414.36	1346.97	1368.52	1345.2	1560.79
GSU0511		-0.0352711	0.700637	0.853657	152.99	159.061	148.536	149.364	153.93	146.16
GSU0512		-0.265061	0.0322053	0.49961	92.6249	86.0915	88.2703	74.2553	76.776	71.1373
GSU0513		0.106675	0.572824	0.780509	33.2735	50.3381	44.5131	46.9857	50.3015	40.6926
GSU0514		-0.272354	0.078815	0.49961	417.488	312.865	303.516	281.53	284.538	289.887
GSU0515	usp-1	-0.167326	0.366618	0.634964	16.7092	12.2073	12.1725	12.7173	11.9766	11.8705
GSU0516		0.0190567	0.906684	0.960905	42.9803	30.8155	33.8124	34.6951	38.2829	36.0384
GSU0517		0.0410323	0.700871	0.853657	70.4104	68.9463	72.0006	73.3164	69.548	74.596
GSU0518	aplD	0.342997	0.021007	0.49961	81.6142	100.265	103.108	120.345	121.404	119.772
GSU0519		0.327928	0.107308	0.49961	32.0662	40.1425	45.1893	55.7341	50.5536	41.1196
GSU0520	truD	0.273789	0.228572	0.548573	59.3514	91.2579	101.477	96.7453	117.244	90.8645
GSU0521	trmB	-0.00531724	0.96345	0.985068	72.8733	76.6274	80.4338	78.2241	81.0203	69.8564
GSU0522	rhlB	-0.0916053	0.32571	0.608811	488.816	496.02	533.998	449.885	465.867	509.661
GSU0523		0.317883	0.0664478	0.49961	115.757	166.514	160.311	185.297	175.152	191.294
GSU0524		0.21391	0.110239	0.49961	187.858	232.168	244.046	256.736	247.599	265.932
GSU0525	dtd	-0.0838947	0.479084	0.71839	114.984	100.996	102.989	98.6657	92.6187	109.652
GSU0526	ymdB	0.4286	0.0387729	0.49961	13.0872	17.8309	19.0145	21.8072	22.9445	22.5026
GSU0527		0.240104	0.180738	0.523795	116.288	172.046	176.819	186.108	184.103	179.252
GSU0528		0.488169	0.163674	0.51437	24.8706	59.5737	63.0502	68.5795	69.0858	69.344
GSU0529	nfo	0.124869	0.49533	0.729686	67.3196	96.1957	108.16	97.4707	101.528	97.3121
GSU0530		-0.0411403	0.720096	0.862136	53.6529	56.4189	54.3783	53.515	50.9739	55.3385
GSU0531	dapF	0.24613	0.0994929	0.49961	124.015	156.684	163.254	183.462	183.094	160.038
GSU0533		-0.0822708	0.466584	0.708704	68.044	63.6428	65.2381	64.696	61.0174	60.2917
GSU0534	iscR-1	-0.467749	0.00150073	0.49961	2651.45	2203.36	2443.29	1674.5	1843.8	1758.88
GSU0535	cysK	0.100904	0.641309	0.818934	2483.24	4083.24	4475.09	3875.1	4311.01	3655.5
GSU0536		-0.0202766	0.936534	0.976196	588.974	941.657	1076.95	901.263	1025.44	644.591
GSU0537		-0.255965	0.221858	0.54726	215.577	247.347	278.694	225.284	245.414	150.388
GSU0538	hspA-1	-0.436925	0.0979501	0.49961	100.883	100.402	70.3298	55.094	56.3528	89.1565
GSU0539		0.114218	0.732176	0.87117	51.6729	28.5295	28.2831	33.2015	29.1219	55.0396
GSU0540		0.0815997	0.647085	0.822144	6.08485	6.67518	6.52381	6.65737	7.77425	5.97793
GSU0541	polA	0.398497	0.0306333	0.49961	129.617	190.7	177.615	219.779	226.714	209.911
GSU0542		0.189485	0.0838659	0.49961	438.109	511.2	531.571	572.961	565.293	550.524
GSU0543		0.165892	0.426607	0.675361	46.2159	41.7884	38.4666	44.0837	37.1063	60.676
GSU0544		0.374863	0.0601331	0.49961	37.2335	40.7369	41.5694	46.9003	44.1241	64.0065
GSU0545		0.265015	0.235695	0.553798	37.7647	61.0367	62.8911	68.9209	67.0267	58.4129
GSU0546		0.00152413	0.996301	0.999264	10.1414	21.0314	24.0267	19.2466	21.4737	14.6032
GSU0547	mutS-2	0.140497	0.358653	0.630102	165.112	225.219	229.885	228.1	243.355	212.259
GSU0548		0.235404	0.23844	0.556031	195.198	213.148	206.136	205.226	200.071	318.111
GSU0549		-0.105883	0.592133	0.792016	6.66436	8.45827	9.6266	8.40706	7.05986	7.55781
GSU0551		-0.115516	0.518149	0.745074	20.9106	16.9165	14.599	16.7288	16.515	15.1156
GSU0552		-0.21358	0.286907	0.584761	137.199	89.3833	86.9576	95.0809	89.2148	86.0395
GSU0553		-0.359898	0.0810801	0.49961	90.9829	62.3169	60.1861	57.4838	56.5629	52.2642
GSU0555		-0.518929	0.104228	0.49961	1.83511	1.18873	1.43206	1.02421	1.26069	0.81129
GSU0556		-0.153308	0.368158	0.635755	10.5277	8.45827	9.58682	8.96185	8.82483	7.89941
GSU0559		-0.454106	0.128184	0.49961	5.02241	2.83466	2.94367	2.51785	2.73149	2.60467
GSU0562		-0.135065	0.400462	0.659433	124.739	86.7316	93.4814	96.7026	90.2654	90.6937
GSU0563		-0.342378	0.117517	0.49961	58.2407	38.588	37.313	36.5729	36.0557	33.1348
GSU0564		-0.283132	0.262989	0.572867	80.1654	43.8458	50.7186	54.1552	46.0572	43.34
GSU0566		-0.107574	0.402074	0.659433	47.8095	47.1834	48.9286	48.778	42.1911	42.6141
GSU0567	tag	0.142918	0.276321	0.582266	40.1793	45.6747	41.7683	49.7596	45.5529	45.6031
GSU0568		0.658475	0.0674449	0.49961	4.39461	10.6986	9.54704	13.1014	13.7415	12.1267
GSU0569		0.383135	0.0337451	0.49961	38.1027	52.2584	46.4225	55.8195	60.8073	61.7862
GSU0570		0.584624	0.0550504	0.49961	11.6385	23.4546	22.5947	29.062	28.2394	29.2918
GSU0571	folA	0.330105	0.11113	0.49961	12.1697	18.3796	17.4233	19.5027	19.9609	20.88
GSU0572		0.496724	0.0787372	0.49961	37.4749	72.101	73.0348	83.9426	85.0545	88.7722
GSU0573		0.638393	0.0827959	0.49961	24.3394	61.0367	59.6292	70.8413	76.776	78.2255
GSU0574		0.420448	0.285983	0.583738	4.78095	12.4359	14.3206	14.339	15.6325	12.3402
GSU0575	cstA	0.206839	0.262068	0.572612	41.6764	60.7167	62.6127	62.4769	63.4967	64.5189
GSU0576		0.332146	0.249276	0.563516	13.3287	22.3573	13.0078	18.2224	17.1874	25.8759
GSU0577	recO	0.531035	0.120697	0.49961	9.85166	22.0372	22.7936	26.5441	28.9538	23.6128
GSU0578	glyQ	0.0493644	0.58639	0.789659	878.053	1006.31	973.241	1023.36	1002.67	931.062
GSU0579	glyS	0.171502	0.191187	0.528863	959.812	1246.52	1262.99	1324.52	1344.82	1237.99
GSU0580	ppdK	0.135761	0.47975	0.71839	2497.3	3340.06	3366.48	3616.62	3914.78	2580.67
GSU0581		-0.0432056	0.840142	0.927777	178.972	184.527	205.938	203.775	223.73	125.152
GSU0582	mcp40H-2	0.0149586	0.956111	0.983012	8.11313	8.91547	9.94483	10.3275	11.2201	5.72173
GSU0583	mcp64H-1	0.204007	0.252991	0.566458	103.636	87.4631	79.0017	98.495	88.1642	124.426
GSU0584		0.139282	0.287375	0.58483	120.441	95.5099	109.393	118.211	111.193	128.91
GSU0585	ycgM	-0.211852	0.0829343	0.49961	164.098	138.67	147.701	126.533	123.884	138.517
GSU0586	yhcC-2	0.0018105	0.987751	0.997117	214.901	272.082	260.435	247.304	238.354	262.73
GSU0587	tenI	0.251348	0.169926	0.518073	59.5446	87.5088	86.6791	86.1617	95.1821	96.9278
GSU0588	thiG	-0.0437221	0.705073	0.853682	283.477	344.732	330.168	302.654	288.362	338.778
GSU0589	thiS	-0.240085	0.0347991	0.49961	133.287	120.107	125.822	107.414	106.696	106.962
GSU0590		0.11793	0.415087	0.66602	60.607	65.563	75.7001	78.2241	76.3558	64.5189
GSU0591		-0.168996	0.139545	0.501836	159.703	136.292	149.212	135.025	136.407	124.554
GSU0592	omcQ	-0.142144	0.210657	0.544423	263.918	216.303	225.191	214.743	213.435	211.021
GSU0593		-0.321079	0.326727	0.609784	18.2545	15.6821	10.7404	10.1568	8.53067	17.0371
GSU0594		-0.120734	0.661689	0.82914	20.0897	21.7172	20.6455	14.6804	14.708	28.0536
GSU0596		-0.207686	0.52534	0.749797	5.98826	5.98937	4.49506	3.49939	3.61398	7.13081
GSU0597		0.105974	0.748062	0.881981	1.8834	1.87454	2.38676	1.87772	1.51283	3.24516
GSU0598		-0.233985	0.0812203	0.49961	600.033	456.564	479.739	444.38	436.871	425.031
GSU0599		-0.274583	0.0481983	0.49961	138.937	109.043	121.804	104.171	102.746	98.7639
GSU0601		0.0871179	0.503955	0.733153	649.92	902.612	832.422	841.645	856.134	835.672
GSU0602		-0.188966	0.16405	0.51437	133.577	110.14	103.188	103.531	102.326	98.4223
GSU0603		-0.0634565	0.680615	0.841596	77.1713	58.3392	59.0325	57.3131	66.1022	62.7255
GSU0604	thiC-1	0.0326808	0.765282	0.889224	320.613	363.843	401.453	355.23	366.104	389.505
GSU0605	thiE/thiD	0.121097	0.564604	0.774087	219.537	355.659	396.242	348.872	352.489	355.26
GSU0606	alr	0.174192	0.212201	0.544423	188.147	245.061	238.119	255.839	270.082	231.602
GSU0607	selD	0.379862	0.153036	0.507413	39.9378	71.0037	77.9675	86.8446	84.088	74.9803
GSU0608		0.384684	0.127356	0.49961	48.4856	83.8512	85.4858	97.0867	104.889	82.4954
GSU0609	purH	0.252978	0.187281	0.525222	288.596	440.379	444.375	475.49	505.368	417.473
GSU0610	purD	0.0784644	0.521519	0.748324	440.958	564.098	556.274	560.755	578.867	509.021
GSU0611	purE-1	-0.0224179	0.867506	0.941497	97.4541	100.402	103.307	96.3612	114.807	85.3563
GSU0612	ppcA	-0.177069	0.343402	0.620822	541.117	374.267	336.971	344.818	386.485	376.311
GSU0613		-0.0128139	0.898863	0.959253	3054.21	2618.36	2630.96	2622.75	2676.95	2930.38
GSU0614		-0.0266777	0.746629	0.881216	2176.2	2140.95	1960.44	2052.77	2058.62	2051.16
GSU0615		0.10535	0.267559	0.576542	319.406	357.808	366.129	368.332	373.542	380.538
GSU0616		-0.0466474	0.654989	0.826272	187.326	212.188	200.925	183.974	187.717	209.654
GSU0617		0.136924	0.458322	0.70301	274.639	218.635	218.786	326.595	215.578	240.74
GSU0618	omcE	0.285372	0.183881	0.524054	194.618	265.132	226.384	240.263	234.95	361.024
GSU0619		-0.0537166	0.704533	0.853682	174.239	161.896	148.098	142.237	139.895	184.376
GSU0621		0.0676283	0.624487	0.810536	69.4928	86.8687	92.0891	82.577	87.9121	89.9251
GSU0622		0.110519	0.356135	0.628736	91.4176	106.986	113.809	111.255	113.168	112.684
GSU0623		0.137401	0.19708	0.531158	140.917	160.89	161.146	170.062	174.227	164.948
GSU0624		0.367076	0.0392528	0.49961	55.0051	72.6497	66.511	75.4929	81.1044	93.8535
GSU0625		0.0932527	0.479449	0.71839	73.646	90.9378	95.1521	92.3497	95.098	89.6689
GSU0626	gmd	0.0431677	0.66228	0.829263	184.477	205.147	214.371	210.305	208.602	203.463
GSU0627	fcl	0.0601062	0.55971	0.770042	181.821	210.542	208.086	213.036	199.357	213.626
GSU0628		0.029449	0.798209	0.906275	78.1854	85.5885	86.3609	92.3497	83.8779	79.0795
GSU0629		0.0738683	0.518406	0.745126	81.3245	86	85.5255	97.044	87.0716	82.0257
GSU0630		0.0208185	0.845151	0.930714	81.4693	88.9719	82.2239	81.5101	89.3829	85.4417
GSU0631		0.00323302	0.980275	0.993298	76.9781	90.4806	84.4117	86.0764	92.3245	74.0409
GSU0632		-0.0885972	0.431244	0.67983	132.273	110.278	115.161	114.626	112.748	109.012
GSU0633		0.0426675	0.911126	0.962597	42.4008	103.282	48.0932	52.2774	56.5629	90.7364
GSU0634		0.479403	0.115402	0.49961	44.6222	87.7374	96.5842	106.305	117.328	95.6896
GSU0636		0.206163	0.253184	0.566514	226.83	346.743	344.688	354.974	370.307	334.123
GSU0637		-0.122901	0.348071	0.625209	76.6884	78.1818	81.9056	76.2184	78.2888	62.939
GSU0638		-0.0297188	0.865821	0.941222	12.3146	13.3504	12.9681	12.9307	14.582	10.3333
GSU0639		-0.314261	0.117145	0.49961	16.0814	11.1101	13.0476	10.2421	11.4303	10.6749
GSU0640		-0.1049	0.39889	0.659433	69.0582	65.0144	57.7994	59.703	59.2104	59.4804
GSU0642	ffh	-0.0860743	0.303851	0.598124	997.094	1025.97	932.427	942.53	893.367	948.398
GSU0643	rpsP	-0.252933	0.160065	0.513677	49.8378	36.4391	38.7848	35.8901	37.6526	31.3841
GSU0644		-0.154655	0.213224	0.544423	556.039	424.697	454.638	420.097	439.56	429.77
GSU0645	rimM	-0.29195	0.0301629	0.49961	1703.52	1369.23	1343.31	1222.27	1226.31	1158.39
GSU0646	trmD	-0.0710221	0.364261	0.63388	866.897	862.789	816.272	807.121	827.264	789.257
GSU0647		-0.0474701	0.813698	0.914919	604.187	535.614	526.32	439.386	722.669	450.095
GSU0648	rplS	-0.260372	0.0236615	0.49961	541.938	465.799	521.984	402.43	443.679	431.009
GSU0649	rnhB	-0.0873456	0.808437	0.912979	91.6107	103.465	222.088	108.14	115.521	169.175
GSU0650		-0.141534	0.344305	0.620926	25.5467	22.0829	25.061	23.8129	22.2722	19.8126
GSU0651		-0.159201	0.173455	0.521581	554.928	455.146	444.653	436.655	445.023	421.017
GSU0652	nadE	-0.0073119	0.928435	0.972564	299.027	304.955	308.131	299.24	304.246	304.02
GSU0653	rsmI	-0.0239962	0.830859	0.922749	108.127	97.2472	90.5775	97.8548	99.8886	93.2984
GSU0654	thiF-1	-0.300379	0.153966	0.508992	12.556	12.8017	9.98461	8.74847	11.4723	8.4545
GSU0655	rpoH	-0.329557	0.0912453	0.49961	22.2145	22.1287	16.9858	16.5581	14.2458	17.9765
GSU0656	ilvE	-0.107979	0.304032	0.59813	1516.24	1313.59	1261.2	1269.47	1332.76	1193.75
GSU0657		-0.0344032	0.856579	0.937248	14.2946	16.0936	19.6112	17.4969	17.8177	13.5357
GSU0658	clpB	-0.330275	0.0864388	0.49961	263.725	347.886	252.201	201.513	212.636	272.892
GSU0659		0.258543	0.224501	0.547881	28.5891	45.2175	45.428	44.6812	49.7132	48.2931
GSU0660	ispE	0.200866	0.204779	0.540308	172.742	247.804	228.373	252.084	262.349	231.474
GSU0661	prsA	-0.149763	0.236446	0.554449	1061.85	1087.87	1388.1	1041.49	1048.35	1099.21
GSU0662	rplY	-0.232728	0.0885343	0.49961	1080.78	838.237	829.359	754.843	821.003	763.04
GSU0663	pth	-0.168981	0.094691	0.49961	401.986	374.358	374.045	347.89	358.288	317.044
GSU0664	ychF	-0.127105	0.212176	0.544423	359.344	366.083	375.238	345.714	358.498	303.636
GSU0665	rpsF	-0.0823016	0.325085	0.608811	803.972	843.495	839.98	815.741	797.302	736.481
GSU0666	rpsR	-0.186888	0.111209	0.49961	675.756	563.138	566.895	504.979	570	511.369
GSU0667		0.0799061	0.488498	0.725326	1375.71	1735.13	1659.91	1708.17	1769.8	1564.51
GSU0668	rplI	-0.20015	0.213757	0.544423	409.713	300.703	289.673	279.097	313.786	277.589
GSU0670	omcX	-0.127414	0.259919	0.572612	1053.93	1047.64	1094.93	1007.23	1077.3	841.778
GSU0671		0.0789323	0.492921	0.728996	92.9146	100.448	103.267	104.598	113.21	95.5188
GSU0672		-0.030841	0.887081	0.953231	122.518	72.4211	76.3365	87.9968	81.0203	96.4581
GSU0673		0.152074	0.384033	0.648452	12.3146	9.4184	11.6553	12.6746	13.1112	11.3154
GSU0674	hcp	0.305076	0.108131	0.49961	1701.05	1518.28	1573.71	1753.75	1631.88	2536.09
GSU0675		0.186903	0.396465	0.658887	22.6974	31.5928	34.5682	35.4633	38.7452	26.9861
GSU0676		-0.0490607	0.82372	0.916695	8.74093	12.0245	14.6388	12.2479	11.7664	10.2479
GSU0677		0.118821	0.618536	0.809148	11.9765	18.7454	21.2422	17.8383	21.4737	17.1652
GSU0678		0.054287	0.809789	0.913247	14.198	24.0946	23.3107	20.7829	23.3228	19.898
GSU0679		0.160016	0.322465	0.60746	22.2145	22.8145	19.8101	23.3861	27.6931	21.3497
GSU0680		0.33263	0.00903886	0.49961	259.862	274.734	273.364	306.922	350.178	360.384
GSU0681		-0.0417036	0.789529	0.902778	56.5987	43.5258	43.3992	45.236	43.83	50.3427
GSU0682		-0.00339453	0.984173	0.995689	10.4312	10.0128	10.7404	8.62044	11.1781	11.3154
GSU0683	mcp34H-6	0.17253	0.33027	0.612666	3.8151	3.56619	3.6597	4.3529	4.03421	4.05645
GSU0684	cheW34H-4	0.084297	0.751668	0.883144	1.59365	1.64593	2.22764	1.74969	1.6389	2.43387
GSU0685	hpnH	-0.158274	0.218684	0.545341	520.93	407.14	411.358	377.635	402.244	420.334
GSU0686	dxs-1	0.219139	0.175612	0.522423	797.067	1131.76	1131.92	1131.67	1141.81	1289.44
GSU0687	hpnA	0.0359253	0.750994	0.883047	262.035	319.494	298.783	294.119	282.058	326.352
GSU0688	shc-1	0.0139509	0.862658	0.939865	993.182	1057.1	1095.05	1050.33	1031.41	1094.17
GSU0689	hpnN	0.086068	0.661173	0.829109	311.921	537.397	462.196	439.386	447.209	505.605
GSU0690		0.569176	0.218387	0.545079	19.4618	63.6428	71.3243	81.1687	84.5923	63.5368
GSU0691	yciH	0.32304	0.338515	0.618081	5.93997	13.579	14.8377	15.1071	14.0357	13.92
GSU0692		0.220319	0.208183	0.54253	19.0272	26.4264	25.7372	27.8671	28.0293	27.0715
GSU0693		0.177667	0.413644	0.665716	13.377	20.6199	21.7991	20.2708	23.0286	19.8553
GSU0694		0.404418	0.266571	0.576542	11.7351	30.6327	31.1074	31.9212	33.7024	31.7257
GSU0695		0.0627229	0.614994	0.80691	52.1558	61.1281	61.5386	60.1297	59.8828	62.5974
GSU0696		0.228834	0.300691	0.595213	11.397	16.9623	18.6167	18.5638	16.6411	19.898
GSU0697	hpnI	0.504593	0.113464	0.49961	18.9789	37.6736	43.081	44.7666	50.7638	46.0727
GSU0698		0.165784	0.341002	0.619065	80.2137	117.73	118.463	125.466	112.538	116.997
GSU0699		0.518951	0.105855	0.49961	15.357	25.6949	24.7427	43.3156	26.5585	24.4668
GSU0700		0.438486	0.0339612	0.49961	55.2465	69.7236	66.6304	78.9923	74.7589	105.937
GSU0701	omcJ	-0.146104	0.650728	0.823396	1.54536	1.18873	1.67073	0.896185	1.80699	1.28098
GSU0702		2.06407	0.0525963	0.49961	17.8199	22.2201	19.8101	20.3989	210.409	19.5137
GSU0703		0.246126	0.398801	0.659433	1.3039	1.82882	2.02875	1.62167	2.60542	1.92148
GSU0704		0.134454	0.475559	0.716136	5.50534	5.53217	6.88182	6.52934	7.22795	5.93523
GSU0705		-1.69547	0.0437099	0.49961	9.36873	7.45242	50.838	7.25483	6.51356	7.17351
GSU0706		0.47217	0.0248639	0.49961	19.3653	28.7581	26.2941	34.6098	34.5429	34.1169
GSU0707	sugE	0.127224	0.465985	0.708589	10.0931	9.50984	8.75145	11.7358	10.2536	8.96689
GSU0708	emrE	-0.00224037	0.986656	0.997117	32.3076	29.9468	32.4997	31.8359	34.2067	28.566
GSU0709		0.68078	0.0523986	0.49961	20.1862	26.5635	25.5383	32.9455	25.634	57.3454
GSU0710		0.395372	0.156606	0.512457	8.3063	7.08666	7.08072	8.53509	7.39605	13.6211
GSU0711		0.0244495	0.940457	0.977565	35.4466	25.2834	25.2996	24.6237	18.8263	44.0232
GSU0712		-0.0559806	0.890445	0.954999	15.3087	12.3902	9.58682	8.62044	7.22795	19.9834
GSU0713		-0.127467	0.75332	0.883402	103.104	57.882	52.8269	49.1194	42.4852	104.059
GSU0714		0.366744	0.140573	0.501836	354.563	373.947	392.025	398.717	368.247	677.94
GSU0715		0.1011	0.620999	0.809879	124.208	104.425	112.178	106.689	97.4513	161.404
GSU0716		0.307402	0.0576636	0.49961	173.708	163.725	181.115	200.233	184.943	256.539
GSU0717		0.530335	0.00793578	0.49961	61.9109	79.462	85.6449	101.184	106.948	119.815
GSU0718		0.411559	0.030331	0.49961	197.323	219.412	239.551	266.167	249.869	356.968
GSU0719		0.41127	0.0476197	0.49961	59.5446	73.4269	74.4669	81.3821	80.39	114.136
GSU0720		0.258338	0.138647	0.501836	60.5104	60.3966	51.9518	61.41	62.4041	82.9224
GSU0721	rpoE	0.615383	0.0380163	0.49961	62.3455	96.1042	90.5377	149.577	87.2397	144.709
GSU0722		0.263762	0.310386	0.601323	27.6716	50.7953	52.628	48.522	51.9824	56.9611
GSU0723		-0.155621	0.601034	0.797321	83.9805	179.635	89.8217	96.2758	104.469	116.527
GSU0724		0.465354	0.0466589	0.49961	25.595	37.3993	39.8589	45.108	42.9895	53.9722
GSU0725		-0.189619	0.609144	0.802984	0.676094	1.05157	1.39228	0.725483	0.798437	1.23829
GSU0726	cheD64H	-0.132565	0.366492	0.634964	148.209	105.888	126.061	114.84	109.806	122.121
GSU0727		-0.555276	0.140929	0.501836	25.5467	31.3185	27.9251	15.6192	11.5143	30.5728
GSU0728	ppk-2	0.268583	0.0414213	0.49961	71.1347	76.3988	84.5311	95.8491	92.7867	90.9499
GSU0729		0.219006	0.292391	0.587305	21.297	33.9245	32.5793	33.6283	32.3577	36.2519
GSU0731	lpxC	0.0148727	0.907148	0.960905	177.668	160.433	150.684	151.669	188.599	153.547
GSU0732	rnk-1	-0.12339	0.21682	0.544423	202.297	203.73	184.059	179.578	186.834	175.281
GSU0733	mreB-2	0.514005	0.0508985	0.49961	12.0248	19.1111	21.8786	24.7518	25.9702	25.0646
GSU0734	ehrA-2	0.457951	0.123238	0.49961	183.415	364.803	404.993	425.261	421.869	462.393
GSU0735		0.402297	0.174821	0.521754	139.324	286.072	302.243	298.173	311.769	351.886
GSU0736		-0.229996	0.0831101	0.49961	563.524	451.489	473.175	418.732	388.545	461.581
GSU0737		-0.22882	0.10032	0.49961	246.726	189.557	202.596	184.401	171.034	189.714
GSU0739	ehrA-1	0.504806	0.0582791	0.49961	268.313	507.13	495.611	574.369	593.701	635.625
GSU0740	ehrB	0.47734	0.0520845	0.49961	157.723	277.248	274.835	334.832	318.114	335.362
GSU0741	ehrC	0.484918	0.00992097	0.49961	172.549	218.223	185.173	243.25	314.794	247.999
GSU0742	ehrD	0.526652	0.0380106	0.49961	240.786	423.782	386.098	461.236	472.464	579.987
GSU0743	ehrL	0.427339	0.00612231	0.49961	265.319	337.142	331.799	404.222	414.473	437.712
GSU0745	ehrS	0.830981	0.028531	0.49961	47.7129	101.133	108.24	134.342	132.288	190.909
GSU0746		0.297115	0.0679537	0.49961	20.0414	19.5226	21.2819	22.0632	25.3399	27.3704
GSU0747		-0.0527575	0.76397	0.889147	12.218	8.82403	10.0642	9.94338	10.2116	9.82088
GSU0748		0.265587	0.235154	0.553729	3.38047	4.57204	4.01771	4.39557	4.32837	5.67903
GSU0750	mcp40H-23	0.14747	0.580883	0.787033	3.28389	2.28602	2.98345	2.56053	2.81554	4.09915
GSU0751		0.154391	0.337825	0.618081	57.3231	80.9708	78.5244	79.6751	78.7511	82.9224
GSU0752		0.506062	0.0279433	0.49961	31.6315	48.3722	49.0479	58.0386	65.0516	60.249
GSU0753		0.586418	0.110745	0.49961	1.06243	1.60021	2.1083	2.2618	1.80699	3.15976
GSU0754		0.382223	0.109878	0.49961	13.8116	21.7629	23.3107	23.5142	26.0542	27.2423
GSU0755		-0.448776	0.317807	0.603712	0.965849	0.685806	0.358014	0.426755	0.588322	0.426995
GSU0756	mcp40H-24	0.342485	0.105978	0.49961	2.36633	2.78894	2.34698	2.98728	3.15172	3.37326
GSU0757		0.49036	0.117468	0.49961	28.2028	63.1398	55.9695	66.6164	65.3457	75.0657
GSU0758		0.478605	0.262215	0.572612	1.49707	5.02924	3.10279	3.96882	5.37894	4.09915
GSU0759		-0.092884	0.476084	0.716136	50.0792	43.6172	44.7517	43.2302	40.9724	45.6031
GSU0761		-0.293222	0.338504	0.618081	5.50534	2.97182	3.42102	3.88347	3.19375	2.60467
GSU0762		-1.13817	0.0215669	0.49961	0.579509	1.28017	0.954704	0.46943	0.294161	0.512394
GSU0763		-0.162989	0.358964	0.630102	37.1852	29.4896	25.3792	28.7206	26.3064	27.1569
GSU0766	mcp64H-8	-0.545065	0.0950603	0.49961	2.07657	1.55449	1.47183	1.28026	1.38676	0.81129
GSU0767		0.250487	0.129016	0.49961	77.7991	77.6789	80.1553	84.7108	81.8187	113.794
GSU0768		0.565887	0.0242138	0.49961	26.2228	43.2515	40.734	58.6788	50.6377	53.8868
GSU0769	rarD	-0.111351	0.718863	0.861999	37.33	80.8336	86.7587	67.0431	68.1193	54.6126
GSU0770		-0.182478	0.324865	0.608811	14.0048	17.9224	15.0366	11.6077	15.1703	14.6032
GSU0771		0.322523	0.259799	0.572612	12.6526	25.2376	24.9814	26.4588	28.6177	23.6128
GSU0772		0.293073	0.176465	0.522423	24.1462	37.8565	39.3418	40.6697	42.6954	40.8634
GSU0773		0.270722	0.216773	0.544423	39.793	64.1914	65.3574	62.5622	69.506	72.2902
GSU0774		0.193423	0.297069	0.593434	17.7233	25.7863	24.4245	24.4104	25.7601	27.5412
GSU0775		0.208172	0.215529	0.544423	229.003	327.724	340.233	352.585	356.397	327.292
GSU0776		0.110716	0.501783	0.732468	155.405	214.109	235.732	218.712	228.311	206.58
GSU0777	fdnG	0.652301	0.0191775	0.49961	973.237	1356.02	1172.77	2039.46	2207.26	1257.37
GSU0778	fdnH	0.755919	0.00272564	0.49961	382.766	523.727	499.31	820.18	924.716	629.177
GSU0779	fdnI	0.688631	0.00120651	0.49961	937.694	1127.24	1084.03	1738.6	1936.5	1400.29
GSU0780	fdhD/mobA-2	0.876177	0.0049214	0.49961	363.787	614.756	565.742	983.925	1111.89	738.872
GSU0781	fdnT	0.534674	0.00437601	0.49961	68.527	64.1457	69.8923	101.738	109.218	82.4954
GSU0782	hybS	0.051743	0.52892	0.751542	1760.69	1950.75	1886.22	1932.43	1927.68	1941.97
GSU0783	hybA	0.0990798	0.314146	0.601876	1320.51	1436.44	1553.86	1585.86	1448.28	1583.17
GSU0784	hybB	0.0529517	0.604566	0.800077	2178.66	2457.56	2234.52	2325.98	2194.06	2607.57
GSU0785	hybL	0.174745	0.179024	0.523795	3277.12	3993.17	4249.43	4144.77	4193.14	4665.22
GSU0786	hybP	-0.449963	0.187809	0.525222	1913.73	894.839	832.581	821.503	813.229	1030.68
GSU0787	hybT	-0.152823	0.242649	0.557111	252.714	199.981	225.35	197.417	189.103	223.361
GSU0788		-0.0267845	0.86579	0.941222	301.248	237.472	199.454	238.47	230.916	255.129
GSU0789		0.488749	0.0129716	0.49961	49.5963	61.9511	63.0104	78.8642	72.6577	93.4692
GSU0790		0.312654	0.0248744	0.49961	130.438	117.959	133.977	150.9	147.375	176.648
GSU0791		0.243452	0.278353	0.582985	5.26387	8.00107	7.27962	9.08987	7.10188	8.1556
GSU0792		0.332295	0.281612	0.583107	20.6209	39.6853	46.144	47.5831	48.8727	37.6609
GSU0793		-0.286476	0.0894199	0.49961	87.6025	71.6896	76.7741	68.9209	70.5566	54.0576
GSU0794		-0.142995	0.263387	0.572995	189.838	198.792	224.156	194.259	198.559	162.173
GSU0795		-0.044161	0.875572	0.946898	9.36873	16.9165	18.8156	15.2778	16.515	11.9986
GSU0796		0.562544	0.0744698	0.49961	10.7692	20.0712	23.1913	28.4645	27.5671	23.869
GSU0797		0.181913	0.141781	0.50219	48.8236	51.2068	50.838	54.2832	58.496	58.3702
GSU0798		0.0773771	0.504546	0.733648	165.933	193.351	210.99	200.66	198.475	202.609
GSU0799		-0.00929193	0.907377	0.960905	469.789	448.06	467.725	463.669	442.208	470.805
GSU0800		0.0535272	0.589159	0.790546	852.458	858.126	741.924	804.859	824.113	916.203
GSU0801		0.488495	0.125548	0.49961	17.2404	23.0888	22.2366	23.5142	21.3057	42.9984
GSU0802		0.454458	0.106758	0.49961	24.3877	29.0324	33.4544	34.0977	30.0885	54.9115
GSU0803	ppsA	0.425075	0.0618755	0.49961	230.886	224.533	223.321	264.929	239.027	407.353
GSU0804	wrbA	0.578935	0.00872794	0.49961	59.7377	70.638	72.8757	90.9414	88.4164	124.298
GSU0805	fxsA	0.547247	0.0423862	0.49961	3.1873	4.7092	5.37021	5.97456	6.72368	6.74652
GSU0806	citG	0.144974	0.182379	0.523795	118.993	124.542	120.412	131.739	145.357	125.323
GSU0807	citX	-0.0380976	0.785614	0.901665	59.0133	67.3918	72.9155	67.0858	69.5901	57.4735
GSU0808		0.455275	0.102021	0.49961	93.2527	185.488	179.564	207.232	223.982	197.272
GSU0809		0.0952274	0.362014	0.631634	173.66	182.333	189.628	192.978	209.569	180.32
GSU0810		0.365948	0.114739	0.49961	95.8605	81.748	78.9222	93.0752	90.0973	147.399
GSU0811		0.308278	0.190769	0.528257	102.67	170.766	175.944	189.138	208.77	158.629
GSU0812		-0.0342083	0.723567	0.8649	468.05	522.492	564.071	513.898	515.076	489.251
GSU0813		0.131451	0.262545	0.572612	263.145	239.209	249.496	258.357	254.743	310.468
GSU0814		0.41321	0.0118149	0.49961	403.773	498.398	546.647	613.417	621.31	694.678
GSU0815		0.146336	0.185356	0.524054	157.288	144.979	173.517	177.487	171.748	177.374
GSU0816		-0.12187	0.44027	0.687311	239.386	166.788	174.83	173.305	173.177	187.408
GSU0817		0.0897766	0.382766	0.647479	154.874	135.332	142.291	156.875	156.578	146.801
GSU0818		0.149832	0.29979	0.594962	120.007	132.863	165.562	151.242	162.965	150.089
GSU0819		0.306109	0.222909	0.547881	7.29216	12.1616	13.1272	14.0829	13.4474	12.8098
GSU0820	sppA	0.353437	0.0834495	0.49961	35.6398	44.5774	53.0258	55.5208	64.043	50.727
GSU0821		-0.11248	0.324679	0.608811	74.0323	69.8607	69.0967	69.0062	64.4633	63.5368
GSU0822		-0.153835	0.208195	0.54253	112.376	114.941	127.93	98.9217	103.335	117.082
GSU0823		0.0549446	0.624439	0.810536	68.2855	71.6438	68.6591	69.2623	70.0523	77.3715
GSU0824		0.237842	0.126965	0.49961	144.443	189.694	182.428	185.254	195.155	228.784
GSU0825		0.36709	0.0697196	0.49961	273.673	394.75	407.062	425.005	423.55	538.654
GSU0826		0.278906	0.171274	0.518902	233.204	360.505	394.293	383.738	412.96	402.144
GSU0827		-0.574169	0.00975204	0.49961	350.12	297.777	470.749	257.632	259.492	234.292
GSU0828		1.39512	0.105327	0.49961	12.218	16.7794	18.2587	14.8511	97.2832	12.2548
GSU0829		0.168609	0.392416	0.656363	20.2345	25.2834	29.0389	28.0378	32.1896	23.6128
GSU0830		0.0500525	0.788857	0.902778	73.8874	68.2148	79.1609	78.7789	92.6187	57.687
GSU0831		-0.471244	0.0560918	0.49961	8.83751	7.1781	7.23984	5.93189	6.51356	4.31265
GSU0832		0.0139709	0.956192	0.983012	16.8541	20.6656	22.5947	21.6365	25.508	13.5784
GSU0834		-0.0886539	0.753287	0.883402	3.62193	2.56034	2.54588	2.7739	3.44588	1.96418
GSU0835		-0.382958	0.226244	0.54845	1.54536	1.41733	0.994483	0.768158	1.21867	1.02479
GSU0836	rnk-2	-1.36757	0.0242448	0.49961	1.01414	1.41733	0.477352	0.256053	0.336184	0.512394
GSU0837		-0.940653	0.0111869	0.49961	2.75267	2.0117	2.18786	0.810834	1.34474	1.45178
GSU0841		-0.0310652	0.747451	0.881569	151.107	167.748	164.527	152.138	157.292	163.667
GSU0842		-0.104903	0.277655	0.582609	287.581	264.538	257.69	248.457	243.859	260.68
GSU0843		-0.00220861	0.983119	0.99522	179.31	166.605	159.634	169.379	155.485	179.893
GSU0844		-0.0764002	0.487256	0.724907	232.866	210.497	206.654	193.96	196.415	226.094
GSU0845		0.0820588	0.523346	0.74913	54.0875	50.7953	52.9463	53.0456	52.1505	61.8716
GSU0846	acnA	0.25585	0.0828599	0.49961	478.964	629.204	637.106	653.02	677.116	753.859
GSU0847		-0.277091	0.0953295	0.49961	127.733	89.7948	102.432	83.5159	89.2148	91.2915
GSU0848	frx-5	-0.490359	0.0427346	0.49961	44.1876	27.9809	29.5163	25.2212	21.7259	25.4062
GSU0849	scdA	-0.232927	0.396222	0.658807	98.3234	52.7156	54.3783	50.7838	56.3108	67.636
GSU0850		-0.130755	0.379167	0.644713	620.799	446.139	449.029	450.824	449.688	484.041
GSU0851		0.120297	0.405062	0.661154	63.3597	77.7246	80.9509	72.5483	82.5331	86.2957
GSU0852		-0.0606732	0.760611	0.887403	8.78922	6.17225	7.20006	6.52934	6.7657	7.9421
GSU0853		0.365388	0.143677	0.502666	360.503	367.272	386.814	677.217	383.418	375.243
GSU0854		-0.0365032	0.779008	0.898353	262.373	273.088	347.791	277.134	282.016	302.099
GSU0855		-0.266508	0.0496157	0.49961	427.098	351.727	327.424	304.703	308.281	306.625
GSU0856	htpX-1	0.245797	0.169467	0.517788	181.58	252.239	277.54	273.294	305.171	265.121
GSU0857		-0.0161039	0.906082	0.960905	26.4643	25.6034	26.0952	26.5015	27.8192	22.9723
GSU0858		0.0163491	0.883606	0.95132	128.023	122.622	130.556	119.705	121.909	143.94
GSU0859	galU	-0.151585	0.170652	0.518414	196.309	172.914	181.274	171.555	171.202	152.821
GSU0860	metF-1	0.287789	0.287834	0.585069	45.2983	89.7034	89.3046	95.337	94.6778	83.9045
GSU0861		0.45566	0.131392	0.49961	27.2852	54.8187	54.8557	64.3119	69.6321	53.9722
GSU0862	folD-2	0.0983864	0.341783	0.619065	323.849	375.501	383.831	393.681	398.126	367.856
GSU0863		0.0612886	0.642939	0.819656	73.163	88.5604	75.6603	74.3406	88.6685	84.6731
GSU0864		0.264023	0.272846	0.57864	22.794	37.0335	42.4048	40.8831	41.6448	40.3083
GSU0865		0.159345	0.173257	0.521581	65.7743	74.1585	68.858	79.419	77.0281	76.731
GSU0866		-0.0687962	0.522179	0.748506	273.818	232.671	231.118	244.36	232.135	226.734
GSU0867		0.126894	0.35884	0.630102	122.518	165.691	157.128	161.057	168.47	156.793
GSU0868		0.0482717	0.601608	0.797414	342.393	374.999	365.93	357.45	363.079	399.667
GSU0869		-0.221962	0.0315738	0.49961	601.675	689.646	632.531	532.76	549.871	566.878
GSU0870		-0.0655687	0.6455	0.820439	26.8506	25.9235	26.8113	25.2212	28.3235	22.5026
GSU0871		0.24528	0.338549	0.618081	62.587	109.729	124.708	121.198	125.733	105.254
GSU0872		0.153876	0.196873	0.531158	3435.96	4152.46	4264.38	4441.11	4612.99	4132.84
GSU0874		0.00612341	0.938079	0.976297	740.081	722.428	726.211	721.941	702.33	773.757
GSU0876		0.510899	0.0710146	0.49961	15.6467	29.261	26.8113	32.348	39.2074	30.7009
GSU0877		0.175967	0.400461	0.659433	31.535	45.2632	53.3839	46.943	52.0665	48.1223
GSU0878		0.244617	0.169525	0.517788	13.4253	17.5566	17.9007	18.1797	20.4652	19.3002
GSU0879	cheV	-0.0388374	0.835236	0.925235	26.1745	21.26	20.2079	20.4415	19.0364	26.3456
GSU0880		0.493568	0.0707877	0.49961	66.9333	129.663	123.555	143.347	148.677	158.842
GSU0881		0.263346	0.0515823	0.49961	168.154	212.097	209.16	240.732	230.034	236.726
GSU0882		0.580259	0.102691	0.49961	13.377	34.0617	27.9649	38.0238	41.0144	33.7753
GSU0883		0.0538017	0.584316	0.789553	170.231	160.616	157.685	176.591	172.714	157.775
GSU0884		0.242389	0.216942	0.544423	42.3525	46.4519	41.649	45.8334	43.2416	65.2448
GSU0885		0.136578	0.403409	0.660979	310.327	447.008	454.399	455.987	467.338	408.805
GSU0886		0.158006	0.247399	0.562049	172.839	216.212	226.145	212.396	243.481	230.577
GSU0887		-0.149461	0.164187	0.51437	131.549	141.642	130.715	127.898	122.329	113.922
GSU0888		-0.218389	0.358175	0.630102	6.32631	6.17225	5.33043	4.73698	6.55559	4.01375
GSU0889		0.4827	0.199923	0.534035	3.57364	8.54971	9.82549	9.5593	11.5143	9.69278
GSU0890	ligA	0.31444	0.112857	0.49961	134.35	200.072	214.967	232.24	238.186	212.857
GSU0891		0.245084	0.207575	0.54253	254.066	384.326	406.187	390.95	392.789	454.365
GSU0892	rep	0.0385644	0.79728	0.906275	121.649	163.405	169.659	167.074	156.199	143.812
GSU0893	prx-1	0.144665	0.159349	0.513677	298.447	283.375	276.586	305.087	300.885	342.962
GSU0894		-0.20864	0.119787	0.49961	295.598	232.991	252.678	233.349	236.8	205.897
GSU0895		0.0801692	0.541173	0.758541	112.087	110.872	104.461	109.676	102.452	133.991
GSU0896	tldD	0.121446	0.358355	0.630102	245.181	244.604	209.359	251.444	222.47	286.599
GSU0897		-0.0367894	0.840037	0.927777	86.6849	140.362	106.529	113.047	110.815	101.326
GSU0898	recQ	0.392274	0.0542647	0.49961	59.786	87.143	91.0549	96.0624	111.487	104.87
GSU0899		0.154827	0.318483	0.604007	53.9909	62.6826	66.2326	69.3049	75.9355	58.4129
GSU0900		0.271391	0.182041	0.523795	14.9707	20.8485	21.9184	20.8683	22.9866	25.8759
GSU0902		0.207405	0.354193	0.62775	2.36633	3.47475	2.86411	3.37136	3.61398	3.07436
GSU0903		0.312442	0.582164	0.78806	0.241462	0.457204	0.994483	0.384079	0.882483	0.896689
GSU0904		-0.0802994	0.674419	0.837929	5.84338	6.62945	7.83653	6.87075	6.68165	5.67903
GSU0905		0.114395	0.704581	0.853682	4.05656	6.49229	9.26858	6.52934	7.60616	7.38701
GSU0906	rpsU-1	-0.442246	0.0766345	0.49961	12.8458	9.82988	14.2012	7.38285	11.01	8.75339
GSU0907		0.288008	0.274719	0.58115	28.8306	25.832	25.419	28.3792	23.6589	45.7312
GSU0908		0.578424	0.0808744	0.49961	5.36046	6.49229	7.20006	8.10834	6.72368	13.6638
GSU0909		0.276494	0.230138	0.549962	59.0133	65.4716	67.3862	67.5552	60.1769	104.699
GSU0910		0.4584	0.0737649	0.49961	95.1361	108.357	103.943	118.723	108.335	195.393
GSU0911		0.549606	0.0263824	0.49961	27.1403	33.8331	30.3516	40.8831	35.7195	57.0892
GSU0912		0.326215	0.0376717	0.49961	18.2545	16.5051	18.4178	22.0205	21.5578	23.1004
GSU0913	uup	0.273928	0.230619	0.549962	147.92	247.896	265.447	266.039	286.723	246.888
GSU0914	rhlE-2	0.283078	0.41527	0.66602	102.911	231.345	279.33	244.445	286.597	215.761
GSU0915		-0.316507	0.0545522	0.49961	206.643	149.46	164.647	129.435	139.895	148.808
GSU0916	mcp40H-10	-0.0851681	0.585871	0.789659	21.2004	17.0994	18.5769	17.1982	16.7672	19.6418
GSU0917		0.531411	0.0623773	0.49961	3.8151	6.67518	6.9216	8.83382	8.11044	8.2837
GSU0918	metK-2	0.1182	0.279609	0.583107	269.327	268.744	272.767	276.11	274.452	329.512
GSU0919		-0.311207	0.421302	0.670109	314.915	218.589	179.087	154.784	115.059	304.405
GSU0921		-0.0728268	0.530831	0.752021	500.889	424.331	447.796	413.995	401.866	489.55
GSU0922		0.186583	0.26701	0.576542	280.434	348.206	361.793	340.337	454.563	332.33
GSU0923	lon-1	0.0263187	0.723571	0.8649	1477.17	1476.77	1447.77	1486.81	1480.05	1515.87
GSU0924		0.045553	0.629353	0.814305	298.399	297.182	279.688	284.091	296.178	323.064
GSU0925		0.174882	0.350429	0.627175	96.4883	147.403	149.809	150.218	137.205	157.091
GSU0926		0.10479	0.312084	0.601323	324.332	347.978	349.859	361.973	335.806	401.418
GSU0927		0.025487	0.778172	0.898353	793.3	703.957	766.468	742.766	737.503	823.801
GSU0928		8.7723861191279e-05	0.999275	0.999712	641.42	692.527	738.583	633.56	709.222	729.905
GSU0929		-0.317715	0.0790038	0.49961	7.19557	6.49229	7.47851	5.71851	5.75715	5.50823
GSU0930		0.11322	0.501258	0.732468	98.2751	127.926	99.8063	108.609	139.684	104.315
GSU0931		0.226471	0.129115	0.49961	54.6187	65.1058	71.0459	69.8597	76.9441	76.4321
GSU0932	uraA	0.335404	0.0549202	0.49961	62.7319	89.8405	83.6957	99.6472	101.191	97.3121
GSU0933	upp	0.312551	0.137085	0.501836	38.2959	60.2595	59.9474	62.7756	65.85	68.2765
GSU0934		-0.021006	0.833695	0.923832	213.066	208.119	194.242	188.156	202.383	215.974
GSU0935	mcp40H-20	0.274331	0.220452	0.545341	5.02241	7.26954	7.23984	6.99877	7.77425	8.88149
GSU0936		0.155012	0.272311	0.578493	18.0614	19.0654	19.293	21.6365	19.3306	21.8621
GSU0937	nifV	0.126746	0.596154	0.794872	2.51121	3.79479	3.69948	3.54206	4.2023	3.20246
GSU0938		0.0874151	0.634317	0.816381	3.57364	4.06911	3.81882	3.92614	4.49646	3.75755
GSU0939	glnK	-0.555491	0.0541592	0.49961	1.40048	1.41733	1.67073	1.10956	1.13462	0.81129
GSU0940	amtB	-0.0987706	0.601501	0.797414	5.84338	7.13238	8.23432	6.40132	6.59761	6.83192
GSU0941	gnfK	-0.226241	0.315704	0.602741	32.7906	30.6784	20.0886	20.8683	23.785	26.7299
GSU0942	hisN	0.0183573	0.884779	0.951971	55.3431	62.7284	62.732	62.9036	64.5473	55.6801
GSU0943		0.00562528	0.959562	0.98463	86.3469	90.1149	80.6327	84.8815	91.9883	81.2144
GSU0944	metC-1	-0.129759	0.45431	0.700472	330.9	474.76	526.957	393.553	419.515	405.005
GSU0945	metC-2	0.183974	0.292687	0.587305	351.086	499.861	530.616	514.197	578.152	477.209
GSU0946		0.0612967	0.702375	0.853682	388.802	501.827	550.148	520.726	556.132	426.525
GSU0947		0.0345571	0.87225	0.944518	15.8882	18.7454	25.5383	22.5326	21.5998	17.5495
GSU0948		-0.072794	0.68818	0.846473	15.8399	16.9623	21.4808	16.2167	19.6247	15.7988
GSU0949		0.570469	0.0837116	0.49961	3.62193	7.13238	8.03542	9.98606	8.99292	9.00959
GSU0950		0.255434	0.501907	0.732468	3.23559	7.4067	8.95035	8.79114	8.69876	5.97793
GSU0951		-0.108443	0.567326	0.776249	13.6185	19.3397	18.5372	14.5523	17.8177	15.4145
GSU0952		0.58735	0.0963948	0.49961	0.724386	1.28017	0.954704	1.32294	1.21867	1.92148
GSU0953		-0.0986588	0.694248	0.849619	17.6267	11.7959	9.18902	11.7784	12.2707	11.9559
GSU0954		-0.145419	0.408182	0.663	39.7447	30.1297	28.3627	29.7448	27.2309	31.8111
GSU0955		-0.589008	0.0752794	0.49961	199.351	163.679	90.5377	83.8999	123.422	94.1097
GSU0956		-0.328861	0.269851	0.577738	6.32631	4.43488	3.10279	3.32869	3.99218	3.67216
GSU0957		-0.500584	0.124643	0.49961	6.03655	5.25784	2.82433	3.37136	3.36184	3.20246
GSU0958		0.214621	0.383542	0.647948	1.06243	0.868687	0.994483	1.06689	1.21867	1.11019
GSU0959		0.190914	0.5126	0.740886	12.7492	9.05264	7.59785	13.4428	7.64818	12.4256
GSU0961		-0.195959	0.516635	0.744803	1.8834	1.78309	1.31272	1.23759	1.93306	1.15289
GSU0962		0.04049	0.764687	0.889147	60.2207	49.7895	49.8435	54.9233	51.6462	57.8151
GSU0963		-0.0624154	0.684139	0.843171	50.8036	49.7438	38.5859	45.364	41.5187	46.3289
GSU0964		-0.552405	0.0379332	0.49961	80.3586	51.664	47.6954	41.2672	35.6775	45.5604
GSU0966		0.133334	0.46635	0.708667	52.0109	46.4519	36.0401	48.8207	43.3677	55.2958
GSU0967		-0.435801	0.163044	0.51437	635.722	894.473	410.562	411.562	416.364	606.76
GSU0968		0.23289	0.0594522	0.49961	206.064	174.743	188.594	212.566	215.452	241.124
GSU0969	ctpA-1	-0.0146341	0.87404	0.945791	290.914	261.018	258.088	268.727	265.753	267.341
GSU0970		-0.0361585	0.780979	0.898353	35.9779	32.2329	33.5737	34.3537	34.3748	30.5301
GSU0971		-0.0433393	0.755057	0.883783	17.0472	19.0197	19.9294	18.5638	18.1539	17.6349
GSU0972		0.8794	0.123607	0.49961	84.4152	106.346	110.706	361.589	105.478	87.6193
GSU0973		-0.112801	0.517657	0.745001	20.476	27.1579	29.7947	24.3677	23.827	23.442
GSU0974		-0.278346	0.0925235	0.49961	55.1017	41.6513	45.3882	40.7977	37.3164	39.07
GSU0975		-0.0118255	0.948312	0.982399	219.441	315.608	367.123	294.247	299.372	301.288
GSU0976		-0.334647	0.058044	0.49961	59.7377	44.4859	51.0369	40.4137	38.1569	44.5356
GSU0977		-0.21321	0.314938	0.602707	30.2794	47.2292	43.9562	32.1773	32.2737	40.351
GSU0978		-0.228985	0.191761	0.52958	9.99653	11.4301	11.894	8.40706	10.2536	9.77818
GSU0979		-0.455526	0.00776596	0.49961	65.2914	54.8187	55.0148	40.9684	42.4012	44.3221
GSU0980		0.215262	0.260623	0.572612	39.31	56.8762	56.6458	55.1367	55.8065	66.5258
GSU0981		-0.0919156	0.537538	0.756598	42.111	52.9442	51.5142	43.8277	43.2837	50.4281
GSU0982		-0.296682	0.103883	0.49961	69.0099	104.288	82.383	67.854	69.2119	71.0946
GSU0983		-0.0480254	0.741089	0.878044	21.8282	25.1005	27.6069	24.0263	23.1126	24.9792
GSU0985		-0.0394426	0.865487	0.941222	1.15902	1.28017	1.39228	1.36561	1.26069	1.11019
GSU0986		-0.369924	0.0843398	0.49961	16.4194	13.1217	12.1725	11.6931	8.99292	11.5716
GSU0987		0.276345	0.316726	0.602741	85.5259	150.832	180.837	152.992	194.482	157.945
GSU0988		0.148156	0.451887	0.698974	53.2665	81.8395	87.5941	82.449	81.5246	82.8797
GSU0989		0.125492	0.510811	0.740204	46.5056	67.0718	73.7509	73.4871	65.85	65.074
GSU0990		0.0539422	0.672396	0.836958	128.458	154.718	169.301	163.575	156.956	149.235
GSU0991		0.133538	0.379669	0.644713	73.0664	90.7092	94.4759	101.653	82.197	99.4898
GSU0992		-0.519617	0.0281355	0.49961	109.672	169.394	103.506	89.8318	86.3152	90.6937
GSU0993		0.162193	0.407925	0.663	10.238	11.2472	13.0874	14.5523	13.6995	10.4614
GSU0994	fumB	0.163053	0.304835	0.598999	812.327	883.455	700.196	817.534	781.249	1083.84
GSU0996		0.158189	0.413351	0.665716	60.7036	45.2175	44.9506	49.7596	51.184	67.3798
GSU0997	mutM	0.377328	0.164155	0.51437	28.5408	54.9102	53.2645	60.8125	62.4462	54.3991
GSU0998	dnaB	-0.081867	0.390554	0.654866	466.215	482.624	529.741	482.489	479.188	435.364
GSU0999	lpxA-2	-0.00724279	0.93552	0.976044	411.355	395.436	449.506	401.96	418.087	429.984
GSU1000		0.232422	0.175778	0.522423	325.684	453.135	475.522	501.095	533.902	438.695
GSU1001		0.272931	0.481008	0.719471	41.29	29.1696	17.8211	28.0804	25.9702	52.5204
GSU1002		-0.137096	0.338735	0.618081	267.782	216.303	190.821	197.886	206.123	209.654
GSU1003	gnfM	-0.13832	0.214935	0.544423	459.358	378.885	390.832	383.055	381.737	351.886
GSU1004	gnfL	0.00605355	0.957576	0.98411	198.047	237.38	241.58	223.278	215.83	240.782
GSU1005	nifR3	0.0827043	0.48841	0.725326	112.956	129.892	142.291	139.762	138.55	129.593
GSU1006		0.185577	0.425181	0.674469	72.3904	120.427	134.176	128.923	131.658	111.403
GSU1007		0.194616	0.29849	0.594755	181.386	122.988	132.545	163.02	145.61	191.336
GSU1008	fabI	0.118261	0.498257	0.731162	108.368	107.489	103.227	144.883	109.008	92.4444
GSU1009		0.280835	0.0911436	0.49961	165.788	204.05	234.499	251.358	219.738	263.2
GSU1010		0.722364	0.093831	0.49961	121.262	106.849	106.847	115.864	119.85	316.916
GSU1011		-0.201833	0.169875	0.518073	138.986	106.666	105.017	101.866	104.217	98.7639
GSU1012		-0.156301	0.197349	0.531158	49.2583	48.0978	49.7639	44.1264	44.3342	43.5535
GSU1013		-0.76153	0.0391264	0.49961	344.953	227.779	590.405	233.776	216.334	236.085
GSU1014		0.493019	0.00703722	0.49961	74.3703	95.2813	91.4527	109.164	128.674	129.678
GSU1015		0.247861	0.174603	0.521754	46.3124	62.8655	66.7099	66.6164	65.1776	77.1153
GSU1016		0.195528	0.126976	0.49961	108.803	110.415	105.216	114.754	115.899	140.866
GSU1017		0.0735943	0.552088	0.766555	58.8202	61.9511	69.2956	63.0743	67.3208	69.6429
GSU1018		0.553161	0.275382	0.581822	175.495	111.192	55.7706	133.446	101.612	267.171
GSU1019	pbuG	0.104253	0.420548	0.66954	139.951	129.663	114.445	129.648	129.011	154.145
GSU1021		-0.0567566	0.740623	0.878044	29.2652	21.8543	20.725	22.7887	23.3648	22.8869
GSU1023	glgA-1	0.0701234	0.511462	0.740466	348.43	355.705	365.294	409.684	383.166	329.854
GSU1024	ppcD	0.0535747	0.828403	0.92069	75.8191	50.9782	57.6402	50.0156	55.9746	85.399
GSU1025		-0.32013	0.0479088	0.49961	46.2159	38.8166	37.3528	31.2384	32.4838	34.2877
GSU1026		0.0531888	0.614978	0.80691	120.2	126.234	142.609	135.409	135.398	132.881
GSU1027	aguB	0.115544	0.432381	0.681045	272.659	383.365	379.495	374.392	384.804	362.732
GSU1028	aguA	0.317345	0.195457	0.529809	235.377	395.253	438.567	460.682	487.256	384.466
GSU1029	mcp40H-4	0.324131	0.181928	0.523795	4.10486	4.4806	6.08624	5.59048	7.26998	5.55093
GSU1030	mcp40H-5	0.019506	0.95511	0.983012	0.627802	0.411483	0.397793	0.46943	0.42023	0.555093
GSU1032	mcp40H-6	0.329547	0.329692	0.612182	0.531217	0.502924	0.676249	0.597456	0.630345	0.939389
GSU1033	mcp40H-7	0.0574798	0.583512	0.789553	134.398	146.259	145.035	154.229	153.762	135.016
GSU1034	mcp40H-8	0.372267	0.131273	0.49961	18.5926	30.2669	28.0046	37.0423	35.6355	26.858
GSU1035	mcp40H-9	0.132583	0.540573	0.758242	17.9648	25.9692	24.703	26.7575	28.8278	19.6845
GSU1036		-0.00608118	0.962116	0.984641	42.2076	36.4849	38.387	40.7977	37.7366	38.0452
GSU1037		-0.413575	0.62182	0.809879	37.9096	7.54386	7.35917	5.46246	7.48009	26.6018
GSU1038		-0.171187	0.558319	0.769371	56.2124	53.6757	110.547	62.1781	61.0594	72.6318
GSU1039		0.275089	0.190306	0.527723	36.6057	31.3185	28.6013	34.0123	33.6604	49.1044
GSU1041	mcp40H-25	-0.0498545	0.798882	0.906275	30.2311	23.3174	21.8786	22.874	20.9695	28.993
GSU1042		0.14004	0.591304	0.791221	12.3146	7.04094	8.55255	9.68733	8.61471	12.4256
GSU1043		0.0278503	0.831429	0.922837	148.161	128.383	110.945	139.079	129.179	126.732
GSU1044	nudC	-0.354715	0.314929	0.602707	461.627	185.442	203.034	237.489	213.645	213.54
GSU1045		0.345267	0.0506826	0.49961	78.6684	102.322	105.654	108.865	119.387	135.955
GSU1046		0.154659	0.201405	0.536443	84.6083	84.5827	76.4956	86.0337	88.2903	99.1482
GSU1047		0.472681	0.116668	0.49961	31.1003	62.1797	63.9652	69.3903	67.3208	81.5987
GSU1048		0.221422	0.0701782	0.49961	69.7343	80.0107	77.2117	88.2102	89.0467	87.3632
GSU1049		0.0679249	0.697825	0.852252	15.1638	15.2249	17.4233	15.1498	15.0022	19.9834
GSU1050		-0.145219	0.481354	0.719471	7.91996	9.8756	10.8598	9.34592	9.49719	7.08811
GSU1051		-0.241246	0.156473	0.512457	27.4301	22.7687	20.2079	20.1855	19.6247	19.7272
GSU1052		0.205781	0.352828	0.62775	10.8658	9.32696	10.7006	9.17522	11.4723	14.9875
GSU1053		-0.0885402	0.53408	0.755341	27.8647	27.3408	27.2488	26.1601	22.7765	28.6087
GSU1054	tusA-2	-0.307523	0.136782	0.501836	16.3228	11.1101	11.8542	10.4555	10.5057	10.7603
GSU1055		0.411871	0.106202	0.49961	24.6774	44.806	41.1716	48.8634	45.721	52.6912
GSU1056		0.034796	0.798453	0.906275	38.0061	32.6444	33.6931	35.634	32.946	38.3014
GSU1057		-0.181217	0.31797	0.603712	39.4066	30.7698	28.2035	25.4346	30.2145	31.0852
GSU1058	sucC	0.148132	0.308334	0.60029	114.308	88.4689	94.277	103.061	103.755	122.334
GSU1059	sucD	0.207416	0.242289	0.557111	62.7319	53.8129	58.3563	58.5934	60.5971	82.7516
GSU1060		-0.0961282	0.685975	0.844557	143.911	107.489	88.5488	93.5019	87.9541	136.51
GSU1061		0.285227	0.0819398	0.49961	124.788	174.606	169.181	194.472	197.34	179.252
GSU1062		-0.00238186	0.987997	0.997117	29.555	34.1531	31.9826	36.5729	32.0215	26.9434
GSU1063	pilV-1	-0.434556	0.0884854	0.49961	14.6809	14.9048	24.4245	13.2721	13.2372	13.493
GSU1064	pilW-1	-0.00686898	0.974485	0.990824	34.8671	43.3886	48.849	49.8449	45.0066	31.683
GSU1065	pilX-1	-0.114023	0.484257	0.721282	24.1945	19.1568	19.8897	20.6122	17.3975	20.4104
GSU1066	pilY1-1	0.232177	0.313316	0.601764	115.564	140.499	132.306	125.252	208.35	122.59
GSU1067		0.0418999	0.694939	0.849619	66.0158	66.5689	69.4547	68.7075	68.4554	70.8384
GSU1068	aplA	0.12285	0.46833	0.710346	115.515	150.1	147.621	150.004	175.572	124.426
GSU1069		-0.191449	0.33577	0.616339	21.8765	21.26	15.4344	15.6192	19.6247	16.0123
GSU1070	aplB	0.257264	0.124278	0.49961	132.128	145.208	138.79	150.687	142.752	203.933
GSU1071		-0.0367945	0.856948	0.937248	52.2524	35.479	34.6478	37.8531	35.8876	45.5177
GSU1072		-0.181844	0.297789	0.59452	11.7834	11.6587	10.3028	9.13255	9.20303	11.4008
GSU1073		-0.088101	0.604523	0.800077	45.4432	31.5471	34.8069	36.3595	34.3328	34.4585
GSU1074		-0.185774	0.0559286	0.49961	308.927	301.755	288.639	259.637	262.686	268.324
GSU1075	ruvC	-0.0581469	0.727545	0.867497	112.908	138.578	176.103	134.385	140.735	135.656
GSU1076	ruvA	-0.135365	0.219455	0.545341	129.086	111.695	121.287	112.236	105.142	112.257
GSU1077	ruvB	-0.000245154	0.997892	0.999712	172.452	189.237	175.785	181.157	173.429	182.797
GSU1078	hda	0.0430325	0.741598	0.878044	36.3159	33.0101	34.2102	38.2372	35.5935	32.8359
GSU1079		-0.558437	0.0815432	0.49961	355.046	172.274	176.501	175.951	148.929	152.95
GSU1080		4.46481	0.0401387	0.49961	0.338047	1.37161	0.517131	48.4366	0.672368	0.298896
GSU1081		0.0567764	0.805784	0.911599	17.0955	24.7804	30.1527	23.9409	28.6597	22.3745
GSU1082		-0.17478	0.417622	0.66772	8.35459	6.85806	7.04094	7.89496	6.59761	5.20934
GSU1083		-1.20474	0.0857634	0.49961	70.6035	14.0819	14.6786	14.2536	13.1532	15.628
GSU1084		0.387348	0.217214	0.544423	3.57364	7.13238	6.84204	6.14527	8.36257	8.4972
GSU1085		0.301175	0.179808	0.523795	2.99413	3.10899	2.82433	4.31022	3.69802	2.98896
GSU1086		0.346622	0.104924	0.49961	2.84925	3.01755	3.4608	3.75544	4.45444	3.67216
GSU1087		-0.0811374	0.517949	0.745074	164.484	132.178	136.204	137.074	126.573	145.52
GSU1088		-0.155276	0.141341	0.501836	378.613	417.884	367.084	335.899	334.251	374.688
GSU1089		0.160392	0.100189	0.49961	287.581	321.963	304.312	335.642	335.806	349.88
GSU1090		-0.00125627	0.992676	0.998817	240.786	189.648	204.744	191.015	240.245	203.335
GSU1091		0.0741306	0.506612	0.7357	1187.41	1400.87	1499.48	1352.68	1444.92	1505.75
GSU1092		0.0419327	0.900585	0.959253	1.15902	1.69165	2.14808	1.19491	1.76497	2.22037
GSU1093		0.444172	0.143306	0.502662	1.35219	1.73737	2.3072	2.0911	2.26924	3.03166
GSU1096	pstB	-0.425838	0.259244	0.572475	0.917556	2.33174	1.59117	1.06689	1.30271	1.23829
GSU1097	pstA	0.0818268	0.817331	0.916186	0.531217	0.731526	1.11382	1.02421	0.714391	0.81129
GSU1098	pstC	0.192298	0.496745	0.730813	0.724386	0.914408	0.914924	1.10956	1.05057	0.768591
GSU1099	pstS	-0.138575	0.612603	0.806391	1.69024	2.60606	2.18786	1.66434	2.47936	1.75068
GSU1101	phoR	0.0478537	0.752815	0.883402	34.5774	40.7826	44.9904	38.7493	40.3	45.3896
GSU1102	phoB	-0.239403	0.185408	0.524054	16.516	12.2073	13.2465	11.9065	12.2707	11.3581
GSU1103		-0.0952677	0.372163	0.640272	477.757	473.617	456.746	478.947	453.092	386.089
GSU1104		-0.21879	0.30031	0.595213	7.19557	6.76662	8.59233	6.91342	7.26998	5.20934
GSU1105		-0.217037	0.116494	0.49961	533.004	429.177	402.567	402.43	406.782	364.867
GSU1106	gltA	-0.253807	0.123413	0.49961	7350.49	6074.59	5414.36	4774.66	4944.21	6081.35
GSU1107		-0.19199	0.329428	0.612028	37.1369	27.9352	24.703	25.4346	23.9111	29.2064
GSU1108		-0.372071	0.0777359	0.49961	505.332	395.618	333.231	285.541	285.378	382.63
GSU1110	ndk	-0.211298	0.236422	0.554449	445.739	343.36	296.555	328.9	336.94	271.825
GSU1111	rlmN	-0.226283	0.116467	0.49961	277.054	283.969	254.15	250.249	253.735	192.831
GSU1112	mtaP	-0.127957	0.242672	0.557111	236.391	222.155	215.286	204.117	223.73	188.774
GSU1113		-0.204563	0.176264	0.522423	216.157	178.035	174.989	170.488	182.758	140.652
GSU1114		-0.283848	0.0809671	0.49961	163.566	122.348	119.736	115.437	111.823	105.895
GSU1115		-0.147036	0.121078	0.49961	230.451	218.406	222.963	203.477	205.03	198.211
GSU1116		-0.221762	0.0330192	0.49961	718.205	676.982	619.881	590.842	578.53	558.552
GSU1117		-0.329876	0.0668073	0.49961	336.502	230.385	240.824	223.577	213.435	205.555
GSU1118	usp-2	-0.168252	0.331606	0.614374	702.365	473.114	467.606	485.476	472.296	504.366
GSU1119		-0.135266	0.372752	0.640436	382.862	268.607	285.337	278.884	277.226	296.804
GSU1120		-0.218278	0.206514	0.542167	106.34	74.2499	79.1211	72.847	70.3465	80.0188
GSU1121		0.0545749	0.606503	0.80068	301.103	360.962	366.129	349.597	350.976	367.301
GSU1122	yhaM	0.0474883	0.587826	0.790331	273.432	267.967	266.72	292.37	270.964	271.825
GSU1123	ycbL	0.0356967	0.682345	0.8425	210.603	203.41	214.053	217.218	210.913	215.675
GSU1124	coaBC	0.084374	0.363539	0.633188	290.817	303.126	278.217	304.361	295.842	324.473
GSU1125		-0.278491	0.0546125	0.49961	81.2762	66.7975	69.4945	62.3915	57.5295	59.4377
GSU1126		0.203381	0.193194	0.529809	45.0568	57.0133	45.5075	60.0017	58.0758	51.8372
GSU1127		0.304893	0.203181	0.538665	8.98239	15.7735	14.3603	15.8753	16.3469	16.1404
GSU1128		-0.0213893	0.880291	0.949297	62.5387	74.3413	78.047	65.9763	66.5224	79.2929
GSU1129		-0.0796231	0.482118	0.719974	426.857	354.424	337.925	362.144	348.749	348.172
GSU1130		-0.123039	0.143062	0.502662	429.658	419.439	425.042	392.913	394.05	383.014
GSU1131		0.685775	0.208517	0.54253	32.4525	32.6901	29.2776	98.495	28.6597	24.723
GSU1132	ftsY	-0.106569	0.327359	0.61008	209.01	177.075	178.092	177.53	176.076	170.371
GSU1133	zapB	-0.196697	0.443991	0.691199	11.5419	6.21797	8.91057	7.16948	8.74078	7.34431
GSU1134	zapA	-0.175147	0.226126	0.54845	89.6307	69.1749	70.6879	67.7686	67.7831	67.6787
GSU1135		-0.210875	0.101336	0.49961	344.905	289.776	284.502	288.827	256.13	249.194
GSU1136		-0.214935	0.133954	0.500214	245.277	193.946	186.724	189.564	181.077	168.62
GSU1137	rny	-0.240677	0.0461939	0.49961	858.784	723.571	684.722	632.194	649.591	636.906
GSU1138		-0.270074	0.0526669	0.49961	400.006	316.065	308.966	281.914	283.403	284.677
GSU1139	tyrS	-0.208013	0.0646513	0.49961	1038.92	864.71	872.361	808.785	822.936	771.494
GSU1140	mcp34H-3	-0.272603	0.159207	0.513677	22.1662	15.0877	19.4521	16.3447	14.7921	15.7988
GSU1141	mcp34H-10	-0.111498	0.448344	0.695322	21.8765	19.9341	18.4178	19.5454	17.2294	18.9586
GSU1142	cheW34H-1	-0.186899	0.393248	0.65688	12.0248	11.0186	9.90505	7.42553	11.9345	9.56469
GSU1143	cheR34H	-0.106479	0.586722	0.789728	10.9624	8.59543	9.50726	10.1994	7.35402	9.43659
GSU1144	cheD34H	-0.182395	0.334511	0.615294	5.21558	4.66348	5.29065	4.48092	4.95871	3.92835
GSU1145	cheB34H	-0.0822877	0.598212	0.796167	17.9165	14.4934	15.1559	13.9549	15.7586	15.201
GSU1146		0.243673	0.11771	0.49961	40.4691	32.37	36.239	45.108	39.5857	44.4502
GSU1147		0.113687	0.420034	0.669346	18.2545	18.1053	19.4521	19.2466	19.2465	21.9048
GSU1148		0.0967356	0.598337	0.796167	43.8495	32.6444	35.1649	40.4137	33.2402	45.7312
GSU1149		-0.204679	0.138274	0.501836	413.431	330.421	312.387	296.68	295.884	323.918
GSU1150	hpnJ	-0.248154	0.019957	0.49961	991.926	1122.3	971.133	874.633	859.202	863.939
GSU1151	hpnK	-0.2134	0.0790692	0.49961	268.844	262.298	319.746	240.69	240.287	252.952
GSU1152		-0.277139	0.0554265	0.49961	124.594	97.3387	103.824	86.5031	89.3409	92.9568
GSU1153		-0.232553	0.225432	0.54845	30.9072	26.0149	23.43	20.9536	20.2551	27.1569
GSU1154		0.0461315	0.675869	0.838513	120.683	147.723	139.983	141.853	139.558	140.268
GSU1155		-0.250059	0.327475	0.61008	61.9592	33.6502	37.0743	40.627	36.1818	34.7147
GSU1156	asnS	0.0571799	0.694799	0.849619	64.4221	77.3132	87.3156	74.1273	79.2133	85.0147
GSU1157		0.130776	0.574774	0.782138	4.24973	6.58373	5.13153	4.82233	6.42952	6.23413
GSU1158	sodA	-0.120702	0.395726	0.658807	3604.11	2803.76	2650.77	2841.76	2958.29	2531.48
GSU1159		0.50411	0.131965	0.49961	70.5552	105.706	113.809	154.528	175.32	81.6414
GSU1160		-0.0270586	0.904832	0.960905	185.057	164.502	167.471	194.259	202.593	110.549
GSU1161		0.490198	0.125824	0.49961	92.142	174.149	162.18	226.777	237.43	137.749
GSU1162		0.252056	0.110967	0.49961	43.5598	56.4189	47.4965	60.7272	60.8493	54.0576
GSU1163		-0.0207647	0.850307	0.934257	83.3527	73.9299	80.6327	80.742	78.8771	74.8949
GSU1164		0.13825	0.392724	0.656552	37.1369	46.6348	44.4733	48.9061	51.6883	40.5645
GSU1165	ptsP	0.0200707	0.820668	0.916695	280.724	278.529	271.056	295.229	279.747	266.957
GSU1166		0.0975413	0.293398	0.587842	286.278	315.699	319.269	325.528	336.688	323.491
GSU1167		-0.164304	0.341844	0.619065	170.617	120.93	114.883	117.528	116.782	128.312
GSU1168		0.086077	0.554186	0.766555	23.4701	23.1802	27.3682	26.2881	24.0792	28.2244
GSU1169		-0.113234	0.40528	0.661154	44.3807	39.2738	41.2114	34.8658	40.216	40.351
GSU1171	yyaL	0.195275	0.208332	0.54253	34.9637	36.4391	34.0511	34.9939	39.6697	46.0727
GSU1172	mviN	0.305639	0.227168	0.548573	73.5494	82.9825	73.8702	74.4687	76.3558	133.948
GSU1173	ogt	0.213072	0.164883	0.515095	29.6998	37.765	37.0743	40.371	39.7117	41.1196
GSU1174	mazG	-0.0337235	0.764659	0.889147	52.1075	54.0415	52.1905	51.5946	52.5287	50.5562
GSU1175	tgt-1	-0.150633	0.227777	0.548573	189.113	157.324	178.251	170.318	159.813	142.531
GSU1176	frdC	-0.0970687	0.552216	0.766555	5752.35	4162.2	3998.26	4174.04	4022.02	4811.38
GSU1177	frdA	-0.0387588	0.762074	0.888046	14857	13032.4	12106.3	12051.5	12236.8	14647.2
GSU1178	frdB	-0.0213413	0.859672	0.938431	3788.25	3578.95	3192.45	3201.81	3245.27	3957.47
GSU1179		-0.00344302	0.971897	0.989859	145.65	136.978	133.539	132.635	136.323	146.203
GSU1180	ftsH-1	-0.0457578	0.606315	0.80068	299.51	274.551	273.642	273.592	275.377	272.252
GSU1181		-0.0535941	0.832024	0.923194	22.3111	14.4019	11.9736	15.8326	17.1874	13.8346
GSU1182	malQ	0.275786	0.207349	0.54242	136.233	111.375	116.951	122.863	195.911	122.548
GSU1183	metY-1	-0.00453911	0.960891	0.984641	3840.79	4151.32	4266.61	3909.8	3956.67	4353.77
GSU1184	acpH	-0.0336261	0.67372	0.837682	1222.76	1325.34	1336.23	1260.29	1250.94	1283.63
GSU1185		-0.0884431	0.684102	0.843171	19.0755	11.7044	12.8089	13.3574	14.4979	13.1087
GSU1188		0.306475	0.185269	0.524054	36.7988	59.7108	62.8116	60.8979	72.3216	63.8784
GSU1189		-0.0100541	0.948181	0.982399	63.6494	78.2276	87.1167	70.2011	72.7418	84.5023
GSU1190	selU	0.0608284	0.593368	0.79224	98.9512	116.861	109.473	105.451	114.723	119.132
GSU1192		-0.209309	0.0821427	0.49961	92.142	85.9543	88.9863	76.3464	82.0289	72.6318
GSU1193		0.0592081	0.489154	0.725981	1562.07	1733.26	1741.94	1725.84	1791.4	1731.08
GSU1194		0.524418	0.146882	0.503229	25.0155	50.9325	58.953	72.7617	74.1285	47.2683
GSU1195		0.141001	0.529009	0.751542	48.1476	62.9112	69.0569	74.0419	76.1036	48.5066
GSU1196		0.0864963	0.550751	0.766184	13.377	11.933	12.2918	13.9549	13.0271	12.9379
GSU1197		-0.105939	0.411678	0.665447	38.1993	38.2222	36.239	32.6467	37.4425	34.5866
GSU1198	serA	-0.055659	0.465111	0.708545	1193.4	1236.92	1247.28	1162.69	1202.7	1173.04
GSU1199		-1.08342	0.118602	0.49961	31.3418	35.9362	168.863	39.2187	40.5522	31.7684
GSU1200		0.123458	0.26498	0.574605	892.444	986.874	1043.49	1115.28	1122.31	946.391
GSU1201	greB	0.057384	0.607821	0.801868	408.312	484.453	503.01	497.297	508.478	446.679
GSU1202		0.248332	0.173717	0.521581	201.766	313.87	301.408	324.803	328.788	317.001
GSU1203		-0.137907	0.266436	0.576542	390.879	326.489	299.18	311.061	298.069	314.695
GSU1204		-0.00754681	0.933439	0.974174	303.711	290.324	269.187	289.169	281.26	288.264
GSU1205		-0.129409	0.377384	0.643672	48.1476	41.6055	39.3815	37.341	37.5685	43.1265
GSU1206		0.15725	0.223205	0.547881	56.5987	65.7002	64.2436	66.4457	74.1285	67.4652
GSU1207		-0.285433	0.0709512	0.49961	120.441	97.8873	98.0958	85.6923	77.3223	96.5862
GSU1208		0.186745	0.219765	0.545341	63.3114	88.1032	74.0691	84.1133	85.0965	87.4486
GSU1209		0.226839	0.276862	0.582266	46.0227	38.7709	41.4103	42.4194	41.5607	63.7076
GSU1210		0.208384	0.343551	0.620822	240.931	243.37	238.676	214.145	381.022	240.142
GSU1211		0.123775	0.514971	0.743357	35.7847	43.5258	56.6458	46.6016	49.6712	51.9226
GSU1212		0.0944228	0.715976	0.860703	129.617	82.7996	88.6283	92.6911	84.3821	144.282
GSU1213		0.0234978	0.927578	0.972564	195.971	107.58	113.451	124.484	127.708	171.567
GSU1214		0.0948072	0.593423	0.79224	53.0734	83.6226	70.0514	74.2126	73.3721	73.2296
GSU1215	cydD	0.415403	0.169013	0.517455	26.416	57.2876	53.7419	65.0801	58.9582	59.3523
GSU1216	cydC	0.234778	0.214253	0.544423	59.4963	92.0351	89.1057	97.9402	92.2825	92.9995
GSU1217		-0.344879	0.220723	0.545341	8.59605	5.71505	4.89286	4.6943	4.37039	6.02063
GSU1218		0.0250057	0.868031	0.941763	30.7623	37.3535	36.955	37.2557	38.2409	31.4268
GSU1219	gltX	-0.0351736	0.67646	0.838612	413.238	375.136	391.906	378.019	391.066	382.758
GSU1220		-0.185565	0.122428	0.49961	120.731	100.585	107.484	96.5746	95.8544	96.6716
GSU1221		-0.137545	0.589671	0.790803	1.73853	1.96598	1.63095	1.40829	1.38676	2.04958
GSU1222		-0.136485	0.245353	0.560521	143.863	127.88	126.538	131.227	111.739	119.345
GSU1223		0.126794	0.288197	0.585069	106.533	129.572	128.766	136.946	133.633	127.842
GSU1224		-0.00904476	0.916857	0.966159	263.677	254.48	246.314	253.706	247.641	258.332
GSU1225		-0.167889	0.282079	0.583107	137.489	103.328	101.557	104	93.4171	107.304
GSU1227		-0.27815	0.0998063	0.49961	247.257	183.247	171.648	165.623	158.805	172.079
GSU1228	omcI	-0.0837706	0.426807	0.675361	281.159	245.564	245.001	234.331	235.119	258.716
GSU1229		-0.0314237	0.736662	0.874657	387.354	357.625	334.823	364.278	340.512	351.716
GSU1230		0.0372576	0.689017	0.847016	161.007	173.555	161.066	174.287	163.764	170.542
GSU1231		-0.188824	0.264043	0.573682	99.6756	75.7129	70.1309	76.3891	72.8258	66.1415
GSU1232		-0.561538	0.103775	0.49961	266.236	130.806	111.899	115.309	113.546	115.886
GSU1233		-0.0490438	0.703752	0.853682	77.8474	67.5747	67.0679	65.1654	64.8415	75.3646
GSU1234		-0.120409	0.281561	0.583107	70.845	67.2547	66.9486	63.1597	62.9504	62.512
GSU1235		-0.331285	0.0490103	0.49961	13.6668	15.4078	14.8775	11.1383	12.4808	11.3154
GSU1236		-0.425874	0.0413409	0.49961	13.5702	13.8076	12.3316	11.2236	10.2956	8.0275
GSU1237		-0.258838	0.371935	0.640207	7.29216	11.1101	8.31388	9.30325	8.02639	4.99584
GSU1238		0.199986	0.639274	0.817953	2.36633	4.4806	3.38124	6.05991	3.656	2.04958
GSU1239		-0.269411	0.448442	0.695322	12.8458	15.9107	18.2985	16.4301	15.9687	6.66112
GSU1240		0.0205113	0.866385	0.941222	48.4856	49.378	55.6513	53.3016	50.7638	51.6664
GSU1241		-0.252612	0.108204	0.49961	34.2393	27.2036	30.1129	25.4772	26.9367	24.4241
GSU1242		-0.105699	0.306014	0.598999	2309.73	1986.55	1891.23	1894.58	1941.21	1914.56
GSU1243	coaD	-0.213027	0.0556811	0.49961	156.178	143.333	143.524	130.416	130.734	121.053
GSU1244		0.0737096	0.614192	0.8068	43.1251	50.6125	51.9518	47.9245	47.8222	57.6016
GSU1245		-0.127555	0.195403	0.529809	225.622	211.868	215.405	196.307	190.826	210.508
GSU1246		0.0403138	0.719483	0.861999	101.704	105.294	108.001	115.65	111.655	96.6289
GSU1247		0.25557	0.029138	0.49961	272.176	281.089	250.888	315.628	301.053	343.304
GSU1249		-0.378941	0.0592131	0.49961	128.12	91.2579	132.982	86.9726	81.2304	102.778
GSU1250		0.242778	0.128519	0.49961	110.879	92.1266	87.0372	99.0924	127.792	116.271
GSU1251		0.440597	0.0161549	0.49961	1475.96	1684.38	1675.54	1982.49	1907.8	2672.86
GSU1252		0.370145	0.01553	0.49961	1198.86	1322.42	1364.87	1564.4	1507.91	1950.51
GSU1253		0.465195	0.0186025	0.49961	186.602	227.596	216.718	267.66	248.104	355.26
GSU1254		0.457559	0.0442279	0.49961	70.7967	90.8921	89.8615	101.354	96.989	147.142
GSU1255		0.138506	0.527263	0.750886	71.3762	54.3615	57.6005	60.0017	53.9155	87.8755
GSU1256		0.236678	0.27671	0.582266	30.5691	24.7804	28.6013	30.0435	26.3484	42.5287
GSU1257		0.206123	0.209856	0.544333	155.936	152.523	149.332	161.441	148.761	217.895
GSU1258		-0.14613	0.200321	0.534035	173.949	146.854	148.934	144.499	136.196	143.769
GSU1259		-0.198692	0.361364	0.631634	52.1075	31.9128	33.1362	34.7805	33.8705	33.391
GSU1260		-0.0931131	0.354445	0.62775	313.852	283.146	282.911	272.824	259.324	292.748
GSU1261		0.0275093	0.806127	0.911599	96.44	110.278	97.7776	106.049	96.1066	108.201
GSU1262		0.0939817	0.456455	0.701651	127.444	126.371	129.442	158.326	127.078	123.658
GSU1263	yhbY	0.0040805	0.968687	0.988923	83.9322	90.3892	93.4416	88.2955	92.4506	87.7901
GSU1264		0.018533	0.955017	0.983012	0.917556	1.87454	1.71051	1.66434	1.72294	1.19559
GSU1265		0.097378	0.640964	0.818934	8.64434	8.09251	11.1382	11.6504	9.8754	8.3264
GSU1266	lepA	-0.243121	0.0175797	0.49961	574.1	544.941	539.209	459.743	492.509	448.814
GSU1267	lepB	-0.245749	0.0630759	0.49961	335.005	267.967	278.853	233.776	250.079	259.826
GSU1268		0.0947561	0.772804	0.893347	1.2556	0.822967	0.875145	0.725483	1.30271	1.11019
GSU1269		-0.0611274	0.735605	0.874017	6.95411	7.08666	7.04094	7.51088	7.10188	5.59363
GSU1270	pyrR	-0.00513677	0.974956	0.990824	80.6966	100.448	92.8052	84.7961	78.2888	109.908
GSU1271	pyrB	0.51433	0.150669	0.505121	209.782	238.523	246.751	231.088	228.941	532.804
GSU1272	pyrC	0.261635	0.128435	0.49961	243.104	353.327	347.313	367.009	357.027	407.439
GSU1273	carA	0.0806065	0.387676	0.651992	387.981	440.059	445.767	445.361	441.073	460.599
GSU1274		0.19875	0.243034	0.557111	291.203	300.429	295.242	291.132	297.06	429.685
GSU1275		-0.480967	0.0606897	0.49961	107.257	64.4657	63.9254	58.4654	50.8058	59.5231
GSU1276	carB	-0.0392668	0.618859	0.809148	1200.6	1309.43	1221.58	1200.89	1218.2	1212.32
GSU1277	greA	-0.126089	0.189963	0.527639	232.142	226.042	220.656	210.518	214.611	196.887
GSU1278		-1.05503	0.0361983	0.49961	80.8415	185.259	52.5087	49.1621	53.7894	50.3427
GSU1279	nikMN	0.251063	0.168548	0.517455	98.9029	135.241	143.404	164.685	155.023	129.678
GSU1280	nikQ	0.182583	0.325513	0.608811	49.3066	65.8373	65.795	71.8655	77.1122	56.406
GSU1281	nikO	-0.118114	0.575036	0.782179	36.7022	38.8166	57.6402	44.8519	42.023	35.8676
GSU1282		-0.0228544	0.867151	0.941497	130.872	101.682	106.012	113.602	118.883	100.728
GSU1283		-0.0183703	0.891544	0.95559	141.497	108.403	108.717	117.486	114.134	122.419
GSU1284		1.07098	0.104437	0.49961	31.9213	30.8155	28.0046	132.635	31.3491	26.6445
GSU1285		-0.000177903	0.999007	0.999712	67.9474	70.8209	75.4614	77.4133	77.3223	59.4804
GSU1286	cheY34H-2	-0.147383	0.468508	0.710346	27.3818	21.6257	17.7018	21.2097	21.5158	17.4641
GSU1287	mcp34H-1	0.0299437	0.82277	0.916695	56.5504	55.1845	50.1219	56.5023	59.7987	48.9336
GSU1289	cheY34H-1	0.0478857	0.779744	0.898353	17.1438	15.9107	14.8377	18.3078	17.6076	13.5784
GSU1290	cheA34H	0.0140387	0.900195	0.959253	69.8791	74.067	67.6646	72.4202	74.1285	67.1236
GSU1291		-0.104345	0.523908	0.749201	57.9509	41.2855	44.5131	44.0411	46.0572	43.5962
GSU1292		-0.24076	0.105937	0.49961	144.539	110.506	121.287	114.626	106.486	97.3548
GSU1293		-0.0174082	0.919569	0.967523	88.52	66.3403	60.4248	75.1515	73.6243	63.8784
GSU1294	mcp34H-7	-0.151782	0.395942	0.658807	14.6326	11.2472	10.9791	10.5408	11.6824	10.9311
GSU1295		-0.071085	0.82412	0.916824	1.97999	3.06327	2.74477	3.02996	2.85756	1.53718
GSU1296		-0.0877093	0.614553	0.80691	9.75507	7.77246	8.55255	7.4682	8.9509	8.1129
GSU1297		1.01645	0.0639737	0.49961	2.31804	1.78309	1.94919	1.79237	3.40386	7.04542
GSU1298	mcp34H-2	-0.623222	0.130055	0.49961	15.9365	14.6305	38.5859	13.6561	15.4645	15.8415
GSU1299	cheW34H-2	-0.0340978	0.900449	0.959253	1.01414	1.37161	1.59117	1.10956	1.51283	1.28098
GSU1300	mcp34H-4	-0.117233	0.577938	0.78486	7.72679	6.53801	6.24535	4.99303	6.55559	7.34431
GSU1301	cheW34H-3	-0.032744	0.89071	0.954999	5.89168	5.30356	3.89837	4.01149	5.79917	4.91044
GSU1302		-0.231439	0.177495	0.523535	10.576	10.3328	12.3316	8.79114	9.3291	10.2052
GSU1303	mcp34H-11	-0.351323	0.118895	0.49961	8.78922	6.7209	6.36469	6.01724	4.87467	6.23413
GSU1304	mcp34H-12	-0.0430941	0.890665	0.954999	1.8834	1.32589	1.23316	1.10956	1.26069	1.92148
GSU1305	gdhA	-0.25085	0.179924	0.523795	450.955	522.035	475.522	431.62	483.222	302.483
GSU1306		0.253106	0.163834	0.51437	32.3076	25.8777	24.8223	30.5983	30.2986	38.0025
GSU1307	ftn	-0.0952608	0.649636	0.822927	234.363	144.796	148.258	159.009	148.593	186.042
GSU1308		0.0591203	0.756919	0.88469	14.3429	9.78416	12.5305	12.0345	12.0606	14.0908
GSU1309		0.108526	0.279136	0.583056	254.356	233.631	225.589	258.613	243.817	266.872
GSU1310		0.251859	0.240446	0.557111	39.3583	61.1281	66.8293	66.1043	65.3457	67.8495
GSU1311	pgi	0.229966	0.1112	0.49961	116.047	144.294	158.003	162.039	164.142	164.521
GSU1312		0.392474	0.0972689	0.49961	47.1817	80.9251	80.9509	90.0879	93.165	91.2488
GSU1313		0.131274	0.343431	0.620822	30.9072	33.4216	36.8357	38.3226	34.5429	37.9598
GSU1314		0.128934	0.340134	0.619065	21.8765	24.4604	22.6742	24.2823	24.7095	26.4737
GSU1315	lpdA-4	0.629333	0.0449677	0.49961	13.1838	24.369	26.5726	32.2626	29.5422	37.4902
GSU1316		-0.059301	0.553598	0.766555	460.903	382.542	402.885	408.575	390.394	397.148
GSU1317	ispB	0.00625325	0.936901	0.976276	695.846	747.94	744.987	759.538	726.956	711.8
GSU1318		-0.263775	0.0486033	0.49961	136.909	111.009	122.6	107.713	102.074	98.8066
GSU1319		-0.0445443	0.719611	0.861999	89.1961	82.3881	71.8017	76.6878	82.4071	76.8591
GSU1320		0.17657	0.217543	0.544423	108.175	142.373	140.381	137.97	147.963	155.939
GSU1321	resA	-0.338676	0.225758	0.54845	136.909	71.9182	71.4437	69.6463	72.6157	79.2929
GSU1322	ccdA	0.117012	0.239433	0.557111	248.851	253.885	234.141	257.802	256.298	285.019
GSU1323		0.105355	0.425443	0.674469	56.6953	59.3908	61.7773	57.1851	63.4127	70.7531
GSU1324		0.151273	0.527267	0.750886	5.84338	10.3785	8.19454	9.81535	9.03494	8.2837
GSU1326	recG	0.167	0.303381	0.598124	174.336	254.663	246.552	241.116	261.887	255.514
GSU1327		0.539767	0.186464	0.52494	10.9624	32.2329	32.8179	36.4875	38.9973	35.1417
GSU1328		0.120002	0.334485	0.615294	57.0817	67.9862	61.1408	68.2381	68.4975	65.6291
GSU1329	yadB	0.513575	0.151597	0.505124	15.3087	35.0675	39.8191	44.5959	45.2167	39.07
GSU1330		0.554535	0.00829288	0.49961	39.4066	48.5093	55.2137	68.8355	64.7994	76.6456
GSU1331		0.305465	0.0515777	0.49961	57.2748	55.6417	60.5441	67.3845	64.6734	82.3246
GSU1332		-1.30257	0.130191	0.49961	164.629	1184.71	149.172	199.892	157.334	250.219
GSU1333		0.0416161	0.866118	0.941222	41.3383	28.3466	28.0046	32.2626	25.4659	42.7849
GSU1334		0.288954	0.0858163	0.49961	119.282	158.833	161.066	168.525	167.251	200.858
GSU1336		-0.228395	0.100144	0.49961	48.2441	51.1154	50.3606	45.4494	43.5358	38.8138
GSU1337		0.0796194	0.481155	0.719471	261.359	313.733	311.472	292.028	311.432	333.44
GSU1338		0.576918	0.243008	0.557111	0.820971	2.65178	1.98897	1.57899	2.89959	3.71486
GSU1339		0.451717	0.201891	0.537314	4.10486	9.1898	6.56359	7.08413	8.27853	11.8278
GSU1340		0.375745	0.2073	0.54242	12.218	22.6773	13.7636	17.6676	19.1205	26.3456
GSU1341		0.286401	0.408006	0.663	4.68437	11.6587	10.7006	9.73	10.5898	12.7244
GSU1342		0.0725706	0.663268	0.829577	25.2086	21.9458	21.9582	23.4715	20.8014	28.3952
GSU1343		-0.443718	0.334114	0.615294	1.64194	0.685806	2.14808	0.93886	1.4708	0.896689
GSU1344		0.106483	0.628415	0.814066	6.22972	9.78416	7.23984	7.93763	9.41315	7.68591
GSU1345		-0.563606	0.0355771	0.49961	153.57	241.495	283.507	142.365	175.362	141.463
GSU1346	cysP	-0.330643	0.185139	0.524054	2453.16	3723.15	4792.89	2812.91	3274.89	2634.81
GSU1347	cysU	-0.017086	0.956178	0.983012	556.812	1113.47	1304.88	1027.67	1148.99	763.638
GSU1348	cysW	-0.125343	0.671593	0.836267	877.28	1490.48	1957.26	1368.05	1570.78	1026.45
GSU1349	cysA	0.0481717	0.880324	0.949297	171.197	363.248	379.574	339.441	373.542	232.2
GSU1350	thiF-2	0.0465437	0.879373	0.94927	181.676	377.833	360.878	369.911	352.531	228.229
GSU1351		0.0889597	0.717359	0.861979	179.696	297.182	355.587	283.962	337.487	264.096
GSU1352	tusA-1	-0.484013	0.00161884	0.49961	121.6	116.267	132.465	86.4605	91.8202	86.5092
GSU1353		-0.287401	0.0789716	0.49961	20.9589	17.2366	18.2587	14.9364	15.2543	16.055
GSU1354		-0.140957	0.364312	0.63388	13.715	11.8873	13.3659	11.565	11.0941	12.6817
GSU1355		0.29574	0.326773	0.609784	1.15902	0.685806	0.795586	1.10956	0.966529	1.15289
GSU1356		-0.318804	0.113243	0.49961	27.3818	18.4253	21.7195	18.7345	16.5571	18.8305
GSU1357		-0.180495	0.315347	0.602741	19.8482	14.9506	15.4742	13.7842	14.2458	16.3112
GSU1358		-0.0854996	0.500907	0.732462	204.76	161.85	169.022	167.928	156.578	180.277
GSU1359		0.059742	0.551007	0.766184	208.189	229.562	216.36	221.443	215.746	244.583
GSU1360		-0.327589	0.151043	0.505121	113.825	66.6603	75.6205	74.2553	65.0096	64.7751
GSU1361		-0.218346	0.195703	0.529834	146.423	103.191	106.29	103.701	106.78	95.3907
GSU1362		-0.509635	0.0859745	0.49961	39.8413	20.2998	22.9527	20.1001	18.0279	20.1969
GSU1363		-0.469254	0.101377	0.49961	35.4949	21.3971	22.356	23.6422	18.28	15.2864
GSU1364		0.11688	0.417289	0.667504	77.6059	101.088	105.813	104.47	104.049	100.045
GSU1365		-0.0877462	0.567083	0.776249	58.627	45.2175	49.2468	52.7469	47.528	43.767
GSU1367		-0.110168	0.382656	0.647479	77.2679	72.6954	73.8702	75.5356	70.2204	61.6154
GSU1368		-0.197707	0.17818	0.523795	69.3479	55.3674	59.6292	54.838	56.4369	49.446
GSU1369		-0.184606	0.232363	0.5512	15.6467	13.2589	15.5935	13.1014	12.775	13.2795
GSU1370		0.172528	0.375704	0.642105	77.4128	122.439	124.271	116.632	123.758	124.981
GSU1371	namA	0.524191	0.0763671	0.49961	33.0803	63.6428	67.8237	79.0349	83.2475	74.4679
GSU1372	ghr	0.561589	0.0678817	0.49961	26.754	57.7906	50.2811	66.4884	69.1698	63.4087
GSU1374	mcp40H-26	-0.0386098	0.823333	0.916695	12.2663	12.5731	12.7692	10.7542	11.2622	14.6032
GSU1375		0.465937	0.085902	0.49961	6.13314	11.0186	9.30836	12.5039	13.4894	10.5895
GSU1376		0.268396	0.0955973	0.49961	100.738	137.801	138.711	144.969	151.703	157.775
GSU1377		0.294409	0.120269	0.49961	61.0899	89.5662	92.1687	97.8548	95.14	104.87
GSU1378		0.415377	0.183462	0.524054	8.45118	15.865	18.8952	19.46	21.1796	17.0798
GSU1379	fur	-0.0120391	0.906827	0.960905	183.753	169.76	182.508	182.95	187.212	161.404
GSU1380	feoB-1	0.129136	0.211033	0.544423	276.378	293.891	282.99	322.797	327.989	282.372
GSU1381		-0.130706	0.443584	0.690884	12.8458	10.1499	13.167	10.4555	11.052	11.5289
GSU1382	ideR	0.0297265	0.836742	0.92599	67.1265	88.6518	91.3731	83.3452	85.7269	83.264
GSU1383		0.22558	0.442127	0.689325	1.2556	2.2403	2.14808	2.38983	1.80699	2.43387
GSU1384	cas3-2	-0.128095	0.394653	0.658471	30.5691	27.9352	26.9306	28.6352	26.7686	22.7588
GSU1385	cse1	-0.267569	0.195125	0.529809	30.7623	34.1531	22.2764	24.325	21.5578	26.5164
GSU1386	cse2	-0.102429	0.570451	0.77877	15.5019	12.8017	11.178	12.5466	11.1361	13.066
GSU1387	cse4	-0.204125	0.315985	0.602741	76.9781	55.1388	49.8037	47.7112	50.4696	59.6939
GSU1388	cas5e	-0.193771	0.299343	0.594867	27.575	24.3232	20.6057	21.6791	17.8177	23.869
GSU1389	cse3	-0.298844	0.144784	0.503229	53.7012	41.697	38.6257	35.2073	30.9709	42.7422
GSU1390		-0.241579	0.220096	0.545341	18.496	14.8591	16.3891	12.76	12.3127	16.9944
GSU1391		-0.156383	0.378868	0.644713	25.0155	21.9915	19.6908	18.7345	17.7337	23.3566
GSU1392	cas1-2	0.230478	0.267271	0.576542	18.8823	28.2095	19.1736	24.8798	24.2052	28.6514
GSU1393	cas2-2	0.257562	0.285864	0.583738	5.02241	3.52047	4.29617	6.01724	4.07623	5.25204
GSU1394	ompB	0.357071	0.0781034	0.49961	4584.74	4440.13	4533.33	4988.89	4806.5	7570.28
GSU1395		0.1919	0.305853	0.598999	210.555	148.546	148.456	183.504	170.487	225.709
GSU1396		0.0781014	0.730068	0.869583	148.499	93.9097	111.899	111.639	103.671	158.671
GSU1397		0.28668	0.0980962	0.49961	960.15	807.605	961.625	1020.41	943.332	1365.66
GSU1398		-0.0754598	0.746401	0.881216	253.873	137.344	153.23	169.294	161.284	186.042
GSU1399	corA-1	0.0299724	0.898663	0.959253	21.2487	13.579	14.7183	14.4243	15.4224	20.7093
GSU1400		-0.0504879	0.822949	0.916695	30.1828	19.3397	21.083	20.0148	20.5913	27.5412
GSU1401	dnaE	-0.789032	0.117269	0.49961	577.722	2133.63	738.145	675.894	670.225	650.185
GSU1402	accA	0.385393	0.153606	0.508801	157.288	311.081	305.147	330.009	360.221	320.289
GSU1403	rluB	-0.0164565	0.942892	0.978889	63.5528	120.153	79.1211	85.9484	91.0638	82.837
GSU1404		0.0371501	0.746985	0.881327	94.3151	84.1712	90.6969	90.3439	85.5168	100.344
GSU1406		0.101428	0.567684	0.776249	6.22972	5.44073	5.09175	6.40132	5.54703	6.02063
GSU1408		0.0665051	0.617739	0.808624	58.0475	74.7528	68.6193	68.3661	71.7332	70.8384
GSU1409		-0.10655	0.476149	0.716136	30.8589	31.0899	27.2886	25.3065	26.2223	31.3414
GSU1410		-0.191123	0.266393	0.576542	39.4066	29.9926	32.619	28.5072	27.0628	33.7753
GSU1411		0.0259732	0.840742	0.927803	97.1161	125.091	112.655	108.097	109.848	123.017
GSU1412		0.00276864	0.983945	0.995689	25.1121	24.2318	23.8278	22.618	23.5329	27.1569
GSU1414		0.312935	0.333172	0.615294	125.947	79.0048	79.32	95.0809	85.853	172.122
GSU1415		-0.0275304	0.901464	0.959253	66.1123	39.3195	42.2456	49.5889	42.9895	52.2642
GSU1416		0.240396	0.210874	0.544423	70.5552	57.4705	56.3673	63.3304	64.6734	89.797
GSU1417		-0.167671	0.710886	0.857335	0.386339	1.32589	1.3525	0.810834	0.966529	0.982088
GSU1418		-0.719543	0.197356	0.531158	0.772679	0.594365	1.07404	0.810834	0.168092	0.512394
GSU1419		-0.109856	0.405824	0.661533	58.0475	53.5386	58.7938	53.0883	57.3614	47.4391
GSU1420		-0.000829	0.994374	0.998817	76.2537	78.319	79.2404	83.9853	79.9697	69.7283
GSU1421	sbcD-1	0.129387	0.283152	0.583107	79.9723	93.7725	94.277	94.014	96.1906	102.991
GSU1422	sbcC-1	0.0578587	0.637892	0.817702	120.152	131.126	152.116	148.041	140.819	131.087
GSU1423	hinT	-0.0154765	0.919606	0.967523	17.1438	19.7512	20.1681	20.4415	19.3306	16.6955
GSU1424		-0.0418912	0.732727	0.871518	61.6694	53.0814	53.3441	54.2832	54.6719	54.3137
GSU1425	lgt	-0.0899315	0.427968	0.676246	161.442	181.739	194.004	176.719	171.538	156.494
GSU1426	rsbW	-0.0894353	0.636666	0.817241	89.1478	56.6018	63.6867	67.5979	60.6392	68.5754
GSU1427	rsbV	-0.19134	0.499525	0.732029	53.7495	30.9527	25.5781	31.8359	29.8363	34.8428
GSU1429		-0.0593586	0.699681	0.852996	145.553	112.198	107.683	118.424	103.923	128.312
GSU1430		0.104911	0.580938	0.787033	6.32631	5.34928	4.57462	5.67584	5.96726	5.80713
GSU1431		0.195953	0.352476	0.62775	57.8543	37.1249	39.8589	47.7538	47.8642	58.7972
GSU1432		-0.175992	0.144257	0.503035	637.122	545.81	510.926	524.737	513.353	461.197
GSU1433		0.0149679	0.881744	0.950231	215.915	203.181	222.327	230.704	218.183	199.236
GSU1434		-0.0398705	0.669907	0.835208	130.486	127.651	134.295	131.526	127.498	122.718
GSU1435		0.140535	0.38691	0.651353	60.0758	81.5194	87.0372	84.5401	85.853	81.6841
GSU1436		-0.133219	0.455088	0.701031	71.6177	56.0989	52.3496	59.7883	58.2018	46.1581
GSU1437		-0.0986201	0.413802	0.665716	115.95	103.557	99.1699	107.67	98.1657	91.7612
GSU1438		-0.0198472	0.848536	0.932868	158.447	141.185	134.176	139.975	146.156	141.72
GSU1440		0.149659	0.170115	0.518131	113.004	127.057	116.752	126.319	139.264	130.233
GSU1441	frx-1	0.0104649	0.949551	0.982776	16.178	13.6704	14.9968	16.4301	15.9267	12.8098
GSU1442		-0.241339	0.0969214	0.49961	81.2279	70.5008	69.5343	67.6406	63.3707	56.1498
GSU1443		-0.387042	0.0522703	0.49961	57.3714	40.8283	42.4843	35.2926	38.9973	33.2629
GSU1444		-0.143957	0.327204	0.61008	16.9506	20.4827	18.7758	16.9422	16.7251	17.2079
GSU1445		-0.151338	0.261924	0.572612	209.01	158.695	164.129	160.161	161.41	157.262
GSU1446		-0.201258	0.0706815	0.49961	250.155	225.996	228.652	211.286	211.46	190.269
GSU1447		-0.00560671	0.97819	0.991718	6.90582	4.9378	4.89286	5.24908	5.46299	5.93523
GSU1448		0.347237	0.02522	0.49961	46.071	42.84	45.1098	57.2705	51.226	61.9997
GSU1449		-0.200971	0.186622	0.52494	63.6977	63.6428	80.0758	62.7329	62.6563	55.0823
GSU1450		-0.266391	0.0619149	0.49961	120.538	97.7045	101.119	93.1178	90.3494	82.0257
GSU1451		-0.127017	0.231887	0.5512	369.775	322.649	306.738	301.801	310.592	302.526
GSU1452		-0.117623	0.215092	0.544423	422.366	431.463	469.237	421.335	414.935	383.228
GSU1453		-0.220239	0.0976963	0.49961	49.0168	48.555	45.0302	40.7551	39.4176	42.2298
GSU1454		0.0602903	0.753459	0.883402	109.479	88.6975	92.4471	84.028	129.641	89.3273
GSU1455		-0.11041	0.635935	0.817215	4.82924	3.84051	3.54036	4.13952	4.2023	2.94626
GSU1456		0.0721109	0.494238	0.729555	143.09	164.319	168.545	170.915	167.462	162.002
GSU1457		-0.00465389	0.973271	0.990291	42.449	46.0404	54.4977	48.1379	47.1078	47.311
GSU1458		0.142858	0.300643	0.595213	98.7097	124.862	123.117	128.282	138.172	116.356
GSU1459	ispG	-0.0623233	0.510076	0.739456	375.039	427.988	410.443	400.979	395.478	365.721
GSU1460	proS	-0.0386599	0.681314	0.842151	912.534	1081.79	982.907	939.585	1015.53	943.402
GSU1461	pyrF	0.11263	0.325625	0.608811	358.185	429.04	425.559	467.68	442.922	400.692
GSU1462	rlmB	-0.0390243	0.701304	0.853682	119.427	119.742	129.402	119.534	126.573	112.641
GSU1463	aspS	-0.223059	0.0574777	0.49961	1669.52	1367.18	1421.59	1238.91	1243.12	1337.56
GSU1464		-0.256161	0.0928963	0.49961	256.288	194.632	195.993	175.225	194.02	172.378
GSU1465	icd	-0.0745829	0.666696	0.833246	6382.81	4592.57	4227.99	4285.38	5206.56	4945.33
GSU1466	mdh	-0.163535	0.341589	0.619065	5934.8	5004.96	4142.7	4101.11	4085.64	5279.32
GSU1467	korD	-0.293985	0.049272	0.49961	1270.24	994.464	990.346	858.203	818.986	977.733
GSU1468	korA	-0.295782	0.0782694	0.49961	7972.74	7103.76	5606.66	5222.88	5396.89	6229.3
GSU1469	korB	-0.170237	0.232609	0.5512	7411.25	6198.04	5497.66	5180.33	5641.29	6158.59
GSU1470	korC	-0.216129	0.152481	0.507068	2885.86	2239.38	2147.25	1922.87	2023.74	2314.01
GSU1471		-0.263299	0.0559896	0.49961	404.304	319.768	323.923	283.28	281.008	308.845
GSU1472		-0.318724	0.163676	0.51437	275.267	174.515	167.352	152.053	152.922	189.757
GSU1473		-0.365294	0.0857792	0.49961	219.972	158.421	138.989	125.252	123.169	153.163
GSU1474		-0.423557	0.0528287	0.49961	34.5291	26.7464	22.2366	19.9294	22.3142	19.9834
GSU1475	trmJ	-0.427789	0.0283897	0.49961	96.5849	127.468	86.5598	75.5782	73.7083	81.5987
GSU1476		-0.282138	0.132158	0.49961	26.3194	19.2026	19.5316	17.625	17.0613	18.7878
GSU1477		-0.233251	0.186681	0.52494	108.127	83.6683	73.0746	72.5056	71.8173	80.9582
GSU1478		-0.088674	0.527364	0.750886	92.5766	81.3366	74.626	71.6521	74.3807	87.662
GSU1479		-0.042349	0.768251	0.889927	31.6798	38.8623	35.0058	31.1104	34.753	36.6362
GSU1480		-0.0732096	0.537079	0.756487	217.413	189.557	172.762	191.869	172.925	186.212
GSU1481		0.211631	0.123391	0.49961	69.8309	85.2228	77.2912	88.7223	83.2475	97.0986
GSU1482		0.0746139	0.500242	0.732125	66.4987	71.5524	69.3354	73.1884	69.548	75.6635
GSU1483		-0.121695	0.366561	0.634964	24.0013	22.9974	24.8621	21.2951	23.4908	21.2643
GSU1484		0.0360131	0.72485	0.866064	181.966	211.045	213.496	210.305	208.098	203.463
GSU1485	rnr	-0.0868063	0.278983	0.583056	559.999	569.173	542.113	526.103	536.591	510.985
GSU1486	tatC	-0.277799	0.0477977	0.49961	319.551	257.68	263.697	243.677	238.438	211.491
GSU1487	ribF	-0.0890339	0.32273	0.607618	235.039	234.82	244.444	216.535	226.882	228.143
GSU1488		0.00566507	0.952484	0.983012	218.62	245.427	245.836	231.045	243.985	237.665
GSU1489		-0.153606	0.181781	0.523795	328.678	282.232	275.352	276.238	272.267	248.212
GSU1490	aroE	-0.0248305	0.784767	0.901306	137.44	146.031	142.688	141.683	140.315	136.895
GSU1491	pilB	-0.103591	0.487786	0.724907	455.204	352.001	324.918	351.134	321.392	381.093
GSU1492	pilT-4	-0.0734001	0.59439	0.793148	433.183	346.972	321.019	337.307	326.855	382.331
GSU1493	pilC	-0.0836455	0.572883	0.780509	488.623	372.072	346.279	362.4	364.297	412.221
GSU1494	pilS	0.0569152	0.840282	0.927777	312.935	204.05	201.92	204.117	191.667	351.972
GSU1495	pilR	-0.0687987	0.629718	0.814305	246.823	183.704	186.008	193.021	185.7	209.057
GSU1496	pilA-N	0.0363835	0.920524	0.968187	837.97	442.802	327.384	441.179	468.934	738.915
GSU1497	pilA-C	0.546412	0.293798	0.588235	1643.34	979.513	671.236	1119.33	866.64	2824.61
GSU1498	xapA	-0.202511	0.365915	0.634964	570.672	370.472	318.99	366.625	328.578	399.795
GSU1499	xapB	-0.062003	0.636925	0.817241	273.577	222.247	202.357	228.058	215.074	225.624
GSU1500		-0.0961889	0.407127	0.662434	197.951	165.142	160.191	166.989	161.873	160.635
GSU1501	xapD	-0.0348116	0.792874	0.905063	163.711	140.179	128.408	154.186	140.945	126.817
GSU1502	xapE	0.0303305	0.797846	0.906275	134.35	115.535	110.388	130.416	123.043	114.435
GSU1503	xapF	0.0400325	0.704283	0.853682	121.021	111.375	106.768	121.54	109.596	117.552
GSU1504	xapG	-0.0791465	0.570377	0.77877	81.1796	64.42	63.8856	69.2196	65.2197	63.8357
GSU1505	xapH	-0.0889927	0.459452	0.703895	115.226	94.0925	98.9312	100.885	95.3081	93.5973
GSU1506	xapI	-0.376112	0.256142	0.570482	162.552	71.461	75.1034	81.7235	76.9441	79.421
GSU1507	xapJ	-0.0933065	0.622966	0.810511	87.9405	66.8432	56.0093	72.2922	65.85	59.395
GSU1508		-0.110202	0.587793	0.790331	28.0096	20.0255	20.367	24.069	21.8099	17.4641
GSU1509		-0.203603	0.403865	0.661084	36.2676	23.546	24.3847	27.5257	26.9367	18.617
GSU1510		-0.194887	0.350375	0.627175	50.0792	44.0287	31.9826	41.8219	36.2238	32.0673
GSU1510.1		-0.276347	0.179036	0.523795	50.1758	35.3419	35.1649	37.2557	33.4923	28.8649
GSU1511		-0.356864	0.05111	0.49961	54.2324	43.2058	42.6037	36.9569	40.0059	32.3662
GSU1512		-0.0876451	0.523414	0.74913	227.457	184.71	171.25	194.216	187.38	167.382
GSU1513		0.233058	0.241108	0.557111	135.364	110.689	107.325	120.686	117.79	176.819
GSU1514		0.0314034	0.749586	0.882916	127.927	134.738	137.477	142.024	139.264	127.671
GSU1515	thrS	-0.208304	0.060173	0.49961	3236.27	2784.78	2700.86	2512.22	2494.15	2542.88
GSU1516	infC	-0.264261	0.0174095	0.49961	845.697	723.616	802.508	682.124	656.357	636.35
GSU1517	rpmI	-0.275884	0.103823	0.49961	411.934	287.993	302.164	280.25	291.555	255.813
GSU1518	rplT	-0.171023	0.181776	0.523795	1468.81	1199.06	1156.86	1117.8	1228.67	1050.66
GSU1519	pheS	-0.162655	0.151431	0.505121	826.332	819.904	845.191	784.674	800.454	640.663
GSU1520	pheT	-0.0831473	0.398559	0.659433	1413.23	1540.5	1507.99	1446.53	1499.51	1265.83
GSU1521	ihfA-1	-0.65138	0.0124112	0.49961	326.988	221.607	399.424	208	203.938	191.678
GSU1522		-0.492024	0.00103527	0.49961	268.941	265.864	269.147	196.094	202.257	173.275
GSU1523	surE	-0.353909	0.0146674	0.49961	73.8391	66.6146	65.6757	55.1367	53.8735	52.2642
GSU1524	pcm	0.000928044	0.99421	0.998817	156.757	171.223	190.066	180.56	187.338	150.516
GSU1525	rpoS	-0.184865	0.110817	0.49961	222.193	195.82	194.76	186.62	186.204	166.229
GSU1526	apt	-0.0156548	0.881753	0.950231	121.794	121.708	117.071	123.417	125.523	107.731
GSU1527		-0.0650498	0.735157	0.873792	36.7505	37.2621	33.4942	32.8174	42.9475	26.9861
GSU1528		-0.366393	0.0361004	0.49961	50.8519	40.0968	40.376	36.0608	32.4417	33.3483
GSU1529		-0.168922	0.260729	0.572612	55.5363	45.7204	45.7462	44.5105	46.5615	39.6678
GSU1530	hisGL	0.0538199	0.617128	0.808427	224.173	232.351	197.823	211.585	228.017	239.587
GSU1531	hisI	0.00916477	0.938538	0.976473	145.94	125.457	114.047	130.715	126.909	130.233
GSU1532		0.741304	0.0668129	0.49961	2.80096	7.49814	7.51829	9.5593	10.4217	9.90628
GSU1533	recC	0.663866	0.0694663	0.49961	76.5918	147.814	150.605	157.259	160.612	276.436
GSU1534	recB	0.332393	0.093815	0.49961	51.7695	76.6731	80.1156	84.7535	88.6265	89.2846
GSU1535	recD	0.531665	0.0975052	0.49961	20.6209	44.1202	42.4843	58.2093	50.4276	46.457
GSU1536		0.692429	0.166981	0.516569	11.4453	41.5598	45.6269	57.1424	59.4205	42.9984
GSU1537	exeA	0.270116	0.176364	0.522423	244.505	359.682	409.051	413.525	429.979	378.488
GSU1538		0.0650356	0.52002	0.746873	275.605	278.391	301.129	299.539	274.284	320.759
GSU1539	xth	0.269012	0.18244	0.523795	14.4877	19.8426	21.4808	24.2823	22.9025	20.1115
GSU1540		-0.215192	0.249497	0.563516	32.9354	27.4322	26.3339	27.9097	26.5585	20.1969
GSU1541		-0.230871	0.215163	0.544423	35.4466	29.0782	23.8676	26.3308	25.3399	23.6128
GSU1542		-0.126014	0.487756	0.724907	16.178	14.0362	11.3371	13.2721	12.859	11.9132
GSU1544		0.051864	0.764674	0.889147	6.47119	7.45242	7.39895	7.4682	8.11044	6.53302
GSU1545		0.0509948	0.755357	0.883783	8.40288	8.54971	8.63211	8.36439	8.11044	10.0344
GSU1546		-0.00355426	0.987769	0.997117	20.6209	14.3105	14.7979	15.7046	20.6333	13.2368
GSU1547		0.437924	0.0689616	0.49961	30.2794	49.9267	50.5197	60.3431	61.7738	55.0396
GSU1548		0.476297	0.271697	0.578493	17.5784	34.1531	46.9396	68.0674	37.2324	32.11
GSU1549		0.298705	0.188507	0.525761	25.3052	42.1542	41.8478	46.3882	43.1156	45.0053
GSU1550		0.681978	0.00613788	0.49961	2.17316	2.65178	2.54588	3.84079	3.95016	4.05645
GSU1551		0.014512	0.901318	0.959253	73.2113	81.6109	72.9553	78.8642	70.7247	80.4885
GSU1552		0.0758908	0.566976	0.776249	31.4384	30.4498	27.0102	30.2142	30.7608	32.7078
GSU1553		-0.0647435	0.647866	0.822826	38.7305	34.1531	30.3914	32.0493	33.6184	33.0494
GSU1554		-0.00377341	0.975444	0.990824	47.6163	50.8868	46.1838	45.6627	47.4439	51.1967
GSU1555		-0.0606308	0.589088	0.790546	99.2409	89.7948	86.162	87.8261	83.6678	92.359
GSU1556		0.0717992	0.721668	0.863543	88.182	73.1526	74.626	77.0292	64.4633	106.493
GSU1557		0.325658	0.151446	0.505121	85.6708	61.9511	63.1298	80.1872	72.4056	111.488
GSU1558		0.580252	0.0330434	0.49961	13.2804	9.96704	11.2973	14.9364	14.2038	22.5026
GSU1560		0.416995	0.0625842	0.49961	31.1486	24.2318	28.0444	32.7747	31.8954	46.7132
GSU1561		0.26584	0.114967	0.49961	137.585	182.059	177.654	198.74	226.336	172.89
GSU1562		0.402736	0.120211	0.49961	21.5867	36.4849	38.2279	47.2417	42.9475	37.1913
GSU1564		0.0212957	0.779375	0.898353	565.553	600.126	581.375	594.853	582.312	595.871
GSU1565		-0.0578177	0.670247	0.835208	39.31	32.4615	33.4544	34.3111	32.7779	33.9888
GSU1566		-0.214967	0.151099	0.505121	88.4234	73.3355	66.3519	67.1712	64.2111	65.1167
GSU1567	htpX-2	-0.855882	0.0277479	0.49961	12.4112	12.9389	26.5726	9.51663	10.884	8.3264
GSU1568		-0.296951	0.252971	0.566458	7.29216	9.14408	7.1205	5.88921	8.4046	4.86774
GSU1569		-0.501579	0.072519	0.49961	8.49947	7.77246	5.68844	5.12105	6.34547	4.01375
GSU1570		-0.484593	0.0318158	0.49961	36.9437	34.1531	26.9306	25.5626	25.508	18.9586
GSU1571		-0.0341136	0.808468	0.912979	22.2628	20.2541	18.4974	20.1855	20.2551	19.1294
GSU1572		-0.363248	0.345424	0.621874	22.3594	9.73844	9.14924	10.4128	8.82483	12.7671
GSU1573		-0.223235	0.206021	0.541905	24.3394	20.0712	17.3438	17.9664	17.3555	17.5495
GSU1574		-0.380762	0.123261	0.49961	6.90582	4.4806	6.36469	5.07838	4.58051	3.97105
GSU1575		-0.00175668	0.991704	0.998817	13.6185	17.7395	18.8156	16.4727	17.3555	16.3112
GSU1576		-0.213933	0.223281	0.547881	37.2335	29.9011	27.2091	26.9282	24.7515	29.6334
GSU1577	cobA	0.0297204	0.823675	0.916695	61.4763	63.4142	65.8348	65.6775	72.4476	56.5768
GSU1578		-0.454035	0.214158	0.544423	56.4538	126.28	49.9231	57.6972	57.1513	54.9542
GSU1579		-0.267243	0.0564248	0.49961	293.087	282.643	366.726	262.923	267.56	252.653
GSU1580		-0.0812077	0.50371	0.733153	85.5259	89.5205	81.667	85.607	85.1386	71.9059
GSU1581	ccaA	-0.019823	0.851645	0.93477	167.72	139.767	148.178	148.553	147.585	153.291
GSU1582	bioA	0.0651753	0.815606	0.915716	86.4917	121.388	117.15	128.624	142.416	69.0451
GSU1583	bioD	0.176087	0.605258	0.800679	28.8789	55.3217	58.1176	57.1424	68.8336	34.8855
GSU1584	bioB	-0.0179576	0.951298	0.983012	44.6705	59.2536	63.806	64.4826	68.4975	32.7078
GSU1585		-0.333475	0.0289165	0.49961	368.761	286.53	289.554	258.272	258.483	233.054
GSU1586	nusA	-0.447329	0.0103304	0.49961	1327.7	1117.13	1547.26	918.418	940.264	1069.15
GSU1587	ylxRQ	-0.249088	0.0201488	0.49961	467.326	465.891	525.206	408.916	415.565	402.699
GSU1588	infB	-0.0392182	0.62053	0.809879	3387.23	3475.71	3384.35	3329.45	3397.52	3245.5
GSU1589	rbfA	-0.105156	0.479417	0.71839	451.389	373.993	366.089	358.26	432.963	316.446
GSU1590		-0.0701978	0.653717	0.825593	711.782	591.805	605.998	729.665	592.902	496.296
GSU1591	truB	-0.120869	0.368217	0.635755	305.256	297.594	320.621	303.849	312.147	233.267
GSU1592	rpsO	-0.275873	0.159767	0.513677	585.884	405.997	358.81	359.626	391.276	364.611
GSU1593	pnp	-0.248129	0.0242316	0.49961	4302.47	4152.05	4700.05	3587.04	3870.91	3618.06
GSU1594		-0.286024	0.0718026	0.49961	628.816	475.172	496.207	451.336	477.465	383.569
GSU1595	dut	-0.219985	0.20642	0.542167	151.01	132.315	175.825	140.957	146.366	106.92
GSU1596	yrdC	-0.109423	0.511157	0.740387	154.874	113.707	114.326	132.507	119.009	103.375
GSU1597		0.283844	0.0803902	0.49961	45.4432	52.8985	58.8734	67.982	65.5138	57.9432
GSU1598		-0.367856	0.0200839	0.49961	544.545	458.255	427.866	393.254	390.856	324.516
GSU1599	rpmF	-0.190885	0.268722	0.577738	176.122	132.863	116.275	119.491	132.288	120.711
GSU1600	plsX	-0.247194	0.0346607	0.49961	1512.08	1241.17	1348.08	1165.59	1190.3	1099.6
GSU1601	fabH-2	-0.102683	0.288059	0.585069	1347.21	1154.35	1270.59	1203.41	1205.77	1103.82
GSU1602	fabD-2	0.0344554	0.657832	0.827807	1098.02	1136.47	1125.99	1168.03	1178.58	1095.11
GSU1603	fabG-2	-0.110828	0.293963	0.588235	503.545	443.579	476.477	456.969	465.447	395.91
GSU1604	acpP-2	-0.211359	0.24453	0.55902	1027.04	712.461	644.385	679.095	695.312	684.515
GSU1605	fabF-2	-0.109502	0.310092	0.601323	3652.36	3127.69	2955.8	3031.66	3064.23	2928.29
GSU1606	rpiB	-0.0388411	0.642341	0.819418	1089.48	1114.98	1002.32	1006.54	1079.82	1035.21
GSU1607	glyA	-0.153494	0.214345	0.544423	1514.93	1258.36	1174.48	1175.54	1258	1115.74
GSU1608		-0.156173	0.312788	0.601323	37.8613	28.621	35.6423	30.641	30.0044	30.9998
GSU1609		-0.152635	0.274533	0.581122	338.578	265.773	254.946	246.536	249.322	277.12
GSU1610		0.102931	0.325231	0.608811	109.624	120.976	110.507	117.998	119.766	128.568
GSU1611		0.342947	0.388729	0.652787	433.28	293.388	303.596	282.085	731.872	292.662
GSU1612	gpmA	0.221066	0.0838114	0.49961	55.7778	63.2313	62.4535	70.2865	72.1535	69.0878
GSU1613		-0.000954147	0.994034	0.998817	118.027	92.6295	99.3688	97.9828	101.864	109.951
GSU1614		-0.254454	0.193186	0.529809	23.953	16.8251	17.2642	15.7046	15.5905	17.336
GSU1615		-0.208946	0.480718	0.719471	5.98826	3.15471	3.73926	3.15798	4.41241	3.54406
GSU1616		0.096324	0.836085	0.925568	1.11073	0.640085	1.71051	1.87772	1.0926	0.768591
GSU1617	lexA-2	0.226251	0.502693	0.733057	1.73853	0.822967	1.1536	1.15224	1.6389	1.53718
GSU1618	cheX-4	0.137386	0.632794	0.816095	1.44877	2.74322	1.82985	2.34715	1.93306	2.34847
GSU1619	cheY-4	0.241065	0.619216	0.809301	0.724386	0.274322	0.954704	0.93886	0.504276	0.896689
GSU1620		-0.0727778	0.523207	0.74913	59.2548	57.562	58.4756	57.1851	52.949	56.5341
GSU1621		0.304196	0.133425	0.500214	4.29803	4.9378	5.29065	6.52934	6.2194	5.20934
GSU1622		-0.0405638	0.839474	0.927777	11.5419	9.69272	8.67189	8.32171	9.16101	11.5716
GSU1623	glcD-2	0.159376	0.283587	0.583107	22.0213	23.1802	26.6124	25.0932	28.6597	26.4737
GSU1624	glcF-2	-0.0593238	0.658256	0.827807	23.3735	21.8086	23.9472	23.4715	20.7594	22.1183
GSU1626		-0.185979	0.17094	0.51882	153.28	123.719	118.463	116.419	119.471	111.702
GSU1627	secG	0.0675461	0.524276	0.74941	380.11	434.709	446.483	450.141	467.8	403.852
GSU1629	gapA	-0.067909	0.51286	0.740945	1870.7	1573.51	1521.72	1548.14	1590.07	1599.35
GSU1630		-0.687705	0.0692031	0.49961	327.133	133.183	146.149	125.252	123.884	127.287
GSU1631		-0.238589	0.0668978	0.49961	398.799	313.688	340.153	303.679	307.692	280.792
GSU1632	purB	-0.165677	0.151293	0.505121	1250.92	1009.28	1014.41	957.082	959.427	1002.8
GSU1633	mscS-1	-0.110905	0.26133	0.572612	781.854	669.438	662.485	660.061	664.257	633.02
GSU1634	purSL	-0.00559062	0.953134	0.983012	2197.5	2208.29	2260.86	2272.89	2379.85	1988.13
GSU1635	purQ	-0.0920264	0.350235	0.627175	533.535	503.793	486.143	482.446	512.134	434.723
GSU1636	purF	-0.0215454	0.822558	0.916695	1192.58	1130.39	1147.67	1127.66	1255.9	1035.63
GSU1637	pyrE	-0.0560459	0.576321	0.783294	323.801	277.66	294.805	272.44	290.379	299.281
GSU1638		-0.051973	0.751187	0.883047	46.071	45.7661	47.8943	46.3029	52.2766	36.2092
GSU1639		-0.191161	0.224642	0.547881	747.036	544.758	534.037	493.84	528.985	576.358
GSU1640	cydA	-0.254166	0.304312	0.598333	5791.03	4881.52	4021.01	4668.18	4891.14	2760.74
GSU1641	cydB	-0.142878	0.789238	0.902778	978.694	1046.13	614.153	1047.98	1108.57	233.481
GSU1642		-0.0705636	0.799038	0.906275	202.49	100.722	114.246	118.211	120.774	158.458
GSU1643		-0.294794	0.105323	0.49961	62.2006	42.7943	50.1219	41.7793	43.7879	40.8634
GSU1644		-0.160598	0.114005	0.49961	682.662	605.795	590.325	537.156	553.569	590.107
GSU1646		-0.153173	0.39033	0.654823	67.0782	49.4237	46.3429	46.7723	46.8556	52.7766
GSU1647		-0.0139478	0.962993	0.9849	24.0013	13.6247	11.9736	13.4854	15.5065	20.0688
GSU1648		0.0665819	0.754481	0.883783	131.887	84.9027	90.8958	104.555	89.2568	128.355
GSU1649		0.217664	0.20932	0.543738	163.422	124.131	131.51	149.236	144.139	193.898
GSU1650		-0.0529909	0.781368	0.898353	136.957	90.4806	88.9466	104.683	92.0303	108.201
GSU1651	fbp	-0.167761	0.315789	0.602741	539.813	411.255	359.724	394.022	353.96	418.839
GSU1652		-1.53226	0.0477616	0.49961	38.7788	29.0324	181.036	27.1416	26.6426	32.3235
GSU1653		-0.0383392	0.820499	0.916695	33.853	35.3419	32.0224	38.92	32.862	26.7726
GSU1654		-0.180964	0.354525	0.62775	162.359	111.466	107.603	111.383	98.3338	126.689
GSU1655		-0.119066	0.490397	0.727009	260.248	175.886	186.485	182.95	178.976	211.32
GSU1656		-0.131071	0.472364	0.714265	173.128	111.649	117.508	122.436	118.337	126.519
GSU1657		0.172979	0.185226	0.524054	38.2959	35.479	39.0235	43.913	42.6113	40.6499
GSU1658		-0.221718	0.085506	0.49961	451.583	362.928	384.109	361.674	352.069	314.097
GSU1659	hisS	-0.140647	0.173088	0.521581	346.015	306.921	304.431	298.686	295.001	274.729
GSU1660	acnB	0.0492333	0.613229	0.806627	3328.85	3299.05	3019.37	3364.53	3055.58	3562.03
GSU1661		0.160663	0.606278	0.80068	5.31217	2.83466	3.06301	3.62741	3.61398	5.25204
GSU1662		-0.118201	0.751323	0.883047	10.8175	3.93195	6.00668	6.70005	5.1268	7.25891
GSU1663		0.0516618	0.798843	0.906275	29.2169	18.1967	21.7195	25.1785	21.5578	24.8938
GSU1664		0.115314	0.405905	0.661533	17.3853	18.5625	18.5769	20.9963	19.4987	18.5743
GSU1665		-0.0868033	0.597741	0.796167	20.814	28.3924	24.7427	21.4658	23.3228	24.8511
GSU1666		-0.176375	0.395768	0.658807	11.3004	7.58958	9.70616	7.4682	9.24506	8.5826
GSU1667		0.139337	0.563384	0.772877	6.3746	5.02924	4.8133	4.73698	5.54703	7.55781
GSU1668		-0.12397	0.553587	0.766555	16.2745	10.5614	11.3371	12.5039	10.8419	11.657
GSU1669		-0.370777	0.143704	0.502666	2.84925	2.78894	2.34698	2.51785	1.68092	1.96418
GSU1670		0.0935888	0.704285	0.853682	10.0448	5.62361	6.80226	7.25483	8.06841	8.6253
GSU1671		-0.202272	0.353671	0.62775	5.21558	4.89208	4.37573	5.16373	3.74005	3.67216
GSU1672	hprA	0.0881059	0.404631	0.661154	78.765	81.9309	75.5409	81.8088	85.3067	83.9899
GSU1673		-0.400261	0.182515	0.523795	14.0531	6.9495	8.0752	7.51088	7.312	7.17351
GSU1674		-0.221013	0.346957	0.623967	25.595	14.3562	19.293	17.0702	18.238	15.4999
GSU1676		-0.110908	0.630722	0.81501	56.5987	34.0617	34.0909	38.7066	34.9211	41.8455
GSU1677		-0.0829403	0.368476	0.635876	275.074	254.434	251.405	247.262	239.489	250.518
GSU1678		0.0313443	0.755176	0.883783	151.735	169.211	167.63	160.673	161.704	176.947
GSU1679		-0.185889	0.225013	0.547881	79.0547	63.1398	58.9927	57.8679	58.0758	60.8895
GSU1680		-0.171204	0.362112	0.631634	29.1686	20.117	21.9184	21.167	19.3306	22.7161
GSU1681		-0.0992697	0.600103	0.7973	156.854	103.191	109.831	109.036	104.595	131.6
GSU1682		-0.291055	0.321583	0.606912	6.22972	4.29772	4.01771	5.16373	2.98363	3.71486
GSU1683		-0.0414997	0.8994	0.959253	3.1873	1.92026	1.71051	2.30447	1.59687	2.69007
GSU1684		0.0443151	0.768262	0.889927	126.913	94.7326	98.8914	110.615	99.1322	120.754
GSU1685		0.178954	0.348203	0.625209	9.46532	10.9272	8.95035	9.3886	10.884	12.9379
GSU1686		-0.000652061	0.995903	0.999264	104.601	129.023	135.011	127.77	124.766	115.972
GSU1687	nrdR	-0.181963	0.131249	0.49961	112.956	104.288	100.721	96.4465	98.0816	85.7406
GSU1688	ribD	0.00576785	0.959678	0.98463	90.3068	93.9097	105.773	103.616	93.7953	93.7681
GSU1689	ribE	-0.0503427	0.674921	0.838183	84.3669	70.1351	79.5984	72.8043	78.625	74.6387
GSU1690	ribA	0.0543424	0.527943	0.750886	444.773	473.023	494.059	501.863	495.115	469.097
GSU1691	ribH	-0.104791	0.389888	0.654406	351.521	293.433	268.51	283.109	282.226	284.08
GSU1692	nusB	-0.224482	0.139651	0.501836	192.156	146.808	142.967	133.105	146.282	133.052
GSU1693	hom	-0.184135	0.118237	0.49961	991.54	1002.97	804.736	829.654	847.772	786.354
GSU1694		-0.138461	0.354383	0.62775	100.255	76.033	78.8028	80.6139	80.2219	70.8811
GSU1695	thrC	-0.10936	0.227704	0.548573	555.604	487.196	519.677	471.991	485.029	491.386
GSU1696		0.195124	0.166413	0.515758	69.9757	82.891	92.9245	92.7764	94.5937	94.067
GSU1697		0.0576197	0.693554	0.849496	43.1251	36.6677	44.9506	46.1322	38.7872	44.9199
GSU1698		-0.17974	0.104686	0.49961	989.898	813.32	843.163	782.582	746.118	807.661
GSU1699		0.114189	0.375263	0.64194	29.7964	32.4615	33.6135	33.5429	34.5429	35.6968
GSU1700	maeB	-0.177452	0.0832089	0.49961	1368.99	1197.42	1159.29	1083.32	1092.81	1118.34
GSU1701		-0.221161	0.131409	0.49961	32.0179	27.4322	27.1295	24.7518	25.4239	24.0825
GSU1702		0.0594728	0.717573	0.861979	45.1534	60.2137	57.2424	58.9348	61.6057	48.9336
GSU1703	pfk-1	-0.0568526	0.540362	0.758242	149.61	144.248	138.034	137.415	139.768	138.005
GSU1704	mcp40H-1	-0.147762	0.17629	0.522423	349.541	318.854	294.844	307.946	281.806	279.682
GSU1705	panB	-0.193866	0.344679	0.620926	98.6131	110.552	130.834	109.036	114.933	73.315
GSU1706	panC	0.0549856	0.803804	0.910456	116.771	145.254	146.229	155.424	171.664	97.0559
GSU1707		-0.0756711	0.708826	0.856996	237.454	225.447	223.361	229.082	269.998	152.096
GSU1708		0.0935955	0.536055	0.756332	122.856	137.618	146.825	151.156	164.982	118.491
GSU1709	smpB	-0.390609	0.0389129	0.49961	300.717	208.759	224.276	184.102	205.534	170.029
GSU1710		-0.394043	0.0520759	0.49961	237.84	161.393	169.738	160.545	145.189	127.202
GSU1711		0.00177192	0.993495	0.998817	2.65608	2.78894	2.78455	2.47518	2.39531	3.37326
GSU1712		-0.164322	0.498428	0.731162	11.7834	7.6353	6.80226	8.19369	7.60616	7.55781
GSU1716	apr	-0.00891886	0.961289	0.984641	786.684	950.801	1053.6	1152.62	881.768	739.555
GSU1717	cysD	-0.0952415	0.492053	0.728039	2708.05	2740.3	3342.62	2768.83	3095.71	2364.87
GSU1718	cysN	-0.0578416	0.781564	0.898353	5712.27	8781.19	8754.79	7663.91	8668.8	6001.97
GSU1719		0.289032	0.202492	0.538002	8.06484	8.36683	6.64315	8.40706	7.98437	11.7851
GSU1720	queD	-0.343635	0.0309803	0.49961	375.377	288.496	308.409	265.399	273.275	227.503
GSU1721	queE	0.0261788	0.855176	0.937209	432.748	532.094	624.456	540.997	575.211	502.274
GSU1722		-0.386325	0.0933464	0.49961	504.318	756.947	699.241	413.44	455.907	630.629
GSU1723		0.078848	0.758124	0.885068	31.3418	18.6539	19.8101	21.7645	21.3477	30.5728
GSU1724	sbcD-2	-0.00920292	0.928275	0.972564	84.9464	85.8172	90.7764	88.2102	88.6265	83.0505
GSU1725	sbcC-2	0.0365799	0.764024	0.889147	75.143	72.7411	65.6359	76.6451	75.6414	66.6966
GSU1726		-0.238344	0.432419	0.681045	5.65021	4.4806	2.94367	2.90193	3.656	4.48345
GSU1727		-0.163395	0.631222	0.815198	16.1297	7.54386	8.03542	8.53509	7.90032	11.8278
GSU1728		0.0703822	0.777116	0.898024	53.3631	33.9245	35.8014	37.8105	36.0137	55.3812
GSU1729	paaK-1	-0.205152	0.0625471	0.49961	790.982	667.563	672.35	622.763	634.001	591.644
GSU1730	livF	-0.180545	0.0992159	0.49961	220.841	208.714	204.744	201.3	183.304	175.068
GSU1731	livG	-0.0909427	0.328974	0.611522	268.409	282.278	259.6	243.378	254.197	263.2
GSU1732	livM	-0.0956411	0.285337	0.583543	496.639	487.882	452.569	430.382	444.855	469.652
GSU1733	livH	-0.18124	0.0808744	0.49961	580.378	522.492	492.627	459.572	462.043	485.493
GSU1734	livK-1	-0.110898	0.196042	0.530114	1508.22	1460.13	1359.3	1315.94	1336.37	1355.11
GSU1735	livK-2	-0.223036	0.0812787	0.49961	1648.9	1333.21	1269.92	1217.83	1211.73	1213.35
GSU1736		-0.192591	0.141489	0.501836	466.263	387.16	365.89	372.514	368.752	325.626
GSU1737	paaK-2	-0.0385788	0.710307	0.85725	828.022	864.161	858.398	877.706	886.433	719.145
GSU1738	iorB-1	0.0729883	0.522311	0.748506	384.07	474.166	447.796	474.551	480.953	418.327
GSU1739	iorA-1	0.00480216	0.952485	0.983012	1226.48	1271.03	1224.53	1268.4	1293.22	1172.83
GSU1740		0.143021	0.638012	0.817702	13.8116	8.13823	6.76249	8.70579	10.2116	12.7244
GSU1741	gppA-1	0.131284	0.282133	0.583107	56.3573	49.8352	52.1109	59.0202	57.7816	56.5768
GSU1742		-0.0246284	0.832517	0.923437	54.5222	51.4811	53.9805	49.6316	53.1171	54.5272
GSU1743		-0.127731	0.401739	0.659433	74.0323	56.5561	55.7706	57.8679	56.5209	56.1498
GSU1744		0.33459	0.0509097	0.49961	19.8482	25.6034	25.1405	29.4887	29.6262	29.9323
GSU1745		0.0960579	0.317901	0.603712	169.362	166.697	155.1	180.773	170.865	173.317
GSU1746	ihfB-1	-0.108291	0.550241	0.766184	82.9664	62.4998	54.6568	62.3488	56.7731	66.4831
GSU1748		-0.0994552	0.333396	0.615294	204.518	229.608	240.824	210.262	208.392	211.362
GSU1749		-0.362283	0.0986231	0.49961	31.5832	19.7969	22.8731	18.4358	20.045	19.2575
GSU1750	infA	-0.302494	0.0612957	0.49961	157.626	120.565	116.673	106.177	112.159	101.796
GSU1752	efp-2	-0.394435	0.0131978	0.49961	683.772	510.011	546.25	418.817	458.261	446.679
GSU1753	genX	-0.201659	0.157018	0.512457	129.327	152.295	171.449	132.379	140.063	121.565
GSU1754	yjeK	-0.0310483	0.80526	0.911599	295.405	305.641	322.968	333.466	318.324	252.567
GSU1755	pyrD	-0.0173029	0.846273	0.931342	346.257	379.433	379.932	368.46	377.577	346.421
GSU1756	pyrK	0.00858725	0.929378	0.972646	222.676	224.579	223.48	233.52	235.791	205.427
GSU1757	rimI	0.138618	0.373065	0.640517	129.086	153.62	166.079	164.002	189.608	140.481
GSU1758	purM	-0.523977	0.0770328	0.49961	1416.85	688.549	789.978	712.424	695.985	605.094
GSU1759	purN	-0.186186	0.182349	0.523795	301.538	230.202	236.846	230.319	234.362	210.807
GSU1760	ppcE	-0.135475	0.395345	0.658807	50.1275	37.2164	40.2567	41.0538	38.2409	36.8497
GSU1761	pgcA	0.0261186	0.905138	0.960905	610.754	484.956	368.595	444.038	426.743	620.167
GSU1762		-0.098683	0.386155	0.651353	127.975	109.866	113.689	115.522	110.1	102.65
GSU1763		-0.106189	0.433395	0.682263	59.3514	47.5035	51.7927	47.9245	50.0494	49.4033
GSU1764	dxs-2	0.013408	0.86214	0.939605	655.763	697.739	697.53	672.608	690.227	707.36
GSU1765		-0.0492476	0.588147	0.790447	338.337	331.061	325.872	307.775	309.331	344.756
GSU1766	xseB	-0.248348	0.0857003	0.49961	47.5197	41.0112	40.2169	35.8901	35.8876	36.5935
GSU1767	xseA	-0.120068	0.371837	0.640207	75.4811	66.4774	66.7497	62.7756	58.2018	71.0519
GSU1768		-0.146827	0.241659	0.557111	273.19	221.332	222.446	228.399	216.334	202.823
GSU1769	yibQ	-0.160888	0.167471	0.516839	103.587	90.4806	92.0494	82.1076	86.6514	87.1497
GSU1770		-0.207072	0.193373	0.529809	190.948	153.118	148.616	130.331	131.448	164.991
GSU1771		-0.301834	0.0777128	0.49961	135.991	104.563	95.3908	94.3981	91.4	86.68
GSU1772	ctpA-2	-0.223642	0.141213	0.501836	568.692	410.706	415.933	395.9	402.412	396.593
GSU1773		-0.28072	0.0539307	0.49961	352.245	270.71	281.16	258.229	253.357	232.627
GSU1774	ftsX	-0.216794	0.0970747	0.49961	167.768	138.213	139.029	135.068	127.582	120.242
GSU1775	ftsE	-0.218589	0.120337	0.49961	81.5659	70.2722	76.615	64.2266	72.4476	59.6512
GSU1776	oxpG	-0.293915	0.258438	0.572225	55.3914	37.1707	32.0224	38.4933	36.4759	26.6018
GSU1777	pulG	-0.404043	0.0369453	0.49961	56.309	44.1659	45.9451	37.8958	41.0985	31.6403
GSU1778	pulQ	-0.24082	0.0745533	0.49961	533.486	423.234	426.196	408.831	399.092	362.348
GSU1779	pulP	-0.0795637	0.508463	0.737436	67.0299	59.4822	67.8237	61.1539	63.8329	58.9253
GSU1780	pulO	-0.372566	0.0628366	0.49961	60.0758	43.4344	46.6611	37.5971	43.956	34.4158
GSU1781	pulN	-0.324333	0.0763425	0.49961	53.3148	39.1366	39.5009	36.5729	34.6269	34.1596
GSU1782	pulM	-0.197362	0.095461	0.49961	125.995	115.353	118.383	108.694	109.428	95.6042
GSU1783	pulE	-0.277744	0.0846247	0.49961	290.865	215.572	216.479	213.079	195.743	187.451
GSU1784	pulF	-0.187804	0.217379	0.544423	183.656	144.796	160.828	158.71	149.308	121.523
GSU1785		-0.320594	0.116448	0.49961	63.7943	43.6172	46.6611	45.364	41.7708	36.2092
GSU1786		-0.191299	0.185277	0.524054	113.632	98.7103	102.83	101.226	96.6949	78.0974
GSU1787		-0.118317	0.401996	0.659433	61.2348	55.6874	52.9065	56.2036	54.4618	45.7739
GSU1788		-0.391911	0.0498974	0.49961	66.1123	48.9665	46.144	39.9442	44.2922	38.6003
GSU1789		-0.373793	0.0244445	0.49961	77.123	62.6369	61.6977	54.1978	52.1925	49.0617
GSU1790	lon-2	-0.269863	0.0648983	0.49961	637.363	490.077	518.046	478.264	478.768	407.695
GSU1791	clpX	-0.331936	0.0310967	0.49961	1306.74	982.668	1018.95	902.543	916.647	809.155
GSU1792	clpP	-0.338154	0.0236082	0.49961	329.258	257.771	281.558	232.496	244.112	210.466
GSU1793	tig	-0.405649	0.0160721	0.49961	780.792	591.987	601.503	520	523.312	447.021
GSU1794	rdgB	-0.211416	0.168223	0.517455	125.415	96.4243	92.0096	92.8618	88.7525	89.4127
GSU1795	rph	-0.108882	0.473937	0.715318	121.069	90.1606	93.6007	97.9828	99.5524	85.1001
GSU1796		-0.444707	0.0910344	0.49961	117.785	83.9883	74.3476	80.998	71.355	50.4708
GSU1797		-0.371541	0.09893	0.49961	32.9354	25.4663	23.9869	23.2154	23.785	16.6528
GSU1798	cimA	-0.250484	0.129517	0.49961	643.448	480.338	435.265	417.409	441.704	451.376
GSU1799		-0.208819	0.206793	0.542167	943.779	724.531	615.426	668.383	675.015	632.508
GSU1800	yjeE	-0.197158	0.141312	0.501836	85.5742	73.2898	72.0404	70.3718	67.9932	63.0244
GSU1801		-0.205852	0.200195	0.534035	69.6377	52.3041	56.0491	51.8507	54.84	47.6099
GSU1802	yjeF	0.13392	0.331941	0.614374	262.035	352.778	347.552	341.532	370.895	343.603
GSU1803	acpS	-0.134319	0.216368	0.544423	105.809	101.179	94.3963	91.0694	94.0474	89.4554
GSU1804	pdxJ	-0.184948	0.0789926	0.49961	243.056	213.148	226.981	201.044	201.122	198.809
GSU1805	glmM	-0.134554	0.226676	0.548573	349.444	293.113	288.48	281.274	287.437	279.383
GSU1806		-0.237929	0.123953	0.49961	32.7423	28.4838	29.9936	28.7633	24.6255	23.9544
GSU1807		-0.239875	0.0767351	0.49961	113.391	91.9894	94.3566	82.449	85.0545	86.2957
GSU1808	folP	-0.0945658	0.302056	0.59668	209.734	206.153	195.356	190.759	191.121	190.568
GSU1809	ftsH-2	-0.110425	0.258719	0.572225	2179.49	1859.17	1895.68	1796.12	1817.79	1883.13
GSU1810		-0.297051	0.0317859	0.49961	76.0606	66.9804	67.9431	57.4412	55.3443	58.9253
GSU1811		-0.294506	0.044699	0.49961	196.019	160.158	167.113	151.028	149.35	126.262
GSU1812	argS	-0.0331641	0.659729	0.828222	635.77	649.687	658.746	650.587	625.344	624.096
GSU1813		-0.024959	0.925311	0.971054	4.05656	3.01755	3.22213	4.31022	3.36184	2.43387
GSU1814	divIC	-0.371444	0.0498722	0.49961	47.4232	36.5306	38.6257	33.1588	34.2487	27.3277
GSU1815	uxs	-0.250508	0.0695982	0.49961	237.068	187.362	187.281	171.299	167.63	175.239
GSU1816	ugd	-0.114738	0.196896	0.531158	373.3	383	390.315	352.542	368.668	337.753
GSU1817		-0.196229	0.427528	0.675867	165.112	87.8288	103.466	94.9956	97.6194	118.406
GSU1818		-0.05058	0.564725	0.774087	395.225	442.208	431.486	398.674	421.28	405.261
GSU1819	xerD	-0.0101101	0.933108	0.974174	83.4493	83.1196	83.1786	92.435	81.3565	74.2117
GSU1820	glnD	-0.13037	0.246024	0.561295	514.846	430.595	417.126	429.358	416.112	399.326
GSU1821		-0.118594	0.263168	0.572888	295.501	273.179	282.712	269.495	278.486	236.214
GSU1822	mutS-1	-0.0217948	0.814141	0.914919	296.322	306.921	328.259	310.123	318.828	288.606
GSU1824		-0.304142	0.101697	0.49961	79.1996	64.7858	52.7872	51.4239	52.8649	55.0396
GSU1825	pgsA	-0.226964	0.138079	0.501836	209.975	157.552	154.264	146.163	145.736	153.889
GSU1826		-0.211709	0.10824	0.49961	324.139	246.753	283.587	253.535	243.817	240.484
GSU1827	nadB	0.0106906	0.897235	0.958946	769.636	846.604	852.113	823.21	803.942	859.583
GSU1828		-0.162255	0.32408	0.608462	77.123	60.168	61.2999	58.9348	51.8984	66.6112
GSU1829		0.179656	0.217486	0.544423	32.3076	27.4779	28.2831	32.5187	31.2231	35.9957
GSU1830		0.0670057	0.530815	0.752021	224.125	272.676	260.197	256.906	267.14	268.964
GSU1831	scpB	-0.136979	0.199081	0.532357	168.685	158.97	145.155	142.835	139.895	147.228
GSU1832	scpA	-0.117788	0.215633	0.544423	261.6	244.055	242.495	237.574	229.656	222.251
GSU1833	trpS	-0.140421	0.127142	0.49961	520.351	488.797	465.1	438.49	439.771	459.233
GSU1834		0.0998243	0.41213	0.665447	69.9274	81.7023	77.689	84.156	85.7689	75.8343
GSU1835	glnA	-0.119407	0.416588	0.6667	1770.98	1355.47	1284.95	1264.43	1301.24	1495.25
GSU1836	glnB	-0.256801	0.0959439	0.49961	228.182	177.487	172.881	157.216	150.947	176.007
GSU1837		0.00609828	0.964627	0.985966	34.6257	43.6172	38.4666	39.9442	38.409	38.8565
GSU1838	hrpB	0.158315	0.42988	0.678238	99.5307	151.289	166.556	159.307	165.318	141.25
GSU1839		-0.0623262	0.56847	0.777008	69.0582	70.5923	73.6315	70.9266	66.6064	66.7393
GSU1840		0.0381648	0.736404	0.874657	107.885	130.395	125.742	124.655	130.313	118.833
GSU1841		0.236988	0.224769	0.547881	53.7495	83.7597	82.0647	85.6496	90.6436	82.5381
GSU1842		0.0148692	0.848259	0.932868	728.974	693.35	690.37	714.088	734.94	685.54
GSU1843		0.0923458	0.621588	0.809879	8.59605	10.4242	9.50726	8.74847	12.0186	9.65008
GSU1844		0.329844	0.143384	0.502662	670.83	583.941	519.16	644.314	592.902	992.336
GSU1845		-0.130255	0.397879	0.659433	59.786	47.1377	44.7517	47.1564	46.6035	44.7918
GSU1847		0.00252794	0.994245	0.998817	1.15902	0.685806	0.517131	0.768158	0.798437	0.768591
GSU1848		-0.0668701	0.855244	0.937209	3.23559	2.28602	1.59117	2.85926	2.47936	1.40908
GSU1849		-0.23442	0.441848	0.689325	4.87754	3.38331	5.768	3.28601	3.27779	5.38014
GSU1850		-0.525316	0.0871445	0.49961	10.9141	6.03509	6.20557	6.01724	5.16883	4.86774
GSU1851		-0.49814	0.198759	0.531916	11.2521	6.17225	9.4277	9.68733	4.70657	4.61154
GSU1852		-0.346656	0.198134	0.531158	9.80336	7.36098	9.90505	9.51663	5.92524	5.84983
GSU1853		-0.297316	0.119552	0.49961	9.5619	7.68102	9.26858	7.89496	7.10188	6.57572
GSU1854		-0.429604	0.127219	0.49961	43.0768	25.832	28.7207	31.0251	20.4232	21.0081
GSU1855		-0.516337	0.0747484	0.49961	16.516	11.9787	9.06969	9.85803	7.18593	9.18039
GSU1857		-0.166822	0.400367	0.659433	241.269	172.046	184.735	196.563	136.911	199.236
GSU1858		-0.101206	0.465278	0.708545	399.089	317.757	331.123	301.587	301.221	374.133
GSU1859	vorC	-0.128998	0.2715	0.578493	173.08	156.135	154.543	153.717	156.872	131.771
GSU1860	vorB	0.0132225	0.890412	0.954999	147.244	147.174	154.026	152.479	158.595	141.506
GSU1861	vorA	-0.0653124	0.481903	0.719973	427.147	458.713	487.257	439.771	456.958	415.637
GSU1862	vorD	-0.326009	0.0801836	0.49961	58.5304	51.7097	44.9506	48.0952	38.7032	36.9778
GSU1863		-0.11571	0.34181	0.619065	545.656	445.682	440.954	441.008	474.608	406.243
GSU1864	rsmA	-0.0907913	0.367946	0.635755	222.242	233.768	241.262	217.346	233.69	203.719
GSU1865	ygjD	0.218264	0.244292	0.558855	165.257	256.171	250.61	268.301	273.738	239.843
GSU1866		-0.166207	0.0846729	0.49961	843.862	761.016	833.337	747.034	745.53	680.331
GSU1867		-0.149201	0.261721	0.572612	76.8815	85.9086	92.9643	82.9611	77.5324	70.1553
GSU1868		0.14641	0.430033	0.678238	292.507	439.327	475.403	451.25	469.145	415.893
GSU1869		0.108895	0.444444	0.691586	166.464	218.772	233.226	222.638	219.822	224.557
GSU1870		0.019699	0.85692	0.937248	159.51	185.991	178.808	190.802	175.698	165.034
GSU1871	nrdJ	-0.0506551	0.643686	0.819989	521.51	548.645	550.785	541.125	572.689	451.205
GSU1872		-0.14524	0.348749	0.625855	173.901	140.956	130.635	130.8	152.375	119.601
GSU1873	pepF	-0.0487132	0.670231	0.835208	75.8674	77.6789	82.8603	72.3776	82.4911	73.6993
GSU1874		-0.0778693	0.49783	0.731162	91.9488	88.1489	78.3653	79.2056	80.8942	84.7585
GSU1875	ahcY	0.0752176	0.334796	0.615294	892.782	947.143	914.805	942.402	974.261	985.504
GSU1876		-0.0912162	0.449212	0.695794	440.089	364.574	361.316	352.329	341.143	401.034
GSU1877		0.136142	0.331966	0.614374	1771.27	1906.04	1914.7	1819.25	1852.16	2474.01
GSU1878		-0.0411203	0.81578	0.915716	48.8236	42.52	41.7285	48.0526	47.4019	33.8607
GSU1879		0.115221	0.586909	0.789728	6.32631	9.23552	7.08072	7.21215	9.37113	7.9421
GSU1880	metK-1	-0.092645	0.306857	0.599712	1782.72	1618.36	1588.83	1493.73	1560.69	1625.1
GSU1881	ptsI	-0.0436772	0.679235	0.840507	423.283	374.724	358.81	397.437	380.434	344.414
GSU1882	ptsH	-0.13417	0.354645	0.62775	77.123	58.705	63.2491	61.1966	62.152	58.0286
GSU1883		-0.251249	0.0820089	0.49961	144.732	109.043	119.537	105.024	105.52	103.077
GSU1884		-0.126303	0.172296	0.521527	526.967	467.994	471.345	441.35	448.427	453.597
GSU1885	hprK	-0.0865434	0.288608	0.585551	1050.17	985.503	984.578	980.981	946.988	916.416
GSU1886	raiA	-0.184673	0.16053	0.513677	1037.47	819.584	828.206	812.157	835.627	714.789
GSU1887	rpoN	-0.202928	0.122298	0.49961	585.208	444.905	482.006	449.629	449.646	414.399
GSU1888	lptB	0.039637	0.718112	0.861979	502.724	566.567	650.67	591.866	591.768	584.3
GSU1889	lptA	-0.164417	0.215414	0.544423	285.795	217.629	230.203	225.113	218.267	211.192
GSU1890	lptC	-0.286445	0.0633885	0.49961	303.132	228.465	250.132	226.137	222.512	192.276
GSU1891		-0.281512	0.0533972	0.49961	191.769	159.793	153.111	140.573	148.677	125.921
GSU1892	kdsC	-0.0627011	0.478541	0.71839	209.106	219.732	211.308	207.744	204.232	200.944
GSU1893	kdsD	-0.0757056	0.323284	0.608188	779.585	767.508	749.124	733.932	736.033	708.854
GSU1894	kdsA	-0.0695146	0.464112	0.708138	679.04	616.676	634.162	643.759	637.11	558.21
GSU1895	pyrG	-0.125619	0.13173	0.49961	1209.87	1165.96	1264.27	1103.42	1116.17	1116.98
GSU1896	kdsB	-0.171749	0.0640528	0.49961	602.834	595.005	660.973	557.64	545.206	547.365
GSU1897		0.244825	0.0937158	0.49961	30.1345	34.7475	35.9207	38.9627	41.3506	39.1554
GSU1898		-0.163252	0.106641	0.49961	267.926	248.399	273.005	225.625	243.985	235.274
GSU1899		-0.209773	0.14084	0.501836	421.786	309.527	329.969	298.301	312.651	306.668
GSU1900		-0.140585	0.211074	0.544423	276.233	231.985	230.442	225.07	219.948	225.026
GSU1901		-0.265913	0.0338676	0.49961	981.64	808.291	801.832	735.17	738.932	681.356
GSU1902	leuD	-0.199447	0.147789	0.503533	919.053	732.761	669.924	648.923	683.168	689.81
GSU1903	leuC	-0.1391	0.197968	0.531158	4063.42	3456.83	3342.34	3299.84	3225.01	3339.27
GSU1904		0.200135	0.596709	0.795297	168.444	127.651	130.596	110.956	273.696	105.468
GSU1905		-0.255338	0.131955	0.49961	1924.94	1509.92	1263.15	1249.67	1298.85	1387.35
GSU1906	leuA	-1.91e-05	0.9999	0.9999	1512.57	1259.23	1244.3	1424.21	1519	1072.78
GSU1907	pssA	-0.350994	0.00894711	0.49961	744.621	628.289	602.179	508.478	532.683	507.355
GSU1908		-0.178746	0.0617715	0.49961	474.425	477.321	437.851	398.29	424.138	405.218
GSU1909	ilvC	-0.153827	0.111906	0.49961	1841.82	1846.05	1761.55	1646.46	1743.49	1508.32
GSU1910	ilvN	-0.184815	0.0789131	0.49961	350.265	332.433	317.359	302.484	304.414	272.892
GSU1911	ilvB	-0.120328	0.241342	0.557111	1630.64	1454.96	1445.94	1424.85	1474.38	1269.67
GSU1912	ilvD	-0.0356254	0.654747	0.826272	885.731	851.679	812.413	846.894	841.594	799.121
GSU1913	yeaZ	0.0451919	0.708326	0.856699	198.917	227.276	237.005	238.001	244.406	201.926
GSU1914	rseP	-0.195412	0.106617	0.49961	540.151	435.807	440.795	417.153	424.054	396.038
GSU1915	dxr	-0.279745	0.0142345	0.49961	610.803	531.637	551.54	481.422	471.33	442.623
GSU1916	cdsA	-0.281585	0.0106557	0.49961	326.07	304.406	331.481	262.369	261.257	267.768
GSU1917	uppS	-0.34876	0.019304	0.49961	387.305	303.995	310.398	268.685	269.872	247.999
GSU1918	frr	-0.263834	0.0645043	0.49961	606.843	502.33	533.043	466.613	507.554	393.561
GSU1919	pyrH	-0.282147	0.0228582	0.49961	1088.51	941.703	1009.32	841.304	903.62	754.671
GSU1920	tsf	-0.290148	0.0197981	0.49961	1069.29	899.777	891.693	759.154	824.911	755.482
GSU1921	rpsB	-0.286409	0.0132036	0.49961	1134.78	973.981	987.363	827.264	878.659	832.683
GSU1922	lptF	-0.219433	0.0827751	0.49961	201.524	164.913	168.147	150.047	149.728	159.354
GSU1923	lptG	-0.382476	0.0191396	0.49961	223.159	274.871	200.925	181.2	180.825	174.129
GSU1924		-0.1199	0.247937	0.562049	220.89	200.987	190.265	188.967	192.087	182.241
GSU1925		-0.167632	0.311914	0.601323	174.77	120.336	124.43	122.052	127.54	123.871
GSU1926		-0.148969	0.220114	0.545341	68.0923	64.8772	64.4027	57.3558	57.0672	63.5795
GSU1927		-0.0422831	0.704803	0.853682	186.699	156.958	153.031	160.076	157.754	164.478
GSU1928		-0.134094	0.305555	0.598999	228.954	188.871	174.83	175.055	175.11	189.842
GSU1929		-0.0228308	0.88216	0.950366	59.8343	55.1845	53.8612	50.8691	49.2509	66.0988
GSU1930		-0.0620601	0.626693	0.812258	249.382	234.774	230.283	209.622	207.467	267.256
GSU1931		-0.0414512	0.758051	0.885068	258.268	242.181	219.463	222.851	205.072	271.569
GSU1932		0.236398	0.0711453	0.49961	246.726	277.065	265.965	290.748	286.303	353.338
GSU1933	fusA-1	-0.077291	0.709957	0.85725	1275.16	1024.91	818.857	900.239	824.239	1231.67
GSU1934	coaX	-0.0639431	0.584744	0.789553	150.286	125.091	127.214	134.94	130.271	119.9
GSU1935	birA	0.145657	0.224368	0.547881	105.133	111.649	111.82	123.076	132.456	107.987
GSU1936	nadC	0.189996	0.16555	0.515758	128.12	155.769	159.555	171.257	182.296	152.352
GSU1937		0.473611	0.246373	0.56171	150.093	136.338	130.039	120.473	125.523	332.287
GSU1938		0.294372	0.0524085	0.49961	41.4832	46.3605	44.3142	58.8068	48.5786	54.698
GSU1939		0.0110837	0.96162	0.984641	223.208	158.284	166.039	153.674	151.871	246.163
GSU1940		-0.169998	0.213849	0.544423	159.22	123.216	123.555	119.619	119.597	121.608
GSU1941		-0.0858551	0.368749	0.636022	266.091	236.969	262.305	240.177	235.791	245.18
GSU1942	capL	-0.169262	0.188158	0.525222	332.687	251.965	280.365	253.45	256.424	259.357
GSU1943		-0.32538	0.0819015	0.49961	53.1217	38.2222	45.9451	40.2856	36.3079	32.964
GSU1944		0.145544	0.656462	0.82751	4.78095	2.88038	2.82433	3.32869	2.94161	5.29474
GSU1945		0.379943	0.324521	0.608811	2957.72	2174.69	1322.5	2315.78	1900.83	4182.88
GSU1947		0.127502	0.751217	0.883047	388.03	226.727	134.534	235.867	202.593	379.855
GSU1948		0.141525	0.732174	0.87117	425.843	240.398	151.758	260.278	209.19	432.631
GSU1949		-0.132799	0.443321	0.690794	178.682	116.907	131.073	136.177	121.278	131.643
GSU1950		-0.000110598	0.999416	0.999712	80.9381	62.5912	59.0723	67.4699	65.0516	70.0272
GSU1951		-0.211167	0.326378	0.609721	43.9461	31.1813	28.3627	28.8913	26.1383	34.3304
GSU1952		-0.0542283	0.786842	0.902623	68.7201	46.2233	48.2125	51.4666	45.2167	60.4198
GSU1953	asnB	-0.111209	0.584912	0.789553	97.6956	65.4259	60.4646	72.0362	62.4462	72.461
GSU1954		-0.159582	0.401598	0.659433	45.0085	33.3302	30.2721	31.9639	29.6682	35.5687
GSU1955		-0.0751313	0.720236	0.862136	67.1265	46.4062	41.8478	49.8449	42.9055	54.698
GSU1956		-0.0021884	0.993484	0.998817	5.89168	4.29772	3.34146	4.18219	3.86611	5.42283
GSU1957		-0.133492	0.48416	0.721282	33.9979	25.9235	23.3902	23.7276	23.3648	28.8222
GSU1958		0.0404787	0.824499	0.916824	24.3877	19.6598	19.5714	22.1059	18.0279	25.2781
GSU1959		-0.01431	0.929122	0.972646	63.0699	50.7496	47.6556	55.094	46.6875	58.0713
GSU1960	cysE-2	0.142398	0.355999	0.628736	36.7022	29.3525	32.1815	35.5487	32.946	39.924
GSU1961		0.0681506	0.690248	0.847565	59.448	46.1776	43.5186	53.0029	45.679	57.6443
GSU1962		-0.0362646	0.861987	0.939605	54.2324	35.8448	37.5915	40.243	35.8876	48.3358
GSU1963		0.11201	0.39331	0.65688	94.5566	76.0787	83.2183	90.6427	84.8864	98.8066
GSU1964		-0.189221	0.340818	0.619065	49.7895	33.6502	33.2157	33.2869	32.4417	36.5508
GSU1965		0.134111	0.365252	0.634861	59.9792	54.5444	55.6513	59.6603	54.798	72.2902
GSU1966		0.112645	0.456302	0.701651	120.007	99.7619	99.687	109.463	101.065	134.845
GSU1967		-0.0326688	0.858121	0.937649	122.614	92.9038	89.5035	92.9045	85.5588	119.687
GSU1968		0.302149	0.0387513	0.49961	138.937	132.452	132.903	157.985	147.795	192.703
GSU1969		0.233832	0.107829	0.49961	176.557	180.047	171.33	188.882	186.078	245.864
GSU1970	neuB	0.276925	0.0406692	0.49961	143.429	135.607	141.654	161.057	155.317	193.343
GSU1971		0.625089	0.0275154	0.49961	19.4136	35.2504	34.0511	43.0595	45.637	48.2077
GSU1972		0.305856	0.0798359	0.49961	43.3183	45.4461	37.1141	46.2175	49.5451	59.822
GSU1973		0.677528	0.00643042	0.49961	14.9707	20.3456	23.3902	30.4703	31.3071	32.1954
GSU1974		0.085112	0.491313	0.727671	120.055	101.408	106.927	116.035	105.268	127.031
GSU1975		0.1338	0.399782	0.659433	122.663	95.9214	106.569	110.06	105.982	140.695
GSU1976		0.431596	0.0221642	0.49961	46.6988	56.6933	56.964	68.5795	64.1271	83.6056
GSU1977		0.470303	0.0219712	0.49961	78.6684	101.362	106.967	129.179	113.63	154.871
GSU1978	epsI	0.0725573	0.600942	0.797321	36.7988	37.8108	36.0003	36.5302	35.8456	43.9378
GSU1979	epsH	0.0153871	0.914641	0.964808	86.3952	71.9639	72.0404	76.9865	68.3294	87.5339
GSU1980		0.0857274	0.629217	0.814305	113.922	90.3435	90.2593	95.7637	89.0047	127.757
GSU1981		0.00687156	0.970636	0.98966	163.905	118.644	122.003	125.466	115.983	164.991
GSU1982		0.011171	0.953214	0.983012	151.397	108.083	111.939	114.498	107.327	152.437
GSU1983		0.230974	0.123852	0.49961	189.499	159.61	164.885	186.065	181.707	235.445
GSU1984		0.0944098	0.635318	0.817046	263.677	184.756	179.484	210.006	190.616	269.69
GSU1985		0.290664	0.11671	0.49961	87.6025	63.0484	76.3365	85.3082	83.8779	108.457
GSU1986		0.388243	0.0433458	0.49961	163.47	134.052	131.988	177.146	157.796	227.161
GSU1987		0.297518	0.139587	0.501836	409.761	299.834	286.769	383.567	348.202	492.709
GSU1988		0.0365911	0.888619	0.954579	23.8565	12.1616	16.9062	17.3689	16.0528	20.8373
GSU1989		-0.108209	0.560369	0.770308	156.226	112.289	105.256	110.06	103.208	133.436
GSU1990		-0.248697	0.180106	0.523795	175.543	126.554	116.474	118.04	106.864	127.33
GSU1991		0.0360564	0.789212	0.902778	29.0237	27.2951	25.4985	26.2454	30.2145	27.4131
GSU1992	fnr-2	-0.277692	0.206635	0.542167	39.4066	25.7406	26.9704	23.5142	23.3648	29.0784
GSU1994		-0.385479	0.0293768	0.49961	54.0875	48.7379	56.9242	44.1691	43.3257	34.8001
GSU1995		-0.200832	0.498144	0.731162	70.3621	34.5189	35.324	40.4563	37.4005	44.0659
GSU1996		-0.162366	0.354179	0.62775	606.505	450.94	440.238	405.63	401.782	530.797
GSU1997		-0.0578148	0.55263	0.766555	241.076	230.888	252.44	219.907	228.311	247.742
GSU1998		-0.042949	0.620634	0.809879	244.167	240.718	252.798	237.404	234.11	244.54
GSU1999	hfq	-0.274007	0.177139	0.523501	76.9298	53.7214	49.1672	47.1137	52.1085	49.446
GSU2000	miaA	-0.0598337	0.552953	0.766555	92.48	94.7326	91.0947	87.9114	92.6607	86.4238
GSU2001	mutL	0.324522	0.131431	0.49961	129.955	212.005	214.729	243.677	236.968	216.572
GSU2002		-0.0583468	0.54696	0.763796	151.638	144.705	140.58	142.536	144.601	132.454
GSU2003		-0.145665	0.331287	0.614129	37.1369	30.4955	30.1527	31.5372	28.9118	27.9255
GSU2004		0.0792725	0.529111	0.751542	252.328	304.361	322.252	315.841	330.595	282.201
GSU2005		-0.131946	0.644264	0.81999	192.735	144.568	116.275	112.236	106.528	195.094
GSU2006		-0.230481	0.386836	0.651353	38.8754	27.8894	24.9814	21.5938	21.7259	34.8428
GSU2007		-0.435847	0.104347	0.49961	63.746	49.2866	42.5241	31.7932	32.3577	50.8124
GSU2008		-0.252477	0.328325	0.610653	36.2193	31.4556	29.1185	21.5511	21.8099	37.8744
GSU2009		-0.0652706	0.758292	0.885068	20.814	24.2318	18.378	17.6676	17.1454	25.7905
GSU2010		-0.456713	0.185942	0.52494	16.7092	9.69272	8.55255	7.98031	6.34547	11.1019
GSU2011	nifS-1	-0.127009	0.252343	0.566458	1520.87	1476.95	1489.38	1385.97	1525.01	1198.06
GSU2012	nifU	-0.316531	0.0375033	0.49961	1115.8	854.331	889.108	774.047	829.029	692.842
GSU2013		-0.138898	0.174028	0.521619	915.335	786.528	759.586	751.045	751.455	732.979
GSU2014		-0.142577	0.344713	0.620926	389.913	301.709	279.211	266.935	302.565	309.913
GSU2015		-0.047914	0.671584	0.836267	72.1006	69.9522	66.6304	66.9578	71.0609	63.8357
GSU2016		0.0153242	0.912873	0.963445	85.7191	72.6497	70.5287	78.5228	67.8671	84.9293
GSU2017	mqnA	-0.0915329	0.457405	0.702355	139.758	148.454	145.393	146.377	144.475	116.1
GSU2018	gcvH-2	-0.0953695	0.316708	0.602741	373.011	342.4	343.296	328.942	312.105	349.922
GSU2019	accC	-0.0848708	0.37329	0.640576	1265.89	1153.11	1078.5	1074.99	1065.11	1157.54
GSU2020	accB	0.148422	0.213734	0.544423	412.128	530.402	483.319	534.595	499.485	546.297
GSU2021		-0.126889	0.139635	0.501836	613.555	592.673	603.93	536.26	539.281	582.208
GSU2022	aroQ	-0.0757611	0.508031	0.737125	240.158	223.07	193.765	205.653	198.811	218.878
GSU2023		-0.0108628	0.931848	0.97415	108.899	96.79	90.498	95.6784	89.7191	108.542
GSU2024		-0.12626	0.412732	0.665582	308.733	243.05	221.253	231.173	215.578	261.449
GSU2025	aroB	-0.00565945	0.952111	0.983012	377.84	343.726	344.37	342.214	339.378	380.154
GSU2026	aroK	0.147346	0.487498	0.724907	66.547	48.7836	47.2976	55.4781	50.1754	74.4252
GSU2027	aroC	0.258205	0.116781	0.49961	195.874	193.763	176.143	213.676	189.482	273.49
GSU2028	pilQ	0.212402	0.32066	0.60677	1706.27	1471.88	1175.04	1524.58	1363.06	2155.94
GSU2029	pilP	0.152619	0.399878	0.659433	273.528	219.869	180.439	238.257	222.932	287.752
GSU2030	pilO	-0.0237743	0.921868	0.968996	402.131	277.294	212.939	276.793	252.222	348.641
GSU2031	pilN	0.00196916	0.993382	0.998817	145.167	101.454	87.0769	101.397	92.2404	140.439
GSU2032	pilM	0.0224961	0.925554	0.971054	342.538	238.798	196.709	240.732	218.94	330.494
GSU2033		0.0484768	0.794874	0.905512	21.7799	17.0994	14.599	19.2466	16.9353	19.0867
GSU2034	pilX-2	-0.289289	0.22054	0.545341	246.388	159.884	148.098	144.712	129.137	179.722
GSU2035	pilW-2	-0.0234321	0.876329	0.947413	589.168	498.124	465.975	488.463	434.896	604.838
GSU2036	pilV-2	-0.284726	0.189012	0.525866	107.644	81.4737	69.8525	68.5368	59.7147	84.2888
GSU2037	fimU	-0.227555	0.412376	0.665447	139.469	90.6635	68.8978	82.6624	70.8507	101.796
GSU2038	pilY1-2	-0.0852839	0.605579	0.80068	2116.9	1687.13	1511.61	1597.64	1452.94	1959.86
GSU2039	pilL	-0.0999177	0.695931	0.850246	30.7623	22.0372	16.0708	20.6122	18.8683	24.723
GSU2041		0.0798024	0.599808	0.797222	108.948	109.637	102.75	99.6045	101.78	138.218
GSU2042		0.285295	0.0875346	0.49961	39.4549	45.9947	45.2291	49.3755	48.4105	61.4873
GSU2043	pilD	0.0439879	0.785176	0.901469	44.6222	37.8108	35.9605	39.9016	35.5094	46.6278
GSU2044		0.0828941	0.554229	0.766555	182.062	165.005	144.399	168.056	154.35	198.083
GSU2045	valS	0.0858962	0.420835	0.669682	392.569	485.505	449.665	486.97	473.473	448.772
GSU2046		0.122125	0.193578	0.529809	415.315	478.601	456.945	499.943	482.34	487.927
GSU2047		0.165233	0.144101	0.503035	160.331	159.473	161.783	190.205	189.145	160.678
GSU2048		-0.239766	0.0821241	0.49961	402.131	326.764	301.885	291.985	292.69	288.222
GSU2049	argJ	0.103195	0.294117	0.588235	733.224	861.921	865.598	877.535	909.924	855.783
GSU2050	secA	-0.12201	0.135379	0.501836	2438.53	2392.46	2444.72	2248.87	2219.99	2216.83
GSU2051	paaK-3	0.131828	0.347316	0.624281	256.288	340.617	343.614	349.853	360.851	319.862
GSU2052	iorB-2	0.360487	0.252897	0.566458	79.7791	180.641	186.366	194.003	199.147	180.619
GSU2053	iorA-2	0.311181	0.223868	0.547881	264.304	481.253	530.418	525.25	554.745	503.299
GSU2055		0.0825076	0.408508	0.663211	269.23	280.723	281.2	311.488	301.977	266.616
GSU2056		0.357559	0.138987	0.501836	43.3183	77.1303	71.7619	84.9668	86.9876	74.3825
GSU2057		0.180828	0.160933	0.513677	114.888	128.063	133.698	144.926	155.443	126.604
GSU2059	cheX-3	-0.282021	0.0798094	0.49961	98.0336	110.506	82.8603	87.3567	79.1713	73.1015
GSU2060		0.111014	0.351529	0.62775	175.06	196.643	192.253	191.912	188.347	228.827
GSU2061	argA	-0.129064	0.356705	0.629414	109.769	81.8852	93.4019	85.4363	84.088	91.1207
GSU2062		-0.142634	0.232536	0.5512	247.354	204.141	207.37	196.947	189.187	210.679
GSU2063		0.00161824	0.988291	0.997117	216.157	183.979	175.467	194.685	193.348	188.177
GSU2064	recN	0.250886	0.181311	0.523795	128.41	194.449	201.721	206.08	210.451	207.776
GSU2065	ppnK	0.0753559	0.461443	0.705342	117.061	129.434	120.412	133.489	131.784	121.309
GSU2066	glgP	-0.0715334	0.494216	0.729555	494.08	402.431	433.515	411.178	414.683	439.805
GSU2067	rarA	0.0998186	0.359454	0.630617	92.2385	101.545	102.074	111.17	105.982	99.9168
GSU2068	pfk-2	0.0398874	0.69497	0.849619	123.677	142.328	141.097	139.335	141.365	137.834
GSU2069		-0.0487416	0.626299	0.812258	93.9288	94.7326	100.92	92.9898	95.3922	91.5904
GSU2070		-0.243173	0.10511	0.49961	26.9955	24.5518	26.7317	22.49	23.5329	20.1115
GSU2071	rnhA	-0.175957	0.194999	0.529809	35.8813	35.3419	37.8699	32.5187	34.3328	29.7188
GSU2072		-0.292354	0.0455764	0.49961	276.184	215.252	243.012	204.373	213.435	181.9
GSU2073		-0.0607876	0.588382	0.790447	2409.02	2903.79	3029.83	2541.96	2658.33	2798.18
GSU2074		-0.219931	0.113615	0.49961	257.399	310.167	313.978	231.728	241.506	283.695
GSU2075		-0.109906	0.409647	0.664674	462.352	608.31	612.244	495.505	505.368	558.637
GSU2076	omcZ	-0.297355	0.0151512	0.49961	5061.34	5448.91	6002.5	4293.11	4612.32	4531.74
GSU2077		-0.430988	0.0500233	0.49961	226.105	142.922	148.576	127.13	119.555	137.193
GSU2078	rodA	-0.0108965	0.919265	0.967523	140.724	134.555	120.213	132.977	136.407	123.103
GSU2079	mrdA	-0.05826	0.521863	0.7485	264.304	246.753	250.809	243.463	253.819	234.42
GSU2080	mreD	-0.149028	0.217903	0.54458	100.738	88.5604	85.7244	85.6496	83.8779	78.4817
GSU2081	mreC	-0.0452191	0.652903	0.825184	93.301	94.4126	92.0891	94.014	90.7276	86.4238
GSU2082		0.229902	0.186381	0.52494	145.505	218.772	212.183	223.193	227.428	225.496
GSU2083	rmlA	-0.126686	0.179696	0.523795	472.831	426.937	413.068	398.077	403.589	400.777
GSU2084	gmhB	-0.0391085	0.701001	0.853657	155.164	170.811	174.273	170.147	164.688	152.053
GSU2085	hldE	0.0422825	0.636416	0.817241	311.148	350.355	339.994	336.411	345.009	349.88
GSU2086		0.0750456	0.445463	0.692212	244.408	285.158	274.159	277.518	283.865	285.275
GSU2087	gmhA	0.140226	0.308269	0.60029	142.752	184.162	187.122	199.166	190.658	176.733
GSU2088		0.0525404	0.633127	0.816095	102.283	122.851	116.036	114.754	118.631	120.455
GSU2089	mreB-1	0.0992214	0.438162	0.686244	464.283	634.599	586.506	598.353	615.553	591.516
GSU2090		-0.214564	0.0910631	0.49961	943.489	846.056	1117.76	823.508	832.307	849.763
GSU2091	purC	0.100538	0.401146	0.659433	746.456	801.89	905.417	784.631	870.212	976.068
GSU2092	yaeQ	0.210122	0.313486	0.601764	25.8364	39.9139	41.5296	38.92	42.2331	42.9984
GSU2093		0.0852224	0.571384	0.779412	69.2513	98.1617	87.2361	92.5631	91.6521	85.9541
GSU2094		-0.62075	0.0388578	0.49961	1.78682	1.96598	2.5061	1.57899	1.0926	1.40908
GSU2095		0.444989	0.120427	0.49961	7.87167	11.4758	12.3316	12.0345	12.1446	19.0013
GSU2096	cooF	0.271535	0.536021	0.756332	1.01414	3.15471	3.61992	3.41404	2.5634	3.50136
GSU2097	cooC	0.600451	0.0419138	0.49961	8.35459	14.7677	16.0708	19.8441	18.6582	21.0081
[truncated: 1,373 more rows]

## Sheet: p-value <= 0.05
locustag	gene	log2fc	pval	padj	NB_A_CPM	NB_B_CPM	NB_C_CPM	DB_A_CPM	DB_B_CPM	DB_C_CPM
GSU2420	mvhF	1.24383	0.0215483	0.49961	0.482924	0.594365	0.159117	0.853509	1.0926	0.939389
GSU0836	rnk-2	-1.36757	0.0242448	0.49961	1.01414	1.41733	0.477352	0.256053	0.336184	0.512394
GSU1080		4.46481	0.0401387	0.49961	0.338047	1.37161	0.517131	48.4366	0.672368	0.298896
GSU0762		-1.13817	0.0215669	0.49961	0.579509	1.28017	0.954704	0.46943	0.294161	0.512394
GSU3563		-1.08889	0.0088148	0.49961	1.2556	0.868687	1.23316	0.682807	0.462253	0.426995
GSU2176		-0.792522	0.0249949	0.49961	1.44877	1.82882	1.59117	1.15224	0.630345	1.02479
GSU3225		0.635848	0.0275754	0.49961	2.31804	2.4689	1.79007	3.67009	2.68947	3.84295
GSU2149		-0.744959	0.0488049	0.49961	4.15315	2.4689	1.90941	1.79237	1.51283	1.75068
GSU2776		0.66114	0.024346	0.49961	1.8834	1.41733	2.1083	3.28601	2.43733	2.86087
GSU0837		-0.940653	0.0111869	0.49961	2.75267	2.0117	2.18786	0.810834	1.34474	1.45178
GSU3083		-0.640389	0.0459809	0.49961	1.69024	2.78894	2.26742	1.19491	1.72294	1.40908
GSU2094		-0.62075	0.0388578	0.49961	1.78682	1.96598	2.5061	1.57899	1.0926	1.40908
GSU1550		0.681978	0.00613788	0.49961	2.17316	2.65178	2.54588	3.84079	3.95016	4.05645
GSU3571		-0.751819	0.00759571	0.49961	3.91169	2.88038	3.10279	1.96307	1.80699	2.09227
GSU3500		-0.834917	0.029816	0.49961	4.00827	2.83466	3.18235	2.64588	1.76497	1.19559
GSU2140		-0.876859	0.00438831	0.49961	4.87754	3.79479	3.22213	2.21912	2.1852	2.04958
GSU3168		0.567503	0.0362144	0.49961	2.26974	3.10899	3.77904	4.48092	4.70657	4.44075
GSU3497		-0.96672	0.00507772	0.49961	3.71852	3.33759	3.81882	2.04842	2.22722	1.28098
GSU2395		-0.733794	0.0294465	0.49961	5.50534	2.83466	3.97793	2.7739	2.35329	2.26307
GSU3543		-0.619046	0.0368096	0.49961	4.92583	3.47475	4.33595	3.54206	2.43733	2.30577
GSU0381		-0.620383	0.0154766	0.49961	6.32631	5.76077	4.33595	3.54206	3.57195	3.54406
GSU2581		0.565453	0.0108635	0.49961	5.36046	4.75492	5.21109	7.93763	6.63963	8.1129
GSU0805	fxsA	0.547247	0.0423862	0.49961	3.1873	4.7092	5.37021	5.97456	6.72368	6.74652
GSU3214		0.580817	0.036054	0.49961	6.56777	7.68102	5.64866	8.27904	8.65673	12.8098
GSU3242		1.12711	0.00526302	0.49961	10.4795	5.12068	6.1658	15.6192	18.8263	13.0233
GSU2123		-0.601333	0.00770451	0.49961	8.35459	7.45242	6.76249	5.07838	5.1268	4.65424
GSU3032		0.596464	0.0498964	0.49961	4.87754	6.30941	7.08072	7.89496	7.39605	12.3829
GSU2148		-0.546817	0.0399112	0.49961	7.29216	4.61776	7.20006	4.3529	4.16028	4.56885
GSU3047	flgI	0.540682	0.0246756	0.49961	7.24386	10.1956	8.19454	11.4797	11.3042	14.5178
GSU2122		-4.19089	0.0204241	0.49961	320.807	9.09836	8.31388	6.01724	5.00073	7.47241
GSU3150		0.537192	0.0177308	0.49961	8.25801	8.41255	8.67189	10.6262	11.2622	14.9021
GSU2590		-0.576444	0.0433505	0.49961	10.7209	7.04094	9.26858	6.48667	7.05986	4.56885
GSU2172		-0.530528	0.00984536	0.49961	12.1697	10.6986	9.90505	7.34018	7.81627	7.51511
GSU2180		-0.489662	0.0187203	0.49961	10.9141	8.96119	11.1382	7.93763	6.89177	7.25891
GSU1558		0.580252	0.0330434	0.49961	13.2804	9.96704	11.2973	14.9364	14.2038	22.5026
GSU3542		-0.529645	0.0478678	0.49961	15.7433	10.47	11.6553	10.7969	7.8583	7.55781
GSU1236		-0.425874	0.0413409	0.49961	13.5702	13.8076	12.3316	11.2236	10.2956	8.0275
GSU0252		-0.56328	0.035378	0.49961	17.8682	10.6528	12.3714	8.66312	8.82483	10.1625
GSU0223	ctaB	0.685335	0.0319222	0.49961	7.38874	14.1276	13.525	17.9237	16.6831	21.8194
GSU2183		-0.509287	0.0168296	0.49961	16.4677	12.5731	13.6045	10.9676	9.28708	9.69278
GSU1235		-0.331285	0.0490103	0.49961	13.6668	15.4078	14.8775	11.1383	12.4808	11.3154
GSU2097	cooC	0.600451	0.0419138	0.49961	8.35459	14.7677	16.0708	19.8441	18.6582	21.0081
GSU3506		-0.631258	0.00263985	0.49961	15.8399	18.151	16.7073	10.7115	11.7664	10.2479
GSU2505		0.998861	0.0163854	0.49961	24.1462	19.7969	17.0653	31.2384	27.6511	62.9817
GSU2502		0.990264	0.0137014	0.49961	14.5843	17.7852	17.8609	23.4288	25.1718	51.2394
GSU3151		0.510026	0.0206442	0.49961	16.516	19.9341	17.9007	22.874	23.1126	31.4268
GSU2331		0.629844	0.0356465	0.49961	12.0248	21.3057	17.9803	26.2881	21.2216	31.9392
GSU3611	rpmJ	-0.442433	0.0473971	0.49961	24.5808	17.7852	18.0996	14.7657	16.8092	12.8952
GSU2693		-0.60433	0.0130673	0.49961	26.2228	24.1404	18.1394	13.9122	13.8676	17.2506
GSU3449	frx-4	-0.444821	0.0446021	0.49961	24.6774	17.1451	18.378	13.1867	14.7501	16.2685
GSU0202		0.775841	0.0083502	0.49961	12.3146	19.8426	18.378	26.1174	25.9702	34.5012
GSU0912		0.326215	0.0376717	0.49961	18.2545	16.5051	18.4178	22.0205	21.5578	23.1004
GSU2330		0.430629	0.0378352	0.49961	18.834	18.6082	18.7758	23.7276	21.0955	30.9571
GSU0526	ymdB	0.4286	0.0387729	0.49961	13.0872	17.8309	19.0145	21.8072	22.9445	22.5026
GSU0063		-0.386135	0.0391265	0.49961	23.1321	17.9224	20.1283	14.723	15.0022	17.0798
GSU2653		0.507591	0.0266909	0.49961	13.5219	19.8884	20.7648	25.8613	25.2978	25.9186
GSU3425		0.629896	0.0309343	0.49961	12.7492	20.0255	21.0433	27.3123	22.3982	33.6472
GSU2655	bkdB	0.895263	0.00619288	0.49961	13.2321	24.2318	23.1118	37.9385	33.5343	41.2904
GSU1973		0.677528	0.00643042	0.49961	14.9707	20.3456	23.3902	30.4703	31.3071	32.1954
GSU2792		0.787666	0.0182712	0.49961	14.4877	26.5178	24.0267	34.7378	30.5927	47.0121
GSU0706		0.47217	0.0248639	0.49961	19.3653	28.7581	26.2941	34.6098	34.5429	34.1169
GSU3498		-0.332786	0.0335579	0.49961	28.8789	27.3408	26.4533	22.49	20.171	22.9723
GSU2403		-0.432787	0.0245418	0.49961	35.2052	28.3009	26.493	23.5995	20.6333	22.4172
GSU1567	htpX-2	-0.855882	0.0277479	0.49961	12.4112	12.9389	26.5726	9.51663	10.884	8.3264
GSU1315	lpdA-4	0.629333	0.0449677	0.49961	13.1838	24.369	26.5726	32.2626	29.5422	37.4902
GSU1570		-0.484593	0.0318158	0.49961	36.9437	34.1531	26.9306	25.5626	25.508	18.9586
GSU2884	omcA	0.668156	0.00566123	0.49961	22.2628	29.764	27.0897	41.6939	35.4254	48.6347
GSU2651		0.702844	0.013423	0.49961	19.7516	26.7007	27.7262	36.4448	32.6939	51.6664
GSU2883	omcH	0.611372	0.0257716	0.49961	28.6857	28.6667	27.8057	37.8105	33.2402	59.0534
GSU3604		-0.522078	0.00964765	0.49961	26.8506	30.4041	28.0046	21.8072	16.6831	20.88
GSU2292	ald	0.433085	0.0207996	0.49961	24.3877	28.5295	29.3174	35.378	33.4923	42.1871
GSU0848	frx-5	-0.490359	0.0427346	0.49961	44.1876	27.9809	29.5163	25.2212	21.7259	25.4062
GSU3608	ybhF-N	0.614427	0.0174233	0.49961	17.1438	24.4147	29.556	35.2499	36.1818	37.5328
GSU0379	lplA	0.456117	0.0424433	0.49961	23.1321	32.4157	30.3516	34.055	36.9382	46.884
GSU0911		0.549606	0.0263824	0.49961	27.1403	33.8331	30.3516	40.8831	35.7195	57.0892
GSU0193		0.443319	0.0113226	0.49961	26.8023	25.8777	31.1074	37.6824	36.0137	40.2656
GSU2098	cooS	1.40886	0.00150367	0.49961	20.0414	26.0606	33.0168	86.7592	79.1293	44.3648
GSU2467		-0.30867	0.0434501	0.49961	37.4749	33.3302	33.6931	29.2327	29.1219	26.004
GSU3122		-0.464906	0.00695478	0.49961	36.4608	31.5928	33.8522	24.1543	25.9282	23.7409
GSU3349		0.461126	0.00692547	0.49961	30.3759	30.4955	33.9318	43.3156	40.8463	46.3716
GSU2515		0.38712	0.0274386	0.49961	35.7847	37.0792	33.9318	41.6512	44.1662	53.8441
GSU2654	bkdA	0.433137	0.0362479	0.49961	22.794	29.3068	34.0113	37.341	37.6106	41.3758
GSU1971		0.625089	0.0275154	0.49961	19.4136	35.2504	34.0511	43.0595	45.637	48.2077
GSU0267		0.385309	0.0251452	0.49961	26.6091	30.6327	34.25	41.3952	39.4176	38.7284
GSU2981		0.683982	0.0366016	0.49961	17.8199	29.7182	34.7671	39.7735	37.3584	55.2104
GSU1025		-0.32013	0.0479088	0.49961	46.2159	38.8166	37.3528	31.2384	32.4838	34.2877
GSU3477		-0.52026	0.0245266	0.49961	32.1628	26.8836	38.4268	23.0874	25.8862	19.0013
GSU1814	divIC	-0.371444	0.0498722	0.49961	47.4232	36.5306	38.6257	33.1588	34.2487	27.3277
GSU0724		0.465354	0.0466589	0.49961	25.595	37.3993	39.8589	45.108	42.9895	53.9722
GSU3417		0.453672	0.015415	0.49961	30.0862	37.765	40.2169	48.0952	50.9319	49.019
GSU1528		-0.366393	0.0361004	0.49961	50.8519	40.0968	40.376	36.0608	32.4417	33.3483
GSU0768		0.565887	0.0242138	0.49961	26.2228	43.2515	40.734	58.6788	50.6377	53.8868
GSU2147		-0.438306	0.0467528	0.49961	41.4349	38.6794	40.8136	35.8901	22.4403	30.9144
GSU3038	fliC	0.485043	0.0293253	0.49961	28.1062	41.1941	40.8534	48.1806	48.9148	57.1319
GSU2319		0.481969	0.018891	0.49961	32.1628	34.4274	43.3595	49.1621	46.8556	57.6016
GSU1448		0.347237	0.02522	0.49961	46.071	42.84	45.1098	57.2705	51.226	61.9997
GSU1777	pulG	-0.404043	0.0369453	0.49961	56.309	44.1659	45.9451	37.8958	41.0985	31.6403
GSU1788		-0.391911	0.0498974	0.49961	66.1123	48.9665	46.144	39.9442	44.2922	38.6003
GSU0569		0.383135	0.0337451	0.49961	38.1027	52.2584	46.4225	55.8195	60.8073	61.7862
GSU0964		-0.552405	0.0379332	0.49961	80.3586	51.664	47.6954	41.2672	35.6775	45.5604
GSU0752		0.506062	0.0279433	0.49961	31.6315	48.3722	49.0479	58.0386	65.0516	60.249
GSU0220	coxC	0.405298	0.04746	0.49961	39.2135	47.3206	49.7242	53.9418	53.4953	73.0588
GSU0705		-1.69547	0.0437099	0.49961	9.36873	7.45242	50.838	7.25483	6.51356	7.17351
GSU1278		-1.05503	0.0361983	0.49961	80.8415	185.259	52.5087	49.1621	53.7894	50.3427
GSU3350		0.374208	0.0276039	0.49961	51.0451	51.0239	54.5772	63.9278	60.387	78.7379
GSU3553		-0.453928	0.0419825	0.49961	82.0971	60.6252	54.7363	54.1552	48.1163	41.8455
GSU0979		-0.455526	0.00776596	0.49961	65.2914	54.8187	55.0148	40.9684	42.4012	44.3221
GSU1330		0.554535	0.00829288	0.49961	39.4066	48.5093	55.2137	68.8355	64.7994	76.6456
GSU2986	acdA	0.490344	0.0380648	0.49961	33.5632	46.9548	55.6513	62.7329	69.9262	58.7118
GSU1994		-0.385479	0.0293768	0.49961	54.0875	48.7379	56.9242	44.1691	43.3257	34.8001
GSU1976		0.431596	0.0221642	0.49961	46.6988	56.6933	56.964	68.5795	64.1271	83.6056
GSU0444		0.866167	0.0244958	0.49961	45.0085	67.3461	57.6005	80.5713	72.4056	156.878
GSU2541	proC	0.594789	0.0470095	0.49961	32.0179	66.6146	57.7596	79.291	81.1044	75.877
GSU0075		0.342975	0.0482339	0.49961	53.4597	51.7097	58.4358	65.8909	60.303	81.3425
GSU2745		0.37683	0.0427529	0.49961	46.6022	64.0543	58.6745	69.0489	68.9597	81.8976
GSU0182		0.596996	0.00601522	0.49961	62.2972	82.9825	59.9474	103.189	93.249	113.965
GSU0143	cinA	0.566573	0.0296548	0.49961	35.5915	60.2595	60.1066	77.6693	70.8087	82.5808
GSU2818		0.467697	0.0391356	0.49961	61.2348	60.3052	61.2602	85.7777	104.805	62.2132
GSU1789		-0.373793	0.0244445	0.49961	77.123	62.6369	61.6977	54.1978	52.1925	49.0617
GSU2698		-0.546366	0.00550436	0.49961	77.5093	65.7916	62.732	46.9003	41.981	52.1788
GSU0789		0.488749	0.0129716	0.49961	49.5963	61.9511	63.0104	78.8642	72.6577	93.4692
GSU0065	tadA	-0.304419	0.0463904	0.49961	83.1113	69.4493	65.3176	58.5507	58.1598	59.6939
GSU1523	surE	-0.353909	0.0146674	0.49961	73.8391	66.6146	65.6757	55.1367	53.8735	52.2642
GSU2725		0.57435	0.0209517	0.49961	45.8295	52.7156	66.0735	77.1572	67.4469	100.6
GSU0624		0.367076	0.0392528	0.49961	55.0051	72.6497	66.511	75.4929	81.1044	93.8535
GSU0700		0.438486	0.0339612	0.49961	55.2465	69.7236	66.6304	78.9923	74.7589	105.937
GSU1810		-0.297051	0.0317859	0.49961	76.0606	66.9804	67.9431	57.4412	55.3443	58.9253
GSU2788		0.407783	0.0282992	0.49961	75.9157	68.5806	68.5	88.1675	80.6001	113.794
GSU0781	fdnT	0.534674	0.00437601	0.49961	68.527	64.1457	69.8923	101.738	109.218	82.4954
GSU3434	nuoI-2	0.516945	0.0177976	0.49961	54.9085	79.7821	70.5685	92.0936	88.1642	113.495
GSU0804	wrbA	0.578935	0.00872794	0.49961	59.7377	70.638	72.8757	90.9414	88.4164	124.298
GSU2882	omcG	0.58224	0.00951878	0.49961	57.2748	70.0436	73.2735	90.472	87.702	122.206
GSU3420		0.407859	0.0481758	0.49961	49.4514	76.033	73.8702	86.8019	88.1642	89.5835
GSU3060		-0.819872	0.0467593	0.49961	92.3351	93.6353	73.91	34.9085	32.1896	80.1042
GSU0719		0.41127	0.0476197	0.49961	59.5446	73.4269	74.4669	81.3821	80.39	114.136
GSU0355		-0.342827	0.0440762	0.49961	96.8263	74.2042	74.5465	63.7571	60.8493	69.0024
GSU3424	lpdA-3	0.446094	0.0435793	0.49961	47.7612	72.8326	77.2117	87.3993	92.4085	89.7543
GSU0192		-0.389883	0.0406227	0.49961	94.8463	67.9862	79.9167	61.4953	54.9661	68.7889
GSU2503	omcT	1.15311	0.0210314	0.49961	65.0982	79.3706	82.1045	106.902	104.385	292.705
GSU2507		0.422474	0.0396621	0.49961	78.2337	90.6635	82.4625	99.9459	95.098	141.848
GSU0728	ppk-2	0.268583	0.0414213	0.49961	71.1347	76.3988	84.5311	95.8491	92.7867	90.9499
GSU0717		0.530335	0.00793578	0.49961	61.9109	79.462	85.6449	101.184	106.948	119.815
GSU1475	trmJ	-0.427789	0.0283897	0.49961	96.5849	127.468	86.5598	75.5782	73.7083	81.5987
GSU2412		0.387995	0.0239169	0.49961	64.9533	78.3647	86.8383	94.0567	97.9976	109.183
GSU3337		0.253141	0.0391091	0.49961	81.1313	83.714	86.878	101.141	93.7113	105.169
GSU2119		-0.487266	0.0365539	0.49961	122.808	88.1489	87.0372	75.9623	56.3108	80.275
GSU0512		-0.265061	0.0322053	0.49961	92.6249	86.0915	88.2703	74.2553	76.776	71.1373
GSU2353		-0.662894	0.0013887	0.49961	103.925	85.4971	89.6626	62.7756	61.9839	51.4956
GSU1254		0.457559	0.0442279	0.49961	70.7967	90.8921	89.8615	101.354	96.989	147.142
GSU0721	rpoE	0.615383	0.0380163	0.49961	62.3455	96.1042	90.5377	149.577	87.2397	144.709
GSU1014		0.493019	0.00703722	0.49961	74.3703	95.2813	91.4527	109.164	128.674	129.678
GSU3130		0.300668	0.0442464	0.49961	75.5777	94.1383	93.8394	100.501	112.033	112.129
GSU0325	gspH	0.413102	0.0235038	0.49961	71.3762	98.8017	96.3057	122.692	122.077	110.122
GSU0034	dnaJ	-0.401775	0.0045302	0.49961	107.016	106.666	96.7035	78.6509	80.1799	76.0905
GSU0364	ppcB	-0.482829	0.0242975	0.49961	112.376	100.951	100.841	64.5253	64.9675	95.3053
GSU2354		-0.540354	0.00264845	0.49961	93.5907	107.031	102.79	73.0177	74.5488	61.0603
GSU0518	aplD	0.342997	0.021007	0.49961	81.6142	100.265	103.108	120.345	121.404	119.772
GSU0992		-0.519617	0.0281355	0.49961	109.672	169.394	103.506	89.8318	86.3152	90.6937
GSU0385		0.251039	0.032024	0.49961	105.326	107.031	103.864	118.296	133.171	124.853
GSU0375	gcvT	0.224415	0.0431215	0.49961	99.4341	106.62	105.654	119.363	120.606	124.213
GSU1977		0.470303	0.0219712	0.49961	78.6684	101.362	106.967	129.179	113.63	154.871
GSU0745	ehrS	0.830981	0.028531	0.49961	47.7129	101.133	108.24	134.342	132.288	190.909
GSU0078		0.525816	0.00699156	0.49961	96.2951	110.598	115.44	140.744	139.138	184.248
GSU0599		-0.274583	0.0481983	0.49961	138.937	109.043	121.804	104.171	102.746	98.7639
GSU1318		-0.263775	0.0486033	0.49961	136.909	111.009	122.6	107.713	102.074	98.8066
GSU0217		0.299287	0.0310349	0.49961	132.804	129.983	123.992	147.06	148.257	180.619
GSU2701	tupB	0.521552	0.0386707	0.49961	79.2962	139.676	124.43	171.086	177.883	144.068
GSU0589	thiS	-0.240085	0.0347991	0.49961	133.287	120.107	125.822	107.414	106.696	106.962
GSU2455		-0.247065	0.0417981	0.49961	136.571	116.724	131.868	108.865	108.798	106.877
GSU1986		0.388243	0.0433458	0.49961	163.47	134.052	131.988	177.146	157.796	227.161
GSU1352	tusA-1	-0.484013	0.00161884	0.49961	121.6	116.267	132.465	86.4605	91.8202	86.5092
GSU1968		0.302149	0.0387513	0.49961	138.937	132.452	132.903	157.985	147.795	192.703
GSU0790		0.312654	0.0248744	0.49961	130.438	117.959	133.977	150.9	147.375	176.648
GSU2870	rpmG	-0.344342	0.0419278	0.49961	179.938	131.766	136.881	112.791	126.027	114.477
GSU0335	atpI	-0.297275	0.0321118	0.49961	172.452	145.711	136.881	125.893	123.926	120.455
GSU2703	moeA	0.274901	0.0423427	0.49961	118.316	148.225	138.392	155.253	167.924	166.784
GSU2446	lpdA-1	0.42933	0.0461714	0.49961	106.968	151.106	138.711	165.239	151.661	217.468
GSU1970	neuB	0.276925	0.0406692	0.49961	143.429	135.607	141.654	161.057	155.317	193.343
GSU0377	gcvP1	0.5009	0.0382351	0.49961	88.6166	153.712	145.115	176.079	180.573	191.721
GSU2325		0.490451	0.0172657	0.49961	129.713	162.947	164.129	200.831	182.128	258.844
GSU2357		-0.418696	0.00278215	0.49961	180.082	164.913	165.005	127.002	120.312	134.204
GSU1811		-0.294506	0.044699	0.49961	196.019	160.158	167.113	151.028	149.35	126.262
GSU0541	polA	0.398497	0.0306333	0.49961	129.617	190.7	177.615	219.779	226.714	209.911
GSU3137		0.30018	0.0235186	0.49961	152.652	176.389	177.933	203.391	196.668	224.215
GSU2485		0.367809	0.00606359	0.49961	177.475	198.244	179.962	232.581	228.269	256.197
GSU1652		-1.53226	0.0477616	0.49961	38.7788	29.0324	181.036	27.1416	26.6426	32.3235
GSU0741	ehrC	0.484918	0.00992097	0.49961	172.549	218.223	185.173	243.25	314.794	247.999
GSU0074	elbB	0.314674	0.0361078	0.49961	153.184	190.654	191.418	211.628	210.409	243.729
GSU2639		0.370924	0.0199639	0.49961	178.73	201.673	199.454	232.965	225.117	291.808
GSU2426		0.66004	0.0447019	0.49961	93.3493	204.553	200.17	259.765	278.024	249.408
GSU1923	lptG	-0.382476	0.0191396	0.49961	223.159	274.871	200.925	181.2	180.825	174.129
GSU2612		0.306129	0.0221345	0.49961	179.696	222.43	212.183	255.242	257.811	246.504
GSU1253		0.465195	0.0186025	0.49961	186.602	227.596	216.718	267.66	248.104	355.26
GSU1709	smpB	-0.390609	0.0389129	0.49961	300.717	208.759	224.276	184.102	205.534	170.029
GSU2724		0.448831	0.0307319	0.49961	210.507	223.07	231.436	268.173	251.339	388.224
GSU2494		0.425117	0.0431733	0.49961	154.005	226.544	236.806	254.815	263.862	310.34
GSU0718		0.411559	0.030331	0.49961	197.323	219.412	239.551	266.167	249.869	356.968
GSU2072		-0.292354	0.0455764	0.49961	276.184	215.252	243.012	204.373	213.435	181.9
GSU3339	groES	-0.276909	0.0472091	0.49961	293.135	232.534	248.263	210.347	228.647	199.748
GSU1247		0.25557	0.029138	0.49961	272.176	281.089	250.888	315.628	301.053	343.304
GSU1486	tatC	-0.277799	0.0477977	0.49961	319.551	257.68	263.697	243.677	238.438	211.491
GSU1522		-0.492024	0.00103527	0.49961	268.941	265.864	269.147	196.094	202.257	173.275
GSU3431	nuoL-2	0.399499	0.0243234	0.49961	217.557	290.873	271.176	321.816	313.912	392.664
GSU0680		0.33263	0.00903886	0.49961	259.862	274.734	273.364	306.922	350.178	360.384
GSU0388		-0.231259	0.0466844	0.49961	325.781	285.021	278.415	252.425	261.845	243.216
GSU1792	clpP	-0.338154	0.0236082	0.49961	329.258	257.771	281.558	232.496	244.112	210.466
GSU1345		-0.563606	0.0355771	0.49961	153.57	241.495	283.507	142.365	175.362	141.463
GSU1585		-0.333475	0.0289165	0.49961	368.761	286.53	289.554	258.272	258.483	233.054
GSU1720	queD	-0.343635	0.0309803	0.49961	375.377	288.496	308.409	265.399	273.275	227.503
GSU1917	uppS	-0.34876	0.019304	0.49961	387.305	303.995	310.398	268.685	269.872	247.999
GSU2504	omcS	1.06515	0.0219972	0.49961	279.565	280.86	324.361	389.627	409.43	1052.37
GSU0855		-0.266508	0.0496157	0.49961	427.098	351.727	327.424	304.703	308.281	306.625
GSU1916	cdsA	-0.281585	0.0106557	0.49961	326.07	304.406	331.481	262.369	261.257	267.768
GSU2359		-0.361585	0.015305	0.49961	282.897	325.346	331.76	237.318	221.083	273.234
GSU0743	ehrL	0.427339	0.00612231	0.49961	265.319	337.142	331.799	404.222	414.473	437.712
GSU3318		0.252134	0.0491019	0.49961	283.235	357.762	338.562	373.538	396.529	396.593
GSU0191		-0.498406	0.0392556	0.49961	561.786	332.25	342.341	288.614	294.035	292.491
GSU2301		-0.299539	0.0193514	0.49961	299.268	295.537	344.29	245	272.015	246.034
GSU0109	atpF	-0.281476	0.0168757	0.49961	424.394	368.369	367.919	319.255	310.172	325.498
GSU3429	nuoN-2	0.333399	0.0331439	0.49961	275.363	341.943	375.079	403.539	398.672	448.259
GSU2853	rpsS	-0.445927	0.0246178	0.49961	573.135	410.02	378.262	337.435	347.404	314.524
GSU0742	ehrD	0.526652	0.0380106	0.49961	240.786	423.782	386.098	461.236	472.464	579.987
GSU1521	ihfA-1	-0.65138	0.0124112	0.49961	326.988	221.607	399.424	208	203.938	191.678
GSU2855	rplW	-0.418102	0.0346132	0.49961	626.836	444.905	403.561	359.242	379.005	365.807
GSU3444	nuoBCD	0.23523	0.0296083	0.49961	370.644	430.412	417.524	482.105	481.415	470.89
GSU1598		-0.367856	0.0200839	0.49961	544.545	458.255	427.866	393.254	390.856	324.516
GSU2449	sucA	0.447279	0.0257698	0.49961	297.626	422.548	434.708	502.93	478.894	592.925
GSU2304		-0.395718	0.00804229	0.49961	529.816	415.827	449.188	352.841	371.441	335.917
GSU2360		-0.524723	0.00352578	0.49961	536.094	449.02	451.933	303.892	311.222	383.74
GSU2303		-0.24064	0.0134123	0.49961	454.239	456.838	462.554	379.641	391.234	391.725
GSU2537	speA	-0.444105	0.00548153	0.49961	600.903	494.923	469.038	381.391	360.599	408.207
GSU0827		-0.574169	0.00975204	0.49961	350.12	297.777	470.749	257.632	259.492	234.292
GSU0778	fdnH	0.755919	0.00272564	0.49961	382.766	523.727	499.31	820.18	924.716	629.177
GSU3301	tmk-2	-0.231818	0.0437319	0.49961	609.016	541.055	520.87	485.348	497.51	440.018
GSU0648	rplS	-0.260372	0.0236615	0.49961	541.938	465.799	521.984	402.43	443.679	431.009
GSU2696	acrB	-0.384743	0.00726091	0.49961	487.512	581.335	524.212	399.186	375.013	445.953
GSU1587	ylxRQ	-0.249088	0.0201488	0.49961	467.326	465.891	525.206	408.916	415.565	402.699
GSU3091		-0.195899	0.0408511	0.49961	593.417	544.484	538.254	479.715	497.804	485.792
GSU1266	lepA	-0.243121	0.0175797	0.49961	574.1	544.941	539.209	459.743	492.509	448.814
GSU1752	efp-2	-0.394435	0.0131978	0.49961	683.772	510.011	546.25	418.817	458.261	446.679
GSU0814		0.41321	0.0118149	0.49961	403.773	498.398	546.647	613.417	621.31	694.678
GSU1915	dxr	-0.279745	0.0142345	0.49961	610.803	531.637	551.54	481.422	471.33	442.623
GSU0780	fdhD/mobA-2	0.876177	0.0049214	0.49961	363.787	614.756	565.742	983.925	1111.89	738.872
GSU0301		0.268415	0.0447187	0.49961	459.841	592.628	585.393	660.488	645.935	666.411
GSU1013		-0.76153	0.0391264	0.49961	344.953	227.779	590.405	233.776	216.334	236.085
GSU2307	can-2	-0.293769	0.00545145	0.49961	612.01	612.15	598.241	486.628	520.034	479.985
GSU1793	tig	-0.405649	0.0160721	0.49961	780.792	591.987	601.503	520	523.312	447.021
GSU1907	pssA	-0.350994	0.00894711	0.49961	744.621	628.289	602.179	508.478	532.683	507.355
GSU2848	rpsQ	-0.403126	0.0184479	0.49961	842.558	642.966	603.413	542.234	542.937	494.46
GSU1116		-0.221762	0.0330192	0.49961	718.205	676.982	619.881	590.842	578.53	558.552
GSU0869		-0.221962	0.0315738	0.49961	601.675	689.646	632.531	532.76	549.871	566.878
GSU2835	map	-0.344403	0.0231439	0.49961	834.348	639.217	642.913	573.985	567.604	525.374
GSU2858	rpsJ	-0.313751	0.0432164	0.49961	897.032	688.457	653.893	605.394	625.386	570.849
GSU2842	rplF	-0.323893	0.0476219	0.49961	927.408	699.339	679.63	600.572	670.939	571.02
GSU1137	rny	-0.240677	0.0461939	0.49961	858.784	723.571	684.722	632.194	649.591	636.906
GSU2875	rpsI	-0.196875	0.0432098	0.49961	764.469	746.019	687.785	621.568	668.88	627.384
GSU2868	nusG	-0.293393	0.0448519	0.49961	879.55	655.676	692.518	600.956	634.547	582.25
GSU2840	rpsE	-0.295861	0.0384906	0.49961	999.798	832.157	738.622	681.57	724.182	688.145
GSU3236	rplU	-0.329529	0.047492	0.49961	1098.22	852.045	747.215	707.644	724.392	714.533
GSU0033	dnaK	-0.30162	0.0187169	0.49961	796.873	975.581	797.217	675.979	704.473	704.413
GSU1901		-0.265913	0.0338676	0.49961	981.64	808.291	801.832	735.17	738.932	681.356
GSU1516	infC	-0.264261	0.0174095	0.49961	845.697	723.616	802.508	682.124	656.357	636.35
GSU3108	rho	-0.283567	0.0294399	0.49961	969.809	788.311	824.785	670.73	685.857	765.388
GSU2012	nifU	-0.316531	0.0375033	0.49961	1115.8	854.331	889.108	774.047	829.029	692.842
GSU1920	tsf	-0.290148	0.0197981	0.49961	1069.29	899.777	891.693	759.154	824.911	755.482
GSU2836	adk	-0.26728	0.0359923	0.49961	1203.4	995.653	959.199	880.949	905.511	837.636
GSU1150	hpnJ	-0.248154	0.019957	0.49961	991.926	1122.3	971.133	874.633	859.202	863.939
GSU1921	rpsB	-0.286409	0.0132036	0.49961	1134.78	973.981	987.363	827.264	878.659	832.683
GSU1467	korD	-0.293985	0.049272	0.49961	1270.24	994.464	990.346	858.203	818.986	977.733
GSU1919	pyrH	-0.282147	0.0228582	0.49961	1088.51	941.703	1009.32	841.304	903.62	754.671
GSU1791	clpX	-0.331936	0.0310967	0.49961	1306.74	982.668	1018.95	902.543	916.647	809.155
GSU2526		-0.400013	0.0278524	0.49961	1191.86	995.516	1037.21	907.92	891.98	643.823
GSU2843	rpsH	-0.341738	0.042171	0.49961	1475.77	1099.53	1057.65	946.115	1028.55	891.992
GSU3466	yidC	-0.254691	0.0164739	0.49961	1180.85	1043.7	1059.2	886.625	943.122	922.565
GSU2390	htpG	-0.241006	0.0183321	0.49961	1149.99	1196.41	1068.27	929.343	992.877	967.101
GSU0779	fdnI	0.688631	0.00120651	0.49961	937.694	1127.24	1084.03	1738.6	1936.5	1400.29
GSU0114	atpC	-0.275738	0.0253825	0.49961	1381.26	1161.07	1119.91	994.423	1035.45	995.197
GSU0777	fdnG	0.652301	0.0191775	0.49961	973.237	1356.02	1172.77	2039.46	2207.26	1257.37
GSU2308	mleA	-0.309672	0.0037364	0.49961	1243.72	1240.76	1198.23	945.603	1011.33	1014.37
GSU2867	rplK	-0.278249	0.0210275	0.49961	1414.82	1220.05	1251.42	1082.25	1135.84	986.486
GSU2305		-0.279153	0.0142596	0.49961	1246.62	1270.43	1294.1	1043.67	1138.4	958.603
GSU3092	yqeY	-0.245436	0.0112803	0.49961	1378.12	1294.3	1303.69	1110.12	1134.28	1109.67
GSU0645	rimM	-0.29195	0.0301629	0.49961	1703.52	1369.23	1343.31	1222.27	1226.31	1158.39
GSU1600	plsX	-0.247194	0.0346607	0.49961	1512.08	1241.17	1348.08	1165.59	1190.3	1099.6
GSU1252		0.370145	0.01553	0.49961	1198.86	1322.42	1364.87	1564.4	1507.91	1950.51
GSU1586	nusA	-0.447329	0.0103304	0.49961	1327.7	1117.13	1547.26	918.418	940.264	1069.15
GSU1251		0.440597	0.0161549	0.49961	1475.96	1684.38	1675.54	1982.49	1907.8	2672.86
GSU2845	rplE	-0.27903	0.0268552	0.49961	2126.8	1770.38	1785.18	1587.31	1632.21	1463.52
GSU2856	rplD	-0.337583	0.0308708	0.49961	2501.5	1992.68	1803.51	1645.95	1722.06	1615.71
GSU2851	rpsC	-0.269508	0.0475073	0.49961	2861.76	2334.07	2283.17	2130.1	2170.74	1903.71
GSU0534	iscR-1	-0.467749	0.00150073	0.49961	2651.45	2203.36	2443.29	1674.5	1843.8	1758.88
GSU2831	rpoA	-0.341736	0.0434998	0.49961	3717.74	2778.7	2615.97	2377.92	2527.35	2285.19
GSU2837	secY	-0.301961	0.0330267	0.49961	4068.59	3451.29	3118.22	2878.2	3038.39	2712.44
GSU2750		0.466038	0.0493047	0.49961	2817.38	3647.53	3154.62	3801.27	3616.54	5869.77
GSU1593	pnp	-0.248129	0.0242316	0.49961	4302.47	4152.05	4700.05	3587.04	3870.91	3618.06
GSU2076	omcZ	-0.297355	0.0151512	0.49961	5061.34	5448.91	6002.5	4293.11	4612.32	4531.74
GSU2860	fusA-3	-0.28355	0.0269339	0.49961	8908.26	7468.2	7464.67	6244.14	6567.23	6775.68

## Sheet: log2FC >= 0.58 (UPREGULATED)
locustag	gene	category	log2fc	pval	padj	NB_A_CPM	NB_B_CPM	NB_C_CPM	DB_A_CPM	DB_B_CPM	DB_C_CPM
GSU1558		hypothetical/protein of unknown function	0.580252	0.0330434	0.49961	13.2804	9.96704	11.2973	14.9364	14.2038	22.5026
GSU3214		electron transport	0.580817	0.036054	0.49961	6.56777	7.68102	5.64866	8.27904	8.65673	12.8098
GSU2882	omcG	electron transport	0.58224	0.00951878	0.49961	57.2748	70.0436	73.2735	90.472	87.702	122.206
GSU2541	proC	metabolism	0.594789	0.0470095	0.49961	32.0179	66.6146	57.7596	79.291	81.1044	75.877
GSU3032		hypothetical/protein of unknown function	0.596464	0.0498964	0.49961	4.87754	6.30941	7.08072	7.89496	7.39605	12.3829
GSU0182		cell envelope	0.596996	0.00601522	0.49961	62.2972	82.9825	59.9474	103.189	93.249	113.965
GSU2097	cooC	metabolism	0.600451	0.0419138	0.49961	8.35459	14.7677	16.0708	19.8441	18.6582	21.0081
GSU2883	omcH	electron transport	0.611372	0.0257716	0.49961	28.6857	28.6667	27.8057	37.8105	33.2402	59.0534
GSU3608	ybhF-N	transporter	0.614427	0.0174233	0.49961	17.1438	24.4147	29.556	35.2499	36.1818	37.5328
GSU0721	rpoE	cell envelope	0.615383	0.0380163	0.49961	62.3455	96.1042	90.5377	149.577	87.2397	144.709
GSU1971		hypothetical/protein of unknown function	0.625089	0.0275154	0.49961	19.4136	35.2504	34.0511	43.0595	45.637	48.2077
GSU1315	lpdA-4	metabolism	0.629333	0.0449677	0.49961	13.1838	24.369	26.5726	32.2626	29.5422	37.4902
GSU2331		hypothetical/protein of unknown function	0.629844	0.0356465	0.49961	12.0248	21.3057	17.9803	26.2881	21.2216	31.9392
GSU3425		hypothetical/protein of unknown function	0.629896	0.0309343	0.49961	12.7492	20.0255	21.0433	27.3123	22.3982	33.6472
GSU3225		cell envelope	0.635848	0.0275754	0.49961	2.31804	2.4689	1.79007	3.67009	2.68947	3.84295
GSU0777	fdnG	metabolism	0.652301	0.0191775	0.49961	973.237	1356.02	1172.77	2039.46	2207.26	1257.37
GSU2426		protein modification	0.66004	0.0447019	0.49961	93.3493	204.553	200.17	259.765	278.024	249.408
GSU2776		hypothetical/protein of unknown function	0.66114	0.024346	0.49961	1.8834	1.41733	2.1083	3.28601	2.43733	2.86087
GSU2884	omcA	electron transport	0.668156	0.00566123	0.49961	22.2628	29.764	27.0897	41.6939	35.4254	48.6347
GSU1973		metabolism	0.677528	0.00643042	0.49961	14.9707	20.3456	23.3902	30.4703	31.3071	32.1954
GSU1550		metabolism	0.681978	0.00613788	0.49961	2.17316	2.65178	2.54588	3.84079	3.95016	4.05645
GSU2981		transporter	0.683982	0.0366016	0.49961	17.8199	29.7182	34.7671	39.7735	37.3584	55.2104
GSU0223	ctaB	metabolism	0.685335	0.0319222	0.49961	7.38874	14.1276	13.525	17.9237	16.6831	21.8194
GSU0779	fdnI	metabolism	0.688631	0.00120651	0.49961	937.694	1127.24	1084.03	1738.6	1936.5	1400.29
GSU2651		transporter	0.702844	0.013423	0.49961	19.7516	26.7007	27.7262	36.4448	32.6939	51.6664
GSU0778	fdnH	metabolism	0.755919	0.00272564	0.49961	382.766	523.727	499.31	820.18	924.716	629.177
GSU0202		de/hydrogenase	0.775841	0.0083502	0.49961	12.3146	19.8426	18.378	26.1174	25.9702	34.5012
GSU2792		metabolism	0.787666	0.0182712	0.49961	14.4877	26.5178	24.0267	34.7378	30.5927	47.0121
GSU0745	ehrS	electron transport	0.830981	0.028531	0.49961	47.7129	101.133	108.24	134.342	132.288	190.909
GSU0444		hypothetical/protein of unknown function	0.866167	0.0244958	0.49961	45.0085	67.3461	57.6005	80.5713	72.4056	156.878
GSU0780	fdhD/mobA-2	metabolism	0.876177	0.0049214	0.49961	363.787	614.756	565.742	983.925	1111.89	738.872
GSU2655	bkdB	metabolism	0.895263	0.00619288	0.49961	13.2321	24.2318	23.1118	37.9385	33.5343	41.2904
GSU2502		metabolism	0.990264	0.0137014	0.49961	14.5843	17.7852	17.8609	23.4288	25.1718	51.2394
GSU2505		hypothetical/protein of unknown function	0.998861	0.0163854	0.49961	24.1462	19.7969	17.0653	31.2384	27.6511	62.9817
GSU2504	omcS	electron transport	1.06515	0.0219972	0.49961	279.565	280.86	324.361	389.627	409.43	1052.37
GSU3242		hypothetical/protein of unknown function	1.12711	0.00526302	0.49961	10.4795	5.12068	6.1658	15.6192	18.8263	13.0233
GSU2503	omcT	electron transport	1.15311	0.0210314	0.49961	65.0982	79.3706	82.1045	106.902	104.385	292.705
GSU2420	mvhF	electron transport	1.24383	0.0215483	0.49961	0.482924	0.594365	0.159117	0.853509	1.0926	0.939389
GSU2098	cooS	metabolism	1.40886	0.00150367	0.49961	20.0414	26.0606	33.0168	86.7592	79.1293	44.3648
GSU1080		hypothetical/protein of unknown function	4.46481	0.0401387	0.49961	0.338047	1.37161	0.517131	48.4366	0.672368	0.298896

## Sheet: log2FC <= -0.58 (DOWNREGULATED)
locustag	gene	category	log2fc	pval	padj	NB_A_CPM	NB_B_CPM	NB_C_CPM	DB_A_CPM	DB_B_CPM	DB_C_CPM
GSU2122		signaling	-4.19089	0.0204241	0.49961	320.807	9.09836	8.31388	6.01724	5.00073	7.47241
GSU0705		electron transport	-1.69547	0.0437099	0.49961	9.36873	7.45242	50.838	7.25483	6.51356	7.17351
GSU1652		hypothetical/protein of unknown function	-1.53226	0.0477616	0.49961	38.7788	29.0324	181.036	27.1416	26.6426	32.3235
GSU0836	rnk-2	transcriptional regulation	-1.36757	0.0242448	0.49961	1.01414	1.41733	0.477352	0.256053	0.336184	0.512394
GSU0762		hypothetical/protein of unknown function	-1.13817	0.0215669	0.49961	0.579509	1.28017	0.954704	0.46943	0.294161	0.512394
GSU3563		hypothetical/protein of unknown function	-1.08889	0.0088148	0.49961	1.2556	0.868687	1.23316	0.682807	0.462253	0.426995
GSU1278		hypothetical/protein of unknown function	-1.05503	0.0361983	0.49961	80.8415	185.259	52.5087	49.1621	53.7894	50.3427
GSU3497		hypothetical/protein of unknown function	-0.96672	0.00507772	0.49961	3.71852	3.33759	3.81882	2.04842	2.22722	1.28098
GSU0837		signaling	-0.940653	0.0111869	0.49961	2.75267	2.0117	2.18786	0.810834	1.34474	1.45178
GSU2140		DNA replication and repair	-0.876859	0.00438831	0.49961	4.87754	3.79479	3.22213	2.21912	2.1852	2.04958
GSU1567	htpX-2	protein modification	-0.855882	0.0277479	0.49961	12.4112	12.9389	26.5726	9.51663	10.884	8.3264
GSU3500		hypothetical/protein of unknown function	-0.834917	0.029816	0.49961	4.00827	2.83466	3.18235	2.64588	1.76497	1.19559
GSU3060		transcriptional regulation	-0.819872	0.0467593	0.49961	92.3351	93.6353	73.91	34.9085	32.1896	80.1042
GSU2176		hypothetical/protein of unknown function	-0.792522	0.0249949	0.49961	1.44877	1.82882	1.59117	1.15224	0.630345	1.02479
GSU1013		transporter	-0.76153	0.0391264	0.49961	344.953	227.779	590.405	233.776	216.334	236.085
GSU3571		hypothetical/protein of unknown function	-0.751819	0.00759571	0.49961	3.91169	2.88038	3.10279	1.96307	1.80699	2.09227
GSU2149		transcriptional regulation	-0.744959	0.0488049	0.49961	4.15315	2.4689	1.90941	1.79237	1.51283	1.75068
GSU2395		hypothetical/protein of unknown function	-0.733794	0.0294465	0.49961	5.50534	2.83466	3.97793	2.7739	2.35329	2.26307
GSU2353		hypothetical/protein of unknown function	-0.662894	0.0013887	0.49961	103.925	85.4971	89.6626	62.7756	61.9839	51.4956
GSU1521	ihfA-1	DNA replication and repair	-0.65138	0.0124112	0.49961	326.988	221.607	399.424	208	203.938	191.678
GSU3083		DNA replication and repair	-0.640389	0.0459809	0.49961	1.69024	2.78894	2.26742	1.19491	1.72294	1.40908
GSU3506		hypothetical/protein of unknown function	-0.631258	0.00263985	0.49961	15.8399	18.151	16.7073	10.7115	11.7664	10.2479
GSU2094		signaling	-0.62075	0.0388578	0.49961	1.78682	1.96598	2.5061	1.57899	1.0926	1.40908
GSU0381		cell envelope	-0.620383	0.0154766	0.49961	6.32631	5.76077	4.33595	3.54206	3.57195	3.54406
GSU3543		metabolism	-0.619046	0.0368096	0.49961	4.92583	3.47475	4.33595	3.54206	2.43733	2.30577
GSU2693		signaling	-0.60433	0.0130673	0.49961	26.2228	24.1404	18.1394	13.9122	13.8676	17.2506
GSU2123		unsure	-0.601333	0.00770451	0.49961	8.35459	7.45242	6.76249	5.07838	5.1268	4.65424
