# Supplementary material
Source: Research Square preprint supplement (doi:10.21203/rs.3.rs-8864095/v1)
Supplement: Supplementary file 2 [file 8e0996d4e91ab1bb770f0c1c.xlsx]

## Sheet: (A) all_quantified_proteins
Protein.Group	Protein.Ids	Protein.Names	log2fc	pval	padj	NB.NA	DB.NA	NB1	NB2	NB3	DB1	DB2	DB3
A0A4W3.1	A0A4W3.1;WP_324310778.1;WP_254278081.1;WP_119333270.1;WP_010943173.1;BEH09520.1;UTG91887.1;UAC03233.1;QVW34362.1;BBA70966.1;AJY68826.1;ADI85294.1;AAR35910.1	SPEA_GEOSL	0.457756	0.0466889	0.970495	0	0	3760000	2730000	2910000	3860000	4350000	4700000
AAP13978.1;AAR35309.1;ADI84771.1;AJY68180.1;QVW33886.1;UAC02673.1;UTG91394.1;WP_010942578.1	WP_324309958.1;WP_286352400.1;WP_119332823.1;WP_010942578.1;BEH10067.1;UTG91394.1;UAC02673.1;QVW33886.1;BBA70430.1;AAP13978.1;AJY68180.1;ADI84771.1;AAR35309.1	FusA,;elongation;translation	0.191578	0.155735	0.970495	0	0	17000000	17600000	16100000	19200000	21300000	17400000
AAR33336.1;ADI82865.1;AJY69718.1;QVW35277.1;UAC04114.1;UTG92752.1;WP_010940679.1	WP_119331364.1;WP_010940679.1;BEH08390.1;UTG92752.1;UAC04114.1;QVW35277.1;BBA68566.1;AJY69718.1;ADI82865.1;AAR33336.1	DNA	0.0562647	0.823721	0.991407	0	0	8270000	9100000	5260000	7860000	8320000	7350000
AAR33338.1;ADI82867.1;AJY69719.1;QVW35278.1;UAC04116.1;UTG92753.1;WP_010940681.1	WP_119331365.1;WP_010940681.1;BEH08392.1;UTG92753.1;UAC04116.1;QVW35278.1;BBA68568.1;AJY69719.1;ADI82867.1;AAR33338.1	DNA	0.0919566	0.461461	0.970495	0	0	5970000	4820000	4860000	5760000	5480000	5440000
AAR33339.1;ADI82868.1;AJY69720.1;QVW35279.1;UAC04117.1;UTG92754.1;WP_010940682.1	BEH08393.1;UTG92754.1;UAC04117.1;QVW35279.1;WP_119331366.1;WP_010940682.1;BBA68569.1;AJY69720.1;ADI82868.1;AAR33339.1	DNA	-0.0502513	0.71509	0.97447	0	0	8760000	7040000	7570000	8280000	7570000	6720000
AAR33340.2;ADI82869.1;AJY69721.1;QVW35280.1;UAC04118.1;UTG92755.1;WP_010940683.1;WP_014551225.1	WP_286351089.1;BEH08394.1;WP_119331367.1;WP_014551225.1;WP_010940683.1;UTG92755.1;UAC04118.1;QVW35280.1;BBA68570.1;AJY69721.1;AAR33340.2;ADI82869.1	HEAT;hypothetical	0.241546	0.446989	0.970495	0	0	747594	479114	855510	729339	712381	1020000
AAR33342.1;ADI82871.1;AJY69723.1;QVW35282.1;UAC04120.1;UTG92757.1;WP_010940685.1;WP_014551226.1	WP_119331368.1;WP_286351091.1;WP_014551226.1;WP_010940685.1;WP_324309176.1;BEH08396.1;UTG92757.1;UAC04120.1;QVW35282.1;BBA68572.1;AJY69723.1;ADI82871.1;AAR33342.1	ATP-binding;HAMP;histidine;sensor	0.172638	0.632804	0.970495	1	0	703237	691832	762172	835050	516415	1080000
AAR33343.1;ADI82872.1;AJY69724.1;QVW35283.1;UAC04121.1;UTG92758.1;WP_010940686.1	WP_119331369.1;WP_286351092.1;WP_010940686.1;WP_324309177.1;BEH08397.1;UTG92758.1;UAC04121.1;QVW35283.1;BBA68573.1;AJY69724.1;ADI82872.1;AAR33343.1	histidine;response	0.276721	0.219153	0.970495	0	0	1670000	1710000	2390000	2450000	2280000	2260000
AAR33344.1;ADI82873.1;AJY69725.1;BBA68574.1;QVW35284.1;UAC04122.1;UTG92759.1;WP_010940687.1;WP_014551227.1;WP_119331370.1	WP_119331370.1;WP_014551227.1;WP_010940687.1;UTG92759.1;UAC04122.1;QVW35284.1;BBA68574.1;AJY69725.1;ADI82873.1;AAR33344.1	PAS;Phytochrome-like;histidine;sensor	-0.0464811	0.902279	0.9965	0	0	516665	336970	721302	473577	619039	432388
AAR33345.1;ADI82874.1;AJY69726.1;QVW35285.1;UAC04123.1;UTG92760.1;WP_010940688.1;WP_014551228.1	WP_286351094.1;WP_014551228.1;WP_010940688.1;WP_119331371.1;BEH08399.1;UTG92760.1;UAC04123.1;QVW35285.1;BBA68575.1;AJY69726.1;ADI82874.1;AAR33345.1	ATP-binding;flagellar;histidine;response	0.0539776	0.855338	0.991862	0	0	1540000	2780000	2500000	1990000	2780000	2310000
AAR33346.1;ADI82875.1;AJY69727.1;BBA68576.1;BEH08400.1;QVW35286.1;UAC04124.1;UTG92761.1;WP_010940689.1;WP_119331372.1;WP_286351095.1	WP_119331372.1;WP_286351095.1;BEH08400.1;UTG92761.1;UAC04124.1;QVW35286.1;BBA68576.1;WP_010940689.1;AJY69727.1;ADI82875.1;AAR33346.1	ABC;Daunorubicin/doxorubicin;MULTISPECIES:;daunorubicin	0.0316617	0.898543	0.9965	0	0	783875	801298	914102	736598	718133	1100000
AAR33347.1;AJY69728.1;UAC04125.1;UTG92762.1;WP_010940690.1	WP_324309178.1;WP_286351096.1;BEH08401.1;UTG92762.1;UAC04125.1;WP_010940690.1;AJY69728.1;AAR33347.1	protoporphyrinogen	-0.0153506	0.929529	1	0	0	10600000	10100000	8590000	11400000	9220000	8360000
AAR33348.1;ADI82877.1;AJY69729.1;BBA68578.1;BEH08402.1;QVW35288.1;UAC04126.1;UTG92763.1	BEH08402.1;UTG92763.1;UAC04126.1;QVW35288.1;BBA68578.1;AJY69729.1;ADI82877.1;AAR33348.1	MarR;hypothetical;winged	0.606086	0.475331	0.970495	0	0	303095	84656	128812	353811	79193	353269
AAR33349.1;ADI82878.1;AJY69730.1;QVW35289.1;UAC04127.1;UTG92764.1;WP_010940692.1	WP_010940692.1;UTG92764.1;UAC04127.1;QVW35289.1;AJY69730.1;ADI82878.1;AAR33349.1	DnaJ;DnaJ-related;integrase	0.240433	0.511548	0.970495	0	0	1810000	1040000	1010000	1310000	1890000	1360000
AAR33350.1;ADI82879.1;AJY69731.1;QVW35290.1;UAC04128.1;UTG92765.1;WP_010940693.1	WP_010940693.1;UTG92765.1;UAC04128.1;QVW35290.1;AJY69731.1;ADI82879.1;AAR33350.1	peptidylprolyl	-0.126547	0.323566	0.970495	0	0	5520000	5980000	5290000	4440000	5580000	5360000
AAR33351.1;AJY69732.1;UAC04129.1;UTG92766.1;WP_010940694.1	WP_119331376.1;WP_014551231.1;WP_010940694.1;WP_286351099.1;BEH08405.1;UTG92766.1;UAC04129.1;QVW35291.1;BBA68581.1;AJY69732.1;ADI82880.1;AAR33351.1	peptidylprolyl	-0.0142469	0.935396	1	0	0	6470000	5890000	4940000	6440000	5890000	4800000
AAR33352.1;ADI82881.1;AJY69733.1;QVW35292.1;UAC04130.1;UTG92767.1;WP_010940695.1	WP_324309180.1;WP_286351100.1;WP_119331377.1;WP_010940695.1;BEH08406.1;UTG92767.1;UAC04130.1;QVW35292.1;BBA68582.1;AJY69733.1;ADI82881.1;AAR33352.1	helicase;transcription-repair	0.0467259	0.80729	0.990742	0	0	3220000	3680000	4340000	3350000	3740000	4520000
AAR33353.1;ADI82882.1;AJY69734.1;BBA68583.1;CBF67215.1;CBU92088.1;QVW36876.1;UAC05743.1;UTG94376.1;WP_010940696.1;WP_275450049.1;WP_331838607.1	WP_349256830.1;WP_331838607.1;BEH08407.1;WP_275450049.1;WP_010940696.1;UTG94376.1;UAC05743.1;QVW36876.1;BBA68583.1;AJY69734.1;ADI82882.1;AAR33353.1;CBU92088.1;CBF67215.1	GntR;HTH-type;PLP-dependent;helix-turn-helix;unnamed	0.0041786	0.991122	1	0	0	668640	636386	581148	513622	461116	916907
AAR33355.1;ADI82884.1;AJY69736.1;BBA68585.1;QVW35294.1;UAC04132.1;UTG92769.1;WP_010940698.1;WP_119331380.1	WP_119331380.1;WP_010940698.1;UTG92769.1;UAC04132.1;QVW35294.1;BBA68585.1;AJY69736.1;ADI82884.1;AAR33355.1	gamma;hypothetical;protein;transferase	0.232114	0.634675	0.970495	0	0	1480000	1000000	662980	1760000	935246	996355
AAR33358.1;ADI82887.2;AJY71899.1;QVW35297.1;UAC05744.1;UTG92772.1;WP_010940701.1	BEH08412.1;UTG92772.1;UAC05744.1;QVW35297.1;WP_119334003.1;WP_010940701.1;BBA68588.1;AJY71899.1;ADI82887.2;AAR33358.1	TPR;tol-pal	0.217023	0.226573	0.970495	0	0	4470000	4140000	4080000	5720000	4430000	4600000
AAR33359.1;ADI82888.1;AJY69739.1;BBA68589.1;QVW35298.1;UAC04135.1;UTG92773.1;WP_010940702.1;WP_045667800.1	UTG92773.1;UAC04135.1;QVW35298.1;WP_010940702.1;WP_045667800.1;BBA68589.1;AJY69739.1;ADI82888.1;AAR33359.1	Outer;peptidoglycan-associated;peptidoglycan-binding	0.0755758	0.544405	0.970495	0	0	22100000	19900000	17500000	21400000	22100000	19200000
AAR33362.1;ADI82891.1;AJY69742.1;BBA68592.1;BEH08416.1;QVW35301.1;UAC04138.1;UTG92776.1	BEH08416.1;UTG92776.1;UAC04138.1;QVW35301.1;BBA68592.1;AJY69742.1;ADI82891.1;AAR33362.1	Biopolymer;biopolymer;protein	0.298736	0.385218	0.970495	0	0	1550000	933219	809286	1310000	1360000	1380000
AAR33363.1;ADI82892.1;AJY69743.1;BBA68593.1;BEH08417.1;QVW35302.1;UAC04139.1;UTG92777.1	BEH08417.1;UTG92777.1;UAC04139.1;QVW35302.1;BBA68593.1;AJY69743.1;ADI82892.1;AAR33363.1	Biopolymer;biopolymer;flagellar;protein	-0.110558	0.629334	0.970495	0	0	17900000	12100000	18800000	16100000	14500000	14600000
AAR33364.1;ADI82893.1;AJY69744.1;BBA68594.1;QVW35303.1;UAC04140.1;UTG92778.1;WP_010940707.1;WP_119331385.1	BEH08418.1;UTG92778.1;UAC04140.1;QVW35303.1;WP_119331385.1;BBA68594.1;WP_010940707.1;AJY69744.1;ADI82893.1;AAR33364.1	2-oxoglutaramate;carbon-nitrogen;nitrilase/amidohydrolase	-0.290912	0.473175	0.970495	0	0	3900000	6240000	3550000	2510000	4240000	4440000
AAR33371.1;ADI82900.1;AJY69750.1;QVW35309.1;UAC04147.1;UTG92785.1;WP_010940714.1	WP_010940714.1;UTG92785.1;UAC04147.1;QVW35309.1;AJY69750.1;ADI82900.1;AAR33371.1	CapA;capsular;poly-gamma-glutamate	0.338934	0.519565	0.970495	1	0	146268	53310	183148	149893	213728	120459
AAR33388.1;UAC04161.1;WP_010940731.1	WP_010940731.1;UAC04161.1;AAR33388.1	CRISPR-associated;type	-0.027777	0.807162	0.990742	0	0	4940000	4200000	3970000	4120000	4320000	4420000
AAR33396.1;AJY69795.1;UAC04167.1;WP_010940738.1;pdb|2RDC|A;pdb|2RDC|B	WP_010940738.1;pdb|2RDC|B;pdb|2RDC|A;UAC04167.1;AJY69795.1;AAR33396.1	Chain;DUF3232;hypothetical;protein	-0.666957	0.125043	0.970495	0	0	228434	306675	222275	233970	107973	135083
AAR33401.1;ADI82905.1;BEH08430.1;QVW35348.1;UAC04172.1;UTG92789.1;WP_010940744.1;WP_119331404.1;WP_324309196.1	WP_324309196.1;BEH08430.1;WP_119331404.1;WP_010940744.1;UTG92789.1;UAC04172.1;QVW35348.1;BBA68618.1;ADI82905.1;AAR33401.1	AhpC/TSA;peroxiredoxin-like	0.0381072	0.917987	0.999308	1	0	384615	315453	383324	265418	316393	530579
AAR33408.1;ADI82911.1;AJY69804.1;BEH08436.1;QVW35354.1;UAC04178.1;UTG92795.1	BEH08436.1;UTG92795.1;UAC04178.1;QVW35354.1;AJY69804.1;ADI82911.1;AAR33408.1	membrane;outer;porin	-0.331535	0.359327	0.970495	0	0	24600000	18600000	13300000	17100000	14100000	13700000
AAR33409.1;ADI82912.1;AJY69805.1;UAC04179.1;UTG92796.1;WP_010940751.1	BEH08437.1;UTG92796.1;UAC04179.1;WP_214302866.1;QVW35355.1;WP_010940751.1;WP_119331410.1;BBA68625.1;AJY69805.1;ADI82912.1;AAR33409.1	isoprenoid;isoprenylcysteine	-0.349782	0.119112	0.970495	0	0	6850000	5420000	5380000	4990000	5070000	3790000
AAR33410.1;ADI82913.1;AJY69806.1;BBA68626.1;QVW35356.1;UAC04180.1;UTG92797.1;WP_010940752.1;WP_119331411.1;WP_254278251.1	WP_119331411.1;WP_192905879.1;WP_010940752.1;WP_254278251.1;BEH08438.1;UTG92797.1;UAC04180.1;QVW35356.1;BBA68626.1;AJY69806.1;ADI82913.1;AAR33410.1	3;NAD(P)H-binding;NADH-binding;SDR_a2	-0.135292	0.890095	0.995781	0	1	912363	62530	399440	223003	417712	610595
AAR33414.1;ADI82917.1;AJY69810.1;BBA68630.1;BEH08442.1;QVW35360.1;UAC04184.1;UTG92801.1;WP_010940756.1	WP_010940756.1;BEH08442.1;UTG92801.1;UAC04184.1;QVW35360.1;BBA68630.1;AJY69810.1;ADI82917.1;AAR33414.1	Cro/Cl;HTH-type;XRE;helix-turn-helix	-0.142652	0.509179	0.970495	0	0	2630000	2110000	3120000	2060000	2530000	2530000
AAR33415.1;ADI82918.1;AJY71905.1;CBF75023.1;CBF79878.1;CBF82568.1;CBF92422.1;CBF93959.1;CBF97479.1;CBG03475.1;CBG04276.1;CBG05141.1;CBG10941.1;CBG11618.1;CBU96929.1;CBU99233.1;CBV00439.1;CBV05942.1;CBV07479.1;CBV10999.1;CBV16995.1;CBV17798.1;CBV18663.1;CBV24463.1;CBV25132.1;QVW36879.1;UAC05747.1;UTG94378.1;WP_010940757.1;WP_014551234.1	WP_324309733.1;BEH08443.1;UTG94378.1;UAC05747.1;QVW36879.1;WP_119334007.1;BBA68631.1;WP_014551234.1;WP_010940757.1;AJY71905.1;ADI82918.1;AAR33415.1;CBV25132.1;CBV24463.1;CBV07479.1;CBV00439.1;CBU96929.1;CBV18663.1;CBV17798.1;CBV16995.1;CBV10999.1;CBV05942.1;CBU99233.1;CBG05141.1;CBF97479.1;CBG04276.1;CBG11618.1;CBG10941.1;CBG03475.1;CBF93959.1;CBF92422.1;CBF75023.1;CBF82568.1;CBF79878.1	DegQ;peptidase;periplasmic;unnamed	-0.032797	0.731456	0.979914	0	0	7750000	7190000	8640000	7930000	7830000	7290000
AAR33417.1;ADI82920.1;AJY69812.1;BBA68633.1;BEH08445.1;QVW35362.1;UAC04186.1;UTG92803.1;WP_010940759.1;WP_039647382.1;WP_119334008.1;WP_286352544.1	WP_039647382.1;WP_010940759.1;WP_286352544.1;WP_119334008.1;BEH08445.1;UTG92803.1;UAC04186.1;QVW35362.1;BBA68633.1;AJY69812.1;ADI82920.1;AAR33417.1	23S;MULTISPECIES:;Ribosomal;RluA;pseudouridine	0.164671	0.679774	0.973029	0	0	1370000	746534	1170000	763911	1500000	1420000
AAR33418.1;ADI82921.1;AJY69813.1;QVW35363.1;UAC04187.1;UTG92804.1;WP_010940760.1	BEH08446.1;UTG92804.1;UAC04187.1;QVW35363.1;WP_119331414.1;WP_010940760.1;BBA68634.1;AJY69813.1;ADI82921.1;AAR33418.1	laccase;peptidoglycan	-0.467527	0.171335	0.970495	0	0	5410000	6430000	4020000	3720000	3010000	4740000
AAR33419.1;ADI82922.1;AJY69814.1;QVW35364.1;UAC04188.1;UTG92805.1;WP_010940761.1;WP_214302867.1	UTG92805.1;UAC04188.1;WP_214302867.1;QVW35364.1;WP_010940761.1;AJY69814.1;ADI82922.1;AAR33419.1	amino;aminotransferase	0.46302	0.0433662	0.952267	0	0	519363	639477	660530	754082	955685	798096
AAR33420.1;ADI82923.1;AJY69815.1;BEH08448.1;QVW35365.1;UAC04189.1;UTG92806.1;WP_010940762.1;WP_045667849.1	BEH08448.1;UTG92806.1;UAC04189.1;QVW35365.1;WP_119331416.1;WP_045667849.1;WP_010940762.1;BBA68636.1;AJY69815.1;ADI82923.1;AAR33420.1	FAD/NAD(P)-binding;heterodisulfide	-0.188815	0.67476	0.973029	0	0	1180000	1500000	1180000	1760000	792343	834135
AAR33422.1;ADI82925.1;AJY69817.1;QVW35367.1;UAC04191.1;UTG92808.1;WP_010940764.1;WP_214302869.1	WP_119331418.1;WP_214302869.1;WP_286351132.1;WP_010940764.1;WP_324309217.1;BEH08450.1;UTG92808.1;UAC04191.1;QVW35367.1;BBA68638.1;AJY69817.1;ADI82925.1;AAR33422.1	4Fe-4S;heterodisulfide	0.0753727	0.646612	0.972476	0	0	1790000	1740000	2250000	2150000	1770000	2170000
AAR33423.1;ADI82926.1;AJY69818.1;QVW35368.1;UAC04192.1;UTG92809.1;WP_010940765.1	WP_324309219.1;WP_119331419.1;WP_010940765.1;BEH08451.1;UTG92809.1;UAC04192.1;QVW35368.1;BBA68639.1;AJY69818.1;ADI82926.1;AAR33423.1	4Fe-4S;Fe-S;heterodisulfide	0.301816	0.243043	0.970495	0	0	1850000	2120000	2820000	2740000	2380000	3250000
AAR33424.1;ADI82927.1;AJY69819.1;BBA68640.1;BEH08452.1;QVW35369.1;UAC04193.1;UTG92810.1;WP_010940766.1;WP_014551235.1;WP_119331420.1;WP_324309221.1	WP_119331420.1;WP_014551235.1;WP_010940766.1;WP_324309221.1;BEH08452.1;UTG92810.1;UAC04193.1;QVW35369.1;BBA68640.1;AJY69819.1;ADI82927.1;AAR33424.1	heterodisulfide;hydrogenase;hypothetical	0.65007	0.320892	0.970495	0	0	523614	251454	1230000	992043	1180000	974398
AAR33425.1;ADI82928.1;AJY69820.1;BBA68641.1;BEH08453.1;QVW35370.1;UAC04194.1;UTG92811.1;WP_010940767.1;WP_119331421.1;WP_254278253.1	BEH08453.1;WP_254278253.1;UTG92811.1;UAC04194.1;QVW35370.1;WP_119331421.1;BBA68641.1;WP_010940767.1;AJY69820.1;ADI82928.1;AAR33425.1	CoB--CoM;disulfide;heterodisulfide;hypothetical	0.300318	0.554482	0.970495	0	0	567717	759953	797991	659157	628416	1330000
AAR33426.1;ADI82929.1;AJY69821.1;BBA68642.1;BEH08454.1;QVW35371.1;UAC04195.1;UTG92812.1;WP_010940768.1;WP_119331422.1;WP_214302870.1	BEH08454.1;UTG92812.1;UAC04195.1;WP_214302870.1;QVW35371.1;WP_119331422.1;WP_010940768.1;BBA68642.1;AJY69821.1;ADI82929.1;AAR33426.1	CoB--CoM;heterodisulfide;hypothetical	0.193468	0.802621	0.990742	0	0	763874	179249	204013	364848	485103	461810
AAR33427.2;ADI82930.1;AJY69822.1;BBA68643.1;BEH08455.1;QVW35372.1;UAC04196.1;UTG92813.1;WP_010940769.1;WP_039647364.1;WP_119331423.1	WP_119331423.1;WP_039647364.1;WP_010940769.1;BEH08455.1;UTG92813.1;UAC04196.1;QVW35372.1;BBA68643.1;AJY69822.1;AAR33427.2;ADI82930.1	4Fe-4S;MULTISPECIES:;heterodisulfide;hypothetical	0.20896	0.432874	0.970495	0	0	1080000	868171	1400000	1230000	1530000	1110000
AAR33428.2;ADI82932.2;AJY71906.1;QVW35373.1;UAC04197.1;UTG92814.1;WP_010940770.1;WP_214302871.1;WP_254278254.1	WP_254278254.1;WP_214302871.1;WP_010940770.1;UTG92814.1;UAC04197.1;QVW35373.1;AJY71906.1;AAR33428.2;ADI82932.2	ABC	0.120573	0.709583	0.974322	0	1	1980000	1960000	3270000	2050000	2950000	2.83847e+06
AAR33430.1;ADI82934.2;AJY69835.1;BEH08458.1;QVW35375.1;UAC04199.1;UTG92816.1	WP_119331425.1;BEH08458.1;UTG92816.1;UAC04199.1;QVW35375.1;BBA68646.1;AJY69835.1;ADI82934.2;AAR33430.1	DNA-binding;YbaB/EbfC;nucleoid-associated	-0.0131582	0.9104	0.999308	0	0	2750000	2210000	2750000	2500000	2500000	2640000
AAR33432.1;ADI82936.1;AJY69837.1;QVW35377.1;UAC04201.1;UTG92818.1;WP_010940774.1	WP_324309278.1;WP_286351140.1;BEH08460.1;UTG92818.1;UAC04201.1;QVW35377.1;WP_010940774.1;WP_119331427.1;BBA68648.1;AJY69837.1;ADI82936.1;AAR33432.1	pyruvate-flavodoxin;pyruvate:ferredoxin;pyruvate:ferredoxin/flavodoxin	-0.0196288	0.769262	0.986752	0	0	165000000	181000000	172000000	178000000	174000000	159000000
AAR33433.1;ADI82937.1;AJY69838.1;BBA68649.1;QVW35378.1;UAC04202.1;UTG92819.1;WP_010940775.1	WP_039647353.1;WP_010940775.1;BEH08461.1;UTG92819.1;UAC04202.1;QVW35378.1;BBA68649.1;AJY69838.1;ADI82937.1;AAR33433.1	cell;dynein;hypothetical;roadblock/LC7	0.386137	0.0314128	0.948398	0	0	2940000	3660000	2980000	4030000	4500000	3990000
AAR33434.1;ADI82938.1;AJY69839.1;QVW35379.1;UAC04203.1;UTG92820.1;WP_010940776.1	WP_039647351.1;WP_010940776.1;BEH08462.1;UTG92820.1;UAC04203.1;QVW35379.1;BBA68650.1;AJY69839.1;ADI82938.1;AAR33434.1	GTP-binding;GTPase;cell;gliding-motility	0.0724148	0.693956	0.973443	0	0	9820000	12600000	9440000	10300000	10400000	12800000
AAR33437.1;ADI82940.1;AJY69841.1;QVW35381.1;UAC04205.1;UTG92822.1;WP_010940778.1	WP_119331429.1;WP_010940778.1;UTG92822.1;UAC04205.1;QVW35381.1;BBA68652.1;AJY69841.1;ADI82940.1;AAR33437.1	selenocysteine-specific;translation	0.0918389	0.496628	0.970495	0	0	3700000	3410000	3540000	3460000	3550000	4340000
AAR33439.1;ADI82942.1;AJY69842.1;QVW35383.1;UAC04207.1;UTG92824.1;WP_010940780.1	WP_119331430.1;WP_010940780.1;WP_286351144.1;BEH08466.1;UTG92824.1;UAC04207.1;QVW35383.1;BBA68654.1;AJY69842.1;ADI82942.1;AAR33439.1	chemotaxis;response	0.395769	0.313591	0.970495	0	0	349029	415929	236936	305297	558486	454353
AAR33441.1;ADI82944.1;AJY69844.1;BBA68656.1;QVW35385.1;UAC04209.1;UTG92826.1;WP_010940782.1	WP_010940782.1;WP_286351146.1;BEH08468.1;UTG92826.1;UAC04209.1;QVW35385.1;BBA68656.1;AJY69844.1;ADI82944.1;AAR33441.1	AAA;ParA;Sporulation;chromosome	0.210358	0.36167	0.970495	0	0	1060000	937377	1120000	1340000	926728	1340000
AAR33442.2;ADI82945.1;AJY69845.1;QVW35386.1;UAC04210.1;UTG92827.1;WP_010940783.1	UTG92827.1;UAC04210.1;QVW35386.1;WP_119331431.1;WP_010940783.1;BBA68657.1;AJY69845.1;ADI82945.1;AAR33442.2	ParB-like;ParB/RepB/Spo0J;plasmid	0.207085	0.0746644	0.970495	0	0	2610000	2550000	2420000	3130000	2690000	2930000
AAR33443.1;ADI82946.1;AJY69846.1;BBA68658.1;BEH08470.1;QVW35387.1;UAC04211.1;UTG92828.1;WP_014551237.1;WP_324309289.1	WP_324309289.1;BEH08470.1;UTG92828.1;UAC04211.1;QVW35387.1;WP_014551237.1;BBA68658.1;AJY69846.1;ADI82946.1;AAR33443.1	ATP	-0.239791	0.445456	0.970495	0	0	3050000	3560000	2010000	2350000	2160000	2790000
AAR33450.2;ADI82953.2;AJY71909.1;BBA68665.1;QVW35394.1;UAC05748.1;UTG92835.1;WP_010940791.1;WP_119334011.1	WP_324309295.1;BEH08477.1;UTG92835.1;UAC05748.1;QVW35394.1;WP_119334011.1;WP_010940791.1;BBA68665.1;AJY71909.1;AAR33450.2;ADI82953.2	4-hydroxythreonine-4-phosphate	-0.0231167	0.956707	1	0	0	246862	386956	219312	341823	334771	162975
AAR33452.1;ADI82955.1;AJY69854.1;CBF80295.1;CBU99425.1;QVW35396.1;UAC04219.1;UTG92837.1;WP_010940793.1	BEH08479.1;UTG92837.1;UAC04219.1;QVW35396.1;WP_010940793.1;AJY69854.1;ADI82955.1;AAR33452.1;CBU99425.1;CBF80295.1	amino;aminotransferase;pyridoxal;unnamed	-0.0498707	0.798794	0.990681	0	0	8960000	11200000	7800000	9780000	7930000	9300000
AAR33453.1;ADI82956.1;AJY69855.1;BBA68668.1;BEH08480.1;QVW35397.1;UAC04220.1;UTG92838.1;WP_010940794.1;WP_119331437.1	BEH08480.1;UTG92838.1;UAC04220.1;QVW35397.1;WP_119331437.1;BBA68668.1;AJY69855.1;ADI82956.1;AAR33453.1;WP_010940794.1	hypothetical	0.250372	0.387287	0.970495	0	0	1280000	689897	997703	1130000	1130000	1270000
AAR33454.2;ADI82957.1;AJY69856.1;BBA68669.1;QVW35398.1;UAC04221.1;WP_010940795.1	WP_010940795.1;WP_254278257.1;WP_286351156.1;BEH08481.1;UTG92839.1;UAC04221.1;QVW35398.1;BBA68669.1;AJY69856.1;AAR33454.2;ADI82957.1	VOC;glyoxalase;glyoxalase/bleomycin;hypothetical	0.249901	0.366562	0.970495	0	0	11500000	16300000	14500000	17300000	20200000	12800000
AAR33457.2;ADI82960.1;AJY69859.1;QVW35400.1;UAC04223.1;WP_010940798.1	WP_324309302.1;BEH08484.1;WP_254278259.1;UTG92841.1;UAC04223.1;QVW35400.1;WP_119331440.1;BBA68672.1;WP_010940798.1;AJY69859.1;AAR33457.2;ADI82960.1	hydrogenase;nickel-dependent;periplasmically	-0.452713	0.449646	0.970495	0	0	541466	346421	187364	321480	211446	252725
AAR33460.1;ADI82963.1;AJY69862.1;QVW35403.1;UAC04226.1;UTG92844.1;WP_010940801.1	WP_324309305.1;BEH08487.1;UTG92844.1;UAC04226.1;QVW35403.1;WP_119331443.1;BBA68675.1;WP_010940801.1;AJY69862.1;ADI82963.1;AAR33460.1	lactate;protein	0.177613	0.396037	0.970495	0	0	6440000	5890000	8050000	6360000	8590000	8100000
AAR33463.1;ADI82967.1;AJY69864.1;QVW35406.1;UAC04229.1;UTG92847.1;WP_010940804.1	WP_119331446.1;WP_010940804.1;UTG92847.1;UAC04229.1;QVW35406.1;BBA68678.1;AJY69864.1;ADI82967.1;AAR33463.1	primosomal;replication	-0.0048245	0.983265	1	0	0	1170000	1110000	1200000	1220000	848382	1400000
AAR33464.2;ADI82968.1;AJY69865.1;BBA68679.1;QVW35407.1;UAC04230.1;UTG92848.1;WP_010940805.1;WP_119331447.1	BEH08491.1;UTG92848.1;WP_119331447.1;WP_010940805.1;UAC04230.1;QVW35407.1;BBA68679.1;AJY69865.1;AAR33464.2;ADI82968.1	Peptide;peptide;polypeptide	0.169568	0.669198	0.97248	0	0	1650000	1800000	1040000	1180000	2300000	1570000
AAR33467.1;ADI82971.1;AJY69868.1;QVW35410.1;UAC04233.1;UTG92851.1;WP_010940808.1	WP_010940808.1;UTG92851.1;UAC04233.1;QVW35410.1;AJY69868.1;ADI82971.1;AAR33467.1	chemotaxis;protein	-0.0466609	0.917131	0.999308	0	0	405976	578102	835786	539620	404731	817595
AAR33468.1;ADI82972.2;AJY69870.1;QVW35411.1;UAC04234.1;UTG92852.1;WP_010940809.1	WP_010940809.1;UTG92852.1;UAC04234.1;QVW35411.1;AJY69870.1;ADI82972.2;AAR33468.1	exonuclease;hypothetical;recombination-associated	-0.264238	0.487737	0.970495	0	0	7450000	7860000	3870000	5450000	5450000	5070000
AAR33470.1;ADI82974.1;AJY69872.1;BBA68685.1;BEH08497.1;QVW35413.1;UAC04236.1;UTG92854.1	BEH08497.1;UTG92854.1;UAC04236.1;QVW35413.1;BBA68685.1;AJY69872.1;ADI82974.1;AAR33470.1	Delta-aminolevulinic;delta-aminolevulinic;porphobilinogen	-0.0133971	0.95588	1	0	0	12700000	13700000	8220000	11700000	11900000	10700000
AAR33471.1;ADI82975.1;AJY69873.1;BEH08498.1;QVW35414.1;UAC04237.1;UTG92855.1;WP_010940812.1;WP_286351170.1	WP_010940812.1;WP_286351170.1;BEH08498.1;UTG92855.1;UAC04237.1;QVW35414.1;AJY69873.1;ADI82975.1;AAR33471.1	DoxX;MULTISPECIES:	-0.622569	0.131958	0.970495	0	0	2630000	2840000	1720000	1490000	2060000	1120000
AAR33472.1;ADI82976.1;AJY69874.1;BBA68687.1;QVW35415.1;UAC04238.1;UTG92856.1;WP_010940813.1;WP_119331454.1	WP_010940813.1;WP_119331454.1;UTG92856.1;UAC04238.1;QVW35415.1;BBA68687.1;AJY69874.1;ADI82976.1;AAR33472.1	PilZ;hypothetical;pilus	-0.405962	0.55296	0.970495	0	0	587344	419482	1270000	465841	704687	547867
AAR33481.1;ADI82985.1;AJY69882.1;BBA68696.1;BEH08508.1;QVW35424.1;UAC04247.1;UTG92865.1	BEH08508.1;UTG92865.1;UAC04247.1;QVW35424.1;BBA68696.1;AJY69882.1;ADI82985.1;AAR33481.1	Twitching;twitching;type	0.407071	0.0877267	0.970495	0	0	1430000	1570000	1540000	2030000	2280000	1710000
AAR33484.1;ADI82988.1;AJY69885.1;QVW35427.1;UAC04250.1;UTG92868.1;WP_010940825.1	WP_010940825.1;UTG92868.1;UAC04250.1;QVW35427.1;AJY69885.1;ADI82988.1;AAR33484.1	HAMP;histidine;hybrid;motility	-0.167436	0.436231	0.970495	0	0	2800000	4070000	3990000	3160000	3310000	3200000
AAR33486.1;ADI82990.1;AJY69887.1;BBA68700.1;BEH08513.1;QVW35429.1;UAC04252.1;UTG92870.1;WP_010940827.1;WP_014551238.1;WP_119331466.1	BEH08513.1;UTG92870.1;UAC04252.1;QVW35429.1;WP_010940827.1;WP_014551238.1;WP_119331466.1;BBA68700.1;AJY69887.1;ADI82990.1;AAR33486.1	Acetylornithine;acetylornithine	0.13465	0.522407	0.970495	0	0	3960000	4220000	2860000	4380000	4280000	3460000
AAR33489.1;ADI82993.1;AJY69890.1;BBA68703.1;BEH08516.1;QVW35432.1;UAC04255.1;UTG92873.1;WP_010940830.1;WP_119331469.1;WP_286351186.1	WP_119331469.1;WP_286351186.1;WP_010940830.1;BEH08516.1;UTG92873.1;UAC04255.1;QVW35432.1;BBA68703.1;AJY69890.1;ADI82993.1;AAR33489.1	DNA;MULTISPECIES:;NUDIX;Nucleoside	0.329653	0.504284	0.970495	0	0	1050000	2060000	2850000	3390000	1860000	2240000
AAR33490.1;ADI82994.1;AJY69891.1;QVW35433.1;UAC04256.1;UTG92874.1;WP_010940831.1	WP_324309312.1;WP_286351187.1;BEH08517.1;UTG92874.1;UAC04256.1;QVW35433.1;WP_119331470.1;BBA68704.1;AJY69891.1;ADI82994.1;AAR33490.1;WP_010940831.1	hypothetical	0.0378341	0.955975	1	0	0	109933	403987	352835	401795	379092	108899
AAR33492.1;ADI82996.1;AJY69893.1;QVW35435.1;UAC04258.1;UTG92876.1	WP_286351189.1;WP_119331472.1;BEH08519.1;UTG92876.1;UAC04258.1;QVW35435.1;BBA68706.1;AJY69893.1;ADI82996.1;AAR33492.1	fibronectin;lipoprotein,	0.442593	0.354371	0.970495	0	0	388759	360242	579188	348734	769562	686772
AAR33493.1;ADI82997.1;AJY69894.1;BBA68707.1;QVW35436.1;UAC04259.1;UTG92877.1;WP_119331473.1	WP_286351190.1;BEH08520.1;UTG92877.1;UAC04259.1;QVW35436.1;WP_119331473.1;BBA68707.1;AJY69894.1;ADI82997.1;AAR33493.1	Diaminopimelate;diaminopimelate	-0.126429	0.547289	0.970495	0	0	7090000	5600000	4830000	5790000	5350000	4910000
AAR33499.1;ADI83002.1;AJY69899.1;BBA68713.1;BEH08525.1;QVW35443.1;UAC04264.1;UTG92882.1;WP_010940839.1	WP_010940839.1;BEH08525.1;UTG92882.1;UAC04264.1;QVW35443.1;BBA68713.1;AJY69899.1;ADI83002.1;AAR33499.1	MULTISPECIES:;MarR;hypothetical	-1.04864	0.304699	0.970495	0	0	1440000	535972	482842	355537	315791	517317
AAR33500.1;ADI83003.1;AJY69900.1;BBA68714.1;UAC04265.1;WP_010940840.1	WP_010940840.1;UAC04265.1;BBA68714.1;AJY69900.1;ADI83003.1;AAR33500.1	AAA;hypothetical	-0.333495	0.618639	0.970495	1	0	748134	683652	394426	274266	883200	291837
AAR33503.1;ADI83005.2;BBA68717.1;BEH08526.1;UAC04268.1;WP_010940843.1;WP_119331480.1;WP_324309316.1	WP_119331480.1;WP_010940843.1;WP_324309316.1;BEH08526.1;UAC04268.1;BBA68717.1;ADI83005.2;AAR33503.1	Adenosine;Fic;MULTISPECIES:	0.211539	0.659534	0.97248	0	0	129262	48589	156084	156642	128188	101841
AAR33504.1;ADI83006.1;AJY69905.1;QVW35447.1;UAC04269.1;UTG92885.1;WP_010940844.1;WP_214302882.1	WP_214302882.1;WP_010940844.1;WP_286351195.1;WP_119331481.1;BEH08527.1;UTG92885.1;UAC04269.1;QVW35447.1;BBA68718.1;AJY69905.1;ADI83006.1;AAR33504.1	ABC;ABC-F;ATP-binding;MULTISPECIES:	0.0280825	0.806666	0.990742	0	0	1390000	1300000	1380000	1570000	1290000	1290000
AAR33508.2;ADI83010.1;AJY69909.1;QVW35451.1;UAC04273.1;UTG92889.1;WP_010940848.1;WP_324309320.1	WP_324309320.1;WP_010940848.1;UTG92889.1;UAC04273.1;QVW35451.1;AJY69909.1;AAR33508.2;ADI83010.1	cupin	0.116719	0.46521	0.970495	0	0	1070000	950148	1180000	979812	1250000	1240000
AAR33509.1;ADI83011.1;BEH08532.1;CBA11097.1;CBF57639.1;CBF66808.1;CBF68666.1;CBU83140.1;CBU91681.1;CBU93540.1;QVW35452.1;UAC04274.1;UTG92890.1;WP_010940849.1	WP_324309321.1;WP_119331485.1;WP_010940849.1;BEH08532.1;UTG92890.1;UAC04274.1;QVW35452.1;BBA68724.1;AJY69910.1;ADI83011.1;AAR33509.1;CBU93540.1;CBU91681.1;CBU83140.1;CBF66808.1;CBF57639.1;CBF68666.1;CBA11097.1	MULTISPECIES:;acetyl-CoA;succinyl:acetate;unnamed	-0.0626156	0.745049	0.981924	0	0	6150000	4920000	4940000	6050000	4960000	4320000
AAR33512.1;ADI83014.1;BEH08535.1;UAC04277.1;WP_010940852.1;WP_286351200.1	WP_286351200.1;WP_214302884.1;WP_010940852.1;BEH08535.1;UAC04277.1;QVW35455.1;ADI83014.1;AAR33512.1	GNAT;N-acetyltransferase;acetyltransferase,	-0.0418047	0.839984	0.991407	0	0	1060000	1070000	1150000	866320	1000000	1320000
AAR33514.1;ADI83016.1;AJY69915.1;BBA68729.1;BEH08537.1;QVW35457.1;UAC04279.1;UTG92895.1;WP_010940854.1;WP_119331490.1	WP_010940854.1;BEH08537.1;WP_119331490.1;UTG92895.1;UAC04279.1;QVW35457.1;BBA68729.1;AJY69915.1;ADI83016.1;AAR33514.1	2-amino-4-deoxychorismate;FMN;MULTISPECIES:;flavodoxin;flavodoxin,	0.333258	0.204782	0.970495	1	0	244153	250664	352652	422672	325007	320009
AAR33517.1;ADI83019.1;AJY69918.1;BBA68732.1;BEH08540.1;QVW35460.1;UAC04282.1;UTG92898.1;WP_119331493.1;WP_286351203.1	WP_286351203.1;BEH08540.1;UTG92898.1;WP_119331493.1;UAC04282.1;QVW35460.1;BBA68732.1;AJY69918.1;ADI83019.1;AAR33517.1	Lpp/OprI;hypothetical;lipoprotein;lipoprotein,	1.30754	0.0174972	0.948398	0	0	125482	332063	277157	602461	566326	649742
AAR33518.1;ADI83020.1;AJY69919.1;BBA68733.1;QVW35461.1;UAC04283.1;UTG92899.1;WP_010940858.1;WP_119331494.1	WP_324309324.1;WP_286351204.1;WP_010940858.1;WP_119331494.1;BEH08541.1;UTG92899.1;UAC04283.1;QVW35461.1;BBA68733.1;AJY69919.1;ADI83020.1;AAR33518.1	L,D-transpeptidase;MULTISPECIES:;peptidase;peptidoglycan;putative	1.01491	0.0940702	0.970495	0	0	163144	583603	682935	659071	1170000	1060000
AAR33525.1;ADI83029.1;AJY69925.1;BBA68743.1;BEH08548.1;QVW35467.1;UAC04290.1;UTG92905.1;WP_010940866.1	WP_010940866.1;BEH08548.1;UTG92905.1;UAC04290.1;QVW35467.1;BBA68743.1;AJY69925.1;ADI83029.1;AAR33525.1	Cold;MULTISPECIES:;cold;cold-shock	0.406626	0.369744	0.970495	0	0	635293	223108	430136	660232	465813	582016
AAR33529.1;ADI83034.1;AJY69929.1;QVW35470.1;UAC04293.1;UTG92908.1	UTG92908.1;UAC04293.1;QVW35470.1;AJY69929.1;ADI83034.1;AAR33529.1	dodecin;flavin	-0.0432567	0.956894	1	0	0	1260000	735511	171345	1070000	461170	571681
AAR33530.1;ADI83035.1;AJY69930.1;BBA68746.1;BEH08552.1;QVW35471.1;UAC04294.1;UTG92909.1;WP_010940871.1;WP_119331505.1;WP_286351213.1;WP_324309332.1	WP_286351213.1;WP_119331505.1;WP_010940871.1;WP_324309332.1;BEH08552.1;UTG92909.1;UAC04294.1;QVW35471.1;BBA68746.1;AJY69930.1;ADI83035.1;AAR33530.1	MULTISPECIES:;PaaI;acyl-CoA;hypothetical;thioesterase	-0.549663	0.352223	0.970495	0	0	1890000	2590000	4200000	3030000	1530000	1370000
AAR33531.1;ADI83036.1;AJY69931.1;BBA68747.1;CBG15392.1;CBV28838.1;QVW35472.1;UAC04295.1;UTG92910.1;WP_119331506.1	UTG92910.1;UAC04295.1;QVW35472.1;WP_119331506.1;BBA68747.1;AJY69931.1;ADI83036.1;AAR33531.1;CBV28838.1;CBG15392.1	NADP-dependent;SDR;malonic;oxidoreductase,;unnamed	0.0322283	0.926478	1	0	0	1940000	1710000	2990000	2410000	2730000	1650000
AAR33536.2;UAC04299.1;WP_010940877.1	WP_010940877.1;UAC04299.1;AAR33536.2	XdhC;XdhC/CoxI;dehydrogenase	0.375119	0.593929	0.970495	0	0	359884	166719	201938	273004	155281	516594
AAR33541.1;ADI83046.1;AJY69940.1;BBA68758.1;BEH08563.1;CBF71958.1;CBU95460.1;QVW35481.1;UAC04304.1;UTG92920.1;WP_010940882.1	WP_010940882.1;BEH08563.1;UTG92920.1;UAC04304.1;QVW35481.1;BBA68758.1;AJY69940.1;ADI83046.1;AAR33541.1;CBU95460.1;CBF71958.1	Cold;MULTISPECIES:;cold;cold-shock;unnamed	-0.163302	0.652235	0.97248	0	0	11400000	12000000	5940000	8100000	7900000	10200000
AAR33542.1;BBA68759.1;BEH08564.1;UAC04305.1;WP_010940883.1;WP_232008944.1	BEH08564.1;WP_232008944.1;UAC04305.1;WP_010940883.1;BBA68759.1;AAR33542.1	DUF4350;hypothetical	0.131036	0.586337	0.970495	1	1	218523	279233	336661	259818	295550	358386
AAR33544.2;UAC04306.1;WP_010940885.1	WP_286351225.1;WP_119331515.1;WP_014551255.1;WP_010940885.1;BEH08565.1;UTG92922.1;UAC04306.1;QVW35483.1;BBA68760.1;AJY69943.1;AAR33544.2;ADI83048.1	ABC	-0.249395	0.20099	0.970495	0	0	6970000	8890000	6880000	7020000	5940000	6170000
AAR33545.1;BBA68761.1;BEH08566.1;UAC04307.1;WP_010940886.1;WP_119331516.1;WP_286351226.1	WP_119331516.1;WP_010940886.1;WP_286351226.1;BEH08566.1;UAC04307.1;BBA68761.1;AAR33545.1	ABC;MULTISPECIES:;hypothetical	0.624773	0.250077	0.970495	0	0	409867	495062	1130000	787796	1210000	1140000
AAR33546.1;BBA68762.1;BEH08567.1;UAC04308.1;WP_010940887.1;WP_286351227.1	WP_286351227.1;WP_010940887.1;BEH08567.1;UAC04308.1;BBA68762.1;AAR33546.1	ABC;ATP-binding;Choline	0.00242428	0.99161	1	0	0	714856	1170000	932962	893274	990657	938626
AAR33548.1;ADI83052.1;AJY69947.1;BBA68764.1;QVW35487.1;UAC04310.1;UTG92926.1;WP_010940889.1;WP_014551259.1;WP_119331518.1;WP_254278267.1	WP_254278267.1;WP_119331518.1;WP_014551259.1;WP_010940889.1;BEH08569.1;UTG92926.1;UAC04310.1;QVW35487.1;BBA68764.1;AJY69947.1;ADI83052.1;AAR33548.1	ATP-binding;ATPase;hypothetical	0.504227	0.073427	0.970495	0	0	98342	152747	155441	203750	167365	205492
AAR33551.1;ADI83055.1;AJY69950.1;BBA68767.1;BEH08572.1;QVW35490.1;UAC04313.1;UTG92929.1;WP_010940892.1;WP_014551260.1;WP_119331519.1;WP_286351230.1	WP_010940892.1;WP_119331519.1;WP_014551260.1;WP_286351230.1;BEH08572.1;UTG92929.1;UAC04313.1;QVW35490.1;BBA68767.1;AJY69950.1;ADI83055.1;AAR33551.1	5,6-dimethylbenzimidazole;MULTISPECIES:;nitroreductase;nitroreductase-like	-0.286118	0.334999	0.970495	0	0	8250000	10400000	9700000	6280000	6570000	10400000
AAR33552.1;ADI83056.1;AJY69951.1;BBA68768.1;BEH08573.1;QVW35491.1;UAC04314.1;UTG92930.1;WP_010940893.1;WP_014551261.1;WP_119331520.1;WP_286351231.1	WP_286351231.1;WP_119331520.1;WP_014551261.1;BEH08573.1;WP_010940893.1;UTG92930.1;UAC04314.1;QVW35491.1;BBA68768.1;AJY69951.1;ADI83056.1;AAR33552.1	MULTISPECIES:;SCO;cytochrome;hypothetical	0.0804495	0.821249	0.991407	0	0	557649	435793	794572	456802	651182	782568
AAR33558.1;ADI83062.1;AJY69957.1;BBA68774.1;BEH08579.1;QVW35497.1;UAC04320.1;UTG92936.1	BEH08579.1;UTG92936.1;UAC04320.1;QVW35497.1;BBA68774.1;AJY69957.1;ADI83062.1;AAR33558.1	cupin;hypothetical	-0.291763	0.57523	0.970495	0	0	1530000	557504	1380000	700930	1210000	921685
AAR33561.1;ADI83065.1;AJY69960.1;BBA68776.1;BEH08582.1;QVW35500.1;UAC04323.1;UTG92939.1;WP_010940902.1;WP_014551269.1;WP_119331526.1;WP_286351237.1;WP_324309347.1	WP_014551269.1;WP_010940902.1;WP_324309347.1;WP_286351237.1;WP_119331526.1;BEH08582.1;UTG92939.1;UAC04323.1;QVW35500.1;BBA68776.1;AJY69960.1;ADI83065.1;AAR33561.1	DNA;MULTISPECIES:;Modification	0.288449	0.391823	0.970495	0	0	491411	414817	788388	692967	763387	613325
AAR33562.1;ADI83066.1;AJY69961.1;BEH08583.1;QVW35501.1;UAC04324.1;UTG92940.1;WP_010940903.1;WP_014551270.1	WP_119331527.1;WP_014551270.1;WP_010940903.1;BEH08583.1;UTG92940.1;UAC04324.1;QVW35501.1;BBA68777.1;AJY69961.1;ADI83066.1;AAR33562.1	FKBP-type;MULTISPECIES:;peptidylprolyl	0.0962153	0.722149	0.975021	0	0	15000000	16500000	20700000	16000000	23800000	16000000
AAR33565.1;ADI83069.1;AJY69964.1;QVW35504.1;UAC04327.1;UTG92943.1;WP_010940906.1;WP_254278268.1	WP_324309349.1;BEH08586.1;WP_254278268.1;UTG92943.1;UAC04327.1;QVW35504.1;WP_010940906.1;WP_119331530.1;BBA68780.1;AJY69964.1;ADI83069.1;AAR33565.1	DUF4388;hypothetical;response	-0.744343	0.138837	0.970495	0	1	456772	627064	424783	451895	150655	298005
AAR33569.1;ADI83072.1;AJY69967.1;QVW35507.1;UAC04330.1;WP_010940909.1;WP_014551272.1	WP_324309351.1;BEH08589.1;WP_254278269.1;WP_119331534.1;WP_014551272.1;WP_010940909.1;UTG92946.1;UAC04330.1;QVW35507.1;BBA68783.1;AJY69967.1;ADI83072.1;AAR33569.1	RNA-binding;S1;Tex;transcription	-0.654682	0.129814	0.970495	0	0	1360000	1720000	988737	689665	1100000	794860
AAR33571.1;ADI83074.1;QVW35509.1;UAC04332.1;UTG92948.1;WP_010940911.1	WP_010940911.1;UTG92948.1;UAC04332.1;QVW35509.1;AJY69969.1;ADI83074.1;AAR33571.1	MaoC;dehydratase,	0.966439	0.169071	0.970495	0	0	660038	1070000	700858	1250000	1160000	2340000
AAR33572.1;ADI83075.1;QVW35510.1;UAC04333.1;UTG92949.1;WP_010940912.1;WP_254278270.1	WP_324309353.1;WP_010940912.1;BEH08592.1;WP_254278270.1;WP_119331537.1;UTG92949.1;UAC04333.1;QVW35510.1;BBA68786.1;AJY69970.1;ADI83075.1;AAR33572.1	B12-binding;lipid;radical	1.24401	0.103366	0.970495	0	0	174139	521293	551166	751588	1420000	781049
AAR33575.1;ADI83078.1;AJY69973.1;BBA68789.1;BEH08595.1;QVW35513.1;UAC04336.1;UTG92952.1;WP_010940915.1;WP_119331540.1;WP_286351248.1	WP_286351248.1;WP_010940915.1;WP_119331540.1;BEH08595.1;UTG92952.1;UAC04336.1;QVW35513.1;BBA68789.1;AJY69973.1;ADI83078.1;AAR33575.1	B12-binding;Hopanoid;MULTISPECIES:;radical	0.32346	0.430489	0.970495	0	0	973521	565347	1410000	1280000	1010000	1400000
AAR33576.1;ADI83079.1;BBA68790.1;BEH08596.1;QVW35514.1;UAC04337.1;UTG92953.1	BEH08596.1;UTG92953.1;UAC04337.1;QVW35514.1;BBA68790.1;AJY69974.1;ADI83079.1;AAR33576.1	Acyl;acyl;phosphopantetheine-binding	0.460921	0.219654	0.970495	0	0	2050000	2400000	2590000	2720000	4250000	2720000
AAR33578.1;ADI83081.1;AJY69976.1;BBA68792.1;QVW35516.1;UAC04339.1;UTG92955.1;WP_010940918.1;WP_119331542.1	WP_286351250.1;WP_119331542.1;WP_010940918.1;BEH08598.1;UTG92955.1;UAC04339.1;QVW35516.1;BBA68792.1;AJY69976.1;ADI83081.1;AAR33578.1	hypothetical;radical	0.0337356	0.925734	1	0	0	1770000	1610000	2960000	2430000	2410000	1650000
AAR33579.1;ADI83082.1;AJY69977.1;QVW35517.1;UAC04340.1;UTG92956.1;WP_010940919.1	WP_010940919.1;WP_286351251.1;WP_324309355.1;BEH08599.1;WP_119331543.1;UTG92956.1;UAC04340.1;QVW35517.1;BBA68793.1;AJY69977.1;ADI83082.1;AAR33579.1	glycosyl;glycosyltransferase;undecaprenyl-phosphate	0.273529	0.33758	0.970495	0	0	636971	441569	651381	587709	635748	867604
AAR33580.1;ADI83083.1;AJY69978.1;QVW35518.1;UAC04341.1;UTG92957.1;WP_010940920.1;WP_014551273.1	WP_014551273.1;WP_010940920.1;UTG92957.1;UAC04341.1;QVW35518.1;WP_119331544.1;BBA68794.1;AJY69978.1;ADI83083.1;AAR33580.1	polysaccharide	0.0561221	0.940512	1	0	0	674574	1110000	377098	723695	263725	1260000
AAR33584.1;ADI83087.1;AJY71916.1;BBA68798.1;BEH08604.1;QVW35522.1;UAC04345.1;UTG92961.1;WP_010940924.1;WP_119334015.1	BEH08604.1;UTG92961.1;UAC04345.1;QVW35522.1;WP_119334015.1;BBA68798.1;WP_010940924.1;AJY71916.1;ADI83087.1;AAR33584.1	DUF2721;hypothetical;protein	-1.17535	0.202063	0.970495	0	0	100364	282113	149846	108034	93194	34472
AAR33587.1;AJY69982.1;UAC04347.1;WP_010940927.1	WP_350284113.1;BEH08605.1;UAC04347.1;WP_010940927.1;AJY69982.1;AAR33587.1	PAS;histidine;sensor	0.0187732	0.982561	1	0	0	622037	619797	2140000	602345	953783	1870000
AAR33590.1;ADI83091.1;AJY69985.1;BBA68802.1;QVW35526.1;UAC04349.1;UTG92965.1;WP_010940930.1;WP_119331550.1	UTG92965.1;UAC04349.1;QVW35526.1;WP_119331550.1;WP_010940930.1;BBA68802.1;AJY69985.1;ADI83091.1;AAR33590.1	Bacteriohemerythrin;hemerythrin	0.517971	0.344226	0.970495	0	0	625308	151890	682238	561679	693226	834920
AAR33593.1;ADI83094.1;QVW35529.1;UAC04352.1;UTG92968.1;WP_010940933.1	WP_286351261.1;BEH08610.1;WP_119331553.1;WP_010940933.1;UTG92968.1;UAC04352.1;QVW35529.1;BBA68805.1;AJY69988.1;ADI83094.1;AAR33593.1	flavin;flavoredoxin	0.0681866	0.662769	0.97248	0	0	11500000	8710000	9130000	10500000	9360000	10900000
AAR33594.1;ADI83095.2;QVW35530.1;UAC04353.1;UTG92969.1;WP_010940934.1	WP_010940934.1;UTG92969.1;UAC04353.1;QVW35530.1;ADI83095.2;AAR33594.1	universal	-0.500306	0.618994	0.970495	0	0	2220000	414813	728919	577866	1050000	750148
AAR33595.1;ADI83096.1;AJY69990.1;QVW35531.1;UAC04354.1;UTG92970.1;WP_010940935.1;WP_014551280.1	WP_014551280.1;WP_010940935.1;UTG92970.1;UAC04354.1;QVW35531.1;AJY69990.1;ADI83096.1;AAR33595.1	cation:proton;monovalent;sodium:proton	-1.26233	0.326564	0.970495	0	1	1530000	569750	329614	295555	327869	389307
AAR33601.1;ADI83102.1;AJY69995.1;BBA68815.1;BEH08617.1;CBF63339.1;CBU88215.1;QVW35536.1;UAC04359.1;UTG92975.1;WP_010940940.1;WP_119331562.1;WP_235044943.1;WP_286351268.1;WP_324309366.1	WP_010940940.1;WP_286351268.1;WP_324309366.1;BEH08617.1;WP_235044943.1;WP_119331562.1;UTG92975.1;UAC04359.1;QVW35536.1;BBA68815.1;AJY69995.1;ADI83102.1;AAR33601.1;CBU88215.1;CBF63339.1	GntR;HTH-type;MULTISPECIES:;helix-turn-helix;unnamed	-0.19516	0.799476	0.990681	1	0	677280	424210	200283	640238	127967	368863
AAR33607.2;ADI83108.1;AJY70001.1;UAC04365.1;UTG92981.1;WP_010940946.1;WP_045667893.1	WP_045667893.1;WP_010940946.1;WP_214302893.1;WP_119331567.1;UTG92981.1;UAC04365.1;QVW35542.1;BBA68821.1;AJY70001.1;AAR33607.2;ADI83108.1	B12-binding;radical	0.0927096	0.760549	0.985743	0	0	809082	952707	798030	655234	874483	1200000
AAR33608.1;ADI83109.1;AJY70002.1;BBA68822.1;QVW35543.1;UAC04366.1;UTG92982.1;WP_010940947.1;WP_014551284.1	WP_286351274.1;WP_014551284.1;WP_010940947.1;BEH08624.1;UTG92982.1;UAC04366.1;QVW35543.1;BBA68822.1;AJY70002.1;ADI83109.1;AAR33608.1	C-type;cytochrome	0.0396707	0.758348	0.985743	0	0	10600000	9550000	9980000	11700000	10200000	9070000
AAR33616.1;ADI83116.1;AJY70010.1;BBA68829.1;QVW35550.1;UAC04372.1;UTG92989.1;WP_010940955.1;WP_119331573.1	WP_010940955.1;WP_119331573.1;UTG92989.1;UAC04372.1;QVW35550.1;BBA68829.1;AJY70010.1;ADI83116.1;AAR33616.1	ATP-binding;GAF;Sensor;histidine;sensor	0.0816534	0.790733	0.988936	0	0	542916	505333	887535	614755	717071	716679
AAR33617.1;ADI83117.1;AJY70011.1;BBA68830.1;BEH08626.1;QVW35551.1;UAC04373.1;UTG92990.1;WP_010940956.1;WP_324309373.1	WP_324309373.1;WP_010940956.1;BEH08626.1;UTG92990.1;UAC04373.1;QVW35551.1;BBA68830.1;AJY70011.1;ADI83117.1;AAR33617.1	RNA;conjugal;zinc	-0.0692307	0.912313	0.999308	0	0	414236	288775	919885	389889	484166	672802
AAR33618.1;ADI83118.1;AJY70012.1;QVW35552.1;UAC04374.1;UTG92991.1;WP_010940957.1	WP_119331574.1;WP_010940957.1;BEH08627.1;UTG92991.1;UAC04374.1;QVW35552.1;BBA68831.1;AJY70012.1;ADI83118.1;AAR33618.1	DNA	0.229961	0.310335	0.970495	0	0	794212	539774	838158	837044	798337	912117
AAR33619.1;ADI83119.1;AJY70013.1;QVW35553.1;UAC04375.1;UTG92992.1;WP_010940958.1;WP_014551287.1	WP_014551287.1;WP_010940958.1;UTG92992.1;UAC04375.1;QVW35553.1;AJY70013.1;ADI83119.1;AAR33619.1	HEAT;HEAT-like;PBS	-0.0701042	0.806298	0.990742	0	0	2130000	1180000	1750000	1420000	1770000	1630000
AAR33620.1;ADI83120.1;AJY70014.1;BBA68833.1;QVW35554.1;UAC04376.1;UTG92993.1;WP_010940959.1;WP_119331576.1	WP_119331576.1;WP_010940959.1;UTG92993.1;UAC04376.1;QVW35554.1;BBA68833.1;AJY70014.1;ADI83120.1;AAR33620.1	Cyclic;HD;HD-GYP;cyclic;diguanylate	0.00467649	0.988826	1	0	0	2120000	1950000	2090000	1630000	2900000	1650000
AAR33621.2;ADI83121.2;AJY70015.1;BBA68834.1;QVW35555.1;UAC04377.1;UTG92994.1;WP_010940960.1;WP_119331577.1	WP_010940960.1;WP_119331577.1;UTG92994.1;UAC04377.1;QVW35555.1;BBA68834.1;AJY70015.1;AAR33621.2;ADI83121.2	HEAT;HEAT-like;PBS;hypothetical	-0.0763318	0.765364	0.985743	0	0	746434	626201	1030000	804646	751312	722860
AAR33622.1;ADI83122.1;AJY70016.1;BBA68835.1;BEH08631.1;QVW35556.1;UAC04378.1;UTG92995.1;WP_010940961.1;WP_119331578.1	BEH08631.1;UTG92995.1;UAC04378.1;QVW35556.1;WP_119331578.1;BBA68835.1;AJY70016.1;ADI83122.1;AAR33622.1;WP_010940961.1	hypothetical	-1.73838	0.240928	0.970495	0	0	1480000	5480000	1940000	1090000	953065	624320
AAR33623.1;ADI83123.1;AJY70018.1;QVW35557.1;UAC04379.1;UTG92996.1;WP_010940962.1	BEH08632.1;WP_119331579.1;WP_010940962.1;UTG92996.1;UAC04379.1;QVW35557.1;BBA68836.1;AJY70018.1;ADI83123.1;AAR33623.1	3-oxoacyl-(acyl;3-oxoacyl-ACP;beta-ketoacyl-ACP;ketoacyl-ACP	-0.322824	0.114674	0.970495	0	0	5880000	5530000	4700000	4700000	4690000	3490000
AAR33636.1;ADI83135.1;AJY70028.1;QVW35566.1;UAC04388.1;UTG93005.1;WP_010940972.1	WP_010940972.1;UTG93005.1;UAC04388.1;QVW35566.1;AJY70028.1;ADI83135.1;AAR33636.1	DUF3365;Tll0287-like;histidine;sensor	0.370147	0.132964	0.970495	0	0	724652	670939	963004	1180000	916043	952405
AAR33637.1;ADI83136.1;AJY70029.1;QVW35567.1;UAC04389.1;UTG93006.1;WP_010940973.1	WP_119331589.1;WP_010940973.1;UTG93006.1;UAC04389.1;QVW35567.1;BBA68848.1;AJY70029.1;ADI83136.1;AAR33637.1	aminopeptidase	0.374394	0.0799342	0.970495	0	0	418200	591769	553331	710593	694616	621289
AAR33638.1;ADI83137.1;AJY70030.1;QVW36885.1;UAC05754.1;UTG94384.1;WP_010940974.1	WP_324309738.1;WP_119331591.1;WP_010940974.1;BEH08645.1;UTG94384.1;UAC05754.1;QVW36885.1;BBA68849.1;AJY70030.1;ADI83137.1;AAR33638.1	hydrogenase	-0.0383888	0.903658	0.9965	0	0	13400000	20700000	11600000	17000000	14400000	13100000
AAR33639.1;ADI83138.1;AJY70031.1;QVW35568.1;UAC04390.1;UTG93007.1;WP_010940975.1	WP_324309384.1;WP_119331592.1;WP_010940975.1;BEH08646.1;UTG93007.1;UAC04390.1;QVW35568.1;BBA68850.1;AJY70031.1;ADI83138.1;AAR33639.1	HAD;carbamoyltransferase;hydrogenase	0.400723	0.325869	0.970495	0	0	2800000	2130000	2160000	1960000	3830000	3570000
AAR33640.1;ADI83139.1;AJY70032.1;BBA68851.1;BEH08647.1;QVW35569.1;UAC04391.1;UTG93008.1;WP_286351293.1	WP_286351293.1;BEH08647.1;UTG93008.1;UAC04391.1;QVW35569.1;BBA68851.1;AJY70032.1;ADI83139.1;AAR33640.1	Hydrogenase;HypC/HybG/HupF;MULTISPECIES:;hydrogenase	1.11765	0.217573	0.970495	0	0	1510000	843158	1670000	4430000	2980000	1320000
AAR33641.1;ADI83140.1;AJY70033.1;CBG14408.1;CBV27922.1;QVW35570.1;UAC04392.1;UTG93009.1;WP_010940977.1	WP_324309385.1;WP_286351294.1;BEH08648.1;UTG93009.1;WP_119331593.1;WP_010940977.1;UAC04392.1;QVW35570.1;BBA68852.1;AJY70033.1;ADI83140.1;AAR33641.1;CBV27922.1;CBG14408.1	hydrogenase;unnamed	0.240307	0.287985	0.970495	0	0	4040000	2880000	4170000	4660000	3650000	4790000
AAR33642.1;ADI83141.1;AJY70034.1;QVW35571.1;UAC04393.1;UTG93010.1;WP_010940978.1	BEH08649.1;UTG93010.1;UAC04393.1;QVW35571.1;WP_119331594.1;WP_010940978.1;BBA68853.1;AJY70034.1;ADI83141.1;AAR33642.1	hydrogenase	0.0921422	0.891642	0.995781	0	0	418627	1500000	554376	730861	785241	1120000
AAR33643.1;ADI83142.2;AJY70035.1;QVW35572.1;UAC04394.1;UTG93011.1;WP_010940979.1	BEH08650.1;UTG93011.1;UAC04394.1;QVW35572.1;WP_119331595.1;WP_010940979.1;BBA68854.1;AJY70035.1;ADI83142.2;AAR33643.1	patatin-like;phospholipase;phospholipase,	0.00824399	0.974831	1	0	0	1990000	2500000	2490000	2960000	1750000	2310000
AAR33645.2;ADI83143.1;AJY70036.1;BBA68855.1;BEH08651.1;QVW35573.1;UAC04395.1;UTG93012.1;WP_010940980.1	WP_010940980.1;BEH08651.1;UTG93012.1;UAC04395.1;QVW35573.1;BBA68855.1;AJY70036.1;AAR33645.2;ADI83143.1	MULTISPECIES:;PilZ;hypothetical;pilus	0.133646	0.566673	0.970495	0	0	834276	662580	1050000	1060000	873694	860366
AAR33650.1;ADI83148.1;AJY70041.1;QVW35577.1;UAC04400.1;UTG93016.1;WP_010940985.1	BEH08656.1;UTG93016.1;UAC04400.1;QVW35577.1;WP_119331600.1;BBA68860.1;AJY70041.1;ADI83148.1;AAR33650.1;WP_010940985.1	DNA-binding;hypothetical	-0.116755	0.56642	0.970495	0	0	7130000	8140000	5440000	6480000	6230000	6390000
AAR33652.1;ADI83150.1;AJY70043.1;QVW35579.1;UAC04402.1;UTG93018.1;WP_010940987.1	WP_324309388.1;BEH08658.1;UTG93018.1;UAC04402.1;QVW35579.1;WP_010940987.1;WP_119331601.1;BBA68862.1;AJY70043.1;ADI83150.1;AAR33652.1	lipoprotein;type	0.00566875	0.982585	1	0	0	1530000	1450000	2100000	1460000	1540000	2100000
AAR33653.1;ADI83151.2;AJY70044.1;BEH08659.1;QVW35580.1;UAC04403.1;UTG93019.1;WP_010940988.1	BEH08659.1;UTG93019.1;UAC04403.1;QVW35580.1;WP_119331602.1;BBA68863.1;AJY70044.1;ADI83151.2;AAR33653.1;WP_010940988.1	general;type	0.534463	0.196242	0.970495	0	0	321991	498399	745027	811533	856418	599404
AAR33654.1;ADI83152.1;AJY70045.1;BEH08660.1;QVW35581.1;UAC04404.1;UTG93020.1;WP_010940989.1;WP_254278284.1;WP_324309389.1	WP_324309389.1;WP_254278284.1;WP_010940989.1;BEH08660.1;UTG93020.1;UAC04404.1;QVW35581.1;AJY70045.1;ADI83152.1;AAR33654.1	general;type	-0.0394203	0.873743	0.995781	0	0	1030000	1100000	1580000	1250000	1040000	1320000
AAR33655.1;ADI83153.1;AJY70046.1;QVW35582.1;UAC04405.1;UTG93021.1;WP_010940990.1	BEH08661.1;WP_010940990.1;UTG93021.1;UAC04405.1;QVW35582.1;AJY70046.1;ADI83153.1;AAR33655.1	general;type	0.596555	0.385026	0.970495	0	0	425345	392861	1470000	1270000	1010000	1180000
AAR33658.1;UAC04408.1;UTG93024.1;WP_010940993.1	WP_286351307.1;WP_014551291.1;WP_010940993.1;WP_119331606.1;BEH08664.1;UTG93024.1;UAC04408.1;QVW35585.1;BBA68868.1;ADI83156.2;AAR33658.1	prepilin-type;type	-0.240932	0.509812	0.970495	0	0	510166	904889	761780	453309	584698	804027
AAR33659.1;ADI83157.1;AJY70050.1;QVW35586.1;UAC04409.1;UTG93025.1;WP_010940994.1	BEH08665.1;UTG93025.1;UAC04409.1;QVW35586.1;WP_119331607.1;WP_010940994.1;BBA68869.1;AJY70050.1;ADI83157.1;AAR33659.1	general;type	0.0926662	0.651735	0.97248	0	0	1220000	1200000	1650000	1650000	1420000	1270000
AAR33660.1;BBA68870.1;BEH08666.1;UAC04410.1;UTG93026.1;WP_010940995.1;WP_119331608.1;WP_324309392.1	WP_324309392.1;BEH08666.1;UTG93026.1;UAC04410.1;QVW35587.1;WP_119331608.1;WP_014551292.1;WP_010940995.1;BBA68870.1;AJY70051.1;ADI83158.1;AAR33660.1	Type;type	0.250603	0.468393	0.970495	0	0	938102	1330000	1590000	1130000	1510000	1950000
AAR33661.1;ADI83159.1;BBA68871.1;BEH08667.1;QVW35588.1;UAC04411.1;UTG93027.1;WP_010940996.1;WP_041913993.1;WP_119331609.1	WP_416373114.1;WP_119331609.1;WP_324309393.1;WP_041913993.1;WP_010940996.1;BEH08667.1;UTG93027.1;UAC04411.1;QVW35588.1;BBA68871.1;AJY70052.1;ADI83159.1;AAR33661.1	Type;type	0.0740006	0.737128	0.981288	0	0	4480000	4380000	6340000	4650000	5790000	5560000
AAR33662.1;UAC04412.1;UTG93028.1;WP_010940997.1	WP_324309394.1;WP_119334019.1;WP_014551293.1;WP_010940997.1;BEH08668.1;UTG93028.1;UAC04412.1;QVW35589.1;BBA68872.1;ADI83160.2;AAR33662.1	type	-0.183397	0.200483	0.970495	0	0	5900000	6570000	7300000	5740000	5310000	6360000
AAR33663.1;ADI83161.1;AJY70055.1;BEH08669.1;QVW35590.1;UAC04413.1;UTG93029.1;WP_010940998.1	BEH08669.1;WP_010940998.1;UTG93029.1;UAC04413.1;QVW35590.1;AJY70055.1;ADI83161.1;AAR33663.1	PDZ;general;type	-0.266317	0.127255	0.970495	0	0	3360000	3960000	3240000	3310000	2900000	2570000
AAR33664.1;ADI83162.2;AJY70056.1;CBF75021.1;CBF79875.1;CBF82566.1;CBF92421.1;CBF93958.1;CBF97478.1;CBG03474.1;CBG04275.1;CBG05140.1;CBG10940.1;CBG11617.1;CBU96928.1;CBU99232.1;CBV00438.1;CBV05941.1;CBV07478.1;CBV10998.1;CBV16994.1;CBV17797.1;CBV18662.1;CBV24462.1;CBV25131.1;QVW35591.1;UAC04414.1;UTG93030.1;WP_010940999.1	UTG93030.1;UAC04414.1;QVW35591.1;WP_010940999.1;AJY70056.1;ADI83162.2;AAR33664.1;CBV25131.1;CBV24462.1;CBV07478.1;CBV00438.1;CBU96928.1;CBV18662.1;CBV17797.1;CBV16994.1;CBV10998.1;CBV05941.1;CBU99232.1;CBG05140.1;CBF97478.1;CBG04275.1;CBG11617.1;CBG10940.1;CBG03474.1;CBF93958.1;CBF92421.1;CBF75021.1;CBF82566.1;CBF79875.1	DegQ;peptidase;periplasmic;unnamed	-0.103124	0.356978	0.970495	0	0	63100000	52700000	59600000	57200000	56300000	49800000
AAR33675.1;ADI83173.1;AJY70067.1;BBA68884.1;BEH08681.1;QVW35602.1;UAC04425.1;UTG93041.1;WP_010941010.1	WP_010941010.1;BEH08681.1;UTG93041.1;UAC04425.1;QVW35602.1;BBA68884.1;AJY70067.1;ADI83173.1;AAR33675.1	MULTISPECIES:;NAD(P)H-dependent;NADH;NADP-reducing	0.11005	0.459245	0.970495	0	0	7850000	7860000	9900000	8760000	10100000	8780000
AAR33676.1;ADI83174.1;AJY70068.1;QVW35603.1;UAC04426.1;UTG93042.1;WP_010941011.1	BEH08682.1;UTG93042.1;UAC04426.1;QVW35603.1;WP_010941011.1;WP_119331618.1;BBA68885.1;AJY70068.1;ADI83174.1;AAR33676.1	NADH;NADH-quinone	0.0583522	0.335424	0.970495	0	0	18400000	16600000	18300000	18300000	18500000	18700000
AAR33677.1;ADI83175.1;AJY70069.1;QVW35604.1;UAC04427.1;UTG93043.1;WP_010941012.1	WP_286351322.1;WP_119331619.1;WP_010941012.1;WP_324309397.1;BEH08683.1;UTG93043.1;UAC04427.1;QVW35604.1;BBA68886.1;AJY70069.1;ADI83175.1;AAR33677.1	NADH;molybdopterin-dependent	-0.0614732	0.740609	0.981652	0	0	29700000	29900000	26700000	33400000	26300000	23000000
AAR33680.1;ADI83178.1;AJY70072.1;BBA68889.1;QVW35607.1;UAC04430.1;UTG93046.1;WP_010941015.1;WP_119331620.1	WP_119331620.1;WP_010941015.1;UTG93046.1;UAC04430.1;QVW35607.1;BBA68889.1;AJY70072.1;ADI83178.1;AAR33680.1	NADH;NADH-quinone	-0.907061	0.30063	0.970495	0	0	1640000	620060	678613	333019	771150	462938
AAR33682.1;ADI83180.1;AJY70074.1;BBA68891.1;BEH08688.1;QVW35609.1;UAC04432.1;UTG93048.1;WP_010941017.1;WP_119331621.1	BEH08688.1;UTG93048.1;UAC04432.1;QVW35609.1;WP_119331621.1;WP_010941017.1;BBA68891.1;AJY70074.1;ADI83180.1;AAR33682.1	NADH;NADH-quinone	-0.0534088	0.935123	1	0	0	3030000	1390000	778947	2020000	1510000	1480000
AAR33683.1;ADI83181.1;AJY70075.1;QVW35610.1;UAC04433.1;UTG93049.1;WP_010941018.1	WP_324309399.1;BEH08689.1;WP_119331622.1;WP_010941018.1;UTG93049.1;UAC04433.1;QVW35610.1;BBA68892.1;AJY70075.1;ADI83181.1;AAR33683.1	NADH;NADH-quinone	0.0322604	0.571252	0.970495	0	0	25200000	26900000	27500000	27500000	28100000	25800000
AAR33684.1;ADI83182.1;AJY70076.1;QVW35611.1;UAC04434.1;UTG93050.1;WP_010941019.1	WP_010941019.1;UTG93050.1;UAC04434.1;QVW35611.1;AJY70076.1;ADI83182.1;AAR33684.1	NADH;NADH-quinone	-0.100497	0.75283	0.983129	0	0	949444	796823	1340000	761105	927492	1190000
AAR33685.1;ADI83183.1;AJY70077.1;QVW35612.1;UAC04435.1;WP_010941020.1	WP_254278285.1;UTG93051.1;UAC04435.1;QVW35612.1;WP_010941020.1;AJY70077.1;ADI83183.1;AAR33685.1	peroxiredoxin,;thiol;thioredoxin	-0.250172	0.305579	0.970495	0	0	25500000	32600000	22300000	19100000	24000000	24500000
AAR33688.1;ADI83186.1;AJY70080.1;QVW35615.1;UAC04438.1;UTG93054.1;WP_010941023.1	BEH08695.1;UTG93054.1;UAC04438.1;QVW35615.1;WP_119331627.1;BBA68897.1;AJY70080.1;ADI83186.1;AAR33688.1;WP_010941023.1	hypothetical	0.164628	0.797238	0.990681	0	0	1700000	1920000	988730	825821	1490000	2850000
AAR33689.1;ADI83188.1;BEH08697.1;UAC04440.1;WP_010941025.1	WP_119331629.1;WP_010941025.1;WP_254278288.1;BEH08697.1;UTG93056.1;UAC04440.1;BBA68899.1;AJY70082.1;ADI83188.1;AAR33689.1	MULTISPECIES:;ammonia-forming;cytochrome	-0.525479	0.084791	0.970495	0	0	5120000	3720000	3870000	2950000	2630000	3250000
AAR33691.1;BBA68901.1;BEH08699.1;UAC04442.1;WP_010941027.1;WP_119331631.1	WP_119331631.1;WP_010941027.1;BEH08699.1;UAC04442.1;BBA68901.1;AAR33691.1	MULTISPECIES:;Transcriptional;sigma-54;sigma-54-dependent	-0.0975427	0.658427	0.97248	0	0	689206	659692	800622	831472	540988	636532
AAR33692.1;UAC04443.1;WP_010941028.1	BEH08700.1;UTG93059.1;WP_119331632.1;WP_014551297.1;WP_010941028.1;UAC04443.1;QVW35619.1;BBA68902.1;ADI83191.1;AAR33692.1	OmpA;outer;peptidoglycan-binding	-0.25112	0.345932	0.970495	0	0	32200000	29300000	20500000	24300000	24800000	19800000
AAR33693.1;ADI83192.2;AJY70086.1;QVW35620.1;UAC04444.1;UTG93060.1;WP_010941029.1	WP_010941029.1;WP_286351335.1;BEH08701.1;UTG93060.1;UAC04444.1;QVW35620.1;AJY70086.1;ADI83192.2;AAR33693.1	peptidylprolyl	0.241285	0.126012	0.970495	0	0	13200000	12600000	14300000	15200000	14400000	17800000
AAR33694.1;ADI83193.1;AJY70087.1;BBA68904.1;QVW35621.1;UAC04445.1;UTG93061.1;WP_010941030.1;WP_119331634.1	UTG93061.1;UAC04445.1;QVW35621.1;WP_119331634.1;BBA68904.1;AJY70087.1;ADI83193.1;AAR33694.1;WP_010941030.1	hypothetical	0.026967	0.930936	1	0	0	2120000	1570000	1610000	1720000	2370000	1310000
AAR33695.1;ADI83194.2;AJY70088.1;QVW35622.1;UAC04446.1;UTG93062.1;WP_010941031.1	UTG93062.1;UAC04446.1;QVW35622.1;AJY70088.1;WP_010941031.1;ADI83194.2;AAR33695.1	ATP-dependent;helicase	-0.0917793	0.862272	0.99447	0	0	206666	528154	257274	331464	239097	360385
AAR33698.1;ADI83197.1;AJY70091.1;QVW35625.1;UAC04449.1;UTG93065.1;WP_010941034.1	WP_010941034.1;WP_119331637.1;UTG93065.1;UAC04449.1;QVW35625.1;BBA68908.1;AJY70091.1;ADI83197.1;AAR33698.1	helix-turn-helix;transcriptional	-0.505501	0.349442	0.970495	0	0	775679	325460	804432	511407	384206	446701
AAR33700.1;ADI83199.1;AJY70093.1;BEH08708.1;QVW35627.1;UAC04451.1;UTG93067.1;WP_010941036.1;WP_286351342.1;WP_324309741.1	WP_324309741.1;WP_286351342.1;WP_010941036.1;BEH08708.1;UTG93067.1;UAC04451.1;QVW35627.1;AJY70093.1;ADI83199.1;AAR33700.1	BamA/TamA;MULTISPECIES:;membrane;outer	0.346585	0.527797	0.970495	0	0	329414	428277	467717	348003	806620	403541
AAR33703.1;ADI83202.1;AJY70096.1;QVW35630.1;UAC04454.1;UTG93070.1;WP_010941039.1	UTG93070.1;UAC04454.1;QVW35630.1;WP_119331641.1;BBA68913.1;WP_010941039.1;AJY70096.1;ADI83202.1;AAR33703.1	alpha-glucan;glycosyltransferase	0.019679	0.870492	0.995781	0	0	4360000	3420000	3870000	3690000	4020000	4100000
AAR33704.2;ADI83203.1;AJY70097.1;CBF90718.1;CBG02319.1;CBV04238.1;CBV15839.1;QVW35631.1;UAC04455.1;UTG93071.1;WP_010941040.1	WP_010941040.1;UTG93071.1;UAC04455.1;QVW35631.1;AJY70097.1;AAR33704.2;ADI83203.1;CBV15839.1;CBV04238.1;CBG02319.1;CBF90718.1	Fis;sigma-54;sigma-54-dependent;unnamed	0.267136	0.594328	0.970495	0	0	461621	193099	683654	452790	600238	557593
AAR33707.1;ADI83206.1;AJY70099.1;BBA68917.1;BEH08715.1;QVW35633.1;UAC04457.1;UTG93073.1;WP_010941043.1;WP_045667910.1;WP_119331644.1	BEH08715.1;UTG93073.1;WP_119331644.1;WP_045667910.1;WP_010941043.1;UAC04457.1;QVW35633.1;BBA68917.1;AJY70099.1;ADI83206.1;AAR33707.1	Aminomethyltransferase;glycine	0.378735	0.336702	0.970495	0	0	139133	311939	274951	314492	383860	245624
AAR33708.1;ADI83207.1;AJY70100.1;BBA68918.1;BEH08716.1;CBM34915.1;QVW35634.1;UAC04458.1;UTG93074.1;WP_010941044.1;WP_119331645.1;WP_324309406.1	WP_324309406.1;WP_119331645.1;WP_010941044.1;BEH08716.1;UTG93074.1;UAC04458.1;QVW35634.1;BBA68918.1;AJY70100.1;ADI83207.1;AAR33708.1;CBM34915.1	Glycine;glycine;unnamed	-0.197613	0.702839	0.974322	0	0	875266	968603	1340000	376309	1040000	1360000
AAR33709.1;ADI83208.1;AJY70101.1;QVW35635.1;UAC04459.1;UTG93075.1;WP_010941045.1;WP_045667911.1	UTG93075.1;UAC04459.1;QVW35635.1;WP_119331646.1;WP_045667911.1;WP_010941045.1;BBA68919.1;AJY70101.1;ADI83208.1;AAR33709.1	aminomethyl-transferring;glycine	0.343022	0.267172	0.970495	0	0	823332	1060000	911439	1050000	984917	1510000
AAR33710.1;ADI83209.1;UAC04460.1;UTG93076.1;WP_010941046.1	UTG93076.1;UAC04460.1;WP_214302897.1;QVW35636.1;WP_119331647.1;WP_010941046.1;BBA68920.1;AJY70102.1;ADI83209.1;AAR33710.1	aminomethyl-transferring;glycine	0.304418	0.18345	0.970495	0	0	3390000	3100000	2960000	3890000	4550000	3230000
AAR33711.1;ADI83210.1;AJY70103.1;BBA68921.1;QVW36887.1;UAC05756.1;UTG94386.1;WP_010941047.1;WP_119331648.1	WP_119331648.1;UTG94386.1;UAC05756.1;QVW36887.1;BBA68921.1;WP_010941047.1;AJY70103.1;ADI83210.1;AAR33711.1	Octanoyltransferase;lipoate--protein	-0.960683	0.162491	0.970495	0	0	494878	1170000	834876	569140	312566	402702
AAR33714.1;ADI83213.1;AJY70106.1;BBA68924.1;BEH08722.1;QVW35639.1;UAC04463.1;UTG93079.1;WP_010941050.1;WP_119331651.1;WP_286351354.1	WP_286351354.1;WP_010941050.1;WP_119331651.1;BEH08722.1;UTG93079.1;UAC04463.1;QVW35639.1;BBA68924.1;AJY70106.1;ADI83213.1;AAR33714.1	MULTISPECIES:;OsmC;hypothetical;osmotically	0.144604	0.550573	0.970495	0	0	717991	802585	1010000	1120000	920449	756918
AAR33715.1;ADI83214.1;AJY70107.1;BBA68925.1;QVW35640.1;UAC04464.1;UTG93080.1;WP_010941051.1	WP_286351355.1;WP_010941051.1;BEH08723.1;UTG93080.1;UAC04464.1;QVW35640.1;BBA68925.1;AJY70107.1;ADI83214.1;AAR33715.1	FKBP-type;peptidylprolyl	0.385563	0.0789202	0.970495	0	0	6790000	7440000	7280000	8330000	10700000	9070000
AAR33716.1;ADI83215.1;AJY70108.1;BBA68926.1;BEH08724.1;QVW35641.1;UAC04465.1;UTG93081.1;WP_010941052.1;WP_119331652.1;WP_286351356.1;WP_324309409.1	WP_119331652.1;WP_286351356.1;WP_010941052.1;WP_324309409.1;BEH08724.1;UTG93081.1;UAC04465.1;QVW35641.1;BBA68926.1;AJY70108.1;ADI83215.1;AAR33716.1	MULTISPECIES:;ferritin;ferritin-like;hypothetical	-0.501797	0.560892	0.970495	0	0	1340000	2870000	1320000	2620000	375213	910221
AAR33717.1;ADI83216.1;AJY70109.1;QVW35642.1;UAC04466.1;UTG93082.1;WP_010941053.1;WP_045667913.1	WP_010941053.1;WP_045667913.1;UTG93082.1;UAC04466.1;QVW35642.1;AJY70109.1;ADI83216.1;AAR33717.1	NAD(P)H-binding;NAD-dependent	0.0970478	0.564026	0.970495	0	0	1910000	1400000	1720000	1670000	1700000	2010000
AAR33720.1;ADI83219.1;AJY70112.1;BBA68930.1;BEH08728.1;QVW35645.1;UAC04469.1;UTG93085.1	BEH08728.1;UTG93085.1;UAC04469.1;QVW35645.1;BBA68930.1;AJY70112.1;ADI83219.1;AAR33720.1	DUF47;hypothetical;phosphate	0.593323	0.0426347	0.952267	0	0	868602	1100000	967666	1710000	1460000	1260000
AAR33724.1;ADI83223.1;QVW35649.1;UAC04473.1;UTG93089.1;WP_010941060.1;WP_254278292.1	WP_010941060.1;WP_254278292.1;UTG93089.1;UAC04473.1;QVW35649.1;ADI83223.1;AAR33724.1	efflux	-0.709939	0.106915	0.970495	0	0	724704	892627	1190000	628646	721235	366370
AAR33726.1;ADI83225.1;AJY70119.1;BBA68936.1;BEH08734.1;QVW35651.1;UAC04475.1;UTG93091.1;WP_010941062.1;WP_014551298.1;WP_119331659.1;WP_214302898.1;WP_254278293.1;WP_286351364.1;WP_324309415.1	WP_214302898.1;WP_014551298.1;WP_254278293.1;WP_286351364.1;WP_324309415.1;BEH08734.1;WP_119331659.1;WP_010941062.1;UTG93091.1;UAC04475.1;QVW35651.1;BBA68936.1;AJY70119.1;ADI83225.1;AAR33726.1	Antibiotic;MULTISPECIES:;efflux;multidrug	1.03938	0.110338	0.970495	0	0	780927	365906	587681	775027	1180000	1610000
AAR33733.1;ADI83232.1;AJY70126.1;QVW35658.1;UAC04482.1;UTG93098.1;WP_010941069.1	WP_010941069.1;WP_286351370.1;BEH08741.1;WP_119331665.1;UTG93098.1;UAC04482.1;QVW35658.1;BBA68943.1;AJY70126.1;ADI83232.1;AAR33733.1	chemotaxis;methyl-accepting	0.481866	0.196766	0.970495	0	0	442749	257487	568242	633409	606970	531112
AAR33735.1;ADI83234.1;AJY70128.1;BBA68945.1;BEH08743.1;QVW35660.1;UAC04484.1;UTG93100.1;WP_010941071.1;WP_039648001.1	WP_039648001.1;WP_010941071.1;BEH08743.1;UTG93100.1;UAC04484.1;QVW35660.1;BBA68945.1;AJY70128.1;ADI83234.1;AAR33735.1	Chemotaxis;MULTISPECIES:;chemotaxis;response	0.496246	0.1261	0.970495	0	0	747582	768962	1220000	1420000	1070000	1370000
AAR33736.1;ADI83235.2;AJY70129.1;BBA68946.1;BEH08744.1;QVW35661.1;UAC04485.1;UTG93101.1;WP_010941072.1;WP_119331666.1	WP_119331666.1;WP_010941072.1;BEH08744.1;UTG93101.1;UAC04485.1;QVW35661.1;BBA68946.1;AJY70129.1;ADI83235.2;AAR33736.1	CheY-P;chemotaxis;protein	-0.293527	0.579223	0.970495	0	0	426767	247171	679582	349057	330619	424668
AAR33759.1;ADI83259.2;AJY70151.1;BBA68970.1;QVW35684.1;UAC04508.1;UTG93124.1;WP_010941096.1;WP_119331682.1	WP_010941096.1;WP_119331682.1;UTG93124.1;UAC04508.1;QVW35684.1;BBA68970.1;AJY70151.1;ADI83259.2;AAR33759.1	SH3;bacterial;hypothetical;peptide-binding	-0.196166	0.169165	0.970495	0	0	6150000	6550000	5470000	4650000	5430000	5780000
AAR33766.1;ADI83266.1;AJY70158.1;BBA68977.1;BEH08775.1;QVW35691.1;UAC04515.1;UTG93131.1;WP_010941103.1;WP_119331689.1;WP_214302902.1	BEH08775.1;UTG93131.1;UAC04515.1;WP_214302902.1;QVW35691.1;WP_119331689.1;BBA68977.1;WP_010941103.1;AJY70158.1;ADI83266.1;AAR33766.1	hypothetical;thiamin;thiamine	0.351695	0.291415	0.970495	0	0	1120000	824607	1480000	1420000	1170000	1780000
AAR33769.1;ADI83275.1;AJY70161.1;BBA68980.1;BEH08782.1;QVW35699.1;UAC04518.1;UTG93134.1;WP_010941106.1;WP_119334024.1;WP_254278299.1;WP_324309438.1	WP_254278299.1;WP_119334024.1;WP_010941106.1;WP_324309438.1;BEH08782.1;UTG93134.1;UAC04518.1;QVW35699.1;BBA68980.1;AJY70161.1;ADI83275.1;AAR33769.1	3-octaprenyl-4-hydroxybenzoate;UbiD;hypothetical	0.16575	0.518391	0.970495	0	0	801975	462539	644237	733175	754917	653047
AAR33770.1;ADI83276.1;AJY70162.1;BBA68981.1;UAC04519.1;UTG93135.1;WP_010941107.1;WP_119331691.1;WP_324309439.1	WP_324309439.1;UTG93135.1;UAC04519.1;QVW35700.1;WP_119331691.1;BBA68981.1;AJY70162.1;WP_010941107.1;ADI83276.1;AAR33770.1	hypothetical;lipoprotein;lipoprotein,	0.212623	0.715701	0.974604	0	0	328595	84517	451187	319619	300527	381398
AAR33772.1;ADI83278.2;AJY70163.1;QVW35701.1;UAC04520.1;UTG93136.1;WP_010941109.1;WP_014551310.1	WP_286351403.1;WP_014551310.1;WP_010941109.1;WP_119331692.1;BEH08785.1;UTG93136.1;UAC04520.1;QVW35701.1;BBA68983.1;AJY70163.1;ADI83278.2;AAR33772.1	UbiX;aromatic;menaquinone	-0.429604	0.257664	0.970495	0	0	1670000	2620000	3010000	1390000	1930000	2100000
AAR33773.1;UAC04521.1;WP_010941110.1	BEH08786.1;UTG93137.1;UAC04521.1;QVW35702.1;WP_119331693.1;WP_014551311.1;WP_010941110.1;BBA68984.1;AJY70164.1;ADI83279.1;AAR33773.1	aminofutalosine;dehypoxanthinylfutalosine	-0.0786855	0.706777	0.974322	0	0	4290000	4810000	6160000	4360000	4580000	5510000
AAR33774.1;ADI83280.1;AJY70165.1;QVW35703.1;UAC04522.1;UTG93138.1;WP_010941111.1;WP_014551312.1;WP_235044953.1	WP_014551312.1;WP_324309440.1;BEH08787.1;WP_235044953.1;WP_119331694.1;WP_010941111.1;UTG93138.1;UAC04522.1;QVW35703.1;BBA68985.1;AJY70165.1;ADI83280.1;AAR33774.1	cyclic;dehypoxanthine;dehypoxanthinylfutalosine;hypothetical	0.779158	0.114255	0.970495	0	0	5310000	2470000	6170000	10300000	7440000	6200000
AAR33775.1;UAC04523.1;WP_010941112.1	WP_045667925.1;WP_010941112.1;WP_254278300.1;UTG93139.1;UAC04523.1;QVW35704.1;AJY70166.1;AAR33775.1	HRDC;ribonuclease	-0.170315	0.230053	0.970495	0	0	3100000	2800000	3350000	3100000	2510000	2610000
AAR33776.1;AJY70167.1;BBA68987.1;QVW35705.1;UAC04524.1;WP_010941113.1;WP_119331696.1	UAC04524.1;QVW35705.1;WP_119331696.1;BBA68987.1;AJY70167.1;AAR33776.1;WP_010941113.1	hypothetical	0.865396	0.0420184	0.952267	0	0	1090000	1020000	1370000	1630000	2350000	2360000
AAR33778.1;ADI83283.1;AJY70168.1;BEH08790.1;QVW35706.1;UAC04525.1;UTG93141.1;WP_010941114.1	BEH08790.1;UTG93141.1;UAC04525.1;QVW35706.1;WP_010941114.1;AJY70168.1;ADI83283.1;AAR33778.1	16S	0.151423	0.774112	0.988715	0	0	278239	128359	440279	233516	341028	366052
AAR33780.1;ADI83285.1;AJY71923.1;BBA68990.1;QVW35707.1;UAC04527.1;UTG93143.1;WP_010941116.1;WP_119331699.1	WP_119331699.1;WP_010941116.1;UTG93143.1;UAC04527.1;QVW35707.1;BBA68990.1;AJY71923.1;ADI83285.1;AAR33780.1	M20;hydrolase;p-aminobenzoyl-glutamate;zinc-dependent	-0.0486621	0.882384	0.995781	0	0	2600000	1560000	1870000	2340000	1380000	2110000
AAR33783.1;ADI83287.1;AJY70171.1;BBA68992.1;CBG21364.1;CBG22104.1;CBV34622.1;CBV35283.1;QVW35709.1;UAC04529.1;UTG93145.1	BEH08794.1;UTG93145.1;UAC04529.1;QVW35709.1;BBA68992.1;AJY70171.1;ADI83287.1;AAR33783.1;CBV35283.1;CBV34622.1;CBG22104.1;CBG21364.1	Response;response;transcriptional;unnamed;winged-helix	0.112915	0.398136	0.970495	0	0	4980000	5420000	4340000	5880000	5010000	5050000
AAR33784.1;ADI83288.1;AJY70172.1;QVW35710.1;UAC04530.1;UTG93146.1;WP_010941119.1;WP_014551315.1;WP_254278303.1	WP_254278303.1;WP_286351413.1;WP_119331701.1;WP_014551315.1;WP_010941119.1;BEH08795.1;UTG93146.1;UAC04530.1;QVW35710.1;BBA68993.1;AJY70172.1;ADI83288.1;AAR33784.1	HAMP;histidine;sensor	0.121306	0.685016	0.973029	0	0	2730000	1470000	2640000	2200000	2430000	2810000
AAR33786.1;AJY70174.1;QVW35712.1;UAC04532.1;UTG93148.1;WP_010941121.1	BEH08797.1;UTG93148.1;UAC04532.1;QVW35712.1;WP_014551317.1;WP_010941121.1;AJY70174.1;ADI83290.1;AAR33786.1	1,4-dihydroxy-6-naphthoate	0.19815	0.65769	0.97248	0	0	553608	726420	242876	673615	553263	520238
AAR33788.1;ADI83292.1;AJY70176.1;QVW35714.1;UAC04534.1;UTG93150.1;WP_010941123.1;WP_254278304.1	WP_286351417.1;WP_254278304.1;WP_324309445.1;WP_119331705.1;WP_010941123.1;BEH08799.1;UTG93150.1;UAC04534.1;QVW35714.1;BBA68997.1;AJY70176.1;ADI83292.1;AAR33788.1	MMPL;RND;efflux;exporter,	-0.253838	0.44837	0.970495	0	0	1640000	1930000	1090000	988167	1500000	1420000
AAR33789.1;ADI83293.1;AJY70177.1;BBA68998.1;QVW35715.1;UAC04535.1;WP_010941124.1;WP_119331706.1	WP_010941124.1;UAC04535.1;QVW35715.1;WP_119331706.1;BBA68998.1;AJY70177.1;ADI83293.1;AAR33789.1	hypothetical;membrane;outer	-0.0423108	0.633093	0.970495	0	0	1180000	1160000	1120000	1030000	1230000	1100000
AAR33790.1;ADI83295.1;AJY70179.1;QVW35717.1;UAC04537.1;UTG93153.1;WP_010941126.1;WP_119331708.1	WP_119331708.1;WP_010941126.1;UTG93153.1;UAC04537.1;QVW35717.1;AJY70179.1;ADI83295.1;AAR33790.1	(3R)-hydroxyacyl-(acyl;3-hydroxyacyl-ACP;hydroxymyristoyl-ACP	0.0497352	0.84712	0.991407	0	0	492310	399407	660646	581223	454806	570783
AAR33791.1;ADI83296.1;AJY71924.1;QVW35718.1;UAC04538.1;WP_010941127.1	WP_010941127.1;UAC04538.1;QVW35718.1;AJY71924.1;ADI83296.1;AAR33791.1	3-oxoacyl-(acyl;beta-ketoacyl	0.564342	0.0872737	0.970495	0	1	636974	527717	346484	694261	819413	720920
AAR33792.1;ADI83297.1;AJY70180.1;BBA69002.1;QVW35719.1;UAC04539.1;WP_010941128.1;WP_119331709.1	WP_119331709.1;WP_010941128.1;UAC04539.1;QVW35719.1;BBA69002.1;AJY70180.1;ADI83297.1;AAR33792.1	3-oxoacyl-(acyl;3-oxoacyl-[acyl-carrier-protein];beta-ketoacyl;beta-ketoacyl-[acyl-carrier-protein]	0.840444	0.0961499	0.970495	1	0	156131	125330	138544	327798	213709	210555
AAR33793.1;ADI83298.1;AJY70181.1;CBF61738.1;CBU86614.1;QVW35720.1;UAC04540.1;WP_010941129.1	BEH08805.1;WP_119331710.1;WP_010941129.1;UTG93155.1;UAC04540.1;QVW35720.1;BBA69003.1;AJY70181.1;ADI83298.1;AAR33793.1;CBU86614.1;CBF61738.1	3-oxoacyl-(acyl;3-oxoacyl-ACP;unnamed	-0.043025	0.929563	1	0	0	1990000	2360000	770451	1700000	1960000	1310000
AAR33798.1;ADI83315.1;AJY70186.1;QVW35725.1;UAC04545.1;UTG93175.1;WP_010941134.1;pdb|4AAL|A;pdb|4AAL|B;pdb|4AAM|A;pdb|4AAN|A;pdb|4AAO|A;pdb|4AAO|B	WP_010941134.1;pdb|4AAN|A;pdb|4AAM|A;pdb|4AAL|B;pdb|4AAL|A;WP_324309465.1;pdb|4AAO|B;pdb|4AAO|A;UTG93175.1;UAC04545.1;QVW35725.1;WP_119331715.1;BBA69008.1;AJY70186.1;ADI83315.1;AAR33798.1	Chain;cytochrome;cytochrome-c	-0.310967	0.527583	0.970495	0	0	9430000	3750000	6160000	5290000	5480000	4820000
AAR33805.1;ADI83322.1;AJY70192.1;BBA69015.1;QVW35730.1;UAC04551.1;UTG93181.1;WP_010941141.1;WP_119331721.1;WP_254278327.1	WP_254278327.1;WP_119331721.1;WP_010941141.1;UTG93181.1;UAC04551.1;QVW35730.1;BBA69015.1;AJY70192.1;ADI83322.1;AAR33805.1	helix-turn-helix;hypothetical;transcriptional	-0.310076	0.515025	0.970495	0	0	399906	509680	422024	270899	230830	572347
AAR33808.1;ADI83326.1;AJY70195.1;BBA69018.1;BEH08829.1;QVW35733.1;UAC04554.1;UTG93184.1;WP_010941144.1;WP_119331724.1;WP_254278328.1;WP_286351442.1;WP_324309480.1	WP_286351442.1;WP_119331724.1;WP_324309480.1;WP_254278328.1;WP_010941144.1;BEH08829.1;UTG93184.1;UAC04554.1;QVW35733.1;BBA69018.1;AJY70195.1;ADI83326.1;AAR33808.1	MULTISPECIES:;SAM-dependent;class;hypothetical;protein	0.123148	0.191698	0.970495	0	0	1590000	1620000	1840000	1770000	1920000	1810000
AAR33809.1;ADI83327.1;AJY70196.1;QVW35734.1;UAC04555.1;UTG93185.1;WP_010941145.1	WP_010941145.1;WP_119331725.1;UTG93185.1;UAC04555.1;QVW35734.1;BBA69019.1;AJY70196.1;ADI83327.1;AAR33809.1	HAD	0.120067	0.830478	0.991407	0	0	1180000	1100000	2790000	1480000	2450000	1580000
AAR33810.1;ADI83328.1;AJY70197.1;BBA69020.1;BEH08831.1;QVW35735.1;UAC04556.1;UTG93186.1;WP_010941146.1;WP_324309484.1	WP_010941146.1;WP_324309484.1;BEH08831.1;UTG93186.1;UAC04556.1;QVW35735.1;BBA69020.1;AJY70197.1;ADI83328.1;AAR33810.1	ferritin;ferritin-like;hypothetical	0.187483	0.616054	0.970495	0	0	1620000	1210000	2070000	1830000	2450000	1300000
AAR33811.1;ADI83329.1;AJY70198.1;CAV23589.1;CAV26128.1;CBF66055.1;CBN64881.1;CBU90928.1;QVW35736.1;UAC04557.1;UTG93187.1;WP_010941147.1;WP_014551332.1;WP_045667928.1	WP_324309486.1;BEH08832.1;UTG93187.1;UAC04557.1;QVW35736.1;WP_045667928.1;WP_014551332.1;AJY70198.1;ADI83329.1;AAR33811.1;WP_010941147.1;CBU90928.1;CBN64881.1;CBF66055.1;CAV26128.1;CAV23589.1	aspartate;unnamed	0.265834	0.294852	0.970495	0	0	666627	800442	500502	779184	679121	907367
AAR33812.1;ADI83330.1;AJY70199.1;BBA69022.1;BEH08833.1;QVW35737.1;UAC04558.1;UTG93188.1;WP_010941148.1	BEH08833.1;UTG93188.1;UAC04558.1;QVW35737.1;BBA69022.1;WP_010941148.1;AJY70199.1;ADI83330.1;AAR33812.1	Fe/S;NifU;nitrogen;thioredoxin/NifU-like	0.263181	0.30229	0.970495	0	0	4530000	7020000	4840000	6380000	7310000	5980000
AAR33813.1;ADI83331.1;AJY70200.1;BBA69023.1;QVW35738.1;UAC04559.1;UTG93189.1;WP_010941149.1;WP_119331727.1	UTG93189.1;UAC04559.1;QVW35738.1;WP_119331727.1;BBA69023.1;AJY70200.1;ADI83331.1;AAR33813.1;WP_010941149.1	hypothetical	0.162538	0.51879	0.970495	0	0	2720000	2410000	2920000	2200000	3360000	3450000
AAR33820.1;ADI83338.1;AJY70206.1;BBA69030.1;QVW35744.1;UAC04566.1;UTG93195.1;WP_010941156.1;WP_119331733.1	WP_010941156.1;WP_119331733.1;UTG93195.1;UAC04566.1;QVW35744.1;BBA69030.1;AJY70206.1;ADI83338.1;AAR33820.1	Thioredoxin;thioredoxin;thioredoxin-disulfide	0.0493981	0.874801	0.995781	0	0	5320000	5120000	3340000	3710000	6120000	4430000
AAR33821.1;ADI83339.1;QVW35745.1;UAC04567.1;UTG93196.1;WP_010941157.1	UTG93196.1;UAC04567.1;QVW35745.1;WP_119331734.1;WP_010941157.1;BBA69031.1;AJY70207.1;ADI83339.1;AAR33821.1	YifB;competence	0.306878	0.308073	0.970495	0	0	557675	352783	490165	587537	698011	447062
AAR33822.1;ADI83340.1;BBA69032.1;CBA11098.1;CBF57640.1;CBF66809.1;CBF68667.1;CBU83141.1;CBU91682.1;CBU93541.1;QVW35746.1;UAC04568.1;UTG93197.1;WP_010941158.1	WP_324309321.1;WP_119331485.1;WP_286351517.1;WP_010940849.1;WP_010941158.1;BEH09022.1;BEH08532.1;UTG93197.1;UTG92890.1;UAC04568.1;UAC04274.1;QVW35746.1;QVW35452.1;BBA69032.1;BBA68724.1;AJY70242.1;AJY69910.1;ADI83340.1;ADI83011.1;AAR33822.1;AAR33509.1;CBU93541.1;CBU93540.1;CBU91682.1;CBU91681.1;CBU83141.1;CBU83140.1;CBF66809.1;CBF66808.1;CBF57640.1;CBF57639.1;CBF68667.1;CBF68666.1;CBA11098.1;CBA11…	Succinyl-CoA:coenzyme;acetyl-CoA;succinyl:acetate;unnamed	-0.049582	0.826447	0.991407	0	0	26500000	29200000	18300000	25400000	22300000	23800000
AAR33823.1;ADI83341.1;AJY70243.1;BBA69033.1;CBF85313.1;CBF94626.1;CBF98182.1;CBG06431.1;CBG08183.1;CBG11949.1;CBV01671.1;CBV08146.1;CBV11702.1;CBV19953.1;CBV21705.1;CBV25463.1;QVW35747.1;UAC04569.1;UTG93198.1;WP_010941159.1;WP_119331735.1;WP_254278329.1	WP_254278329.1;WP_010941159.1;WP_119331735.1;UTG93198.1;UAC04569.1;QVW35747.1;BBA69033.1;AJY70243.1;ADI83341.1;AAR33823.1;CBV25463.1;CBV01671.1;CBV21705.1;CBV19953.1;CBV11702.1;CBV08146.1;CBG08183.1;CBG06431.1;CBF98182.1;CBG11949.1;CBF94626.1;CBF85313.1	ATP-dependent;DEAD/DEAH;RNA;unnamed	1.06703	0.00438181	0.694151	0	0	2650000	2810000	2110000	5160000	5930000	4770000
AAR33825.1;ADI83344.1;AJY70245.1;QVW35749.1;UAC04571.1;UTG93200.1;WP_010941161.1;WP_214302906.1;WP_254278330.1	WP_214302906.1;WP_254278330.1;WP_010941161.1;WP_286351520.1;BEH09025.1;WP_119331737.1;UTG93200.1;UAC04571.1;QVW35749.1;BBA69035.1;AJY70245.1;ADI83344.1;AAR33825.1	FAD-dependent;NAD(P)/FAD-dependent;pyridine	-0.142801	0.290379	0.970495	0	0	2380000	2630000	2630000	2250000	2050000	2620000
AAR33828.1;ADI83346.1;AJY70248.1;BBA69037.1;QVW35751.1;UAC04573.1;UTG93202.1;WP_010941163.1;WP_119331739.1;WP_324309502.1	WP_119331739.1;WP_010941163.1;WP_324309502.1;BEH09027.1;UTG93202.1;UAC04573.1;QVW35751.1;BBA69037.1;AJY70248.1;ADI83346.1;AAR33828.1	Macrolide;RND;efflux	0.0498107	0.899557	0.9965	0	0	2040000	806605	1520000	1460000	1500000	1560000
AAR33831.1;ADI83352.1;AJY70253.1;BBA69043.1;BEH09033.1;CAY34388.1;QVW35756.1;UAC04578.1;UTG93207.1;WP_010941168.1;WP_119331744.1	WP_119331744.1;WP_010941168.1;BEH09033.1;UTG93207.1;UAC04578.1;QVW35756.1;BBA69043.1;AJY70253.1;ADI83352.1;AAR33831.1;CAY34388.1	GTP-binding;translation-regulating;translational;unnamed	0.169471	0.273154	0.970495	0	0	1340000	1000000	1190000	1240000	1350000	1380000
AAR33832.1;UAC04579.1;WP_010941169.1	WP_324309508.1;BEH09034.1;WP_254278334.1;UTG93208.1;UAC04579.1;QVW35757.1;WP_119331745.1;BBA69044.1;WP_014551336.1;WP_010941169.1;AJY70254.1;ADI83353.1;AAR33832.1	outer	0.069325	0.788479	0.988936	0	0	6680000	4150000	7250000	5980000	6190000	6800000
AAR33836.1;ADI83357.1;AJY70258.1;QVW35761.1;UAC04583.1;WP_010941173.1	WP_286351528.1;WP_119331749.1;WP_254278338.1;WP_010941173.1;WP_324309510.1;BEH09038.1;UTG93212.1;UAC04583.1;QVW35761.1;BBA69048.1;AJY70258.1;ADI83357.1;AAR33836.1	rhodanese;rhodanese-like;sulfurtransferase	0.132524	0.45233	0.970495	0	0	1260000	1090000	1080000	1400000	1030000	1330000
AAR33842.2;ADI83363.1;AJY70263.1;QVW35767.1;UAC04588.1;UTG93218.1;WP_010941179.1;WP_254278340.1	WP_254278340.1;WP_119331753.1;WP_010941179.1;WP_286351534.1;BEH09044.1;UTG93218.1;UAC04588.1;QVW35767.1;BBA69054.1;AJY70263.1;AAR33842.2;ADI83363.1	aminopeptidase;leucyl;peptidase	-0.0456643	0.889117	0.995781	0	0	507432	708587	391452	482564	435104	639720
AAR33845.1;ADI83366.1;AJY70266.1;BBA69057.1;QVW35770.1;UAC04591.1;UTG93221.1;WP_010941182.1	WP_010941182.1;WP_286351537.1;BEH09047.1;UTG93221.1;UAC04591.1;QVW35770.1;BBA69057.1;AJY70266.1;ADI83366.1;AAR33845.1	IclR;Transcriptional;helix-turn-helix	0.0117336	0.93689	1	0	0	4580000	3760000	5130000	4270000	4660000	4650000
AAR33846.1;ADI83367.1;AJY70267.1;BBA69058.1;BEH09048.1;QVW35771.1;UAC04592.1;UTG93222.1;WP_010941183.1;WP_014551338.1;WP_286351538.1	WP_014551338.1;WP_010941183.1;WP_286351538.1;BEH09048.1;UTG93222.1;UAC04592.1;QVW35771.1;BBA69058.1;AJY70267.1;ADI83367.1;AAR33846.1	MULTISPECIES:;Universal;universal	0.0556887	0.620685	0.970495	0	0	510425	635969	613985	582120	625440	622099
AAR33848.1;ADI83369.1;AJY70269.1;BBA69060.1;QVW35773.1;UAC04594.1;UTG93224.1;WP_010941185.1;WP_119331757.1	WP_286351540.1;WP_010941185.1;WP_119331757.1;WP_324309521.1;BEH09050.1;UTG93224.1;UAC04594.1;QVW35773.1;BBA69060.1;AJY70269.1;ADI83369.1;AAR33848.1	hypothetical;nucleotidyltransferase;putative	-0.132647	0.688201	0.973029	0	0	1220000	931877	1740000	1050000	1360000	1140000
AAR33853.1;ADI83374.2;AJY70274.1;BEH09055.1;QVW35778.1;UAC04599.1;UTG93229.1;WP_010941190.1;WP_286351545.1	WP_286351545.1;WP_119331762.1;WP_010941190.1;BEH09055.1;UTG93229.1;UAC04599.1;QVW35778.1;BBA69065.1;AJY70274.1;ADI83374.2;AAR33853.1	ATP-dependent;DEAD/DEAH;MULTISPECIES:;RNA	0.0664274	0.666807	0.97248	0	0	2140000	1640000	1950000	2250000	1830000	1920000
AAR33854.1;ADI83375.1;AJY70275.1;QVW35779.1;UAC04600.1;UTG93230.1;WP_010941191.1	WP_324309531.1;WP_286351546.1;BEH09056.1;UTG93230.1;UAC04600.1;QVW35779.1;WP_119331763.1;WP_010941191.1;BBA69066.1;AJY70275.1;ADI83375.1;AAR33854.1	aminobenzoate;aminodeoxychorismate;pyridoxal-5'-phosphate-dependent	-0.0434598	0.923878	1	0	0	307701	774516	785259	590320	466915	754824
AAR33855.2;ADI83376.1;AJY70276.1;QVW35780.1;UAC04601.1;WP_010941192.1	WP_286351547.1;WP_254278343.1;WP_010941192.1;BEH09057.1;UTG93231.1;UAC04601.1;QVW35780.1;AJY70276.1;AAR33855.2;ADI83376.1	TIGR02757;hypothetical;protein	0.38877	0.330211	0.970495	1	0	127939	129429	195209	249116	131670	211762
AAR33857.1;ADI83378.1;AJY70278.1;BBA69069.1;BEH09059.1;QVW35782.1;UAC04603.1;UTG93233.1;WP_010941194.1;WP_119331766.1;WP_214302908.1;WP_286351549.1;WP_324309537.1	WP_324309537.1;WP_286351549.1;WP_214302908.1;WP_119331766.1;WP_010941194.1;BEH09059.1;UTG93233.1;UAC04603.1;QVW35782.1;BBA69069.1;AJY70278.1;ADI83378.1;AAR33857.1	O-acetyl-ADP-ribose;macro	0.000891893	0.998136	1	0	0	444781	676101	615847	392498	532434	812871
AAR33858.1;ADI83379.1;AJY70279.1;QVW35783.1;UAC04604.1;UTG93234.1;WP_010941195.1;pdb|4GVL|A;pdb|4GVL|B;pdb|4GVL|C;pdb|4GVL|D;pdb|4GX0|A;pdb|4GX0|B;pdb|4GX0|C;pdb|4GX0|D;pdb|4GX1|A;pdb|4GX1|B;pdb|4GX1|C;pdb|4GX1|D;pdb|4GX2|A;pdb|4GX2|B;pdb|4GX2|C;pdb|4GX2|D;pdb|4GX5|A;pdb|4GX5|B;pdb|4GX5|C;pdb|4GX5|D	WP_286351550.1;WP_010941195.1;pdb|4GX5|D;pdb|4GX5|C;pdb|4GX5|B;pdb|4GX5|A;pdb|4GX2|D;pdb|4GX2|C;pdb|4GX2|B;pdb|4GX2|A;pdb|4GX1|D;pdb|4GX1|C;pdb|4GX1|B;pdb|4GX1|A;pdb|4GX0|D;pdb|4GX0|C;pdb|4GX0|B;pdb|4GX0|A;pdb|4GVL|D;pdb|4GVL|C;pdb|4GVL|B;pdb|4GVL|A;BEH09060.1;UTG93234.1;UAC04604.1;QVW35783.1;AJY70279.1;ADI83379.1;AAR33858.1	Chain;NAD-binding;TrkA;potassium	-0.0679768	0.778713	0.988715	0	0	1290000	1460000	2030000	1520000	1410000	1630000
AAR33859.1;ADI83380.1;AJY70280.1;QVW35784.1;UAC04605.1;UTG93235.1;WP_010941196.1;WP_014551339.1	WP_286351551.1;WP_119331768.1;WP_014551339.1;WP_010941196.1;BEH09061.1;UTG93235.1;UAC04605.1;QVW35784.1;BBA69071.1;AJY70280.1;ADI83380.1;AAR33859.1	ferredoxin;nitroreductase	0.153728	0.584114	0.970495	0	0	1520000	1090000	1570000	1660000	1850000	1140000
AAR33861.1;ADI83382.1;AJY70282.1;QVW35786.1;UAC04607.1;UTG93237.1;WP_010941198.1;WP_014551341.1	WP_014551341.1;WP_010941198.1;UTG93237.1;UAC04607.1;QVW35786.1;AJY70282.1;ADI83382.1;AAR33861.1	HIT;histidine	0.382343	0.320187	0.970495	0	0	564157	533778	517178	839035	813551	452645
AAR33862.1;ADI83383.2;AJY70283.1;QVW35787.1;UAC04608.1;UTG93238.1;WP_010941199.1;WP_302054688.1	WP_324309546.1;WP_302054688.1;BEH09064.1;UTG93238.1;UAC04608.1;QVW35787.1;WP_119331771.1;WP_010941199.1;BBA69074.1;AJY70283.1;ADI83383.2;AAR33862.1	diaminopimelate	0.517695	0.13852	0.970495	0	0	6580000	6960000	5850000	11600000	7610000	8550000
AAR33865.1;ADI83386.1;AJY70286.1;BBA69077.1;BEH09067.1;QVW35790.1;UAC04611.1;UTG93241.1;WP_010941202.1;WP_039642801.1	WP_039642801.1;WP_010941202.1;BEH09067.1;UTG93241.1;UAC04611.1;QVW35790.1;BBA69077.1;AJY70286.1;ADI83386.1;AAR33865.1	HTH-type;MULTISPECIES:;RrF2;Rrf2;helix-turn-helix	-0.0522945	0.90115	0.9965	0	0	19500000	18700000	23600000	19200000	29000000	11400000
AAR33866.1;ADI83387.1;AJY70287.1;CBF70719.1;CBF85991.1;CBF88510.1;CBF95030.1;CBF99316.1;CBG07343.1;CBL74077.1;CBL75674.1;CBU94869.1;CBV01975.1;CBV03070.1;CBV08550.1;CBV12836.1;CBV20865.1;QVW35791.1;UAC04612.1;UTG93242.1;WP_010941203.1	BEH09068.1;UTG93242.1;UAC04612.1;QVW35791.1;WP_119331773.1;WP_010941203.1;BBA69078.1;AJY70287.1;ADI83387.1;AAR33866.1;CBV01975.1;CBU94869.1;CBV20865.1;CBV08550.1;CBV12836.1;CBV03070.1;CBL74077.1;CBL75674.1;CBG07343.1;CBF99316.1;CBF95030.1;CBF88510.1;CBF85991.1;CBF70719.1	cysteine;unnamed	0.00204493	0.994096	1	0	0	26200000	27400000	16900000	26900000	25300000	18400000
AAR33867.1;UAC04613.1;WP_010941204.1	WP_324309553.1;BEH09069.1;UTG93243.1;UAC04613.1;QVW35792.1;WP_010941204.1;WP_119331774.1;BBA69079.1;AJY70288.1;ADI83388.1;AAR33867.1	ATP-dependent;adenosine	0.114317	0.680082	0.973029	0	0	6830000	6570000	3820000	6870000	5990000	5780000
AAR33869.1;ADI83390.1;AJY70290.1;QVW35794.1;UAC04615.1;UTG93245.1;WP_010941206.1	WP_010941206.1;UTG93245.1;UAC04615.1;QVW35794.1;AJY70290.1;ADI83390.1;AAR33869.1	ATP-independent;Hsp20/alpha;MULTISPECIES:;molecular	-0.778858	0.493755	0.970495	0	0	14300000	3560000	3570000	4220000	5160000	3110000
AAR33873.1;ADI83394.1;AJY70293.1;QVW35797.1;UAC04618.1;UTG93249.1;WP_010941210.1	WP_010941210.1;WP_286351561.1;WP_119331779.1;pdb|3EZU|A;BEH09075.1;UTG93249.1;UAC04618.1;QVW35797.1;BBA69085.1;AJY70293.1;ADI83394.1;AAR33873.1	GGDEF;MULTISPECIES:;diguanylate	0.428857	0.101616	0.970495	0	0	1020000	1150000	868257	1600000	1140000	1350000
AAR33877.1;ADI83399.1;AJY70297.1;BBA69089.1;BEH09079.1;QVW35801.1;UAC04622.1;UTG93253.1;WP_010941214.1;WP_039642830.1;WP_066356989.1	WP_039642830.1;WP_066356989.1;WP_010941214.1;BEH09079.1;UTG93253.1;UAC04622.1;QVW35801.1;BBA69089.1;AJY70297.1;ADI83399.1;AAR33877.1	MULTISPECIES:;Peptide;peptide;peptidyl-tRNA	0.417211	0.0498866	0.970495	0	0	375790	361780	483641	557209	498940	574587
AAR33878.1;AJY70298.1;QVW35802.1;UAC04623.1;WP_010941215.1	WP_324309569.1;WP_254278346.1;WP_119331783.1;WP_014551343.1;WP_010941215.1;BEH09080.1;UTG93254.1;UAC04623.1;QVW35802.1;BBA69090.1;AJY70298.1;ADI83400.1;AAR33878.1	DNA;endonuclease	0.198441	0.366781	0.970495	0	0	2080000	1490000	2330000	2190000	2150000	2430000
AAR33880.1;AJY70300.1;QVW35804.1;UAC04625.1;WP_010941217.1	WP_119331785.1;WP_010941217.1;WP_014551345.1;UAC04625.1;QVW35804.1;BBA69092.1;AJY70300.1;ADI83402.1;AAR33880.1	SAM-dependent;class	0.208493	0.400728	0.970495	0	0	580097	387025	652696	639565	625545	606558
AAR33883.1;UAC04627.1	UAC04627.1;AAR33883.1	RNA-directed;reverse	0.732344	0.43934	0.970495	0	0	114039	81641	717698	378595	497622	641211
AAR33886.1;AAR34092.1;AAR34731.1;AAR35224.1;AAR35503.1;AAR35515.1;AAR35546.1;AAR35656.1;AAR35765.1;AAR36473.1;ADI83403.1;ADI83603.1;ADI84186.1;ADI84681.1;ADI85040.1;ADI85147.1;ADI85833.1;AJY68418.1;AJY68614.1;AJY68623.1;AJY68884.1;AJY70803.1;AJY71053.1;UAC02589.1;UAC02853.1;UAC02892.1;UAC03095.1;UAC03748.1;UAC04053.1;UAC04630.1;UAC04824.1;UAC04827.1;UAC05379.1;WP_010941222.1	WP_010941222.1;UAC05379.1;UAC04827.1;UAC04824.1;UAC04630.1;UAC04053.1;UAC03748.1;UAC03095.1;UAC02892.1;UAC02853.1;UAC02589.1;WP_214302962.1;WP_214302652.1;QVW36205.1;QVW36015.1;QVW36002.1;QVW34422.1;WP_045667374.1;AJY71053.1;AJY70803.1;AJY68894.1;AJY68884.1;AJY68630.1;AJY68623.1;AJY68614.1;AJY68418.1;ADI85833.1;ADI85147.1;ADI85040.1;ADI84681.1;ADI84186.1;ADI83603.1;ADI83403.1;AAR36473.1;AAR35765.…	IS3;hypothetical;protein	-0.288612	0.391406	0.970495	0	0	11400000	8690000	6770000	8800000	7770000	5420000
AAR33890.1;AAR34673.1;AAR35970.1;UAC03296.1;UAC04633.1;UAC05324.1;WP_010941225.1	WP_010941225.1;UAC05324.1;UAC04633.1;UAC03296.1;AAR35970.1;AAR34673.1;AAR33890.1	IS5-like;transposase	0.168071	0.59992	0.970495	1	0	318148	285736	246607	425937	285624	244013
AAR33893.1;QVW35810.1;UAC04634.1;WP_010941226.1	WP_254278354.1;WP_010941226.1;WP_286351571.1;BEH09087.1;UTG93263.1;UAC04634.1;QVW35810.1;AAR33893.1	dihydrofolate;hypothetical	0.190808	0.119479	0.970495	0	0	2800000	3020000	3020000	3070000	3360000	3660000
AAR33900.1;AJY70324.1;UAC04640.1;WP_010941232.1	WP_010941232.1;UAC04640.1;AJY70324.1;AAR33900.1	cysteine;isochorismatase;nicotinamidase-related	-0.263034	0.525172	0.970495	0	0	2090000	1230000	1120000	1530000	1010000	1160000
AAR33901.1;ADI83411.1;AJY70325.1;BEH09096.1;UAC04641.1;UTG93273.1;WP_010941233.1;WP_254278360.1	WP_214302914.1;WP_254278360.1;WP_010941233.1;BEH09096.1;UTG93273.1;UAC04641.1;QVW35817.1;AJY70325.1;ADI83411.1;AAR33901.1	MULTISPECIES:;SAM-dependent;class	0.274175	0.483668	0.970495	0	0	1040000	1790000	1900000	1810000	1390000	2520000
AAR33902.1;BEH09097.1;UAC04642.1;UTG93274.1;WP_010941234.1;WP_286351577.1	WP_014551353.1;WP_010941234.1;WP_286351577.1;BEH09097.1;UTG93274.1;UAC04642.1;ADI83412.1;AAR33902.1	MULTISPECIES:;dihydrofolate	0.666207	0.0381	0.948398	0	0	355674	231784	348628	513254	561275	410942
AAR33903.2;AJY70327.1;UAC04643.1;UTG93275.1;WP_010941235.1	BEH09098.1;UTG93275.1;WP_214302916.1;WP_014551354.1;WP_010941235.1;UAC04643.1;QVW35819.1;AJY70327.1;AAR33903.2;ADI83413.2	HAD-IA;hydrolase;hydrolase,	0.286365	0.409163	0.970495	0	0	450410	333445	680776	653383	522981	609847
AAR33904.1;AJY70328.1;UAC04644.1;UTG93276.1;WP_010941236.1	BEH09099.1;UTG93276.1;WP_214302917.1;UAC04644.1;QVW35820.1;WP_119331801.1;WP_014551355.1;WP_010941236.1;BBA69112.1;AJY70328.1;ADI83414.1;AAR33904.1	alcohol;zinc-dependent	-1.91077	0.00419434	0.694151	1	0	532106	431193	408665	125556	85223	154095
AAR33911.1;ADI83421.1;AJY70335.1;BBA69119.1;QVW35827.1;UAC04651.1;UTG93283.1;WP_010941243.1;WP_014551357.1	WP_014551357.1;WP_010941243.1;BEH09106.1;UTG93283.1;UAC04651.1;QVW35827.1;BBA69119.1;AJY70335.1;ADI83421.1;AAR33911.1	Pyruvate,;pyruvate;pyruvate,	0.180863	0.0670227	0.970495	0	0	28100000	31500000	28000000	34200000	34100000	31000000
AAR33912.1;ADI83422.1;AJY70336.1;BBA69120.1;BEH09107.1;CBF71956.1;CBU95459.1;QVW35828.1;UAC04652.1;UTG93284.1;WP_010941244.1	BEH09107.1;WP_010941244.1;UTG93284.1;UAC04652.1;QVW35828.1;BBA69120.1;AJY70336.1;ADI83422.1;AAR33912.1;CBU95459.1;CBF71956.1	Cold;MULTISPECIES:;cold;cold-shock;unnamed	0.322345	0.516376	0.970495	0	0	5430000	18100000	11100000	15200000	15500000	12600000
AAR33914.2;ADI83424.1;AJY70338.1;BBA69122.1;QVW35830.1;UAC04654.1;UTG93286.1;WP_010941246.1;WP_119331808.1	WP_010941246.1;WP_324309607.1;WP_286351588.1;WP_119331808.1;BEH09109.1;UTG93286.1;UAC04654.1;QVW35830.1;BBA69122.1;AJY70338.1;AAR33914.2;ADI83424.1	HAMP;Putative;chemotaxis;methyl-accepting	0.288345	0.248311	0.970495	0	0	625730	706816	771601	821126	708539	1040000
AAR33915.2;ADI83425.1;AJY70339.1;BBA69123.1;BEH09110.1;QVW35831.1;UAC04655.1;UTG93287.1;WP_010941247.1;WP_119331809.1	BEH09110.1;UTG93287.1;UAC04655.1;QVW35831.1;WP_119331809.1;BBA69123.1;AJY70339.1;AAR33915.2;ADI83425.1;WP_010941247.1	hypothetical	-0.652192	0.315921	0.970495	1	1	111500	158618	278183	88245	98867	161779
AAR33916.1;ADI83426.1;AJY70340.1;BBA69124.1;BEH09111.1;CAY03544.1;QVW35832.1;UAC04656.1;UTG93288.1;WP_010941248.1;WP_119331810.1	BEH09111.1;UTG93288.1;UAC04656.1;QVW35832.1;WP_119331810.1;BBA69124.1;WP_010941248.1;AJY70340.1;ADI83426.1;AAR33916.1;CAY03544.1	Ureidoglycolate;acylpyruvase;fumarylacetoacetate;unnamed	0.573026	0.0329564	0.948398	0	0	1710000	1140000	1600000	2240000	2370000	2010000
AAR33917.1;ADI83427.1;AJY70341.1;BBA69125.1;BEH09112.1;QVW35833.1;UAC04657.1;UTG93289.1;WP_010941249.1;WP_119331811.1;WP_324309610.1	WP_324309610.1;WP_119331811.1;WP_010941249.1;BEH09112.1;UTG93289.1;UAC04657.1;QVW35833.1;BBA69125.1;AJY70341.1;ADI83427.1;AAR33917.1	Oxygen-independent;TIGR01212;radical	-0.246827	0.385429	0.970495	0	0	190624	280424	198030	226582	182923	154359
AAR33920.1;ADI83430.1;AJY70344.1;BEH09115.1;QVW35836.1;UAC04660.1;UTG93292.1	BEH09115.1;UTG93292.1;UAC04660.1;QVW35836.1;AJY70344.1;ADI83430.1;AAR33920.1	sulfur;thiamin	0.17603	0.727316	0.975743	0	0	1500000	1960000	1780000	1300000	1540000	3080000
AAR33922.1;ADI83432.1;AJY70346.1;QVW35838.1;UAC04662.1;UTG93294.1;WP_010941254.1	WP_119331815.1;WP_286351594.1;WP_010941254.1;BEH09117.1;UTG93294.1;UAC04662.1;QVW35838.1;BBA69130.1;AJY70346.1;ADI83432.1;AAR33922.1	HAMP;cytochrome;menaquinol	-0.0987744	0.719832	0.975021	0	0	1130000	728085	1080000	1010000	693660	1040000
AAR33923.1;ADI83433.1;AJY70347.1;QVW35839.1;UAC04663.1;UTG93295.1;WP_010941255.1	BEH09118.1;UTG93295.1;UAC04663.1;QVW35839.1;WP_119331816.1;WP_010941255.1;BBA69131.1;AJY70347.1;ADI83433.1;AAR33923.1	cytochrome;lipoprotein;menaquinol	-0.941381	0.214171	0.970495	0	0	1160000	742713	1900000	1060000	536089	384114
AAR33929.1;ADI83440.1;BEH09124.1;CBF90720.1;CBG02321.1;CBV04240.1;CBV15841.1;QVW35845.1;UAC04669.1;UTG93301.1;WP_010941261.1;WP_286351598.1	WP_286351598.1;WP_119331819.1;BEH09124.1;WP_010941261.1;UTG93301.1;UAC04669.1;QVW35845.1;BBA69137.1;ADI83440.1;AAR33929.1;CBV15841.1;CBV04240.1;CBG02321.1;CBF90720.1	MULTISPECIES:;sigma-54;sigma-54-dependent;unnamed	0.162057	0.524322	0.970495	0	0	6800000	4810000	4120000	5570000	5690000	6340000
AAR33930.2;ADI83441.1;AJY70355.1;BBA69138.1;BEH09125.1;QVW35846.1;UAC04670.1;UTG93302.1;WP_010941262.1;WP_119331820.1;WP_286351599.1	WP_286351599.1;WP_119331820.1;WP_010941262.1;BEH09125.1;UTG93302.1;UAC04670.1;QVW35846.1;BBA69138.1;AJY70355.1;AAR33930.2;ADI83441.1	ATP-binding;HAMP;MULTISPECIES:;Sensor;histidine;sensor	-0.643531	0.102406	0.970495	0	0	426398	377757	351983	172217	220243	347635
AAR33932.2;ADI83442.2;AJY71937.1;UAC04671.1;WP_010941263.1	WP_119334031.1;WP_214302922.1;WP_010941263.1;UTG93303.1;UAC04671.1;QVW35847.1;BBA69139.1;AJY71937.1;AAR33932.2;ADI83442.2	alpha-amylase;glycoside	0.0132237	0.866698	0.99447	0	0	1830000	1950000	1650000	1850000	1820000	1810000
AAR33934.2;ADI83444.2;AJY70357.1;BEH09128.1;QVW35849.1;UAC04673.1;UTG93305.1;WP_010941265.1;WP_235044957.1	BEH09128.1;UTG93305.1;WP_235044957.1;WP_232008959.1;UAC04673.1;QVW35849.1;BBA69141.1;AJY70357.1;AAR33934.2;ADI83444.2;WP_010941265.1	hypothetical	-0.130665	0.450492	0.970495	0	0	1000000	1170000	1370000	1090000	993472	1150000
AAR33935.1;ADI83445.1;AJY70358.1;QVW35850.1;UAC04674.1;UTG93306.1;WP_010941266.1;WP_214302923.1	WP_324309631.1;BEH09138.1;UTG93306.1;UAC04674.1;WP_214302923.1;QVW35850.1;WP_119331823.1;WP_010941266.1;BBA69142.1;AJY70358.1;ADI83445.1;AAR33935.1	4-amino-5-hydroxymethyl-2-methylpyrimidine-phosphate;phosphomethylpyrimidine	0.371697	0.167975	0.970495	0	0	3430000	4340000	4310000	4050000	5740000	5840000
AAR33941.1;AJY70363.1;QVW35856.1;UAC04680.1;UTG93312.1;WP_010941272.1	WP_324309641.1;WP_286351615.1;WP_119331829.1;WP_014551360.1;WP_010941272.1;BEH09144.1;UTG93312.1;UAC04680.1;QVW35856.1;BBA69148.1;AJY70363.1;ADI83452.1;AAR33941.1	phosphoribosylamine--glycine	0.09757	0.390351	0.970495	0	0	9610000	8880000	7950000	10100000	9540000	8650000
AAR33942.1;BEH09145.1;CAY08719.1;QVW35857.1;UAC04681.1;UTG93313.1;WP_010941273.1	WP_324309643.1;WP_010941273.1;BEH09145.1;UTG93313.1;UAC04681.1;QVW35857.1;AJY70364.1;AAR33942.1;CAY08719.1	5-(carboxyamino)imidazole;5-carboxyamino-1-(5-phosphoribosyl)imidazole;unnamed	0.0837929	0.77111	0.988455	0	0	2580000	2080000	1360000	2180000	2260000	1940000
AAR33944.1;AJY70366.1;QVW35859.1;UAC04683.1;UTG93315.1;WP_010941275.1	WP_119331830.1;WP_014551362.1;WP_010941275.1;UTG93315.1;UAC04683.1;QVW35859.1;BBA69151.1;AJY70366.1;ADI83455.1;AAR33944.1	ResB-like;cytochrome	-0.00102573	0.991184	1	0	0	46900000	49400000	44400000	49700000	48800000	42100000
AAR33945.1;ADI83456.1;AJY70367.1;BBA69152.1;BEH09148.1;QVW35860.1;UAC04684.1;UTG93316.1;WP_014551363.1;WP_119331831.1	WP_324311423.1;BEH09148.1;UTG93316.1;UAC04684.1;QVW35860.1;WP_014551363.1;WP_119331831.1;BBA69152.1;AJY70367.1;ADI83456.1;AAR33945.1	Cytochrome;ResC/HemX-like;c-type;cytochrome	0.260395	0.508049	0.970495	0	0	1680000	979433	1590000	2310000	1490000	1290000
AAR33947.1;ADI83458.1;AJY70368.1;BEH09150.1;QVW35861.1;UAC04685.1;UTG93317.1;WP_010941278.1;WP_014551365.1;WP_324309651.1	WP_324309651.1;WP_014551365.1;WP_010941278.1;BEH09150.1;UTG93317.1;UAC04685.1;QVW35861.1;AJY70368.1;ADI83458.1;AAR33947.1	MULTISPECIES:;cytochrome	0.575962	0.531804	0.970495	1	0	136302	139791	74562	324003	116867	81841
AAR33948.1;AJY70369.1;QVW35862.1;UAC04686.1;UTG93318.1;WP_010941279.1;WP_045667992.1;WP_324309653.1	WP_324309653.1;WP_014551366.1;WP_119331834.1;WP_010941279.1;WP_286351618.1;WP_045667992.1;BEH09151.1;UTG93318.1;UAC04686.1;QVW35862.1;BBA69155.1;AJY70369.1;ADI83459.1;AAR33948.1	6-bladed;MULTISPECIES:;NHL;hypothetical	0.146787	0.485786	0.970495	0	0	3310000	2790000	2490000	3790000	2970000	2750000
AAR33955.1;ADI83465.2;AJY70377.1;BBA69161.1;QVW36895.1;UAC05764.1;UTG94395.1;WP_010941287.1;WP_119331839.1	WP_010941287.1;WP_119331839.1;UTG94395.1;UAC05764.1;QVW36895.1;BBA69161.1;AJY70377.1;ADI83465.2;AAR33955.1	Alpha-D-kanosaminyltransferase;glycoside;glycosyltransferase;glycosyltransferase,	0.660569	0.0440229	0.952267	0	0	229262	182171	278284	399864	397634	292742
AAR33956.1;ADI83466.1;AJY70378.1;BBA69162.1;QVW35868.1;UAC04692.1;UTG93323.1;WP_010941288.1;WP_119331840.1	WP_324309663.1;WP_286351624.1;WP_010941288.1;WP_119331840.1;BEH09158.1;UTG93323.1;UAC04692.1;QVW35868.1;BBA69162.1;AJY70378.1;ADI83466.1;AAR33956.1	helix-turn-helix;hypothetical;transcriptional;winged	-0.786272	0.00118647	0.486465	0	0	763073	855389	810279	499315	460350	448617
AAR33957.1;ADI83467.1;AJY70379.1;BEH09159.1;QVW35869.1;UAC04693.1;UTG93324.1;WP_010941289.1;WP_324309665.1	WP_324309665.1;WP_119331841.1;WP_010941289.1;BEH09159.1;UTG93324.1;UAC04693.1;QVW35869.1;BBA69163.1;AJY70379.1;ADI83467.1;AAR33957.1	GDP-D-mannose;GDP-mannose	-0.0391706	0.835566	0.991407	0	0	1430000	1260000	1790000	1370000	1370000	1620000
AAR33958.1;ADI83468.1;AJY70380.1;QVW35870.1;UAC04694.1;UTG93325.1;WP_010941290.1	WP_324309667.1;WP_286351626.1;WP_119331842.1;WP_010941290.1;BEH09160.1;UTG93325.1;UAC04694.1;QVW35870.1;BBA69164.1;AJY70380.1;ADI83468.1;AAR33958.1	GDP-L-fucose	-0.0408578	0.890157	0.995781	0	0	2090000	1990000	1650000	2120000	2240000	1210000
AAR33961.1;ADI83471.1;AJY70382.1;BBA69167.1;QVW35872.1;UAC04696.1;UTG93327.1;WP_010941293.1;WP_045667994.1;WP_119331844.1	WP_286351629.1;WP_010941293.1;WP_119331844.1;WP_045667994.1;BEH09163.1;UTG93327.1;UAC04696.1;QVW35872.1;BBA69167.1;AJY70382.1;ADI83471.1;AAR33961.1	SAM-dependent;class;putative	-0.0357227	0.916857	0.999308	0	0	671783	400290	373685	540135	406728	463536
AAR33963.1;ADI83473.1;AJY70384.1;BBA69169.1;BEH09165.1;QVW35874.1;UAC04698.1;UTG93329.1;WP_010941295.1;WP_045667995.1;WP_119331846.1;WP_286351631.1;WP_324309675.1	WP_286351631.1;WP_010941295.1;WP_119331846.1;WP_324309675.1;WP_045667995.1;BEH09165.1;UTG93329.1;UAC04698.1;QVW35874.1;BBA69169.1;AJY70384.1;ADI83473.1;AAR33963.1	MULTISPECIES:;SAM-dependent;class;hypothetical;methyltransferase	1.28563	0.227029	0.970495	1	0	146564	118776	110398	492734	130156	293115
AAR33966.2;ADI83476.1;AJY70386.1;BBA69172.1;QVW35877.1;UAC04701.1;UTG93332.1;WP_010941298.1;WP_119331849.1	WP_119331849.1;WP_010941298.1;UTG93332.1;UAC04701.1;QVW35877.1;BBA69172.1;AJY70386.1;AAR33966.2;ADI83476.1	YfhO;hypothetical;membrane	-0.0150273	0.973499	1	0	0	784817	306211	848358	675221	732165	511904
AAR33967.1;ADI83477.1;AJY70387.1;BBA69173.1;BEH09169.1;QVW35878.1;UAC04702.1;UTG94397.1;WP_010941299.1;WP_286351635.1;WP_324309751.1	WP_286351635.1;WP_010941299.1;WP_324309751.1;BEH09169.1;UTG94397.1;UAC04702.1;QVW35878.1;BBA69173.1;AJY70387.1;ADI83477.1;AAR33967.1	MULTISPECIES:;SAM-dependent;methyltransferase;tRNA1(Val)	0.704247	0.338721	0.970495	0	1	453145	278295	275893	776299	217158	647784
AAR33968.1;ADI83478.2;AJY70388.1;BBA69174.1;BEH09170.1;QVW36897.1;UAC04703.1;UTG94398.1;WP_010941300.1;WP_232008962.1;WP_238525121.1;WP_324309683.1	WP_324309683.1;BEH09170.1;WP_238525121.1;WP_232008962.1;UTG94398.1;UAC04703.1;QVW36897.1;BBA69174.1;WP_010941300.1;AJY70388.1;ADI83478.2;AAR33968.1	DUF721;hypothetical;protein	0.441592	0.553687	0.970495	0	0	373211	460240	338651	253507	425855	912472
AAR33970.1;ADI83480.1;AJY70390.1;BBA69176.1;BEH09172.1;QVW35880.1;UAC04705.1;UTG93334.1;WP_010941302.1	BEH09172.1;UTG93334.1;UAC04705.1;QVW35880.1;BBA69176.1;WP_010941302.1;AJY70390.1;ADI83480.1;AAR33970.1	DUF3343;hypothetical;protein	0.185086	0.459515	0.970495	0	0	913945	773138	1160000	856806	1170000	1210000
AAR33972.1;ADI83481.1;AJY70391.1;BBA69177.1;BEH09173.1;QVW35881.1;UAC04706.1;UTG93335.1;WP_010941303.1;WP_014551370.1;WP_119331851.1	WP_324309686.1;WP_119331851.1;WP_014551370.1;WP_010941303.1;BEH09173.1;UTG93335.1;UAC04706.1;QVW35881.1;BBA69177.1;AJY70391.1;ADI83481.1;AAR33972.1	Signal;signal	0.15467	0.421417	0.970495	0	0	4510000	4370000	5170000	5610000	5830000	4200000
AAR33974.1;ADI83483.1;AJY70393.1;BBA69179.1;BEH09175.1;QVW35883.1;UAC04708.1;UTG93337.1;WP_010941305.1	WP_010941305.1;BEH09175.1;UTG93337.1;UAC04708.1;QVW35883.1;BBA69179.1;AJY70393.1;ADI83483.1;AAR33974.1	KH;MULTISPECIES:;RNA-binding;hypothetical	-0.115477	0.762191	0.985743	0	0	4920000	5070000	2490000	4830000	3270000	3420000
AAR33977.1;ADI83486.1;AJY70395.1;QVW35886.1;UAC04711.1;UTG93340.1;WP_010941308.1	UTG93340.1;UAC04711.1;QVW35886.1;WP_119331853.1;BBA69182.1;WP_010941308.1;AJY70395.1;ADI83486.1;AAR33977.1	RNA;hypothetical;protein	0.607799	0.15131	0.970495	0	0	806333	327613	775983	925310	1120000	865292
AAR33981.1;ADI83490.1;AJY70399.1;QVW35890.1;UAC04715.1;UTG93344.1;WP_010941312.1;WP_254278365.1	WP_119331857.1;WP_286351646.1;WP_010941312.1;WP_254278365.1;BEH09182.1;UTG93344.1;UAC04715.1;QVW35890.1;BBA69186.1;AJY70399.1;ADI83490.1;AAR33981.1	carbon-nitrogen;nitrilase-related;nitrilase/amidohydrolase	0.034661	0.835344	0.991407	0	0	4760000	5160000	6530000	5740000	5940000	5170000
AAR33982.1;ADI83491.1;AJY70400.1;QVW35891.1;UAC04716.1;UTG93345.1;WP_010941313.1	UTG93345.1;UAC04716.1;QVW35891.1;WP_010941313.1;AJY70400.1;ADI83491.1;AAR33982.1	NAD;NAD+	-0.140429	0.616776	0.970495	0	0	3470000	2220000	3690000	2460000	2730000	3320000
AAR33984.1;ADI83493.1;AJY70402.1;BBA69189.1;QVW35893.1;UAC04718.1;UTG93347.1;WP_010941315.1;WP_119331860.1	WP_414973558.1;WP_119331860.1;UTG93347.1;UAC04718.1;QVW35893.1;WP_010941315.1;BBA69189.1;AJY70402.1;ADI83493.1;AAR33984.1	HesA/MoeB/ThiF;Molybdopterin-synthase;adenylyltransferase;molybdopterin-synthase;thiamin	-0.600716	0.433681	0.970495	0	0	1770000	1080000	598950	1270000	251732	752597
AAR33986.1;ADI83495.1;AJY70404.1;CBN62848.1;QVW35895.1;UAC04720.1;UTG93349.1;WP_010941317.1	WP_324312917.1;BEH09187.1;UTG93349.1;UAC04720.1;QVW35895.1;WP_010941317.1;WP_119331862.1;BBA69191.1;AJY70404.1;ADI83495.1;AAR33986.1;CBN62848.1	branched-chain;unnamed	-0.109098	0.70322	0.974322	0	0	31900000	31700000	22900000	34800000	24300000	21100000
AAR33991.1;ADI83500.2;AJY70409.1;BBA69196.1;QVW35900.1;UAC04725.1;UTG93354.1;WP_010941322.1	BEH09192.1;WP_010941322.1;UTG93354.1;UAC04725.1;QVW35900.1;BBA69196.1;AJY70409.1;ADI83500.2;AAR33991.1	Ribose-phosphate;phosphoribosylpyrophosphate;ribose-5-phosphate;ribose-phosphate	-0.156327	0.40824	0.970495	0	0	21600000	21700000	16100000	16400000	19900000	17000000
AAR33994.1;AJY70412.1;BBA69199.1;UAC04728.1;WP_010941325.1	WP_324312904.1;WP_014551375.1;WP_010941325.1;BEH09195.1;UTG93357.1;UAC04728.1;QVW35903.1;BBA69199.1;AJY70412.1;ADI83503.1;AAR33994.1	GTP-binding;GTP-dependent;Ribosome-binding;redox-regulated	0.225081	0.000445716	0.423653	0	0	3910000	3770000	3810000	4560000	4460000	4410000
AAR33997.1;ADI83506.1;AJY70415.1;QVW35906.1;UAC04731.1;UTG93360.1;WP_010941328.1	UTG93360.1;UAC04731.1;QVW35906.1;WP_010941328.1;AJY70415.1;ADI83506.1;AAR33997.1	YybS;membrane	0.00588353	0.983979	1	0	0	1110000	868347	619734	869636	1010000	729062
AAR34000.2;ADI83508.1;BBA69204.1;BEH09200.1;QVW35908.1;UAC04733.1;UTG93362.1;WP_010941330.1;WP_119331864.1	BEH09200.1;UTG93362.1;UAC04733.1;QVW35908.1;WP_119331864.1;BBA69204.1;WP_010941330.1;AAR34000.2;ADI83508.1	C-type;cytochrome;lipoprotein	0.463825	0.195712	0.970495	0	0	10200000	8150000	5200000	13300000	9770000	9410000
AAR34001.1;ADI83509.1;AJY70418.1;QVW35909.1;UAC04734.1;UTG93363.1;WP_010941331.1	WP_286351664.1;BEH09201.1;WP_010941331.1;UTG93363.1;UAC04734.1;QVW35909.1;AJY70418.1;ADI83509.1;AAR34001.1	RNA;RluA;pseudouridine	0.319493	0.266541	0.970495	0	0	594266	936250	1070000	965162	1170000	1110000
AAR34009.1;ADI83516.1;AJY70426.1;CBF75418.1;CBU97120.1;QVW35917.1;UAC04742.1;UTG93371.1;WP_010941339.1;WP_014551378.1;WP_324312895.1	WP_324312895.1;WP_286351671.1;WP_119331873.1;WP_014551378.1;WP_010941339.1;BEH09209.1;UTG93371.1;UAC04742.1;QVW35917.1;BBA69213.1;AJY70426.1;ADI83516.1;AAR34009.1;CBU97120.1;CBF75418.1	SAM-dependent;class;methyltransferase;unnamed	0.720657	0.287714	0.970495	0	0	495110	133904	159515	488618	507255	303569
AAR34010.1;ADI83517.1;AJY70427.1;QVW35918.1;UAC04743.1;UTG93372.1;WP_010941340.1	WP_119331875.1;WP_286351672.1;WP_324312894.1;BEH09210.1;WP_010941340.1;UTG93372.1;UAC04743.1;QVW35918.1;BBA69214.1;AJY70427.1;ADI83517.1;AAR34010.1	DUF748;flagellar	-0.142311	0.560558	0.970495	0	0	1920000	1370000	1820000	1170000	1750000	1710000
AAR34017.1;ADI83524.1;AJY70434.1;BBA69222.1;BEH09217.1;QVW35943.1;UAC04749.1;UTG93379.1;WP_010941347.1;WP_119331883.1	WP_119331883.1;WP_010941347.1;BEH09217.1;UTG93379.1;UAC04749.1;QVW35943.1;BBA69222.1;AJY70434.1;ADI83524.1;AAR34017.1	N-acetyl-alpha-D-glucosaminyl-diphospho-ditrans;NAD-dependent;hopanoid-associated	-0.418059	0.101911	0.970495	0	0	1020000	744592	912110	531301	745745	726281
AAR34018.1;ADI83525.1;AJY70435.1;BBA69223.1;CBG17638.1;CBG17730.1;CBV30992.1;CBV31085.1;QVW35944.1;UAC04750.1;UTG93380.1;WP_010941348.1;WP_119331884.1	WP_119331884.1;WP_010941348.1;BEH09218.1;UTG93380.1;UAC04750.1;QVW35944.1;BBA69223.1;AJY70435.1;ADI83525.1;AAR34018.1;CBV31085.1;CBV30992.1;CBG17730.1;CBG17638.1	Squalene--hopene;squalene;squalene--hopene;unnamed	0.435802	0.134053	0.970495	0	0	3380000	2380000	2690000	3330000	3450000	4650000
AAR34019.1;ADI83526.1;AJY70436.1;QVW35945.1;UAC04751.1;UTG93381.1;WP_010941349.1	WP_010941349.1;WP_119331885.1;UTG93381.1;UAC04751.1;QVW35945.1;BBA69224.1;AJY70436.1;ADI83526.1;AAR34019.1	MMPL;efflux;transporter	-0.393461	0.128055	0.970495	0	0	5480000	7180000	5480000	4720000	3700000	5390000
AAR34028.2;ADI83537.1;AJY70446.1;BBA69234.1;QVW35954.1;UAC04760.1;UTG93391.1;WP_010941359.1;WP_014551385.1;WP_119331895.1	WP_119331895.1;WP_014551385.1;WP_010941359.1;UTG93391.1;UAC04760.1;QVW35954.1;BBA69234.1;AJY70446.1;AAR34028.2;ADI83537.1	HEAT;HEAT-like;PBS;hypothetical	-0.359286	0.486595	0.970495	0	0	980860	429439	563143	423604	461138	653655
AAR34044.1;ADI83554.1;AJY70461.1;QVW35970.1;UAC04775.1;UTG93406.1;WP_010941375.1;WP_254278375.1	WP_254278375.1;UTG93406.1;UAC04775.1;QVW35970.1;AJY70461.1;ADI83554.1;AAR34044.1;WP_010941375.1	hypothetical	0.00535548	0.995952	1	0	0	2080000	2710000	601186	1140000	411236	3860000
AAR34045.1;ADI83555.1;AJY70462.1;BBA69251.1;BEH11286.1;QVW35971.1;UAC04776.1;UTG93407.1;WP_010941376.1;WP_119331904.1	BEH11286.1;UTG93407.1;UAC04776.1;QVW35971.1;WP_119331904.1;BBA69251.1;WP_010941376.1;AJY70462.1;ADI83555.1;AAR34045.1	amidase;hypothetical	0.171791	0.733512	0.980445	1	0	490213	620299	899464	608229	1140000	515921
AAR34046.1;ADI83556.1;AJY70463.1;QVW35972.1;UAC04777.1;UTG93408.1;WP_010941377.1	WP_010941377.1;pdb|3BIJ|C;pdb|3BIJ|B;pdb|3BIJ|A;WP_286350511.1;BEH11285.1;WP_119331905.1;UTG93408.1;UAC04777.1;QVW35972.1;BBA69252.1;AJY70463.1;ADI83556.1;AAR34046.1	caspase;peptidase;peptidase,	-0.3229	0.532775	0.970495	0	0	22400000	9130000	13000000	11100000	13900000	10600000
AAR34048.1;ADI83559.1;AJY70465.1;BBA69254.1;BEH11283.1;QVW35974.1;UAC04779.1;UTG93410.1;WP_010941379.1;WP_119331906.1;WP_286350510.1;WP_324311826.1	WP_324311826.1;WP_286350510.1;WP_119331906.1;WP_010941379.1;BEH11283.1;UTG93410.1;UAC04779.1;QVW35974.1;BBA69254.1;AJY70465.1;ADI83559.1;AAR34048.1	PAS;Signal;histidine;response;sensor	-0.471305	0.466786	0.970495	1	0	1220000	946745	537052	394409	425872	1130000
AAR34050.1;ADI83561.1;AJY70467.1;BBA69256.1;BEH11281.1;QVW35976.1;UAC04781.1;UTG93412.1;WP_119331908.1	BEH11281.1;WP_119331908.1;UTG93412.1;UAC04781.1;QVW35976.1;BBA69256.1;AJY70467.1;ADI83561.1;AAR34050.1	Desulfoferrodoxin;class;desulfoferrodoxin;desulfoferrodoxin,	0.0468956	0.85904	0.99333	0	0	1810000	1700000	1030000	1510000	1490000	1690000
AAR34051.1;ADI83562.2;AJY71943.1;BBA69257.1;BEH11280.1;QVW35977.1;UAC04782.1;UTG93413.1;WP_010941382.1;WP_119331909.1;WP_214302950.1;WP_286350508.1;WP_324311823.1	WP_324311823.1;WP_286350508.1;BEH11280.1;UTG93413.1;UAC04782.1;WP_214302950.1;QVW35977.1;WP_010941382.1;WP_119331909.1;BBA69257.1;AJY71943.1;ADI83562.2;AAR34051.1	ECF;RNA	0.238324	0.741016	0.981652	0	0	1010000	2500000	474328	1220000	2000000	1480000
AAR34058.1;ADI83571.1;AJY70475.1;BBA69265.1;QVW35984.1;UAC04789.1;UTG93420.1;WP_010941390.1;WP_119331916.1	WP_119331916.1;WP_010941390.1;UTG93420.1;UAC04789.1;QVW35984.1;BBA69265.1;AJY70475.1;ADI83571.1;AAR34058.1	hypothetical;polyphosphate;polyphosphate-dependent;polyphosphate:AMP	-0.303646	0.0365058	0.948398	0	0	558437	539066	482763	381952	458339	440044
AAR34061.1;ADI83573.1;AJY70477.1;QVW35986.1;UAC04791.1;UTG93422.1;WP_010941392.1	WP_119331918.1;WP_010941392.1;BEH11271.1;UTG93422.1;UAC04791.1;QVW35986.1;BBA69267.1;AJY70477.1;ADI83573.1;AAR34061.1	UDP-3-O-(3-hydroxyacyl)-N-acetylglucosamine/UDP-3-N-(3-hydroxyacyl)-2-N-acetylglucosediamine;UDP-3-O-(3-hydroxymyristoyl);UDP-3-O-acyl-N-acetylglucosamine	-0.432586	0.460199	0.970495	0	0	3410000	4610000	4030000	4790000	3250000	888235
AAR34062.1;ADI83574.2;AJY70478.1;BBA69268.1;QVW35987.1;UAC04792.1;UTG93423.1;WP_010941393.1	BEH11270.1;UTG93423.1;UAC04792.1;QVW35987.1;WP_010941393.1;BBA69268.1;AJY70478.1;ADI83574.2;AAR34062.1	GreA/GreB;RNA;Regulator;nucleoside	-0.0668227	0.686427	0.973029	0	0	27300000	20200000	23200000	24800000	22300000	20400000
AAR34065.1;ADI83577.1;AJY70481.1;BBA69271.1;BEH11267.1;QVW35990.1;UAC04795.1;UTG93426.1;WP_010941396.1;WP_286350495.1;WP_324311807.1	WP_324311807.1;WP_010941396.1;WP_286350495.1;BEH11267.1;UTG93426.1;UAC04795.1;QVW35990.1;BBA69271.1;AJY70481.1;ADI83577.1;AAR34065.1	Nitrogen;PTS;helix-turn-helix	0.962838	0.308981	0.970495	0	0	1780000	366990	426860	1690000	2570000	756796
AAR34066.1;ADI83578.1;AJY70482.1;QVW35991.1;UAC04796.1;UTG93427.1;WP_010941397.1;WP_254278377.1	WP_254278377.1;WP_010941397.1;UTG93427.1;UAC04796.1;QVW35991.1;AJY70482.1;ADI83578.1;AAR34066.1	toxin,;type	0.154723	0.667873	0.97248	0	0	1360000	1780000	1100000	1550000	1100000	2070000
AAR34069.1;ADI83580.1;BEH11264.1;CAV22066.1;QVW35993.1;UAC04798.1;UTG93429.1;WP_010941399.1;WP_014551400.1;WP_286350492.1;WP_324311805.1	WP_119331922.1;WP_324311805.1;WP_014551400.1;WP_010941399.1;WP_286350492.1;BEH11264.1;UTG93429.1;UAC04798.1;QVW35993.1;BBA69274.1;AJY70484.1;ADI83580.1;AAR34069.1;CAV22066.1	Ech-hydrogenase-related;hydrogenase;proton-conducting;unnamed	0.0160837	0.975977	1	0	0	1560000	1630000	1270000	1020000	1020000	2470000
AAR34070.1;ADI83581.1;BEH11263.1;QVW35994.1;UAC04799.1;UTG93430.1;WP_010941400.1;WP_014551401.1;WP_214302952.1;WP_286350491.1	WP_286350491.1;WP_214302952.1;WP_014551401.1;WP_010941400.1;BEH11263.1;UTG93430.1;UAC04799.1;QVW35994.1;ADI83581.1;AAR34070.1	Ech-hydrogenase-related;NADH-quinone;respiratory	0.0159255	0.936234	1	0	0	2600000	3950000	3360000	3100000	3330000	3590000
AAR34071.1;ADI83582.1;AJY70486.1;BBA69276.1;BEH11262.1;QVW35995.1;UAC04800.1;UTG93431.1	BEH11262.1;UTG93431.1;UAC04800.1;QVW35995.1;BBA69276.1;AJY70486.1;ADI83582.1;AAR34071.1	Ech-hydrogenase-related;Hydrogenase-4;hydrogenase	-0.0218929	0.967261	1	0	1	852994	575710	236950	618432	536854	485283
AAR34072.1;ADI83583.1;AJY70487.1;BBA69277.1;BEH11261.1;QVW35996.1;UAC04801.1;UTG93432.1;WP_010941402.1;WP_014551402.1;WP_119331923.1;WP_286350489.1;WP_324311801.1	WP_324311801.1;WP_014551402.1;WP_119331923.1;WP_286350489.1;WP_010941402.1;BEH11261.1;UTG93432.1;UAC04801.1;QVW35996.1;BBA69277.1;AJY70487.1;ADI83583.1;AAR34072.1	Ech-hydrogenase-related;Hydrogenase-4;MULTISPECIES:;hydrogenase;proton-conducting	0.786172	0.274567	0.970495	0	0	330626	586048	592592	642343	1360000	600375
AAR34073.1;ADI83584.1;AJY70488.1;BBA69278.1;QVW35997.1;UAC04802.1;UTG93433.1;WP_010941403.1;WP_014551403.1;WP_045668011.1;WP_214302953.1	WP_324311799.1;WP_045668011.1;WP_010941403.1;BEH11260.1;UTG93433.1;UAC04802.1;WP_214302953.1;QVW35997.1;BBA69278.1;WP_014551403.1;AJY70488.1;ADI83584.1;AAR34073.1	Ech-hydrogenase-related;Formate;NADH-quinone;hydrogenase	0.395385	0.264276	0.970495	0	0	1200000	1770000	1280000	1500000	2420000	1670000
AAR34075.2;ADI83585.1;AJY70489.1;BBA69279.1;BEH11259.1;QVW35998.1;UAC04803.1;UTG93434.1;WP_010941404.1;WP_014551404.1;WP_045668012.1;WP_214302954.1;WP_324311797.1	WP_324311797.1;BEH11259.1;UTG93434.1;UAC04803.1;WP_214302954.1;QVW35998.1;BBA69279.1;WP_014551404.1;WP_045668012.1;AJY70489.1;AAR34075.2;ADI83585.1;WP_010941404.1	Ech-hydrogenase-related;Formate;hydrogenase	0.21152	0.635396	0.970495	0	0	1370000	718110	788609	1430000	1190000	710975
AAR34077.1;ADI83587.1;AJY70491.1;BBA69281.1;BEH11257.1;QVW36000.1;UAC04805.1;UTG93436.1;WP_010941406.1;WP_045668014.1	BEH11257.1;UTG93436.1;UAC04805.1;QVW36000.1;WP_045668014.1;WP_010941406.1;BBA69281.1;AJY70491.1;ADI83587.1;AAR34077.1	YdeI/OmpD-associated;hypothetical	-0.904078	0.297838	0.970495	1	1	453720	277794	123164	124055	145592	187071
AAR34081.1;ADI83590.1;AJY70494.1;UAC04808.1;UTG93439.1;WP_010941409.1	WP_286350480.1;WP_119331925.1;WP_010941409.1;BEH11251.1;UTG93439.1;UAC04808.1;BBA69285.1;AJY70494.1;ADI83590.1;AAR34081.1	DUF2284;metal-binding;protein	0.268176	0.439088	0.970495	0	0	537018	577426	869605	773271	1010000	606088
AAR34097.1;ADI83608.1;AJY70509.1;BBA69306.1;BEH11230.1;QVW36018.1;UAC04833.1;UTG93459.1;WP_010941429.1;WP_014551414.1;WP_119331939.1;WP_214302965.1;WP_286350460.1	WP_214302965.1;WP_119331939.1;WP_014551414.1;WP_010941429.1;WP_286350460.1;BEH11230.1;UTG93459.1;UAC04833.1;QVW36018.1;BBA69306.1;AJY70509.1;ADI83608.1;AAR34097.1	MULTISPECIES:;Outer;outer;porin	-0.00313371	0.990572	1	0	0	1080000	643689	994575	789270	873096	1050000
AAR34100.1;ADI83613.1;AJY70513.1;BBA69311.1;BEH11225.1;QVW36022.1;UAC04837.1;UTG93463.1;WP_010941434.1;WP_014551416.1;WP_119331941.1;WP_286350455.1;WP_324311758.1	WP_324311758.1;WP_286350455.1;BEH11225.1;WP_119331941.1;WP_014551416.1;WP_010941434.1;UTG93463.1;UAC04837.1;QVW36022.1;BBA69311.1;AJY70513.1;ADI83613.1;AAR34100.1	TetR;TetR/AcrR;Transcriptional;transcriptional	-0.158755	0.694529	0.973443	0	0	676538	378569	885442	598274	621032	519033
AAR34101.1;AJY70514.1;BBA69312.1;BEH11224.1;QVW36023.1;UAC04838.1;WP_010941435.1;WP_286350454.1;WP_324311756.1	WP_324311756.1;WP_286350454.1;BEH11224.1;WP_254278392.1;UTG93464.1;UAC04838.1;QVW36023.1;WP_014551417.1;WP_010941435.1;BBA69312.1;AJY70514.1;ADI83614.1;AAR34101.1	NADPH:quinone;Putative;oxidoreductase;quinone	-0.0458644	0.843447	0.991407	0	0	2870000	2650000	2150000	2000000	2370000	3060000
AAR34102.1;ADI83615.1;QVW36024.1;UAC04839.1;UTG93465.1;WP_010941436.1	WP_010941436.1;WP_286350453.1;BEH11223.1;WP_119331942.1;UTG93465.1;UAC04839.1;QVW36024.1;BBA69313.1;AJY70515.1;ADI83615.1;AAR34102.1	flavodoxin;flavodoxin,	0.131706	0.622385	0.970495	0	0	2680000	1710000	2410000	2460000	2990000	2000000
AAR34105.1;ADI83618.1;QVW36027.1;UAC04842.1;UTG93468.1;WP_010941439.1;WP_254278393.1	WP_010941439.1;WP_324311750.1;WP_254278393.1;UTG93468.1;UAC04842.1;QVW36027.1;ADI83618.1;AAR34105.1	cache;sensor	-0.0481991	0.811204	0.991407	0	0	2220000	2130000	2650000	1880000	2160000	2730000
AAR34106.1;ADI83619.1;BEH11219.1;CBF90721.1;CBG02322.1;CBV04241.1;CBV15842.1;QVW36899.1;UAC05770.1;UTG94401.1;WP_010941440.1;WP_286352532.1	WP_286352532.1;WP_119331945.1;BEH11219.1;WP_010941440.1;UTG94401.1;UAC05770.1;QVW36899.1;BBA69317.1;AJY70519.1;ADI83619.1;AAR34106.1;CBV15842.1;CBV04241.1;CBG02322.1;CBF90721.1	MULTISPECIES:;sigma-54;sigma-54-dependent;unnamed	-0.0108532	0.954965	1	0	0	2490000	3730000	3120000	3000000	2980000	3290000
AAR34107.1;ADI83620.2;QVW36028.1;UAC04843.1;UTG93469.1;WP_010941441.1	WP_082208857.1;WP_010941441.1;BEH11218.1;UTG93469.1;UAC04843.1;QVW36028.1;BBA69319.1;AJY70521.1;ADI83620.2;AAR34107.1	formate;periplasmically	1.79405	0.0213268	0.948398	0	0	3450000	4620000	4070000	14600000	16500000	11000000
AAR34108.1;ADI83621.1;AJY70522.1;BBA69320.1;BEH11217.1;CBG19745.1;CBV33100.1;QVW36029.1;UAC04844.1;UTG93470.1	BEH11217.1;UTG93470.1;UAC04844.1;QVW36029.1;BBA69320.1;AJY70522.1;ADI83621.1;AAR34108.1;CBV33100.1;CBG19745.1	4Fe-4S;Formate;formate;periplasmically;unnamed	1.73243	0.0027573	0.692576	0	0	6000000	7490000	12000000	24000000	29100000	31600000
AAR34109.1;ADI83622.1;AJY70523.1;BBA69321.1;QVW36030.1;UAC04845.1;UTG93471.1;WP_010941443.1;WP_045668041.1	WP_010941443.1;WP_066357839.1;WP_045668041.1;BEH11216.1;UTG93471.1;UAC04845.1;QVW36030.1;BBA69321.1;AJY70523.1;ADI83622.1;AAR34109.1	Ni/Fe-hydrogenase;NrfD/PsrC;formate;periplasmically;putative	1.39864	0.00421982	0.694151	0	0	1170000	2010000	2460000	4550000	4640000	5680000
AAR34112.1;ADI83625.1;AJY70526.1;BBA69325.1;BEH11213.1;QVW36033.1;UAC04848.1;UTG93474.1;WP_010941447.1	BEH11213.1;UTG93474.1;UAC04848.1;QVW36033.1;WP_010941447.1;BBA69325.1;AJY70526.1;ADI83625.1;AAR34112.1	Hydrogenase-2;Ni/Fe;hydrogenase;periplasmically	-0.0137532	0.964995	1	0	0	22200000	40900000	42300000	33700000	39300000	31400000
AAR34113.1;ADI83626.2;AJY70527.1;BBA69326.1;CBG19746.1;CBV33101.1;QVW36034.1;UAC04849.1;UTG93475.1;WP_010941448.1;WP_119331948.1	WP_324311743.1;WP_119331948.1;WP_010941448.1;BEH11212.1;UTG93475.1;UAC04849.1;QVW36034.1;BBA69326.1;AJY70527.1;ADI83626.2;AAR34113.1;CBV33101.1;CBG19746.1	Formate;hydrogenase;periplasmically;unnamed	0.333485	0.187179	0.970495	0	0	2920000	4400000	3870000	3910000	4800000	5390000
AAR34114.1;ADI83627.1;AJY70528.1;QVW36035.1;UAC04850.1;UTG93476.1;WP_010941449.1	WP_119331949.1;WP_010941449.1;BEH11211.1;UTG93476.1;UAC04850.1;QVW36035.1;BBA69327.1;AJY70528.1;ADI83627.1;AAR34114.1	Ni/Fe-hydrogenase;hydrogenase;periplasmically	0.238623	0.533359	0.970495	0	0	1770000	3230000	2450000	3400000	1930000	3460000
AAR34115.1;ADI83628.2;QVW36036.1;UAC04851.1;UTG93477.1;WP_010941450.1	BEH11210.1;UTG93477.1;UAC04851.1;QVW36036.1;WP_010941450.1;AJY70529.1;ADI83628.2;AAR34115.1	nickel-dependent;periplasmically	0.0800221	0.54434	0.970495	0	0	14900000	19200000	18500000	17400000	19100000	19100000
AAR34116.1;ADI83629.1;AJY70530.1;BBA69329.1;BEH11209.1;QVW36037.1;UAC04852.1;UTG93478.1	WP_324311740.1;BEH11209.1;UTG93478.1;UAC04852.1;QVW36037.1;BBA69329.1;AJY70530.1;ADI83629.1;AAR34116.1	HyaD/HybD;Hydrogenase;membrane;periplasmically	-0.0836984	0.782747	0.988936	0	0	4900000	8960000	7430000	6670000	5680000	7740000
AAR34119.1;ADI83632.1;AJY70533.1;BBA69332.1;BEH11206.1;QVW36900.1;UAC05771.1;UTG94402.1;WP_232008971.1;WP_286350442.1	WP_232008971.1;WP_286350442.1;BEH11206.1;UTG94402.1;UAC05771.1;QVW36900.1;BBA69332.1;AJY70533.1;ADI83632.1;AAR34119.1	MULTISPECIES:;Nitrogen;chemotaxis;response	0.292329	0.389454	0.970495	1	0	452250	353147	366216	591954	325507	517314
AAR34120.1;ADI83633.2;AJY70534.1;UAC04855.1;UTG93481.1;WP_010941455.1;WP_014551418.1	UTG93481.1;WP_214302966.1;UAC04855.1;QVW36040.1;WP_119331952.1;BBA69333.1;WP_014551418.1;WP_010941455.1;AJY70534.1;ADI83633.2;AAR34120.1	DUF2860;hypothetical;protein	-0.398973	0.391192	0.970495	0	0	1070000	688033	544821	471057	477978	797445
AAR34123.1;ADI83636.1;AJY70537.1;BEH11203.1;QVW36043.1;UAC04858.1;UTG93484.1;WP_010941458.1;WP_014551420.1;WP_286350439.1;WP_324311732.1	WP_324311732.1;WP_014551420.1;WP_286350439.1;WP_010941458.1;BEH11203.1;UTG93484.1;UAC04858.1;QVW36043.1;AJY70537.1;ADI83636.1;AAR34123.1	MULTISPECIES:;NosL;nitrous	-0.628016	0.16472	0.970495	1	0	161532	88306	133630	110994	63370	73765
AAR34124.2;ADI83637.1;UAC04859.1;UTG93485.1;WP_010941459.1	WP_324311730.1;WP_045668045.1;WP_286350438.1;WP_010941459.1;WP_119331956.1;BEH11202.1;UTG93485.1;UAC04859.1;QVW36044.1;BBA69337.1;AJY70538.1;AAR34124.2;ADI83637.1	FAD-dependent	-0.232071	0.610386	0.970495	0	0	1960000	1650000	3120000	1270000	2660000	1800000
AAR34128.1;ADI83641.1;AJY70541.1;BBA69341.1;QVW36901.1;UAC05772.1;UTG94403.1;WP_010941464.1	WP_010941464.1;WP_286350434.1;WP_324311714.1;BEH11198.1;UTG94403.1;UAC05772.1;QVW36901.1;BBA69341.1;AJY70541.1;ADI83641.1;AAR34128.1	Glutamine;amino;arginine	0.0607845	0.639577	0.972164	0	0	1850000	1600000	1430000	1790000	1600000	1700000
AAR34129.2;ADI83642.1;QVW36048.1;UAC04863.1;UTG93489.1;WP_010941465.1;WP_014551422.1	WP_014551422.1;WP_010941465.1;WP_119331960.1;WP_286350433.1;BEH11197.1;UTG93489.1;UAC04863.1;QVW36048.1;BBA69342.1;AJY70542.1;AAR34129.2;ADI83642.1;CBV12592.1;CBF99072.1	ABC;amino	0.0202465	0.935102	1	0	0	771319	451386	613736	581126	618538	662731
AAR34130.2;ADI83643.1;AJY70543.1;BBA69343.1;BEH11196.1;QVW36049.1;UAC04864.1;UTG93490.1;WP_119331961.1	BEH11196.1;UTG93490.1;UAC04864.1;QVW36049.1;WP_119331961.1;BBA69343.1;AJY70543.1;ADI83643.1;AAR34130.2	L-cystine-binding;amino	-0.00504439	0.974751	1	0	0	22200000	18800000	16300000	20700000	18900000	17500000
AAR34133.1;ADI83646.1;AJY70546.1;BBA69346.1;BEH11194.1;QVW36052.1;UAC04867.1;UTG93493.1;WP_010941469.1;WP_119331964.1;WP_286350431.1	WP_286350431.1;BEH11194.1;UTG93493.1;UAC04867.1;QVW36052.1;WP_119331964.1;WP_010941469.1;BBA69346.1;AJY70546.1;ADI83646.1;AAR34133.1	Phosphoenolpyruvate;phosphoenolpyruvate	-0.842431	0.215441	0.970495	0	0	752637	1750000	1980000	554054	785926	1160000
AAR34138.1;ADI83651.1;AJY70551.1;QVW36057.1;UAC04872.1;UTG93498.1;WP_010941474.1;WP_324311704.1	WP_324311704.1;BEH11190.1;UTG93498.1;UAC04872.1;WP_010941474.1;QVW36057.1;AJY70551.1;ADI83651.1;AAR34138.1	GGDEF;diguanylate	0.187295	0.46936	0.970495	0	0	3040000	2560000	1830000	3260000	2750000	2450000
AAR34139.2;ADI83652.1;AJY70552.1;BBA69352.1;BEH11189.1;QVW36058.1;UAC04873.1;UTG93499.1;WP_010941475.1	WP_010941475.1;BEH11189.1;UTG93499.1;UAC04873.1;QVW36058.1;BBA69352.1;AJY70552.1;AAR34139.2;ADI83652.1	Beta-carbonic;MULTISPECIES:;carbonic	0.386217	0.560771	0.970495	0	0	4320000	3740000	4580000	4380000	2990000	9150000
AAR34140.1;ADI83653.1;AJY70553.1;QVW36059.1;UAC04874.1;UTG93500.1;WP_010941476.1;WP_324311700.1	WP_286350425.1;WP_010941476.1;WP_119331970.1;WP_324311700.1;BEH11188.1;UTG93500.1;UAC04874.1;QVW36059.1;BBA69353.1;AJY70553.1;ADI83653.1;AAR34140.1	OmpA;membrane;peptidoglycan-binding	-0.156777	0.669214	0.97248	0	0	2020000	1380000	1090000	977650	1470000	1580000
AAR34141.1;ADI83654.1;AJY70554.1;CBF90722.1;CBG02323.1;CBV04242.1;CBV15843.1;QVW36060.1;UAC04875.1;UTG93501.1;WP_010941477.1	WP_119331971.1;WP_010941477.1;UTG93501.1;UAC04875.1;QVW36060.1;BBA69354.1;AJY70554.1;ADI83654.1;AAR34141.1;CBV15843.1;CBV04242.1;CBG02323.1;CBF90722.1	Fis;sigma-54;sigma-54-dependent;unnamed	-0.127454	0.514159	0.970495	0	0	3030000	2920000	2920000	3340000	2350000	2430000
AAR34142.1;ADI83655.1;QVW36061.1;UAC04876.1;UTG93502.1;WP_010941478.1	WP_286350423.1;WP_119331972.1;WP_010941478.1;BEH11186.1;UTG93502.1;UAC04876.1;QVW36061.1;BBA69355.1;AJY70555.1;ADI83655.1;AAR34142.1	HAMP;sensor	0.164336	0.629689	0.970495	0	0	862851	704766	551200	1060000	656755	657698
AAR34143.1;ADI83656.1;AJY70556.1;QVW36062.1;UAC04877.1;UTG93503.1;WP_010941479.1	WP_010941479.1;WP_119331973.1;UTG93503.1;UAC04877.1;QVW36062.1;BBA69356.1;AJY70556.1;ADI83656.1;AAR34143.1	ABC;MlaC/ttg2D;organic	0	1	1	0	0	3490000	3360000	3190000	2770000	3650000	3620000
AAR34144.1;ADI83657.1;UAC04878.1;UTG93504.1;WP_010941480.1	WP_119331974.1;WP_010941480.1;WP_286350421.1;BEH11184.1;WP_214302971.1;UTG93504.1;UAC04878.1;QVW36063.1;BBA69357.1;AJY70557.1;ADI83657.1;AAR34144.1	TolC;efflux	-0.455014	0.0702896	0.970495	0	0	11800000	12400000	9220000	7030000	9050000	8300000
AAR34145.1;ADI83658.1;UAC04879.1;UTG93505.1;WP_010941481.1	BEH11183.1;UTG93505.1;UAC04879.1;QVW36064.1;WP_119331975.1;WP_010941481.1;BBA69358.1;AJY70558.1;ADI83658.1;AAR34145.1	ABC;outer	-0.0518545	0.83122	0.991407	0	0	3760000	4600000	2970000	3040000	3660000	4230000
AAR34146.1;ADI83659.1;BBA69359.1;UAC04880.1;UTG93506.1;WP_010941482.1	WP_010941482.1;UTG93506.1;UAC04880.1;BBA69359.1;ADI83659.1;AAR34146.1	ABC;organic;putative	-0.11873	0.636177	0.970605	0	0	1530000	1430000	1850000	1130000	1850000	1450000
AAR34147.1;ADI83660.1;AJY70560.1;BBA69360.1;BEH11181.1;QVW36066.1;UAC04881.1;UTG93507.1;WP_010941483.1;WP_045668052.1;WP_394371623.1	WP_394371623.1;WP_045668052.1;WP_010941483.1;BEH11181.1;UTG93507.1;UAC04881.1;QVW36066.1;BBA69360.1;AJY70560.1;ADI83660.1;AAR34147.1	ABC;MULTISPECIES:;MlaE;putative	-0.127791	0.724704	0.975743	0	1	558705	346897	661075	619517	398383	415972
AAR34148.1;ADI83661.1;AJY70561.1;QVW36067.1;UAC04882.1;UTG93508.1;WP_010941484.1	UTG93508.1;UAC04882.1;QVW36067.1;WP_010941484.1;WP_119331976.1;BBA69361.1;AJY70561.1;ADI83661.1;AAR34148.1	NADP-dependent;aldehyde	-0.121059	0.669393	0.97248	0	0	1240000	1190000	1670000	1120000	1030000	1620000
AAR34150.1;ADI83664.1;AJY70564.1;BBA69364.1;BEH11177.1;QVW36069.1;UAC04884.1;UTG93510.1;WP_010941487.1;WP_119334037.1;WP_214302972.1	BEH11177.1;UTG93510.1;UAC04884.1;WP_214302972.1;QVW36069.1;WP_119334037.1;WP_010941487.1;BBA69364.1;AJY70564.1;ADI83664.1;AAR34150.1	Putative;signal	-0.334839	0.413929	0.970495	0	0	907212	522191	1100000	578343	699191	727960
AAR34153.1;BBA69367.1;BEH11174.1;UAC04887.1;WP_010941490.1;WP_066357818.1	WP_014551427.1;WP_066357818.1;WP_010941490.1;BEH11174.1;UTG93513.1;UAC04887.1;QVW36072.1;BBA69367.1;AJY70567.1;ADI83667.1;AAR34153.1	MULTISPECIES:;Peptidyl-prolyl;peptidylprolyl	-0.335059	0.384269	0.970495	0	0	3830000	2860000	2140000	2850000	2560000	1590000
AAR34154.1;ADI83668.1;AJY70568.1;BBA69368.1;BEH11173.1;QVW36073.1;UAC04888.1;UTG93514.1;WP_010941491.1	BEH11173.1;UTG93514.1;UAC04888.1;QVW36073.1;BBA69368.1;WP_010941491.1;AJY70568.1;ADI83668.1;AAR34154.1	SseB;hypothetical	0.091051	0.877323	0.995781	0	0	2490000	1250000	719483	1440000	2030000	1280000
AAR34155.1;ADI83669.1;AJY70569.1;BBA69369.1;QVW36074.1;UAC04889.1;UTG93515.1;WP_010941492.1;WP_014551428.1;WP_119331980.1;WP_254278395.1	WP_254278395.1;WP_014551428.1;WP_010941492.1;WP_286350412.1;BEH11172.1;UTG93515.1;UAC04889.1;QVW36074.1;WP_119331980.1;BBA69369.1;AJY70569.1;ADI83669.1;AAR34155.1	Quercetin;pirin	0.0305573	0.795816	0.990681	0	0	789445	904998	862894	915079	936836	760166
AAR34159.1;BBA69374.1;UAC05774.1;WP_010941496.1	WP_014551430.1;WP_010941496.1;BEH11168.1;UAC05774.1;BBA69374.1;AJY69645.1;ADI83674.1;AAR34159.1	Cobalt-zinc-cadmium;efflux	-0.0664693	0.818304	0.991407	0	0	1150000	895402	1520000	1130000	1340000	934860
AAR34162.1;BBA69377.1;UAC04895.1;WP_010941499.1	UAC04895.1;BBA69377.1;WP_010941499.1;AAR34162.1	hypothetical;lipoprotein;lipoprotein,	-0.649864	0.392698	0.970495	0	0	2200000	839001	1250000	717503	406050	1610000
AAR34171.1;BBA69383.1;UAC04901.1;WP_010941505.1;WP_119331984.1	WP_119331984.1;WP_286350401.1;BEH11159.1;WP_014551437.1;WP_010941505.1;UTG93528.1;UAC04901.1;QVW36087.1;BBA69383.1;AJY70582.1;ADI83683.1;AAR34171.1	Transcriptional;sigma-54;sigma-54-dependent	-0.253101	0.28802	0.970495	0	0	1530000	1060000	1200000	1210000	1010000	960154
AAR34172.2;ADI83684.2;AJY71948.1;BBA69384.1;BEH11158.1;QVW36088.1;UAC04902.1;UTG93529.1;WP_010941506.1;WP_014551438.1;WP_119331985.1;WP_214302976.1;WP_286350400.1;WP_324311671.1	WP_324311671.1;WP_286350400.1;WP_014551438.1;WP_010941506.1;WP_119331985.1;WP_214302976.1;BEH11158.1;UTG93529.1;UAC04902.1;QVW36088.1;BBA69384.1;AJY71948.1;AAR34172.2;ADI83684.2	ATP-binding;Blue-light-activated;MULTISPECIES:;histidine;response;sensor	-0.160454	0.713406	0.974322	0	0	253156	139350	118436	169178	151750	136234
AAR34173.1;ADI83685.1;AJY70583.1;QVW36089.1;UAC04903.1;UTG93530.1;WP_010941507.1	WP_324311669.1;WP_286350399.1;WP_010941507.1;BEH11157.1;UTG93530.1;UAC04903.1;QVW36089.1;AJY70583.1;ADI83685.1;AAR34173.1	FAD-dependent;NADH;rubredoxin	0.00698166	0.983379	1	0	0	1900000	980255	1190000	1350000	1300000	1440000
AAR34176.1;ADI83688.1;AJY70586.1;QVW36092.1;UAC04906.1;UTG93533.1;WP_010941510.1;WP_254278399.1	WP_324311663.1;WP_286350396.1;BEH11154.1;WP_254278399.1;UTG93533.1;UAC04906.1;QVW36092.1;WP_010941510.1;AJY70586.1;ADI83688.1;AAR34176.1	aconitate	-0.0557956	0.546156	0.970495	0	0	2310000	2040000	2240000	1920000	2200000	2220000
AAR34179.1;ADI83691.1;AJY70589.1;CAY36280.1;QVW36095.1;UAC05775.1;UTG94405.1;WP_010941513.1;WP_254278568.1	WP_254278568.1;UTG94405.1;UAC05775.1;QVW36095.1;WP_010941513.1;AJY70589.1;ADI83691.1;AAR34179.1;CAY36280.1	iron-sulfur;unnamed	0.0191088	0.893717	0.995781	0	0	1460000	1410000	1630000	1470000	1340000	1750000
AAR34180.1;ADI83692.1;AJY70590.1;QVW36096.1;UAC04909.1;UTG93536.1;WP_010941514.1	WP_286350392.1;WP_324311653.1;BEH11149.1;UTG93536.1;UAC04909.1;QVW36096.1;WP_119331992.1;BBA69393.1;WP_010941514.1;AJY70590.1;ADI83692.1;AAR34180.1	DsbC;protein;protein-disulfide	-0.250771	0.381667	0.970495	0	0	12600000	8970000	7950000	8640000	8170000	8000000
AAR34183.1;ADI83695.1;AJY70593.1;BBA69396.1;QVW36099.1;UAC04912.1;UTG93539.1;WP_010941517.1;WP_045668063.1;WP_119331995.1	WP_010941517.1;WP_119331995.1;WP_045668063.1;UTG93539.1;UAC04912.1;QVW36099.1;BBA69396.1;AJY70593.1;ADI83695.1;AAR34183.1	HlyC/CorC;Magnesium;hemolysin;transporter;transporter,	-0.480076	0.293816	0.970495	0	0	1960000	1030000	2140000	957902	1380000	1340000
AAR34186.1;ADI83698.1;AJY70596.1;BBA69399.1;CAR79858.1;CBX83316.1;QVW36903.1;UAC05776.1;UTG94406.1;WP_193360263.1;WP_197714213.1	BEH11143.1;UTG94406.1;UTG94207.1;UAC05776.1;UAC05572.1;QVW36903.1;QVW36735.1;WP_197714213.1;WP_193360263.1;WP_119332526.1;WP_010942212.1;BBA70074.1;BBA69399.1;AJY71551.1;AJY70596.1;ADI84402.1;ADI83698.1;AAR34941.1;AAR34186.1;CBX83317.1;CBX83316.1;CAR79859.1;CAR79858.1	hypothetical;membrane-bound;protease;unnamed;zinc	-0.272401	0.311448	0.970495	0	0	13000000	11600000	8470000	9020000	7660000	10700000
AAR34188.1;ADI83702.2;AJY70598.1;QVW36103.1;UAC04916.1;UTG93543.1;WP_010941522.1;WP_214302979.1	WP_286350385.1;BEH11141.1;WP_214302979.1;WP_119332000.1;WP_010941522.1;UTG93543.1;UAC04916.1;QVW36103.1;BBA69401.1;AJY70598.1;ADI83702.2;AAR34188.1	TonB;TonB-dependent;energy;periplasmic	0.210177	0.49516	0.970495	0	0	458283	648790	347829	613946	592891	476237
AAR34189.1;ADI83703.1;AJY70599.1;BEH11140.1;QVW36104.1;UAC04917.1;UTG93544.1;WP_010941523.1;WP_214302980.1	WP_214302980.1;WP_119332001.1;WP_010941523.1;BEH11140.1;UTG93544.1;UAC04917.1;QVW36104.1;BBA69402.1;AJY70599.1;ADI83703.1;AAR34189.1	UTP--glucose-1-phosphate;glucose-1-phosphate	-0.288599	0.223532	0.970495	0	0	6020000	6860000	4770000	4780000	4180000	5490000
AAR34190.1;ADI83704.1;AJY70600.1;QVW36105.1;UAC04918.1;UTG93545.1;WP_010941524.1;WP_214302981.1	WP_010941524.1;WP_214302981.1;UTG93545.1;UAC04918.1;QVW36105.1;AJY70600.1;ADI83704.1;AAR34190.1	5,10-methylenetetrahydrofolate;methylenetetrahydrofolate	0.114144	0.613795	0.970495	0	0	2430000	1550000	1850000	2330000	1970000	2010000
AAR34191.2;ADI83705.1;AJY70601.1;BBA69404.1;BEH11138.1;QVW36106.1;UAC04919.1;UTG93546.1;WP_010941525.1;WP_119332003.1	BEH11138.1;UTG93546.1;UAC04919.1;QVW36106.1;WP_119332003.1;WP_010941525.1;BBA69404.1;AJY70601.1;AAR34191.2;ADI83705.1	5,10-methylenetetrahydrofolate;hypothetical;methylenetetrahydrofolate	0.30516	0.510291	0.970495	0	0	439626	574630	726272	596887	513632	1040000
AAR34194.1;ADI83708.2;AJY70604.1;QVW36904.1;UAC04922.1;UTG94407.1;WP_041914001.1	WP_041914001.1;UTG94407.1;UAC04922.1;QVW36904.1;AJY70604.1;ADI83708.2;AAR34194.1	DUF167;YggU;hypothetical;protein	0.309027	0.270837	0.970495	0	0	178279	140523	217037	200276	192525	271035
AAR34195.1;ADI83709.1;AJY70605.1;BBA69408.1;QVW36109.1;UAC04923.1;UTG93549.1	UTG93549.1;UAC04923.1;QVW36109.1;BBA69408.1;AJY70605.1;ADI83709.1;AAR34195.1	DivIVA;Septum;cell	0.287004	0.340042	0.970495	0	0	1690000	2240000	1840000	2180000	2990000	1870000
AAR34196.1;ADI83710.1;AJY70606.1;BBA69409.1;BEH11133.1;QVW36110.1;UAC04924.1;UTG93550.1;WP_010941530.1;WP_286350378.1	WP_286350378.1;WP_010941530.1;BEH11133.1;UTG93550.1;UAC04924.1;QVW36110.1;BBA69409.1;AJY70606.1;ADI83710.1;AAR34196.1	MULTISPECIES:;YggT;hypothetical;protein	0.307765	0.415347	0.970495	0	0	1590000	681228	1130000	1240000	1480000	1490000
AAR34198.1;ADI83713.1;AJY70608.1;QVW36112.1;UAC04926.1;UTG93552.1;WP_010941532.1	WP_119332008.1;WP_010941532.1;BEH11131.1;UTG93552.1;UAC04926.1;QVW36112.1;BBA69411.1;AJY70608.1;ADI83713.1;AAR34198.1	adenylate;diadenylate	0.189209	0.301364	0.970495	0	0	896168	906220	912224	904234	1210000	980799
AAR34199.1;ADI83714.1;AJY70609.1;BBA69412.1;QVW36113.1;UAC04927.1;UTG93553.1;WP_010941533.1;WP_119332009.1	BEH11130.1;WP_119332009.1;WP_010941533.1;UTG93553.1;UAC04927.1;QVW36113.1;BBA69412.1;AJY70609.1;ADI83714.1;AAR34199.1	C40;D-gamma-glutamyl-meso-diaminopimelic;peptidoglycan-binding;protein	0.185268	0.222847	0.970495	0	0	669325	522709	622092	624765	683145	754803
AAR34201.1;ADI83716.1;AJY70611.1;QVW36115.1;UAC04929.1;UTG93555.1;WP_010941535.1;WP_254278401.1	WP_010941535.1;WP_254278401.1;WP_119332011.1;BEH11128.1;UTG93555.1;UAC04929.1;QVW36115.1;BBA69414.1;AJY70611.1;ADI83716.1;AAR34201.1	B12-binding;radical	0.408766	0.372821	0.970495	0	0	259407	242698	283955	449777	200687	393070
AAR34202.1;ADI83717.1;AJY70612.1;BBA69415.1;BEH11127.1;QVW36116.1;UAC04930.1;UTG93556.1;WP_010941536.1	BEH11127.1;UTG93556.1;UAC04930.1;QVW36116.1;BBA69415.1;AJY70612.1;WP_010941536.1;ADI83717.1;AAR34202.1	hypothetical;lipoprotein;lipoprotein,	-0.128791	0.395746	0.970495	0	0	37900000	28700000	34100000	30200000	30100000	31800000
AAR34204.1;ADI83718.1;AJY70613.1;QVW36117.1;UAC04931.1;UTG93557.1;WP_010941537.1	WP_324311627.1;WP_286350371.1;WP_010941537.1;WP_119332012.1;BEH11126.1;UTG93557.1;UAC04931.1;QVW36117.1;BBA69416.1;AJY70613.1;ADI83718.1;AAR34204.1	AsmA;AsmA-like;hypothetical	0.0832694	0.645168	0.972476	0	0	1150000	832119	1180000	1180000	1020000	1150000
AAR34206.1;ADI83720.1;AJY70615.1;QVW36119.1;UAC04933.1;UTG93559.1;WP_010941539.1	WP_119332014.1;WP_010941539.1;UTG93559.1;UAC04933.1;QVW36119.1;BBA69418.1;AJY70615.1;ADI83720.1;AAR34206.1	diacylglycerol;diacylglycerol/lipid;sphingosine/diacylglycerol	-0.410142	0.22657	0.970495	0	0	1220000	1190000	1050000	1070000	533820	1000000
AAR34207.1;ADI83721.1;AJY70616.1;QVW36120.1;UAC04934.1;UTG93560.1;WP_010941540.1	WP_286350368.1;WP_119332015.1;WP_010941540.1;BEH11123.1;UTG93560.1;UAC04934.1;QVW36120.1;BBA69419.1;AJY70616.1;ADI83721.1;AAR34207.1	chemotaxis;response	-0.0831666	0.772287	0.988632	0	0	1680000	1410000	1730000	1390000	1140000	2020000
AAR34210.1;ADI83723.1;AJY70618.1;BEH11120.1;QVW36123.1;UAC04936.1;UTG93562.1;WP_010941543.1;WP_324311620.1	WP_324311620.1;BEH11120.1;UTG93562.1;UAC04936.1;QVW36123.1;WP_010941543.1;AJY70618.1;ADI83723.1;AAR34210.1	formate;molybdopterin;molybdopterin-binding	-0.559766	0.0752085	0.970495	1	0	4.57991e+06	4770000	3710000	2870000	3790000	2200000
AAR34211.1;ADI83724.1;AJY70619.1;QVW36124.1;UAC04937.1;UTG93563.1;WP_010941544.1;WP_214302982.1	WP_214302982.1;WP_010941544.1;UTG93563.1;UAC04937.1;QVW36124.1;AJY70619.1;ADI83724.1;AAR34211.1	HAMP;histidine;sensor	-0.329193	0.409752	0.970495	0	0	3740000	5820000	3380000	2780000	2960000	4560000
AAR34212.1;AJY70620.1;BBA69424.1;QVW36125.1;UAC04938.1;UTG93564.1;WP_010941545.1;WP_119332018.1	WP_119332018.1;WP_014551440.1;WP_010941545.1;UTG93564.1;UAC04938.1;QVW36125.1;BBA69424.1;AJY70620.1;ADI83725.1;AAR34212.1	ABC;hypothetical	0.108562	0.462111	0.970495	0	0	1770000	1980000	1880000	1760000	2000000	2310000
AAR34213.1;ADI83726.2;AJY70621.1;QVW36126.1;UAC04939.1;UTG93565.1;WP_235044970.1	WP_235044970.1;UTG93565.1;UAC04939.1;QVW36126.1;AJY70621.1;ADI83726.2;AAR34213.1	TonB-dependent;ligand-gated	0.491534	0.194541	0.970495	0	0	425618	498143	840412	712130	890167	878022
AAR34215.1;ADI83728.1;AJY70624.1;BBA69427.1;QVW36129.1;UAC04942.1;UTG93568.1;WP_010941549.1;WP_119332020.1	WP_010941549.1;WP_119332020.1;UTG93568.1;UAC04942.1;QVW36129.1;BBA69427.1;AJY70624.1;ADI83728.1;AAR34215.1	AAA;BioD;Phosphate;cobyrinic	0.167842	0.564187	0.970495	0	0	3150000	5060000	4110000	4940000	5430000	3470000
AAR34217.1;ADI83731.1;AJY70626.1;BEH11111.1;QVW36131.1;UAC04944.1;UTG93570.1;WP_010941551.1;WP_014551443.1;WP_254278402.1;WP_286350357.1	WP_286350357.1;WP_010941551.1;WP_254278402.1;WP_014551443.1;BEH11111.1;UTG93570.1;UAC04944.1;QVW36131.1;AJY70626.1;ADI83731.1;AAR34217.1	AAA;ATPase;MULTISPECIES:;hypothetical;zeta	0.237106	0.387198	0.970495	0	0	417042	305052	374505	337155	532742	422583
AAR34222.2;WP_010941557.1	WP_420804628.1;WP_014551447.1;WP_010941557.1;WP_331838622.1;WP_286350353.1;BEH11105.1;UTG94409.1;UAC05778.1;QVW36905.1;BBA69433.1;AJY70632.1;AAR34222.2;ADI83738.1	peroxiredoxin;peroxiredoxin,	0.0170131	0.864309	0.99447	0	0	3020000	2830000	2580000	2910000	2590000	3030000
AAR34223.1;BEH11104.1;CBL85751.1;UAC04950.1;WP_010941558.1	WP_045668066.1;WP_014551448.1;WP_010941558.1;BEH11104.1;UTG93576.1;UAC04950.1;QVW36137.1;BBA69434.1;AJY70633.1;ADI83739.1;AAR34223.1;CBL85751.1	MULTISPECIES:;peptidyl-prolyl;peptidylprolyl;unnamed	0.196747	0.332398	0.970495	0	0	4920000	3350000	4460000	4800000	4400000	5390000
AAR34225.1;UAC04952.1;WP_010941561.1	WP_045668067.1;WP_014551451.1;WP_254278405.1;WP_286350352.1;WP_324311597.1;BEH11102.1;WP_010941561.1;UTG93578.1;UAC04952.1;QVW36139.1;AJY70635.1;ADI83741.1;AAR34225.1	TldD/PmbA;zinc	-0.0721498	0.693896	0.973443	0	0	1400000	1380000	1320000	1070000	1260000	1570000
AAR34226.1;BEH11100.1;UAC05779.1;WP_235044973.1	WP_235044973.1;BEH11100.1;UAC05779.1;AAR34226.1	MULTISPECIES:;formylglycine-generating;protein	0.133618	0.79794	0.990681	0	1	269222	127529	403938	270134	222547	385708
AAR34227.1;BBA69439.1;BEH11099.1;UAC04954.1;UTG93580.1;WP_010941564.1;WP_119332030.1;WP_254278407.1;WP_286350351.1;WP_324311594.1	WP_324311594.1;WP_286350351.1;WP_254278407.1;WP_119332030.1;WP_045668068.1;WP_014551454.1;WP_010941564.1;BEH11099.1;UTG93580.1;UAC04954.1;QVW36141.1;BBA69439.1;AJY70637.1;ADI83744.1;AAR34227.1	ATP-dependent;DNA	-0.0333515	0.74644	0.981924	0	0	187680	157963	184719	185163	170794	162285
AAR34228.2;BEH11098.1;UAC04955.1;WP_010941565.1;WP_286350350.1	WP_286350350.1;WP_010941565.1;WP_254278408.1;WP_119332031.1;WP_045668069.1;WP_014551455.1;BEH11098.1;UTG93581.1;UAC04955.1;QVW36142.1;BBA69440.1;AJY70638.1;AAR34228.2;ADI83745.1	DUF445;MULTISPECIES:;hypothetical	0.0762659	0.794047	0.990681	0	0	2160000	2090000	2750000	1700000	2670000	3010000
AAR34236.1;ADI83757.1;AJY70649.1;BBA69452.1;BEH11086.1;QVW36154.1;UAC04967.1;UTG93593.1;WP_010941577.1;WP_014551466.1;WP_045668076.1;WP_214302988.1;WP_254278409.1	WP_045668076.1;WP_014551466.1;WP_010941577.1;WP_254278409.1;WP_214302988.1;BEH11086.1;UTG93593.1;UAC04967.1;QVW36154.1;BBA69452.1;AJY70649.1;ADI83757.1;AAR34236.1	Assimilatory;FAD-dependent;MULTISPECIES:;NAD(P)/FAD-dependent;pyridine	-1.31866	0.111317	0.970495	1	1	477152	610293	265763	150672	202180	189660
AAR34237.1;BEH11085.1;UAC04968.1;WP_010941578.1	BEH11085.1;WP_254278410.1;UTG93594.1;UAC04968.1;WP_214302989.1;QVW36155.1;WP_010941578.1;AAR34237.1	aldehyde;aldehyde:ferredoxin	0.0944819	0.761982	0.985743	0	0	2580000	1590000	1740000	1560000	2370000	2380000
AAR34240.1;UAC04971.1;WP_010941581.1	WP_010941581.1;WP_286350340.1;BEH11082.1;UAC04971.1;AAR34240.1	ATP-binding;DNA-binding	0.11613	0.714099	0.974322	0	0	2640000	1920000	2240000	1620000	2970000	2780000
AAR34241.1;AJY70654.1;CBG08184.1;CBV21706.1;QVW36159.1;UAC04972.1;UTG93598.1;WP_010941582.1	WP_014551471.1;WP_010941582.1;WP_286350339.1;BEH11081.1;UTG93598.1;UAC04972.1;QVW36159.1;BBA69457.1;AJY70654.1;ADI83762.1;AAR34241.1;CBV21706.1;CBG08184.1	ATP-dependent;DEAD/DEAH;RNA;unnamed	0.0383281	0.84709	0.991407	0	0	1540000	1580000	2080000	2070000	1620000	1650000
AAR34248.1;AJY70661.1;QVW36166.1;UAC04979.1;UTG93605.1;WP_010941589.1	WP_238525127.1;WP_010941589.1;WP_119332042.1;BEH11074.1;UTG93605.1;UAC04979.1;QVW36166.1;BBA69464.1;AJY70661.1;AAR34248.1	Rne/Rng;ribonuclease;ribonuclease,	0.36257	0.220709	0.970495	0	0	2450000	1790000	3110000	2580000	3430000	3440000
AAR34249.1;UAC04980.1;WP_010941590.1	WP_014551473.1;WP_010941590.1;WP_254278412.1;WP_286350332.1;BEH11073.1;WP_119332043.1;WP_045668081.1;UTG93606.1;UAC04980.1;QVW36167.1;BBA69465.1;AJY70662.1;ADI83771.1;AAR34249.1	ABC;ABC-F	-0.0602465	0.694189	0.973443	0	0	1550000	1720000	1620000	1630000	1770000	1290000
AAR34250.2;AJY70663.1;BBA69466.1;BEH11072.1;QVW36168.1;UAC04981.1;UTG93607.1;WP_010941591.1;WP_045668082.1;WP_119332044.1;WP_254278413.1	BEH11072.1;WP_254278413.1;UTG93607.1;UAC04981.1;QVW36168.1;WP_119332044.1;WP_010941591.1;WP_045668082.1;WP_014551474.1;BBA69466.1;AJY70663.1;AAR34250.2;ADI83772.1	ATP-dependent;Lon;endopeptidase;peptidase	-0.0906407	0.448433	0.970495	0	0	3580000	3660000	3270000	3470000	2860000	3540000
AAR34252.1;ADI83774.1;AJY70665.1;BEH11070.1;QVW36907.1;UAC05780.1;UTG94411.1;WP_010941593.1	BEH11070.1;WP_010941593.1;UTG94411.1;UAC05780.1;QVW36907.1;AJY70665.1;ADI83774.1;AAR34252.1	ABC;ATP-binding	0.0520382	0.917863	0.999308	0	0	1250000	620979	1840000	917278	1630000	1300000
AAR34253.1;ADI83775.1;AJY70666.1;BBA69469.1;BEH11069.1;QVW36170.1;UAC04983.1;UTG93609.1;WP_010941594.1;WP_119332047.1	WP_010941594.1;WP_119332047.1;BEH11069.1;UTG93609.1;UAC04983.1;QVW36170.1;BBA69469.1;AJY70666.1;ADI83775.1;AAR34253.1	ABC;MCE;MULTISPECIES:;MlaD;hypothetical	0.231903	0.154494	0.970495	0	0	2160000	2310000	2010000	2770000	2190000	2650000
AAR34254.2;BEH11068.1;UAC04984.1;WP_010941595.1;WP_286350329.1	WP_286350329.1;WP_119332048.1;BEH11068.1;WP_014551476.1;WP_010941595.1;UTG93610.1;UAC04984.1;QVW36171.1;BBA69470.1;AJY70667.1;AAR34254.2;ADI83776.2	MULTISPECIES:;insulinase;pitrilysin;zinc-dependent	0.0138722	0.905111	0.997459	0	0	3380000	3890000	3080000	3670000	3390000	3390000
AAR34255.1;UAC04985.1;WP_010941596.1	WP_286350328.1;WP_119332049.1;BEH11067.1;WP_014551477.1;WP_010941596.1;UTG93611.1;UAC04985.1;QVW36172.1;BBA69471.1;AJY70668.1;ADI83777.1;AAR34255.1	M16;insulinase;zinc-dependent	0.0578984	0.525123	0.970495	0	0	5760000	6330000	6470000	6350000	5990000	6980000
AAR34257.1;ADN78326.1;QVW36174.1;UAC04987.1;UTG93613.1;WP_010941598.1	WP_010941598.1;WP_119332050.1;UTG93613.1;UAC04987.1;QVW36174.1;BBA69473.1;ADN78326.1;AAR34257.1	rhodanese-like;three	0.70096	0.0360467	0.948398	0	0	1150000	1160000	685843	1740000	1720000	1410000
AAR34261.1;ADI83782.1;AJY70673.1;BBA69478.1;BEH11061.1;QVW36178.1;UAC04991.1;UTG93617.1;WP_010941602.1;WP_119332054.1;WP_286350326.1	WP_286350326.1;BEH11061.1;UTG93617.1;UAC04991.1;QVW36178.1;WP_119332054.1;BBA69478.1;AJY70673.1;ADI83782.1;AAR34261.1;WP_010941602.1	hypothetical	0.233275	0.463264	0.970495	0	0	3150000	1900000	3440000	2950000	2930000	4100000
AAR34269.1;ADI83790.1;AJY70681.1;BBA69486.1;QVW36186.1;UAC04999.1;UTG93624.1;WP_010941610.1;WP_119332061.1	WP_119332061.1;WP_010941610.1;UTG93624.1;UAC04999.1;QVW36186.1;BBA69486.1;AJY70681.1;ADI83790.1;AAR34269.1	Fructose-1,;histidinol;histidinol-phosphate;inositol	0.500427	0.231743	0.970495	0	0	321310	194513	407297	307941	468107	529827
AAR34270.2;ADI83791.2;AJY71952.1;BBA69487.1;QVW36908.1;UAC05781.1;UTG94413.1;WP_232008981.1;WP_235044976.1;WP_238525128.1	WP_238525128.1;WP_235044976.1;WP_232008981.1;UTG94413.1;UAC05781.1;QVW36908.1;BBA69487.1;AJY71952.1;AAR34270.2;ADI83791.2	PilZ;hypothetical;pilus	0.222906	0.301292	0.970495	0	0	1270000	1100000	1640000	1690000	1410000	1580000
AAR34271.1;ADI83793.2;AJY70682.1;CBF67368.1;CBU92241.1;QVW36187.1;UAC05000.1;UTG93625.1;WP_010941612.1	WP_286350316.1;WP_119332062.1;WP_010941612.1;BEH11051.1;UTG93625.1;UAC05000.1;QVW36187.1;BBA69488.1;AJY70682.1;ADI83793.2;AAR34271.1;CBU92241.1;CBF67368.1	PLP-dependent;cystathionine;trans-sulfuration;unnamed	-0.430003	0.419018	0.970495	0	0	6490000	3410000	3020000	3430000	2780000	3380000
AAR34272.1;ADI83794.1;AJY70683.1;BBA69489.1;CBF67367.1;CBU92240.1;QVW36188.1;UAC05001.1;UTG93626.1;WP_010941613.1;WP_119332063.1	WP_119332063.1;WP_010941613.1;UTG93626.1;UAC05001.1;QVW36188.1;BBA69489.1;AJY70683.1;ADI83794.1;AAR34272.1;CBU92240.1;CBF67367.1	Cystathionine;aminotransferase;cystathionine;trans-sulfuration;unnamed	0.154386	0.513251	0.970495	0	0	3050000	2230000	1980000	2430000	3050000	2600000
AAR34273.1;ADI83795.1;BBA69490.1;QVW36189.1;UAC05002.1;UTG93627.1;WP_010941614.1;WP_119332064.1	WP_119332064.1;WP_286350314.1;WP_010941614.1;BEH11049.1;UTG93627.1;UAC05002.1;QVW36189.1;BBA69490.1;ADI83795.1;AAR34273.1	EAL;putative;sensor	0.0934145	0.836198	0.991407	0	1	1560000	534024	1050000	1080000	1.05433e+06	1220000
AAR34274.1;ADI83796.1;AJY70686.1;BBA69491.1;BEH11048.1;QVW36190.1;UAC05003.1;UTG93628.1;WP_010941615.1;WP_119332065.1;WP_286350313.1	WP_286350313.1;WP_119332065.1;WP_010941615.1;BEH11048.1;UTG93628.1;UAC05003.1;QVW36190.1;BBA69491.1;AJY70686.1;ADI83796.1;AAR34274.1	ABC;Lipoprotein-releasing;MULTISPECIES:	0.666215	0.189323	0.970495	0	0	335586	597442	377929	578352	543722	958289
AAR34290.2;ADI83806.1;AJY70698.1;BBA69501.1;BEH11032.1;CBF90723.1;CBG02324.1;CBV04243.1;CBV15844.1;QVW36209.1;UAC05019.1;UTG93656.1;WP_010941631.1;WP_014551490.1;WP_119332075.1;WP_286350293.1	WP_286350293.1;WP_119332075.1;WP_014551490.1;BEH11032.1;WP_010941631.1;UTG93656.1;UAC05019.1;QVW36209.1;BBA69501.1;AJY70698.1;AAR34290.2;ADI83806.1;CBV15844.1;CBV04243.1;CBG02324.1;CBF90723.1	Fis;MULTISPECIES:;Nitrogen;sigma-54;sigma-54-dependent;unnamed	-0.0324517	0.902685	0.9965	0	0	1000000	1010000	1480000	1280000	1230000	902373
AAR34296.1;CBF87795.1;CBV02751.1;QVW36214.1;UAC05024.1;UTG93661.1;WP_010941636.1	WP_119332077.1;WP_010941636.1;UTG93661.1;UAC05024.1;QVW36214.1;BBA69507.1;AAR34296.1;CBV02751.1;CBF87795.1	S41;periplasmic;unnamed	0.0692073	0.605356	0.970495	0	0	1410000	1510000	1150000	1370000	1410000	1490000
AAR34300.1;ADI83815.1;AJY70707.1;QVW36218.1;UAC05028.1;UTG93665.1;WP_010941640.1	UTG93665.1;UAC05028.1;QVW36218.1;WP_010941640.1;AJY70707.1;ADI83815.1;AAR34300.1	DUF4255;hypothetical	1.35391	0.483718	0.970495	1	1	29284	63050.9	36965	33478	267213	29805
AAR34302.1;ADI83817.1;AJY70709.1;QVW36220.1;UAC05030.1;UTG93667.1;WP_010941642.1;WP_014551495.1	BEH11020.1;WP_014551495.1;UTG93667.1;UAC05030.1;QVW36220.1;WP_119332082.1;BBA69513.1;WP_010941642.1;AJY70709.1;ADI83817.1;AAR34302.1	phage;tail	-0.445055	0.0532115	0.970495	0	0	9760000	9390000	7560000	5860000	7140000	6620000
AAR34303.1;ADI83818.1;AJY70710.1;BBA69514.1;BEH11019.1;QVW36221.1;UAC05031.1;UTG93668.1	BEH11019.1;UTG93668.1;UAC05031.1;QVW36221.1;BBA69514.1;AJY70710.1;ADI83818.1;AAR34303.1	hypothetical;phage	0.350071	0.441306	0.970495	0	0	921043	537096	633755	1100000	1050000	516377
AAR34304.1;ADI83819.2;AJY71953.1;BBA69515.1;BEH11018.1;QVW36222.1;UAC05032.1;UTG93669.1;WP_286350283.1	WP_286350283.1;BEH11018.1;UTG93669.1;UAC05032.1;QVW36222.1;BBA69515.1;AJY71953.1;ADI83819.2;AAR34304.1	hypothetical;phage	0.0322733	0.902872	0.9965	0	1	899705	513355	872349	761163	805520	770427
AAR34314.1;ADI83828.1;AJY70719.1;QVW36230.1;UAC05040.1;UTG93677.1;WP_010941653.1;WP_214303007.1	UTG93677.1;UAC05040.1;WP_214303007.1;QVW36230.1;WP_010941653.1;AJY70719.1;ADI83828.1;AAR34314.1	hypothetical;putative	-0.783116	0.119782	0.970495	1	0	204380	324497	363257	182094	170151	166183
AAR34317.1;ADI83831.1;AJY70722.1;QVW36233.1;UAC05043.1;UTG93680.1;WP_010941656.1	WP_010941656.1;UTG93680.1;UAC05043.1;QVW36233.1;AJY70722.1;ADI83831.1;AAR34317.1	helix-hairpin-helix;hypothetical	-0.498169	0.142788	0.970495	0	0	1460000	1010000	1000000	943996	792236	720544
AAR34321.1;ADI83835.1;AJY70726.1;BBA69530.1;CBG13199.1;CBG16829.1;CBV26713.1;CBV30275.1;QVW36237.1;UAC05047.1;UTG93684.1;WP_010941660.1	BEH11003.1;WP_010941660.1;UTG93684.1;UAC05047.1;QVW36237.1;BBA69530.1;AJY70726.1;ADI83835.1;AAR34321.1;CBV26713.1;CBV30275.1;CBG16829.1;CBG13199.1	Fumarate;fumarate;unnamed	-0.0864915	0.570091	0.970495	0	0	16300000	15600000	14500000	15600000	16100000	12000000
AAR34325.1;ADI83839.1;AJY70729.1;BBA69533.1;BEH11000.1;QVW36240.1;UAC05050.1;UTG93687.1;WP_119332092.1	BEH11000.1;UTG93687.1;UAC05050.1;QVW36240.1;WP_119332092.1;BBA69533.1;AJY70729.1;ADI83839.1;AAR34325.1	DNA;Replicative;replicative	-0.00651331	0.98184	1	0	0	3410000	3310000	2160000	2260000	3560000	3020000
AAR34326.1;ADI83840.1;AJY70730.1;BBA69534.1;QVW36241.1;UAC05051.1;UTG93688.1;WP_010941664.1;WP_119332093.1	WP_324312555.1;BEH10999.1;UTG93688.1;UAC05051.1;QVW36241.1;WP_119332093.1;WP_010941664.1;BBA69534.1;AJY70730.1;ADI83840.1;AAR34326.1	Acyl-[acyl-carrier-protein]--UDP-N-acetylglucosamine;UDP-N-acetylglucosamine;acyl-(acyl;acyl-ACP--UDP-N-acetylglucosamine	-0.0697277	0.831934	0.991407	0	0	2800000	1590000	3240000	2370000	2600000	2300000
AAR34327.2;ADI83841.1;AJY70731.1;QVW36242.1;UAC05052.1;WP_010941665.1	WP_286350266.1;WP_010941665.1;WP_324312553.1;WP_254278436.1;WP_119332094.1;BEH10998.1;UTG93689.1;UAC05052.1;QVW36242.1;BBA69535.1;AJY70731.1;AAR34327.2;ADI83841.1	enoyl;hypothetical	0.0777269	0.777568	0.988715	0	0	3530000	4470000	3020000	3870000	4780000	2980000
AAR34329.1;ADI83844.1;AJY70733.1;QVW36244.1;UAC05054.1;UTG93691.1;WP_010941667.1	WP_010941667.1;UTG93691.1;UAC05054.1;QVW36244.1;AJY70733.1;ADI83844.1;AAR34329.1	amidohydrolase,;hydrolase	-0.0531417	0.875515	0.995781	0	0	4920000	4550000	2420000	4010000	4180000	3270000
AAR34330.1;ADI83845.1;AJY70734.1;QVW36245.1;UAC05055.1;UTG93692.1;WP_010941668.1	BEH10995.1;UTG93692.1;UAC05055.1;WP_119332097.1;WP_010941668.1;QVW36245.1;BBA69538.1;AJY70734.1;ADI83845.1;AAR34330.1	nitrogen;sigma-54;sigma-54-dependent;transcriptional	0.226376	0.128038	0.970495	0	0	15500000	13600000	17400000	16900000	19500000	18000000
AAR34331.1;ADI83846.1;AJY70735.1;BBA69539.1;QVW36246.1;UAC05056.1;UTG93693.1;WP_010941669.1;WP_119332098.1	WP_324312547.1;BEH10994.1;UTG93693.1;UAC05056.1;WP_119332098.1;WP_010941669.1;QVW36246.1;BBA69539.1;AJY70735.1;ADI83846.1;AAR34331.1	PAS;Sensor;histidine;nitrogen	-0.203761	0.300283	0.970495	0	0	1670000	1820000	2280000	1650000	1790000	1570000
AAR34333.1;ADI83849.1;AJY70737.1;QVW36248.1;UAC05058.1;UTG93695.1;WP_010941671.1	UTG93695.1;UAC05058.1;QVW36248.1;AJY70737.1;ADI83849.1;AAR34333.1;WP_010941671.1	hypothetical	0.179409	0.768009	0.985921	0	0	1080000	1760000	1540000	1070000	1130000	2760000
AAR34335.1;AJY70739.1;QVW36250.1;UAC05060.1;UTG93697.1;WP_010941673.1;WP_254278437.1	WP_119332102.1;WP_010941673.1;WP_286350258.1;WP_324312538.1;BEH10990.1;WP_254278437.1;UTG93697.1;UAC05060.1;QVW36250.1;WP_014551498.1;BBA69543.1;AJY70739.1;ADI83851.1;AAR34335.1	enoyl-(acyl;enoyl-ACP	-0.191974	0.346304	0.970495	0	0	4500000	4020000	3760000	4390000	3120000	3240000
AAR34336.1;ADI83852.2;AJY71954.1;BBA69544.1;BEH10989.1;QVW36910.1;UAC05783.1;UTG94416.1;WP_010941674.1;WP_014551499.1;WP_119332103.1;WP_324312602.1	WP_324312602.1;WP_119332103.1;WP_014551499.1;WP_010941674.1;BEH10989.1;UTG94416.1;UAC05783.1;QVW36910.1;BBA69544.1;AJY71954.1;ADI83852.2;AAR34336.1	GTP-binding;GTPase;GTPase,	0.191796	0.431221	0.970495	0	0	928015	756206	1240000	1080000	1140000	1120000
AAR34338.1;ADI83854.1;AJY70741.1;BBA69546.1;BEH10987.1;QVW36252.1;UAC05062.1;UTG93699.1;WP_010941676.1;WP_014551501.1;WP_119332105.1;WP_214303008.1	WP_119332105.1;WP_010941676.1;BEH10987.1;UTG93699.1;UAC05062.1;WP_214303008.1;QVW36252.1;WP_014551501.1;BBA69546.1;AJY70741.1;ADI83854.1;AAR34338.1	TPR;hypothetical;tetratricopeptide	0.418526	0.470494	0.970495	0	0	703609	1540000	919073	2130000	997118	1100000
AAR34340.1;AJY70743.1;QVW36254.1;UAC05064.1;UTG93701.1;WP_010941678.1	WP_010941678.1;WP_324312531.1;WP_014551503.1;UTG93701.1;UAC05064.1;QVW36254.1;AJY70743.1;ADI83856.1;AAR34340.1	OmpA;OmpA/MotB;chemotaxis;peptidoglycan-binding	-1.43496	0.121101	0.970495	0	1	1630000	860473	733271	646233	393076	153013
AAR34341.1;QVW36911.1;UAC05065.1;UTG94417.1;WP_010941679.1	WP_324312529.1;WP_119334043.1;WP_014551504.1;WP_010941679.1;BEH10984.1;UTG94417.1;UAC05065.1;QVW36911.1;BBA69549.1;AJY71955.1;ADI83857.2;AAR34341.1	Smr;Smr/MutS	0.098915	0.722115	0.975021	0	0	1700000	1460000	1490000	1800000	1150000	2030000
AAR34344.1;ADI83860.1;AJY70746.1;BBA69552.1;BEH10981.1;QVW36257.1;UAC05068.1;UTG93704.1;WP_010941682.1;WP_119332110.1	BEH10981.1;UTG93704.1;UAC05068.1;QVW36257.1;WP_010941682.1;WP_119332110.1;BBA69552.1;AJY70746.1;ADI83860.1;AAR34344.1	Hypoxanthine;hypoxanthine-guanine;hypoxanthine/guanine	-0.0764393	0.819181	0.991407	0	0	1360000	1290000	939184	1210000	1460000	733966
AAR34351.1;ADI83865.1;AJY70751.1;BBA69557.1;BEH10976.1;QVW36262.1;UAC05073.1;UTG93709.1;pdb|3H4N|A;pdb|3H4N|B	pdb|3H4N|B;pdb|3H4N|A;BEH10976.1;UTG93709.1;UAC05073.1;QVW36262.1;BBA69557.1;AJY70751.1;ADI83865.1;AAR34351.1	Chain;Cytochrome;cytochrome	-0.495284	0.436422	0.970495	0	0	1180000	1020000	358779	514065	808431	492758
AAR34352.1;AJY70752.1;QVW36263.1;UAC05074.1;WP_010941688.1	WP_254278440.1;UTG93710.1;UAC05074.1;QVW36263.1;WP_119332115.1;BBA69558.1;AJY70752.1;AAR34352.1;WP_010941688.1	hypothetical	0.501975	0.250566	0.970495	0	0	547117	366277	295253	734996	580949	395682
AAR34353.1;QVW36264.1;UAC05075.1;UTG93711.1;WP_010941689.1	UTG93711.1;UAC05075.1;QVW36264.1;WP_010941689.1;AAR34353.1	DUF2721;protein	-0.830378	0.0607652	0.970495	0	0	1370000	953086	1500000	559108	981165	609761
AAR34354.1;QVW36912.1;UAC05076.1;UTG93712.1;WP_010941690.1;WP_284676342.1	WP_284676342.1;BEH10973.1;UTG93712.1;UAC05076.1;QVW36912.1;WP_014551512.1;WP_010941690.1;BBA69560.1;AJY70755.1;ADI83868.1;AAR34354.1	N-carbamylputrescine;carbon-nitrogen	-0.243557	0.312526	0.970495	0	0	6840000	5560000	8200000	6540000	5950000	4910000
AAR34355.1;ADI83869.1;AJY70756.1;BBA69561.1;UAC05077.1;UTG93713.1;WP_010941691.1;WP_014551513.1	WP_214303010.1;UTG93713.1;UAC05077.1;QVW36265.1;BBA69561.1;WP_014551513.1;WP_010941691.1;AJY70756.1;ADI83869.1;AAR34355.1	Agmatine;agmatine	0.29779	0.280465	0.970495	0	0	4490000	3710000	3010000	4790000	5400000	3590000
AAR34360.1;ADI83873.1;QVW36269.1;UAC05081.1;UTG93717.1;WP_010941695.1;WP_014551516.1;WP_254278442.1	WP_014551516.1;WP_254278442.1;WP_010941695.1;UTG93717.1;UAC05081.1;QVW36269.1;ADI83873.1;AAR34360.1	methyl-accepting	0.369386	0.0236118	0.948398	0	0	1970000	1930000	2200000	2690000	2810000	2380000
AAR34369.1;ADI83882.1;QVW36278.1;UAC05090.1;UTG93727.1;WP_010941704.1;WP_214303016.1	WP_214303016.1;WP_010941704.1;UTG93727.1;UAC05090.1;QVW36278.1;ADI83882.1;AAR34369.1	MASE3;PAS;sensor	-0.213596	0.525313	0.970495	0	0	912999	876735	1290000	627673	1160000	868244
AAR34370.2;ADI83883.1;AJY70767.1;QVW36279.1;UAC05091.1;UTG93728.1;WP_010941705.1	UTG93728.1;WP_010941705.1;UAC05091.1;QVW36279.1;AJY70767.1;AAR34370.2;ADI83883.1	DNA;NAD(+);NADH	-0.10813	0.880672	0.995781	0	0	1220000	458726	2410000	1390000	1440000	963478
AAR34371.1;ADI83884.1;AJY70768.1;BBA69577.1;BEH10959.1;QVW36280.1;UAC05092.1;UTG93729.1;WP_010941706.1;WP_119332129.1	BEH10959.1;UTG93729.1;UAC05092.1;QVW36280.1;WP_119332129.1;BBA69577.1;WP_010941706.1;AJY70768.1;ADI83884.1;AAR34371.1	DUF4149;hypothetical;membrane	0.222388	0.548664	0.970495	0	0	731629	480721	397687	685182	748801	444388
AAR34372.1;ADI83885.2;AJY70769.1;BEH10958.1;UAC05093.1;UTG93730.1;WP_010941707.1;WP_014551521.1;WP_324312484.1	WP_119332130.1;WP_014551521.1;WP_010941707.1;WP_324312484.1;BEH10958.1;UTG93730.1;UAC05093.1;QVW36281.1;BBA69578.1;AJY70769.1;ADI83885.2;AAR34372.1	DUF2156;hypothetical;protein	-0.195449	0.639456	0.972164	0	0	411830	607712	583494	272537	671116	456280
AAR34373.1;AJY70770.1;UAC05094.1;UTG93731.1;WP_010941708.1	WP_420804624.1;WP_324312482.1;WP_119332131.1;WP_286350231.1;WP_010941708.1;BEH10957.1;UTG93731.1;UAC05094.1;QVW36282.1;BBA69579.1;AJY70770.1;AAR34373.1	SAM-dependent;class;methyltransferase	0.352659	0.32135	0.970495	0	0	705117	371995	818136	894530	786961	738573
AAR34382.1;ADI83895.1;AJY70779.1;BBA69588.1;BEH10948.1;QVW36291.1;UAC05102.1;UTG94418.1;WP_010941717.1;WP_119332140.1	WP_119332140.1;WP_010941717.1;BEH10948.1;UTG94418.1;UAC05102.1;QVW36291.1;BBA69588.1;AJY70779.1;ADI83895.1;AAR34382.1	hypothetical;protein;secondary	-0.272894	0.688734	0.973029	0	0	798228	535188	249895	692669	403952	213818
AAR34383.2;ADI83896.1;AJY70780.1;BBA69589.1;BEH10947.1;QVW36292.1;UAC05103.1;UTG93740.1;WP_010941718.1;WP_014551523.1;WP_119332141.1;WP_286350222.1	WP_286350222.1;WP_014551523.1;WP_010941718.1;WP_119332141.1;BEH10947.1;UTG93740.1;UAC05103.1;QVW36292.1;BBA69589.1;AJY70780.1;AAR34383.2;ADI83896.1	MULTISPECIES:;TPR;hypothetical;tetratricopeptide	-0.366898	0.154312	0.970495	0	0	620109	586110	437375	351444	440576	482502
AAR34385.1;ADI83898.1;AJY70782.1;BBA69591.1;BEH10945.1;QVW36294.1;UAC05105.1;UTG93742.1;WP_014551525.1;WP_119332143.1	BEH10945.1;UTG93742.1;UAC05105.1;QVW36294.1;WP_014551525.1;WP_119332143.1;BBA69591.1;AJY70782.1;ADI83898.1;AAR34385.1	Succinyl-CoA;succinate--CoA;succinyl-CoA	0.255086	0.688067	0.973029	0	0	1450000	678900	366136	843337	804256	1330000
AAR34387.1;ADI83900.1;AJY70784.1;UAC05107.1;UTG93744.1;WP_010941722.1;WP_254278447.1	WP_324312466.1;BEH10943.1;WP_254278447.1;UTG93744.1;UAC05107.1;QVW36296.1;WP_119332145.1;WP_010941722.1;BBA69593.1;AJY70784.1;ADI83900.1;AAR34387.1	amino;aspartate;pyridoxal	0.263034	0.191432	0.970495	0	0	8080000	5960000	7710000	7960000	10000000	8140000
AAR34391.1;ADI83904.1;AJY70787.1;BBA69597.1;BEH10939.1;QVW36298.1;UAC05110.1;UTG93747.1;WP_010941726.1;WP_119332148.1;WP_286350216.1	WP_286350216.1;WP_119332148.1;WP_010941726.1;BEH10939.1;UTG93747.1;UAC05110.1;QVW36298.1;BBA69597.1;AJY70787.1;ADI83904.1;AAR34391.1	MULTISPECIES:;PilX;hypothetical;pilus;type	0.0967468	0.912134	0.999308	0	1	99027	69657	108001	62138	198507	35231
AAR34393.2;ADI83906.1;AJY70789.1;UAC05112.1;UTG93749.1;WP_010941728.1	WP_324312455.1;WP_286350214.1;WP_010941728.1;WP_119332150.1;BEH10937.1;UTG93749.1;UAC05112.1;QVW36300.1;BBA69599.1;AJY70789.1;AAR34393.2;ADI83906.1	nucleotidyltransferase;putative	-0.571789	0.510815	0.970495	0	0	649595	185953	235655	225574	215307	279805
AAR34394.2;ADI83907.1;AJY70790.1;UAC05113.1;UTG93750.1;WP_010941729.1;WP_014551527.1	WP_214303017.1;WP_119332151.1;WP_014551527.1;WP_010941729.1;UTG93750.1;UAC05113.1;QVW36301.1;BBA69600.1;AJY70790.1;AAR34394.2;ADI83907.1	cation;sodium;sodium/solute	-1.26906	0.312767	0.970495	0	0	3800000	3930000	12900000	2850000	2210000	3500000
AAR34396.2;ADI83909.1;UAC05115.1;UTG93752.1;WP_010941731.1	WP_010941731.1;WP_324312452.1;BEH10934.1;UTG93752.1;UAC05115.1;AJY70792.1;AAR34396.2;ADI83909.1	cation;sodium/solute	0.157685	0.640779	0.972164	0	0	1130000	707892	1120000	809516	1070000	1420000
AAR34399.1;ADI83912.2;AJY70795.1;BEH10931.1;UAC05118.1;UTG93755.1	WP_324312449.1;BEH10931.1;UTG93755.1;UAC05118.1;AJY70795.1;ADI83912.2;AAR34399.1	hypothetical;lipoprotein;lipoprotein,	-0.0742386	0.836899	0.991407	0	0	2830000	1350000	2200000	2140000	1630000	2290000
AAR34404.2;ADI83917.1;AJY70800.1;BEH10926.1;UAC05123.1;UTG93760.1;WP_010941739.1;WP_286350208.1;WP_324312442.1	WP_324312442.1;WP_286350208.1;WP_010941739.1;BEH10926.1;UTG93760.1;UAC05123.1;AJY70800.1;AAR34404.2;ADI83917.1	ATP-binding;DnaA;DnaA/Hda;MULTISPECIES:	0.388912	0.56998	0.970495	0	0	330158	366647	783801	836108	251577	851029
AAR34407.1;ADI83919.1;AJY70802.1;BBA69612.1;BEH10924.1;QVW36313.1;UAC05125.1;UTG93762.1;WP_010941742.1;WP_286350206.1;WP_324312438.1	WP_010941742.1;WP_286350206.1;WP_324312438.1;BEH10924.1;UTG93762.1;UAC05125.1;QVW36313.1;BBA69612.1;AJY70802.1;ADI83919.1;AAR34407.1	MULTISPECIES:;epoxyqueuosine;hypothetical;protein	0.12012	0.841048	0.991407	0	0	662910	403053	1160000	481340	757893	1180000
AAR34409.2;ADI83921.1;BBA69614.1;BEH10922.1;QVW36314.1;UAC05126.1;UTG93763.1;WP_010941744.1;WP_119332162.1	WP_119332162.1;WP_010941744.1;BEH10922.1;UTG93763.1;UAC05126.1;QVW36314.1;BBA69614.1;AAR34409.2;ADI83921.1	SPFH;flotillin;hypothetical	-0.855032	0.137561	0.970495	0	0	325377	195813	400277	98179	230768	180489
AAR34414.1;ADI83926.1;AJY70809.1;BBA69619.1;BEH10917.1;QVW36319.1;UAC05131.1;UTG93768.1;WP_010941749.1;WP_014551528.1;WP_119332166.1;WP_286350200.1	WP_286350200.1;WP_119332166.1;WP_014551528.1;WP_010941749.1;BEH10917.1;UTG93768.1;UAC05131.1;QVW36319.1;BBA69619.1;AJY70809.1;ADI83926.1;AAR34414.1	ABC1;AarF/ABC1/UbiB;AarF/UbiB;MULTISPECIES:;phosphotransferase;putative;quinone;ubiquinone	-0.502529	0.0714324	0.970495	0	0	307218	421610	353391	279387	284328	200189
AAR34415.1;ADI83927.1;BEH10916.1;UAC05132.1;UTG93769.1;WP_010941750.1;WP_286350199.1	WP_119332167.1;WP_286350199.1;WP_010941750.1;BEH10916.1;UTG93769.1;UAC05132.1;QVW36320.1;BBA69620.1;ADI83927.1;AAR34415.1	DUF362;MULTISPECIES:;iron-sulfur	0.0668837	0.491587	0.970495	0	0	4050000	3920000	3410000	3970000	4200000	3750000
AAR34416.1;ADI83928.1;AJY70811.1;BBA69621.1;BEH10915.1;QVW36321.1;UAC05133.1;UTG93770.1;WP_010941751.1;WP_119332168.1;WP_286350198.1;WP_324312430.1	WP_119332168.1;WP_010941751.1;WP_286350198.1;WP_324312430.1;BEH10915.1;UTG93770.1;UAC05133.1;QVW36321.1;BBA69621.1;AJY70811.1;ADI83928.1;AAR34416.1	MULTISPECIES:;histidine;hypothetical;response	0.113248	0.817149	0.991407	0	0	7060000	3600000	3790000	4270000	3900000	7460000
AAR34417.2;ADN78334.1;AJY70812.1;UAC05134.1;WP_010941752.1;WP_041914003.1	WP_254278449.1;WP_041914003.1;WP_010941752.1;UTG93771.1;UAC05134.1;AJY70812.1;AAR34417.2;ADN78334.1	Tim44;transport;transporter	-0.0747678	0.649658	0.97248	0	0	19400000	15100000	15000000	17200000	14400000	15400000
AAR34429.1;ADI83940.2;AJY70824.1;BBA69632.1;CBF65011.1;CBF75674.1;CBU89882.1;CBU97242.1;QVW36330.1;UAC05146.1;UTG93783.1;WP_010941764.1	WP_324312413.1;BEH10902.1;UTG93783.1;UAC05146.1;QVW36330.1;BBA69632.1;AJY70824.1;ADI83940.2;AAR34429.1;WP_010941764.1;CBU89882.1;CBU97242.1;CBF75674.1;CBF65011.1	3-[(3aS,4S,7aS)-7a-methyl-1,5-dioxo-octahydro-1H-inden-4-yl]propanoyl:CoA;AMP-binding;acyl-CoA;unnamed	-0.00870288	0.91404	0.999308	0	0	5610000	6150000	6530000	5730000	6170000	6280000
AAR34431.1;ADI83942.2;UAC05148.1;UTG93785.1;WP_010941766.1	WP_286350191.1;WP_119332179.1;BEH10900.1;WP_010941766.1;UTG93785.1;UAC05148.1;QVW36332.1;BBA69634.1;AJY70826.1;ADI83942.2;AAR34431.1	M24;Xaa-Pro;aminopeptidase;prolidase	0.135712	0.528721	0.970495	0	0	5280000	4400000	6440000	6530000	6240000	4940000
AAR34432.1;AAS67341.1;ADI83943.1;UAC05150.1;UTG93786.1;WP_010941767.1	BEH10899.1;UTG93786.1;UAC05150.1;QVW36333.1;WP_119332180.1;WP_010941767.1;BBA69635.1;AJY70827.1;ADI83943.1;AAR34432.1;AAS67341.1	citrate	0.0209909	0.916516	0.999308	0	0	59900000	65400000	52100000	72200000	49500000	58300000
AAR34433.1;ADI83944.2;AJY71959.1;BBA69636.1;QVW36917.1;UAC05787.1;UTG93787.1;WP_010941768.1;WP_119334045.1	BEH10898.1;UTG93787.1;UAC05787.1;QVW36917.1;WP_119334045.1;WP_010941768.1;BBA69636.1;AJY71959.1;ADI83944.2;AAR34433.1	AMMECR1;AmmeMemoRadiSam;hypothetical	0	1	1	0	0	3140000	1710000	1540000	2130000	2360000	1900000
AAR34434.1;ADI83945.1;AJY70829.1;UAC05788.1;UTG94421.1;WP_010941769.1	BEH10897.1;UTG94421.1;UAC05788.1;QVW36334.1;WP_119332181.1;WP_010941769.1;BBA69637.1;AJY70829.1;ADI83945.1;AAR34434.1	aldehyde	-0.233977	0.569419	0.970495	0	0	4430000	7230000	3970000	3000000	4980000	5310000
AAR34439.1;ADI83950.1;AJY70834.1;UAC05155.1;UTG93792.1;WP_010941774.1	WP_286350184.1;WP_119332185.1;WP_010941774.1;BEH10893.1;UTG93792.1;UAC05155.1;QVW36339.1;BBA69641.1;AJY70834.1;ADI83950.1;AAR34439.1	adenosine;carbohydrate;sugar	0.447282	0.10695	0.970495	0	0	2000000	2010000	1410000	2000000	2820000	2570000
AAR34440.2;ADI83951.2;AJY70835.1;BBA69642.1;QVW36340.1;UAC05789.1;UTG94422.1;WP_010941775.1;WP_119332186.1;WP_394371618.1	WP_394371618.1;WP_286350183.1;WP_119332186.1;WP_010941775.1;BEH10892.1;UTG94422.1;UAC05789.1;QVW36340.1;BBA69642.1;AJY70835.1;AAR34440.2;ADI83951.2	TPR;hypothetical;tetratricopeptide	0.14652	0.363685	0.970495	0	0	938270	1140000	1080000	1260000	1250000	985878
AAR34441.1;ADI83952.1;AJY70836.1;UAC05156.1;UTG93793.1;WP_010941776.1	UTG93793.1;UAC05156.1;QVW36341.1;WP_010941776.1;WP_119332187.1;BBA69643.1;AJY70836.1;ADI83952.1;AAR34441.1	DNA-binding;DUF4115;helix-turn-helix	0.174586	0.505371	0.970495	0	0	1490000	1150000	1480000	1710000	1800000	1140000
AAR34442.1;ADI83953.2;AJY70837.1;UAC05157.1;UTG93794.1;WP_010941777.1;WP_235045026.1	WP_286350181.1;WP_235045026.1;WP_010941777.1;BEH10890.1;UTG93794.1;UAC05157.1;AJY70837.1;ADI83953.2;AAR34442.1	GAF;histidine	-0.343436	0.187703	0.970495	0	0	3250000	3390000	2990000	3240000	2190000	2160000
AAR34443.1;ADI83954.1;AJY70838.1;BBA69645.1;QVW36343.1;UAC05158.1;UTG93795.1;WP_010941778.1	WP_286350180.1;WP_010941778.1;BEH10889.1;UTG93795.1;UAC05158.1;QVW36343.1;BBA69645.1;AJY70838.1;ADI83954.1;AAR34443.1	Chemotaxis;chemotaxis;response	0.0255223	0.942598	1	0	0	667752	539972	1090000	844549	730594	763591
AAR34444.1;ADI83955.1;AJY70839.1;BEH10888.1;UAC05159.1;UTG93796.1;WP_010941779.1;WP_286350179.1	WP_286350179.1;BEH10888.1;WP_119332189.1;WP_010941779.1;UTG93796.1;UAC05159.1;QVW36344.1;BBA69646.1;AJY70839.1;ADI83955.1;AAR34444.1	MULTISPECIES:;universal	-0.0527594	0.758139	0.985743	0	0	4480000	4800000	3530000	4360000	3600000	4390000
AAR34445.2;ADI83956.1;AJY70840.1;BBA69647.1;BEH10887.1;QVW36345.1;UAC05160.1;UTG93797.1;WP_010941780.1;WP_286350178.1	WP_286350178.1;WP_010941780.1;BEH10887.1;UTG93797.1;UAC05160.1;QVW36345.1;BBA69647.1;AJY70840.1;AAR34445.2;ADI83956.1	Sporulation;histidine;response	-0.0905672	0.586912	0.970495	0	0	1410000	1070000	1300000	1020000	1280000	1250000
AAR34446.1;ADI83957.1;AJY70841.1;BBA69648.1;BEH10886.1;QVW36346.1;UAC05161.1;UTG93798.1;WP_010941781.1;WP_119332190.1;WP_286350177.1	WP_010941781.1;WP_286350177.1;WP_119332190.1;BEH10886.1;UTG93798.1;UAC05161.1;QVW36346.1;BBA69648.1;AJY70841.1;ADI83957.1;AAR34446.1	Chemotaxis;MULTISPECIES:;histidine;response	0.732963	0.266219	0.970495	0	0	233396	571771	407934	439340	1010000	566894
AAR34447.1;ADI83958.1;AJY70842.1;QVW36347.1;UAC05162.1;UTG93799.1;WP_010941782.1;WP_014551539.1	WP_014551539.1;WP_010941782.1;UTG93799.1;UAC05162.1;QVW36347.1;AJY70842.1;ADI83958.1;AAR34447.1	FAD-dependent;NAD(P)/FAD-dependent;hypothetical	0.916833	0.0410504	0.952267	0	0	749174	919903	1260000	1910000	1420000	2200000
AAR34448.1;ADI83959.1;AJY70843.1;QVW36348.1;UAC05163.1;UTG93800.1;WP_010941783.1	WP_324312395.1;WP_286350175.1;WP_119332192.1;WP_010941783.1;BEH10884.1;UTG93800.1;UAC05163.1;QVW36348.1;BBA69650.1;AJY70843.1;ADI83959.1;AAR34448.1	3'-5';3'-to-5';HD	0.109428	0.509122	0.970495	0	0	7070000	6350000	6250000	8070000	7240000	5910000
AAR34449.1;ADI83960.1;AJY70844.1;QVW36349.1;UAC05164.1;UTG93801.1;WP_010941784.1	WP_286350174.1;BEH10883.1;WP_119332193.1;WP_010941784.1;UTG93801.1;UAC05164.1;QVW36349.1;BBA69651.1;AJY70844.1;ADI83960.1;AAR34449.1	MBL;beta-lactamase;zinc-dependent	0.0520193	0.801792	0.990742	0	0	7900000	5300000	7500000	6350000	7930000	7180000
AAR34450.1;ADI83961.1;AJY70845.1;QVW36350.1;UAC05165.1;UTG93802.1;WP_010941785.1;WP_045668104.1;WP_254278454.1;WP_324312392.1	WP_324312392.1;WP_254278454.1;WP_119332194.1;WP_045668104.1;WP_010941785.1;UTG93802.1;UAC05165.1;QVW36350.1;BBA69652.1;AJY70845.1;ADI83961.1;AAR34450.1	bifunctional;phosphopantothenoylcysteine;phosphopantothenylcysteine	-0.0561828	0.81677	0.991407	0	0	2170000	3500000	2970000	2440000	3130000	2740000
AAR34454.1;ADI83965.1;AJY70849.1;BBA69656.1;BEH10878.1;QVW36354.1;UAC05169.1;UTG93806.1;WP_010941789.1;WP_119332198.1;WP_286350169.1	WP_286350169.1;WP_119332198.1;WP_010941789.1;BEH10878.1;UTG93806.1;UAC05169.1;QVW36354.1;BBA69656.1;AJY70849.1;ADI83965.1;AAR34454.1	MULTISPECIES:;PaaI;acyl-CoA;hypothetical	0.700401	0.277853	0.970495	0	1	153250	175849	272317	492587	213026	271662
AAR34505.1;ADI83966.1;AJY70850.1;CBF90724.1;CBG02325.1;CBV04244.1;CBV15845.1;QVW36355.1;UAC05170.1;UTG93807.1;WP_010941790.1	WP_286350168.1;WP_119332199.1;WP_010941790.1;BEH10877.1;UTG93807.1;UAC05170.1;QVW36355.1;BBA69657.1;AJY70850.1;ADI83966.1;AAR34505.1;CBV15845.1;CBV04244.1;CBG02325.1;CBF90724.1	Fis;sigma-54;sigma-54-dependent;unnamed	-0.0162903	0.902723	0.9965	0	0	4000000	5230000	5020000	4840000	4720000	4530000
AAR34506.1;ADI83967.1;AJY70851.1;CAD66600.1;QVW36356.1;UAC05171.1;UTG93808.1;WP_010941791.1	WP_324312386.1;WP_286350167.1;BEH10876.1;UTG93808.1;UAC05171.1;QVW36356.1;WP_119332200.1;WP_010941791.1;BBA69658.1;AJY70851.1;ADI83967.1;AAR34506.1;CAD66600.1	SMC;chromosome	0.186285	0.0235219	0.948398	0	0	1170000	1070000	1170000	1240000	1330000	1310000
AAR34507.1;ADI83968.1;AJY70852.1;QVW36357.1;UAC05172.1;UTG93809.1;WP_010941792.1	UTG93809.1;UAC05172.1;QVW36357.1;WP_010941792.1;AJY70852.1;ADI83968.1;AAR34507.1	GTPase;GTPase-activating;roadblock/LC7	-0.67184	0.139083	0.970495	0	0	732828	1300000	1240000	566278	833562	654532
AAR34508.1;ADI83969.1;AJY70853.1;BBA69660.1;QVW36358.1;UAC05173.1;UTG93810.1;WP_010941793.1;WP_119332202.1	WP_119332202.1;WP_010941793.1;UTG93810.1;UAC05173.1;QVW36358.1;BBA69660.1;AJY70853.1;ADI83969.1;AAR34508.1	Signal;cell;signal	-0.131069	0.365826	0.970495	0	0	2240000	2710000	2880000	2310000	2560000	2280000
AAR34514.1;ADI83974.1;AJY70859.1;QVW36363.1;UAC05178.1;UTG93815.1;WP_010941799.1	WP_324312376.1;BEH10869.1;UTG93815.1;UAC05178.1;QVW36363.1;WP_010941799.1;AJY70859.1;ADI83974.1;AAR34514.1	2',3'-cyclic;TIGR00282;metallophosphoesterase	-0.073759	0.799303	0.990681	0	0	3120000	3260000	3050000	3480000	3570000	1910000
AAR34525.1;ADI83987.1;AJY70869.1;QVW36373.1;UAC05187.1;UTG93825.1;WP_010941810.1	WP_119332214.1;WP_010941810.1;UTG93825.1;UAC05187.1;QVW36373.1;BBA69676.1;AJY70869.1;ADI83987.1;AAR34525.1	EAL;cyclic;diguanylate	-0.681652	0.294492	0.970495	0	0	3440000	7750000	9790000	4520000	4110000	4450000
AAR34526.1;ADI83988.1;AJY70870.1;BBA69677.1;QVW36374.1;UAC05188.1;UTG93826.1;WP_010941811.1;WP_045668109.1;WP_119332215.1	WP_324312355.1;WP_286350149.1;BEH10856.1;UTG93826.1;UAC05188.1;QVW36374.1;WP_119332215.1;WP_045668109.1;WP_010941811.1;BBA69677.1;AJY70870.1;ADI83988.1;AAR34526.1	Hopanoid;hopanoid;radical	0.0798928	0.658627	0.97248	0	0	2750000	3350000	2330000	2930000	3220000	2760000
AAR34527.1;ADI83989.1;AJY70871.1;BBA69678.1;QVW36375.1;UAC05189.1;UTG93827.1;WP_010941812.1;WP_119332216.1;WP_324312353.1	WP_324312353.1;UTG93827.1;UAC05189.1;QVW36375.1;WP_119332216.1;WP_010941812.1;BBA69678.1;AJY70871.1;ADI83989.1;AAR34527.1	Chitooligosaccharide;hopanoid;hydrolase;hydrolase,	0.313366	0.0894669	0.970495	0	0	1750000	1550000	1770000	1810000	2280000	2210000
AAR34528.1;ADI83990.1;AJY70872.1;BBA69679.1;QVW36376.1;UAC05190.1;UTG93828.1;WP_010941813.1	WP_010941813.1;UTG93828.1;UAC05190.1;QVW36376.1;BBA69679.1;AJY70872.1;ADI83990.1;AAR34528.1	DMT;EamA;hypothetical;membrane	-0.238086	0.736303	0.980878	0	0	357783	738187	563711	798775	501257	107161
AAR34531.1;ADI83993.1;AJY70876.1;BBA69682.1;UAC05193.1;UTG93831.1;WP_010941816.1;WP_119332219.1	WP_119332219.1;WP_010941816.1;UTG93831.1;UAC05193.1;BBA69682.1;AJY70876.1;ADI83993.1;AAR34531.1	NrdH-redoxin;glutaredoxin;hypothetical	-0.251801	0.446661	0.970495	0	0	4500000	2790000	3200000	3680000	2880000	2250000
AAR34534.1;ADI83996.1;QVW36382.1;UAC05196.1;UTG93834.1;WP_010941819.1	WP_119332222.1;WP_010941819.1;WP_286350143.1;WP_324312343.1;BEH10850.1;UTG93834.1;UAC05196.1;QVW36382.1;BBA69685.1;AJY70879.1;ADI83996.1;AAR34534.1	Fe-Mn;superoxide	-0.131398	0.612583	0.970495	0	0	19200000	13500000	12100000	13900000	14200000	12800000
AAR34536.1;ADI83998.1;AJY70881.1;BEH10848.1;QVW36384.1;UAC05198.1;UTG93836.1;WP_010941821.1	BEH10848.1;UTG93836.1;UAC05198.1;QVW36384.1;AJY70881.1;ADI83998.1;AAR34536.1;WP_010941821.1	hypothetical;quinol	0.252334	0.397474	0.970495	0	0	376469	215530	382846	353737	453287	354146
AAR34537.1;ADI83999.1;AJY71962.1;BBA69688.1;BEH10847.1;QVW36385.1;UAC05199.1;UTG93837.1;WP_010941822.1;WP_119332225.1	WP_119332225.1;WP_010941822.1;BEH10847.1;UTG93837.1;UAC05199.1;QVW36385.1;BBA69688.1;AJY71962.1;ADI83999.1;AAR34537.1	Macrolide;efflux;hemolysin	0.160694	0.231974	0.970495	0	0	1250000	1060000	1000000	1190000	1330000	1180000
AAR34541.2;ADI84003.1;AJY70885.1;QVW36389.1;UAC05203.1;UTG93841.1;WP_010941826.1;WP_014551543.1	WP_324312336.1;WP_014551543.1;WP_010941826.1;BEH10843.1;UTG93841.1;UAC05203.1;QVW36389.1;AJY70885.1;AAR34541.2;ADI84003.1	GAF;diguanylate;phosphoenolpyruvate--protein	0.21159	0.4851	0.970495	0	0	1120000	615522	811972	970193	839712	1140000
AAR34542.1;ADI84004.1;AJY70886.1;QVW36390.1;UAC05204.1;UTG93842.1;WP_010941827.1	WP_119332230.1;WP_286350135.1;WP_010941827.1;BEH10842.1;UTG93842.1;UAC05204.1;QVW36390.1;BBA69693.1;AJY70886.1;ADI84004.1;AAR34542.1	TPR;hypothetical;tetratricopeptide	-0.0384741	0.762623	0.985743	0	0	1540000	1650000	1370000	1430000	1660000	1350000
AAR34543.1;ADI84005.1;AJY70887.1;BBA69694.1;QVW36391.1;UAC05205.1;UTG93843.1;WP_010941828.1;WP_119332231.1;WP_324312333.1	WP_119332231.1;WP_010941828.1;WP_324312333.1;BEH10841.1;UTG93843.1;UAC05205.1;QVW36391.1;BBA69694.1;AJY70887.1;ADI84005.1;AAR34543.1	YtxH;hypothetical	-0.371424	0.523126	0.970495	0	0	4930000	2340000	2070000	2070000	2290000	2860000
AAR34550.1;ADI84011.1;AJY70893.1;BBA69699.1;BEH10836.1;QVW36397.1;UAC05211.1;UTG93849.1;WP_010941834.1;WP_119332236.1	WP_324312327.1;BEH10836.1;UTG93849.1;UAC05211.1;QVW36397.1;WP_119332236.1;WP_010941834.1;BBA69699.1;AJY70893.1;ADI84011.1;AAR34550.1	Nucleoside;nucleoside;pyrophosphatase	0.348185	0.0482374	0.970495	0	0	675269	559633	656900	795731	724388	888065
AAR34551.1;ADI84012.1;AJY70894.1;BBA69700.1;BEH10835.1;QVW36398.1;UAC05212.1;UTG93850.1;WP_010941835.1;WP_119332237.1	BEH10835.1;UTG93850.1;WP_119332237.1;WP_010941835.1;UAC05212.1;QVW36398.1;BBA69700.1;AJY70894.1;ADI84012.1;AAR34551.1	Queuine;queuine;tRNA	0.0196964	0.982551	1	0	0	1160000	488606	3300000	1620000	936630	2460000
AAR34552.1;ADI84013.1;AJY70895.1;BBA69702.1;BEH10833.1;QVW36399.1;UAC05213.1;UTG93851.1;WP_010941836.1;WP_014551545.1;WP_119332238.1	BEH10833.1;UTG93851.1;UAC05213.1;QVW36399.1;WP_014551545.1;WP_010941836.1;WP_119332238.1;BBA69702.1;AJY70895.1;ADI84013.1;AAR34552.1	fumarate;hypothetical;succinate	0.104634	0.512503	0.970495	0	0	15100000	17100000	13000000	17700000	16700000	14200000
AAR34553.1;ADI84014.2;AJY70896.1;BBA69703.1;QVW36400.1;UAC05214.1;UTG93852.1;WP_010941837.1	BEH10832.1;UTG93852.1;UAC05214.1;QVW36400.1;BBA69703.1;WP_010941837.1;AJY70896.1;ADI84014.2;AAR34553.1	Fumarate;fumarate;succinate	0.0129557	0.937392	1	0	0	83200000	76500000	73100000	88900000	82300000	63700000
AAR34554.1;ADI84015.1;AJY70897.1;BBA69704.1;WP_010941838.1	BEH10831.1;UTG94424.1;UAC05792.1;QVW36919.1;BBA69704.1;WP_010941838.1;AJY70897.1;ADI84015.1;AAR34554.1	Fumarate;succinate	-0.322769	0.464296	0.970495	0	0	54800000	42800000	31100000	44600000	40000000	18300000
AAR34556.1;ADI84018.1;AJY70899.1;BBA69706.1;CBF59699.1;CBF67045.1;CBU84943.1;CBU91918.1;QVW36402.1;UAC05216.1;UTG93854.1;WP_010941840.1;WP_119332240.1;WP_324312322.1	WP_324312322.1;WP_119332240.1;WP_010941840.1;BEH10829.1;UTG93854.1;UAC05216.1;QVW36402.1;BBA69706.1;AJY70899.1;ADI84018.1;AAR34556.1;CBU91918.1;CBU84943.1;CBF67045.1;CBF59699.1	ATP-dependent;cell;unnamed	0.192151	0.248892	0.970495	0	0	2260000	2320000	2720000	2620000	2530000	3190000
AAR34557.2;ADI84019.1;AJY70900.1;BBA69707.1;BEH10828.1;QVW36403.1;UAC05217.1;UTG93855.1	BEH10828.1;UTG93855.1;UAC05217.1;QVW36403.1;BBA69707.1;AJY70900.1;AAR34557.2;ADI84019.1	hypothetical	0.445488	0.0120213	0.875241	0	0	2140000	1750000	1970000	2770000	2620000	2590000
AAR34558.1;ADI84020.2;AJY71963.1;QVW36404.1;UAC05218.1;UTG93856.1;WP_010941842.1;WP_014551546.1	WP_286350123.1;BEH10827.1;UTG93856.1;UAC05218.1;QVW36404.1;WP_010941842.1;WP_014551546.1;WP_119334047.1;BBA69708.1;AJY71963.1;ADI84020.2;AAR34558.1	4-alpha-glucanotransferase	0.213192	0.199278	0.970495	0	0	1460000	1360000	1450000	1570000	1490000	1890000
AAR34559.1;ADI84021.1;AJY70901.1;BBA69709.1;CBF67366.1;CBU92239.1;QVW36405.1;UAC05219.1;UTG93857.1;WP_010941843.1;WP_119332241.1	WP_286350122.1;WP_010941843.1;WP_119332241.1;BEH10826.1;UTG93857.1;UAC05219.1;QVW36405.1;BBA69709.1;AJY70901.1;ADI84021.1;AAR34559.1;CBU92239.1;CBF67366.1	Methionine;O-acetyl-L-homoserine;O-acetylhomoserine;unnamed	0.0319036	0.852269	0.991528	0	0	29700000	29500000	21300000	29100000	26900000	26300000
AAR34561.1;ADI84023.1;AJY70902.1;BBA69711.1;BEH10824.1;QVW36407.1;UAC05220.1;UTG93859.1;WP_010941845.1;WP_119332243.1;WP_254278458.1;WP_324312314.1	WP_010941845.1;WP_324312314.1;BEH10824.1;WP_254278458.1;UTG93859.1;UAC05220.1;QVW36407.1;WP_119332243.1;BBA69711.1;AJY70902.1;ADI84023.1;AAR34561.1	adenosine;adenosine-specific;hypothetical	0.384141	0.691826	0.973443	0	0	249723	105611	116103	127322	86585	401357
AAR34564.2;ADI84024.1;AJY70903.1;BBA69712.1;BEH10823.1;QVW36408.1;UAC05221.1;UTG93860.1;WP_010941846.1;WP_014551547.1;WP_286350119.1	WP_286350119.1;WP_014551547.1;WP_010941846.1;BEH10823.1;UTG93860.1;UAC05221.1;QVW36408.1;BBA69712.1;AJY70903.1;AAR34564.2;ADI84024.1	LOW;MULTISPECIES:;Rhomboid;protease;rhomboid;rhomboid-related	-0.0275244	0.962785	1	0	0	2150000	3030000	1170000	1170000	1850000	3210000
AAR34566.1;ADI84026.1;AJY70905.1;BBA69714.1;BEH10821.1;QVW36410.1;UAC05223.1;UTG93862.1;WP_010941848.1;WP_119332245.1;WP_324312311.1	WP_324312311.1;BEH10821.1;UTG93862.1;UAC05223.1;QVW36410.1;WP_119332245.1;WP_010941848.1;BBA69714.1;AJY70905.1;ADI84026.1;AAR34566.1	tRNA	0.328072	0.187373	0.970495	0	0	4910000	4190000	4960000	6520000	6500000	4630000
AAR34568.1;ADI84027.1;AJY70906.1;BBA69715.1;QVW36411.1;UAC05224.1;UTG93863.1;WP_010941849.1;WP_119334048.1	WP_286350116.1;BEH10820.1;WP_119334048.1;WP_010941849.1;UTG93863.1;UAC05224.1;QVW36411.1;BBA69715.1;AJY70906.1;ADI84027.1;AAR34568.1	PilZ;hypothetical;pilus	0.292692	0.134465	0.970495	0	0	1010000	1110000	1170000	1550000	1290000	1190000
AAR34569.1;ADI84028.1;AJY70907.1;QVW36412.1;UAC05225.1;UTG93864.1;WP_010941850.1	WP_324312308.1;WP_286350115.1;WP_010941850.1;WP_119332246.1;BEH10819.1;UTG93864.1;UAC05225.1;QVW36412.1;BBA69716.1;AJY70907.1;ADI84028.1;AAR34569.1	class;ketose-1,6-bisphosphate;ketose-bisphosphate	0.167151	0.419537	0.970495	0	0	7270000	8470000	6240000	9660000	7960000	7060000
AAR34574.1;ADI84033.1;AJY70910.1;BEH10814.1;QVW36416.1;UAC05229.1;UTG93867.1;WP_010941855.1;WP_286350112.1	WP_324312301.1;WP_286350112.1;BEH10814.1;UTG93867.1;UAC05229.1;QVW36416.1;WP_119332249.1;WP_010941855.1;BBA69721.1;AJY70910.1;ADI84033.1;AAR34574.1	3-phosphoglycerate;D-3-phosphoglycerate;phosphoglycerate	0.0610462	0.320806	0.970495	0	0	18000000	16100000	16800000	17400000	17500000	18200000
AAR34575.1;ADI84034.1;AJY70911.1;BBA69722.1;QVW36417.1;UAC05230.1;UTG93868.1;WP_010941856.1;WP_119332250.1	WP_010941856.1;WP_119332250.1;UTG93868.1;UAC05230.1;QVW36417.1;BBA69722.1;AJY70911.1;ADI84034.1;AAR34575.1	Thermonuclease;nuclease;nuclease,;thermonuclease	-0.234686	0.385031	0.970495	0	0	1140000	827160	1190000	1000000	1020000	663176
AAR34576.1;ADI84035.1;AJY70912.1;BBA69723.1;QVW36418.1;UAC05231.1;UTG93869.1;WP_010941857.1;WP_119332251.1	WP_286350110.1;BEH10812.1;UTG93869.1;UAC05231.1;QVW36418.1;WP_119332251.1;WP_010941857.1;BBA69723.1;AJY70912.1;ADI84035.1;AAR34576.1	30S;RNA-binding	-0.0564309	0.825834	0.991407	0	0	27000000	26800000	21800000	27300000	28400000	17000000
AAR34577.1;ADI84036.1;AJY70913.1;QVW36419.1;UAC05232.1;UTG93870.1;WP_010941858.1;WP_254278460.1	BEH10811.1;WP_254278460.1;UTG93870.1;UAC05232.1;QVW36419.1;WP_119332252.1;WP_010941858.1;BBA69724.1;AJY70913.1;ADI84036.1;AAR34577.1	transcription	-0.0489814	0.694877	0.973443	0	0	810821	695067	898654	782289	776736	765250
AAR34578.1;ADI84037.1;AJY70914.1;BEH10810.1;QVW36420.1;UAC05233.1;UTG93871.1;WP_010941859.1;WP_286350108.1	WP_286350108.1;WP_010941859.1;BEH10810.1;UTG93871.1;UAC05233.1;QVW36420.1;AJY70914.1;ADI84037.1;AAR34578.1	NTP;mannose-1-phosphate	-0.41935	0.047618	0.970495	0	0	2490000	2210000	2000000	1740000	1870000	1400000
AAR34579.1;ADI84038.2;AJY70915.1;BBA69726.1;BEH10809.1;QVW36421.1;UAC05234.1;UTG93872.1;WP_010941860.1;WP_119332254.1	BEH10809.1;WP_119332254.1;WP_010941860.1;UTG93872.1;UAC05234.1;QVW36421.1;BBA69726.1;AJY70915.1;ADI84038.2;AAR34579.1	K(+)/H(+);potassium;potassium/proton	1.99369	0.248869	0.970495	0	1	290888	261385	215806	1820000	176890	1.06201e+06
AAR34580.2;ADI84039.1;AJY70916.1;BBA69727.1;QVW36422.1;UAC05235.1;UTG93873.1;WP_010941861.1;WP_119332255.1	UTG93873.1;UAC05235.1;QVW36422.1;WP_119332255.1;WP_010941861.1;BBA69727.1;AJY70916.1;AAR34580.2;ADI84039.1	Inner;Kef-type;cation:proton;monovalent;sodium:proton	-0.682267	0.269528	0.970495	0	0	401341	815210	437042	379274	471744	179477
AAR34581.1;ADI84040.1;AJY70917.1;BBA69728.1;QVW36423.1;UAC05236.1;UTG93874.1;WP_010941862.1;WP_324312293.1	WP_010941862.1;WP_286350105.1;WP_324312293.1;BEH10807.1;UTG93874.1;UAC05236.1;QVW36423.1;BBA69728.1;AJY70917.1;ADI84040.1;AAR34581.1	Flavodoxin;flavodoxin;flavodoxin,	-0.0268167	0.823369	0.991407	0	0	1650000	2040000	1740000	1920000	1710000	1700000
AAR34583.1;ADI84042.2;QVW36425.1;UAC05238.1;UTG93876.1;WP_010941864.1	UTG93876.1;UAC05238.1;QVW36425.1;WP_010941864.1;ADI84042.2;AAR34583.1	HesB/YadR/YfhF;iron-sulfur	0.874567	0.0887868	0.970495	0	0	4080000	4650000	4660000	5930000	8520000	10100000
AAR34584.1;ADI84043.1;AJY70919.1;BBA69732.1;QVW36426.1;UAC05239.1;UTG93877.1;WP_010941865.1	WP_010941865.1;UTG93877.1;UAC05239.1;QVW36426.1;BBA69732.1;AJY70919.1;ADI84043.1;AAR34584.1	hypothetical;membrane;trimeric	0.553024	0.164905	0.970495	1	0	313655	280537	538588	676563	516099	469305
AAR34585.1;ADI84044.1;AJY70920.1;QVW36427.1;UAC05240.1;UTG93878.1;WP_010941866.1	UTG93878.1;UAC05240.1;QVW36427.1;WP_010941866.1;AJY70920.1;ADI84044.1;AAR34585.1	DUF4197;hypothetical;lipoprotein	0.354625	0.405073	0.970495	0	0	771716	452185	343358	820719	653363	529899
AAR34586.2;ADI84045.1;AJY70921.1;QVW36428.1;UAC05241.1;UTG93879.1;WP_010941867.1;WP_045668116.1;WP_254278461.1	WP_045668116.1;WP_010941867.1;WP_254278461.1;WP_119332258.1;UTG93879.1;UAC05241.1;QVW36428.1;BBA69734.1;AJY70921.1;AAR34586.2;ADI84045.1	MBL;beta-lactamase;metal-dependent	0.0632516	0.831731	0.991407	0	0	1830000	2880000	2430000	2360000	1940000	3160000
AAR34588.1;ADI84047.1;AJY70923.1;QVW36430.1;UAC05243.1;UTG93881.1;WP_010941869.1	WP_324312274.1;BEH10797.1;UTG93881.1;UAC05243.1;QVW36430.1;WP_119332259.1;BBA69736.1;WP_010941869.1;AJY70923.1;ADI84047.1;AAR34588.1	DUF2950;hypothetical;protein	-0.0268385	0.942033	1	0	0	887637	549480	438629	516185	649449	675540
AAR34589.1;ADI84048.1;AJY70924.1;BBA69737.1;QVW36431.1;UAC05244.1;UTG93882.1;WP_010941870.1;WP_119332260.1	WP_324312272.1;BEH10796.1;WP_119332260.1;UTG93882.1;UAC05244.1;QVW36431.1;WP_010941870.1;BBA69737.1;AJY70924.1;ADI84048.1;AAR34589.1	DUF3300;hypothetical	-0.277351	0.493004	0.970495	0	0	1190000	586530	802728	576023	792261	759874
AAR34590.1;ADI84049.1;AJY70925.1;QVW36432.1;UAC05245.1;UTG93883.1;WP_010941871.1	WP_010941871.1;UTG93883.1;UAC05245.1;QVW36432.1;AJY70925.1;ADI84049.1;AAR34590.1	SAM-dependent;helix-turn-helix;methyltransferase	-0.493376	0.123958	0.970495	1	1	1.05524e+06	698067	999948	753336	667787	534685
AAR34596.1;ADI84055.1;AJY70930.1;BBA69744.1;QVW36437.1;UAC05250.1;UTG93888.1;WP_010941877.1;WP_045668120.1	WP_010941877.1;WP_045668120.1;UTG93888.1;UAC05250.1;QVW36437.1;BBA69744.1;AJY70930.1;ADI84055.1;AAR34596.1	Alkaline;chemotaxis;response	0.362231	0.12048	0.970495	0	0	1840000	1450000	1440000	2370000	1760000	1950000
AAR34598.1;ADI84057.2;QVW36439.1;UAC05252.1;UTG93890.1;WP_010941879.1	UTG93890.1;UAC05252.1;QVW36439.1;WP_010941879.1;ADI84057.2;AAR34598.1	acetoin;histone	0.376309	0.425638	0.970495	0	0	456244	382115	313650	488461	306736	700130
AAR34599.2;ADI84058.1;AJY70934.1;BBA69747.1;BEH10786.1;QVW36440.1;UAC05253.1;UTG93891.1;WP_010941880.1;WP_119332267.1	WP_324312256.1;BEH10786.1;UTG93891.1;UAC05253.1;QVW36440.1;WP_119332267.1;BBA69747.1;AJY70934.1;AAR34599.2;ADI84058.1;WP_010941880.1	hypothetical	0.168205	0.619805	0.970495	0	0	115225	181658	234230	182073	175124	239593
AAR34600.1;ADI84059.1;QVW36441.1;UAC05254.1;UTG93892.1;WP_010941881.1	WP_324312254.1;BEH10785.1;UTG93892.1;UAC05254.1;QVW36441.1;WP_119332268.1;BBA69748.1;AJY70935.1;ADI84059.1;AAR34600.1;WP_010941881.1	hypothetical	0.395831	0.032995	0.948398	0	0	11300000	9010000	9180000	12900000	14000000	11900000
AAR34603.2;ADI84061.1;BBA69751.1;BEH10782.1;QVW36922.1;UAC05256.1;UTG94428.1;WP_041914047.1	BEH10782.1;WP_041914047.1;UTG94428.1;UAC05256.1;QVW36922.1;BBA69751.1;AAR34603.2;ADI84061.1	ABC;putative	-0.0441712	0.347891	0.970495	0	0	598440	603190	590985	550658	588092	599812
AAR34605.2;ADI84063.1;AJY70939.1;BBA69753.1;QVW36444.1;UAC05258.1;UTG93895.1;WP_010941885.1;WP_119332270.1	UTG93895.1;UAC05258.1;QVW36444.1;WP_119332270.1;BBA69753.1;AJY70939.1;AAR34605.2;ADI84063.1;WP_010941885.1	hypothetical;lipoprotein;outer	0.142604	0.443028	0.970495	0	0	1140000	1150000	1560000	1400000	1510000	1340000
AAR34606.1;ADI84064.1;AJY70940.1;BBA69754.1;BEH10779.1;QVW36445.1;UAC05259.1;UTG93896.1;WP_010941886.1;WP_119332271.1;WP_324312245.1	WP_324312245.1;BEH10779.1;UTG93896.1;UAC05259.1;QVW36445.1;WP_119332271.1;BBA69754.1;AJY70940.1;ADI84064.1;AAR34606.1;WP_010941886.1	ABC;hypothetical	-0.428838	0.562506	0.970495	0	0	595538	661912	154231	552019	261887	234775
AAR34607.1;ADI84065.1;AJY70941.1;BBA69755.1;BEH10778.1;QVW36446.1;UAC05260.1;UTG93897.1;WP_010941887.1;WP_014551552.1;WP_039645572.1	WP_010941887.1;WP_014551552.1;WP_039645572.1;BEH10778.1;UTG93897.1;UAC05260.1;QVW36446.1;BBA69755.1;AJY70941.1;ADI84065.1;AAR34607.1	Cyclic;MULTISPECIES:;histidine;response	1.14155	0.166753	0.970495	0	0	1000000	270254	355991	1110000	1760000	717796
AAR34608.1;ADI84066.1;AJY70942.1;QVW36447.1;UAC05261.1;UTG93898.1;WP_010941888.1	UTG93898.1;UAC05261.1;QVW36447.1;AJY70942.1;ADI84066.1;AAR34608.1;WP_010941888.1	hypothetical	0.126654	0.744248	0.981924	0	0	1680000	697260	1140000	1160000	1310000	1370000
AAR34610.2;ADI84068.1;QVW36449.1;UAC05263.1;UTG93900.1;WP_010941890.1	BEH10775.1;UTG93900.1;UAC05263.1;QVW36449.1;WP_010941890.1;AJY70944.1;AAR34610.2;ADI84068.1	peptidase,;signal	0.143267	0.63345	0.970495	0	0	863150	574788	734562	611266	1020000	768050
AAR34611.1;ADI84069.1;AJY70945.1;BBA69759.1;BEH10774.1;QVW36450.1;UAC05264.1;UTG93901.1	BEH10774.1;UTG93901.1;UAC05264.1;QVW36450.1;BBA69759.1;AJY70945.1;ADI84069.1;AAR34611.1	Glutamate;NADPH-dependent;archaeal-type;hypothetical	-0.827227	0.192957	0.970495	0	0	3480000	1570000	2260000	1390000	1160000	1570000
AAR34612.2;ADI84070.1;AJY70946.1;BBA69760.1;BEH10773.1;QVW36451.1;UAC05265.1;UTG93902.1;WP_010941892.1;WP_286350079.1	WP_286350079.1;WP_324312239.1;BEH10773.1;UTG93902.1;UAC05265.1;QVW36451.1;WP_010941892.1;BBA69760.1;AJY70946.1;AAR34612.2;ADI84070.1	NADPH-dependent;class;glutamine;hypothetical	-0.169925	0.758165	0.985743	0	0	4130000	1630000	2250000	3020000	1450000	2650000
AAR34613.1;ADI84071.1;AJY70947.1;QVW36452.1;UAC05266.1;UTG93903.1;WP_010941893.1;WP_014551553.1	WP_014551553.1;WP_324312237.1;WP_286350078.1;WP_119332274.1;WP_010941893.1;BEH10772.1;UTG93903.1;UAC05266.1;QVW36452.1;BBA69761.1;AJY70947.1;ADI84071.1;AAR34613.1	FAD-dependent;NAD(P)/FAD-dependent;NADPH-dependent;pyridine	-0.617651	0.364241	0.970495	0	0	5230000	2350000	2240000	2140000	2020000	2240000
AAR34615.1;ADI84073.1;AJY70949.1;BBA69763.1;QVW36454.1;UAC05268.1;UTG93905.1;WP_010941895.1;WP_119332276.1	WP_010941895.1;WP_119332276.1;UTG93905.1;UAC05268.1;QVW36454.1;BBA69763.1;AJY70949.1;ADI84073.1;AAR34615.1	4Fe-4S;Glutamate;NADPH-dependent;glutamate	-0.594995	0.310383	0.970495	0	0	4680000	2510000	2190000	2600000	1480000	2130000
AAR34618.1;ADI84077.1;AJY70952.1;QVW36457.1;UAC05271.1;UTG93908.1;WP_010941898.1	WP_324312232.1;WP_286350073.1;BEH10767.1;WP_119332278.1;WP_010941898.1;UTG93908.1;UAC05271.1;QVW36457.1;BBA69766.1;AJY70952.1;ADI84077.1;AAR34618.1	amino;aspartate;pyridoxal	0.0420864	0.485662	0.970495	0	0	64700000	59600000	61500000	66800000	64100000	60400000
AAR34620.1;ADI84079.1;AJY70954.1;QVW36459.1;UAC05273.1;UTG93910.1;WP_010941900.1;WP_014551554.1;WP_045668132.1	UTG93910.1;UAC05273.1;QVW36459.1;WP_010941900.1;WP_014551554.1;WP_045668132.1;AJY70954.1;ADI84079.1;AAR34620.1	16S;DNA;methyltransferase	-0.287582	0.659591	0.97248	1	1	154222	40435	157613	56729	105998	125879
AAR34621.1;ADI84080.1;QVW36460.1;UAC05274.1;WP_010941901.1	WP_010941901.1;UAC05274.1;QVW36460.1;ADI84080.1;AAR34621.1	class;ketose-1,6-bisphosphate	0.0629379	0.362514	0.970495	0	0	1020000	995108	1010000	1130000	1010000	1020000
AAR34627.1;ADI84086.1;UAC05280.1;UTG93917.1;WP_010941906.1;WP_014551556.1;WP_254278466.1	WP_324312220.1;BEH10758.1;WP_254278466.1;UTG93917.1;UAC05280.1;WP_214303028.1;QVW36466.1;WP_119332286.1;WP_014551556.1;WP_010941906.1;BBA69775.1;AJY70961.1;ADI84086.1;AAR34627.1	ATS1;choice-of-anchor	-0.170006	0.53401	0.970495	1	1	262586	402940	331658	292756	234222	359358
AAR34628.1;UAC05281.1;WP_010941907.1;WP_324312218.1	WP_324312218.1;UAC05281.1;WP_214303029.1;QVW36467.1;AAR34628.1;WP_010941907.1	copper;multicopper	-0.00913224	0.981584	1	0	0	438879	211983	502229	390881	311762	443172
AAR34632.2;ADI84091.2;AJY70966.1;BBA69780.1;BEH10753.1;QVW36471.1;UAC05285.1;UTG93922.1;WP_232008988.1;WP_235044988.1;WP_238525132.1;WP_286350060.1;WP_324312213.1	WP_286350060.1;WP_324312213.1;BEH10753.1;WP_238525132.1;WP_235044988.1;WP_232008988.1;UTG93922.1;UAC05285.1;QVW36471.1;BBA69780.1;AJY70966.1;AAR34632.2;ADI84091.2	MULTISPECIES:;SCO;hypothetical	0.0173321	0.980581	1	0	0	330586	894372	941400	517800	404741	1270000
AAR34633.1;ADI84092.1;AJY70967.1;QVW36472.1;UAC05286.1;UTG93923.1;WP_010941912.1;WP_235044989.1;WP_250546382.1	WP_250546382.1;WP_235044989.1;WP_010941912.1;WP_119332292.1;UTG93923.1;UAC05286.1;QVW36472.1;BBA69781.1;AJY70967.1;ADI84092.1;AAR34633.1	ABC;cytochrome	0.166381	0.574697	0.970495	1	1	379585	347051	578063	575552	417121	471512
AAR34635.2;ADI84094.1;AJY70969.1;BBA69783.1;BEH10750.1;QVW36474.1;UAC05288.1;UTG93925.1;WP_010941914.1;WP_119332294.1;WP_324312209.1	WP_324312209.1;BEH10750.1;UTG93925.1;UAC05288.1;QVW36474.1;WP_119332294.1;BBA69783.1;AJY70969.1;AAR34635.2;ADI84094.1;WP_010941914.1	hypothetical	-0.631893	0.300366	0.970495	0	0	313107	453558	714588	196879	276154	482863
AAR34636.2;ADI84095.1;AJY70970.1;BBA69784.1;QVW36475.1;UAC05289.1;UTG93926.1;WP_010941915.1;WP_014551561.1;WP_119332295.1	WP_119332295.1;WP_014551561.1;WP_010941915.1;WP_324312207.1;WP_286350056.1;BEH10749.1;UTG93926.1;UAC05289.1;QVW36475.1;BBA69784.1;AJY70970.1;AAR34636.2;ADI84095.1	ABC;FtsX-like;hypothetical	-0.200579	0.577674	0.970495	0	0	1870000	1260000	2340000	1930000	1680000	1150000
AAR34637.1;AJY70971.1;QVW36476.1;UAC05290.1;UTG93927.1;WP_010941916.1	WP_119332296.1;WP_014551562.1;WP_286350055.1;WP_010941916.1;WP_324312205.1;BEH10748.1;UTG93927.1;UAC05290.1;QVW36476.1;BBA69785.1;AJY70971.1;ADI84096.1;AAR34637.1	ABC	0.182882	0.718806	0.975021	0	0	1160000	787771	724974	1350000	1210000	473964
AAR34639.1;AJY70973.1;BBA69787.1;BEH10746.1;UAC05292.1;UTG93929.1;WP_045668137.1;WP_324312203.1	WP_324312203.1;WP_045668137.1;WP_014551564.1;BEH10746.1;UTG93929.1;UAC05292.1;QVW36478.1;BBA69787.1;AJY70973.1;ADI84098.1;AAR34639.1	RNA-binding;ribosome	-0.0374981	0.96135	1	0	0	461103	128935	213218	88636	313999	380012
AAR34643.1;ADI84102.1;UAC05296.1;UTG93933.1;WP_010941922.1	WP_045668141.1;WP_010941922.1;BEH10742.1;UTG93933.1;UAC05296.1;QVW36482.1;BBA69791.1;AJY70977.1;ADI84102.1;AAR34643.1	signal	0.241301	0.250111	0.970495	0	0	14800000	10900000	12200000	12400000	16200000	16200000
AAR34649.1;ADI84108.1;AJY70983.1;QVW36488.1;UAC05302.1;UTG93939.1;WP_010941928.1;WP_420804625.1	WP_420804625.1;WP_416373132.1;WP_414973555.1;WP_324312193.1;WP_010941928.1;BEH10738.1;UTG93939.1;UAC05302.1;QVW36488.1;BBA69797.1;AJY70983.1;ADI84108.1;AAR34649.1	carbamoyl;carbamyl-phosphate;glutamine-hydrolyzing	-0.719656	0.0511503	0.970495	0	0	2770000	1890000	2520000	1250000	1870000	1240000
AAR34650.1;ADI84109.1;AJY70984.1;QVW36923.1;UAC05796.1;UTG94429.1;WP_119332305.1;WP_193360266.1;WP_286350044.1	WP_286350044.1;WP_119332305.1;WP_193360266.1;UTG94429.1;UAC05796.1;QVW36923.1;AJY70984.1;ADI84109.1;AAR34650.1	MULTISPECIES:;radical	0.0490283	0.903717	0.9965	0	0	494273	720775	752906	642614	434670	958698
AAR34652.1;ADI84111.1;AJY70986.1;QVW36490.1;UAC05304.1;UTG93941.1;WP_010941931.1	WP_010941931.1;UTG93941.1;UAC05304.1;QVW36490.1;AJY70986.1;ADI84111.1;AAR34652.1	carbamoyl;carbamoyl-phosphate;carbamyl-phosphate	-0.13803	0.387068	0.970495	0	0	5000000	4670000	4030000	4570000	4360000	3520000
AAR34653.1;ADI84112.1;AJY70987.1;BBA69801.1;QVW36491.1;UAC05305.1;UTG93942.1;WP_010941932.1	BEH10734.1;UTG93942.1;UAC05305.1;QVW36491.1;WP_010941932.1;BBA69801.1;AJY70987.1;ADI84112.1;AAR34653.1	Transcription;transcription	0.0554931	0.77926	0.988715	0	0	1160000	824344	1220000	1210000	1010000	1110000
AAR34654.1;ADI84113.1;AJY70988.1;BBA69802.1;BEH10733.1;QVW36492.1;UAC05306.1;UTG93943.1;WP_010941933.1	BEH10733.1;UTG93943.1;UAC05306.1;QVW36492.1;WP_010941933.1;BBA69802.1;AJY70988.1;ADI84113.1;AAR34654.1	DUF1858;disulfide;hypothetical;protein	-1.01433	0.208819	0.970495	0	0	4200000	2830000	1440000	1790000	1500000	903142
AAR34658.1;ADI84117.1;QVW36496.1;UAC05310.1;UTG93947.1;WP_010941937.1;WP_014551569.1;WP_254278472.1	WP_010941937.1;WP_014551569.1;WP_254278472.1;UTG93947.1;UAC05310.1;QVW36496.1;ADI84117.1;AAR34658.1	alginate;outer	0.813224	0.357722	0.970495	0	0	195211	328530	468262	521846	970148	251088
AAR34667.1;ADI84126.1;AJY71001.1;BBA69815.1;BEH10720.1;QVW36505.1;UAC05319.1;UTG93956.1;WP_010941946.1;WP_119332316.1;WP_286350028.1	WP_010941946.1;WP_119332316.1;WP_286350028.1;BEH10720.1;UTG93956.1;UAC05319.1;QVW36505.1;BBA69815.1;AJY71001.1;ADI84126.1;AAR34667.1	MULTISPECIES:;Response;chemotaxis;response	0.139024	0.80639	0.990742	1	0	147963	78557	283779	165339	222127	174455
AAR34669.1;ADI84128.1;AJY71002.1;BBA69817.1;QVW36507.1;UAC05320.1;UTG93957.1;WP_010941948.1;WP_014551573.1;WP_119332317.1	WP_014551573.1;WP_010941948.1;WP_119332317.1;UTG93957.1;UAC05320.1;QVW36507.1;BBA69817.1;AJY71002.1;ADI84128.1;AAR34669.1	LuxR;Transcriptional;helix-turn-helix;response	-0.583364	0.505439	0.970495	0	0	632566	738533	120334	554601	206049	234741
AAR34681.1;ADI84139.1;AJY71013.1;BBA69828.1;QVW36514.1;UAC05331.1;UTG93967.1;WP_010941959.1	WP_324312151.1;BEH10709.1;UTG93967.1;UAC05331.1;QVW36514.1;WP_010941959.1;BBA69828.1;AJY71013.1;ADI84139.1;AAR34681.1	NAD(P)-specific;NADP-specific;glutamate	-0.241586	0.563182	0.970495	0	0	32000000	20500000	15600000	23400000	18600000	15600000
AAR34683.1;ADI84141.1;AJY71014.1;BEH10707.1;QVW36516.1;UAC05333.1;UTG93969.1;WP_010941961.1;WP_014551582.1;WP_045668151.1	WP_045668151.1;WP_014551582.1;WP_010941961.1;BEH10707.1;UTG93969.1;UAC05333.1;QVW36516.1;AJY71014.1;ADI84141.1;AAR34683.1	ferritin;nonheme	0.0897369	0.851388	0.991407	0	0	336416	196760	440723	218638	483350	334412
AAR34685.1;ADI84143.1;AJY71016.1;BBA69832.1;QVW36518.1;UAC05335.1;UTG93971.1;WP_010941963.1;WP_119332330.1	WP_324312145.1;BEH10705.1;UTG93971.1;UAC05335.1;QVW36518.1;WP_119332330.1;BBA69832.1;AJY71016.1;ADI84143.1;AAR34685.1;WP_010941963.1	hypothetical	-1.27218	0.146795	0.970495	0	1	798247	510677	319585	258624	227644	187991
AAR34688.1;ADI84146.2;AJY71019.1;BBA69835.1;QVW36521.1;UAC05338.1;UTG93974.1;WP_041914005.1;WP_119332333.1;WP_164930425.1	WP_164930425.1;WP_119332333.1;WP_041914005.1;UTG93974.1;UAC05338.1;QVW36521.1;BBA69835.1;AJY71019.1;ADI84146.2;AAR34688.1	arsenosugar;hypothetical;radical	-0.0270186	0.96665	1	0	0	291072	400822	850932	369457	385585	759159
AAR34692.1;ADI84150.1;AJY71023.1;QVW36525.1;UAC05342.1;UTG93978.1;WP_010941970.1	WP_010941970.1;WP_119332336.1;UTG93978.1;UAC05342.1;QVW36525.1;BBA69839.1;AJY71023.1;ADI84150.1;AAR34692.1	chemotaxis;response	0.622323	0.171447	0.970495	0	0	1540000	1060000	1720000	1740000	2980000	1930000
AAR34693.1;ADI84152.1;AJY71024.1;QVW36526.1;UAC05343.1;UTG93979.1;WP_010941971.1	WP_119332337.1;WP_010941971.1;UTG93979.1;UAC05343.1;QVW36526.1;BBA69840.1;AJY71024.1;ADI84152.1;AAR34693.1	octaprenyl;polyprenyl	0.416406	0.153132	0.970495	0	0	10900000	8120000	12600000	11600000	16800000	13800000
AAR34695.1;ADI84154.1;AJY71026.1;QVW36528.1;UAC05345.1;UTG93981.1;WP_010941973.1	WP_010941973.1;UTG93981.1;UAC05345.1;QVW36528.1;AJY71026.1;ADI84154.1;AAR34695.1	histidine;sensor;two-component	0.449532	0.244785	0.970495	0	0	230920	160604	341372	290220	303483	407138
AAR34696.2;ADI84155.1;AJY71027.1;BBA69843.1;BEH10695.1;CBF90725.1;CBG02326.1;CBV04245.1;CBV15846.1;QVW36529.1;UAC05346.1;UTG93982.1;WP_041914006.1;WP_164930426.1;WP_167447380.1;WP_286350005.1	WP_286350005.1;WP_167447380.1;WP_164930426.1;WP_041914006.1;BEH10695.1;UTG93982.1;UAC05346.1;QVW36529.1;BBA69843.1;AJY71027.1;AAR34696.2;ADI84155.1;CBV15846.1;CBV04245.1;CBG02326.1;CBF90725.1	Fis;MULTISPECIES:;Transcriptional;sigma-54;sigma-54-dependent;unnamed	0.338771	0.219997	0.970495	0	0	960253	710269	1010000	1000000	1000000	1390000
AAR34697.1;ADI84156.1;AJY71028.1;BBA69844.1;QVW36530.1;UAC05347.1;UTG93983.1;WP_010941975.1	WP_010941975.1;UTG93983.1;UAC05347.1;QVW36530.1;BBA69844.1;AJY71028.1;ADI84156.1;AAR34697.1	Thiol-disulfide;TlpA;apocytochrome;thioredoxin	0.119515	0.352094	0.970495	0	0	8500000	8270000	7660000	8250000	8290000	10000000
AAR34700.1;ADI84159.1;AJY71031.1;BEH10690.1;QVW36533.1;UAC05350.1;UTG93986.1;WP_010941979.1;WP_039645435.1	WP_039645435.1;BEH10690.1;WP_010941979.1;UTG93986.1;UAC05350.1;QVW36533.1;AJY71031.1;ADI84159.1;AAR34700.1	MULTISPECIES:;RNA;RNA-binding	-0.113726	0.848069	0.991407	0	0	6520000	3390000	3810000	3040000	2680000	6960000
AAR34702.2;ADI84160.1;AJY71032.1;BBA69849.1;QVW36534.1;UAC05351.1;UTG93987.1;WP_010941980.1;WP_014551590.1;WP_119332342.1;WP_254278480.1	WP_324312123.1;BEH10689.1;WP_254278480.1;UTG93987.1;UAC05351.1;QVW36534.1;WP_119332342.1;WP_014551590.1;WP_010941980.1;BBA69849.1;AJY71032.1;AAR34702.2;ADI84160.1	ATP-dependent	0.0942998	0.744697	0.981924	0	0	296955	450653	311149	420801	427724	281748
AAR34703.1;ADI84161.1;AJY71033.1;BEH10688.1;QVW36535.1;UAC05352.1;UTG93988.1;WP_010941981.1	WP_010941981.1;BEH10688.1;UTG93988.1;UAC05352.1;QVW36535.1;AJY71033.1;ADI84161.1;AAR34703.1	homocysteine	-0.216938	0.540391	0.970495	0	0	171512	305231	340367	254293	210482	238258
AAR34706.2;ADI84164.1;AJY71036.1;BBA69853.1;BEH10685.1;QVW36538.1;UAC05355.1;UTG93991.1;WP_010941984.1;WP_119332346.1;WP_286349998.1	WP_119332346.1;WP_286349998.1;BEH10685.1;WP_010941984.1;UTG93991.1;UAC05355.1;QVW36538.1;BBA69853.1;AJY71036.1;AAR34706.2;ADI84164.1	Cobalt-zinc-cadmium;RND;TolC;metal	-0.711135	0.320134	0.970495	0	0	3270000	1470000	1410000	956661	1480000	1320000
AAR34707.1;ADI84165.2;AJY71037.1;QVW36539.1;UAC05356.1;UTG93992.1;WP_010941985.1	WP_119334056.1;WP_010941985.1;BEH10684.1;UTG93992.1;UAC05356.1;QVW36539.1;BBA69854.1;AJY71037.1;ADI84165.2;AAR34707.1	RND;efflux;metal	-0.682359	0.393506	0.970495	0	0	3710000	1030000	2000000	1090000	1700000	1410000
AAR34708.1;ADI84166.1;AJY71038.1;QVW36540.1;UAC05357.1;UTG93993.1;WP_010941986.1;WP_214303036.1	WP_214303036.1;WP_286349996.1;WP_119332347.1;WP_010941986.1;WP_324312115.1;BEH10683.1;UTG93993.1;UAC05357.1;QVW36540.1;BBA69855.1;AJY71038.1;ADI84166.1;AAR34708.1	CusA/CzcA;cation;efflux;metal	-0.554164	0.375626	0.970495	0	0	858183	282685	669759	518325	374769	340036
AAR34709.1;ADI84167.1;AJY71039.1;QVW36541.1;UAC05358.1;UTG93994.1;WP_010941987.1;WP_214303037.1;WP_254278481.1	WP_254278481.1;UTG93994.1;UAC05358.1;WP_214303037.1;QVW36541.1;AJY71039.1;ADI84167.1;AAR34709.1;WP_010941987.1	hypothetical	-0.90721	0.285553	0.970495	0	0	2870000	1550000	971365	673742	1650000	551017
AAR34710.1;ADI84168.1;AJY71040.1;BBA69857.1;BEH10681.1;QVW36542.1;UAC05359.1;UTG93995.1;WP_010941988.1;WP_014551591.1;WP_119332349.1;WP_286349994.1;WP_324312113.1	WP_014551591.1;WP_324312113.1;WP_119332349.1;WP_286349994.1;WP_010941988.1;BEH10681.1;UTG93995.1;UAC05359.1;QVW36542.1;BBA69857.1;AJY71040.1;ADI84168.1;AAR34710.1	C-type;IPT/TIG;MULTISPECIES:;cytochrome	-0.232702	0.448679	0.970495	0	0	479998	316051	560909	370995	383181	400649
AAR34713.2;UAC05361.1;WP_010941990.1	BEH10679.1;UTG93997.1;UAC05361.1;QVW36544.1;WP_119332351.1;BBA69859.1;WP_045668155.1;AJY71042.1;WP_010941990.1;AAR34713.2;ADI84170.1;WP_014551593.1	lipoprotein;lipoprotein,	0.234873	0.479966	0.970495	0	0	13000000	7150000	15200000	12700000	14300000	14600000
AAR34717.1;QVW36548.1;UAC05365.1;UTG94001.1;WP_010941994.1;WP_214303040.1	WP_014551595.1;WP_286349989.1;WP_214303040.1;WP_119332355.1;WP_010941994.1;WP_324312106.1;BEH10675.1;UTG94001.1;UAC05365.1;QVW36548.1;BBA69863.1;AJY71046.1;ADI84174.1;AAR34717.1	ABC	-0.4277	0.544258	0.970495	0	0	1710000	642236	665441	559640	827402	856438
AAR34721.1;AJY71764.1;UAC05369.1;UTG94005.1;WP_010941998.1	WP_010941998.1;BEH10671.1;WP_014551599.1;UTG94005.1;UAC05369.1;BBA69867.1;AJY71764.1;ADI84179.1;AAR34721.1	RrF2;Rrf2;winged	0.108149	0.530565	0.970495	0	0	2180000	2320000	2180000	2700000	1950000	2550000
AAR34722.1;UAC05370.1;WP_010941999.1	WP_119332359.1;WP_014551600.1;WP_010941999.1;WP_324312097.1;WP_286349985.1;BEH10670.1;WP_254278483.1;UTG94006.1;UAC05370.1;BBA69868.1;AJY71763.1;ADI84180.1;AAR34722.1	sulfate	0.0853915	0.640438	0.972164	0	0	8610000	7750000	6600000	8840000	8830000	6690000
AAR34723.2;AJY71762.1;BBA69869.1;BEH10669.1;UAC05371.1;UTG94007.1;WP_010942000.1;WP_119332360.1;WP_254278484.1;WP_286349984.1;WP_324312095.1	WP_324312095.1;WP_286349984.1;WP_254278484.1;WP_119332360.1;WP_010942000.1;BEH10669.1;UTG94007.1;UAC05371.1;BBA69869.1;AJY71762.1;AAR34723.2	Sulfate;sulfate	0.0493567	0.910555	0.999308	0	0	749054	1050000	579736	1180000	573884	707696
AAR34725.1;UAC05373.1;WP_010942002.1	WP_286349983.1;WP_014551602.1;WP_010942002.1;WP_119332361.1;BEH10667.1;UTG94009.1;UAC05373.1;BBA69871.1;AJY71760.1;ADI84183.1;AAR34725.1	sulfate;sulfate/molybdate	-0.296552	0.0618488	0.970495	0	0	9090000	9780000	9870000	7210000	8870000	7320000
AAR34726.1;BEH10666.1;UAC05374.1;WP_010942003.1	BEH10666.1;UAC05374.1;WP_010942003.1;AAR34726.1	MULTISPECIES:;molybdopterin-synthase;thiamin	-0.0214975	0.953505	1	0	0	5310000	2530000	4330000	4940000	3810000	3240000
AAR34727.1;UAC05375.1;WP_010942004.1	WP_324312087.1;WP_010942004.1;WP_286349982.1;BEH10665.1;UAC05375.1;AAR34727.1	4Fe-4S;sulfite	-0.276589	0.672248	0.973029	0	0	1670000	2400000	622562	833901	1790000	1250000
AAR34733.1;AJY71757.1;BBA69874.1;UAC05381.1;WP_010942008.1	WP_010942008.1;UAC05381.1;BBA69874.1;AJY71757.1;AAR34733.1	hypothetical;nucleotide	0.525738	0.233607	0.970495	0	0	658324	361418	703163	699229	671185	1110000
AAR34736.1;UAC05384.1;WP_010942011.1;pdb|8IN8|B;pdb|8JKZ|A;pdb|8JL0|A;pdb|8K87|B;pdb|8K87|G;pdb|8K88|B;pdb|8Y7Z|A;pdb|8Y80|A;pdb|8Y80|E;pdb|8Y80|I;pdb|8Y80|M;pdb|8Y82|A;pdb|8Y82|E;pdb|8Y82|I;pdb|8Y82|M	WP_010942011.1;pdb|8Y82|M;pdb|8Y82|I;pdb|8Y82|E;pdb|8Y82|A;pdb|8Y80|M;pdb|8Y80|I;pdb|8Y80|E;pdb|8Y80|A;pdb|8Y7Z|A;pdb|8K88|B;pdb|8K87|G;pdb|8K87|B;pdb|8JL0|A;pdb|8JKZ|A;pdb|8IN8|B;UAC05384.1;AAR34736.1	Chain;SIR2;Sir2	0.545569	0.159364	0.970495	0	0	1270000	1120000	1570000	1450000	2450000	1880000
AAR34737.1;UAC05385.1;WP_010942012.1;pdb|8IN8|C;pdb|8JKZ|B;pdb|8JL0|B;pdb|8K87|A;pdb|8K87|F;pdb|8K88|A;pdb|8Y7Z|B;pdb|8Y80|B;pdb|8Y80|F;pdb|8Y80|J;pdb|8Y80|N;pdb|8Y82|B;pdb|8Y82|F;pdb|8Y82|J;pdb|8Y82|N	pdb|8Y82|N;pdb|8Y82|J;pdb|8Y82|F;pdb|8Y82|B;pdb|8Y80|N;pdb|8Y80|J;pdb|8Y80|F;pdb|8Y80|B;pdb|8Y7Z|B;pdb|8K88|A;pdb|8K87|F;pdb|8K87|A;pdb|8JL0|B;pdb|8JKZ|B;pdb|8IN8|C;UAC05385.1;AAR34737.1;WP_010942012.1	Chain;Piwi;argonaute/piwi;nuclease	-0.0554443	0.875124	0.995781	0	0	1210000	1880000	2480000	2040000	1880000	1440000
AAR34740.1;UAC05388.1;WP_010942015.1	WP_010942015.1;UAC05388.1;AAR34740.1	HNH	0.875467	0.324801	0.970495	0	0	869245	695659	988069	983688	1040000	2660000
AAR34741.1;UAC05389.1;WP_235044993.1	WP_235044993.1;UAC05389.1;AAR34741.1	restriction;type	-0.607216	0.314447	0.970495	0	0	420347	498788	905529	346357	579675	271791
AAR34746.1;ADI84197.1;AJY71744.1;BBA69881.1;QVW36557.1;UAC05392.1;UTG94023.1;WP_010942020.1;WP_014551614.1;WP_119332370.1;WP_214303046.1;WP_324312068.1	WP_324312068.1;WP_214303046.1;WP_119332370.1;WP_014551614.1;WP_010942020.1;WP_286349973.1;BEH10649.1;UTG94023.1;UAC05392.1;QVW36557.1;BBA69881.1;AJY71744.1;ADI84197.1;AAR34746.1	General;aldo/keto;oxidoreductase,	0.662992	0.258164	0.970495	0	0	500606	232028	354791	315120	648217	758451
AAR34747.1;ADI84198.1;AJY71743.1;QVW36558.1;UAC05393.1;UTG94024.1;WP_010942021.1	UTG94024.1;UAC05393.1;QVW36558.1;WP_010942021.1;AJY71743.1;ADI84198.1;AAR34747.1	NADH:flavin;NADPH-dependent;oxidoreductase	-0.15056	0.332178	0.970495	0	0	2920000	2560000	2290000	2330000	2090000	2580000
AAR34748.1;ADI84199.1;AJY71742.1;QVW36559.1;UAC05394.1;WP_010942022.1;WP_214303047.1;pdb|3PDU|A;pdb|3PDU|B;pdb|3PDU|C;pdb|3PDU|D;pdb|3PDU|E;pdb|3PDU|F;pdb|3PDU|G;pdb|3PDU|H	WP_214303047.1;WP_286349971.1;WP_010942022.1;pdb|3PDU|H;pdb|3PDU|G;pdb|3PDU|F;pdb|3PDU|E;pdb|3PDU|D;pdb|3PDU|C;pdb|3PDU|B;pdb|3PDU|A;BEH10647.1;WP_119332372.1;UAC05394.1;QVW36559.1;BBA69883.1;AJY71742.1;ADI84199.1;AAR34748.1	3-hydroxyisobutyrate;Chain;NAD(P)-dependent;glyoxalate/3-oxopropanoate/4-oxobutanoate	-0.496001	0.178966	0.970495	0	0	3600000	2710000	2180000	2120000	1790000	2110000
AAR34752.1;ADI84203.1;AJY71739.1;BBA69885.1;QVW36562.1;UAC05397.1;UTG94028.1;WP_010942025.1;WP_119332374.1	WP_324312058.1;WP_286349967.1;BEH10644.1;UTG94028.1;UAC05397.1;QVW36562.1;WP_119332374.1;WP_010942025.1;BBA69885.1;AJY71739.1;ADI84203.1;AAR34752.1	DUF169;hypothetical;protein	0.200153	0.26203	0.970495	0	0	2020000	1480000	2010000	1970000	2160000	2200000
AAR34753.1;ADI84204.1;CAY35643.1;UAC05398.1;WP_010942026.1	WP_214303048.1;WP_119332375.1;WP_010942026.1;WP_286349966.1;BEH10643.1;UTG94029.1;UAC05398.1;QVW36563.1;BBA69886.1;AJY71738.1;ADI84204.1;AAR34753.1;CAY35643.1	enoyl-CoA;unnamed	-0.403163	0.178137	0.970495	0	0	3500000	2440000	3740000	2780000	2450000	2090000
AAR34755.1;ADI84206.1;BBA69888.1;QVW36565.1;UAC05400.1;WP_010942028.1;WP_014551616.1	WP_286349964.1;WP_254278494.1;WP_014551616.1;WP_010942028.1;BEH10641.1;UTG94031.1;UAC05400.1;QVW36565.1;BBA69888.1;AJY71736.1;ADI84206.1;AAR34755.1	Ferric;Fur;ferric;transcriptional	0.39992	0.258309	0.970495	0	0	644883	700038	621095	771648	1130000	692381
AAR34756.1;BEH10640.1;UAC05401.1;WP_010942029.1;WP_235045027.1;WP_324312054.1;WP_349256845.1;WP_350284130.1	WP_350284130.1;WP_349256845.1;WP_324312054.1;WP_254278570.1;WP_250546406.1;WP_235045027.1;WP_119332377.1;WP_014551617.1;WP_010942029.1;BEH10640.1;UTG94032.1;UAC05401.1;QVW36566.1;BBA69889.1;AJY71735.1;ADI84207.1;AAR34756.1	ferrous	0.0723307	0.635066	0.970495	0	0	1530000	1150000	1210000	1350000	1310000	1430000
AAR34758.1;ADI84209.1;AJY71733.1;QVW36567.1;UAC05402.1;UTG94033.1;WP_010942031.1;WP_324312052.1	WP_010942031.1;WP_324312052.1;UTG94033.1;UAC05402.1;QVW36567.1;WP_119332379.1;BBA69891.1;AJY71733.1;ADI84209.1;AAR34758.1	iron/manganese-dependent;metal-dependent;transcriptional	0.251406	0.334951	0.970495	0	0	3390000	3100000	2230000	3130000	4190000	3060000
AAR34762.1;ADI84213.1;UAC05406.1	UAC05406.1;ADI84213.1;AAR34762.1	CRISPR;type	-0.406291	0.207158	0.970495	1	0	729617	469382	706734	553581	519098	365313
AAR34763.1;ADI84214.1;CBL74460.1;UAC05407.1;WP_010942036.1	WP_010942036.1;UAC05407.1;ADI84214.1;AAR34763.1;CBL74460.1	CRISPR;type;unnamed	-0.686246	0.0630856	0.970495	0	0	2080000	1420000	1810000	1030000	1060000	1210000
AAR34770.1;ADI84234.1;UAC05414.1;UTG94046.1;WP_010942043.1;WP_014551620.1;WP_254278496.1	WP_324312043.1;WP_286349951.1;BEH10624.1;WP_254278496.1;UTG94046.1;UAC05414.1;WP_014551620.1;WP_010942043.1;ADI84234.1;AAR34770.1	choice-of-anchor;laccase	-0.233017	0.498538	0.970495	0	0	10100000	6210000	5950000	6840000	5840000	6260000
AAR34773.1;ADI84237.1;QVW36582.1;UAC05417.1;UTG94049.1;WP_010942046.1	WP_324312038.1;BEH10621.1;UTG94049.1;UAC05417.1;QVW36582.1;WP_010942046.1;WP_119332384.1;BBA69896.1;AJY71716.1;ADI84237.1;AAR34773.1	ABC	-0.0820507	0.726396	0.975743	0	0	4360000	2840000	3110000	3120000	3200000	3420000
AAR34774.1;ADI84238.1;AJY71715.1;BBA69897.1;BEH10620.1;QVW36583.1;UAC05418.1;UTG94050.1;WP_010942047.1;WP_232008993.1	BEH10620.1;WP_232008993.1;WP_010942047.1;UTG94050.1;UAC05418.1;QVW36583.1;BBA69897.1;AJY71715.1;ADI84238.1;AAR34774.1	SCO;hypothetical;photosynthetic	-0.584963	0.172905	0.970495	0	0	3350000	3210000	2020000	2680000	1610000	1430000
AAR34776.1;ADI84242.1;AJY71712.1;QVW36586.1;UAC05421.1;UTG94053.1;WP_010942050.1;WP_045668442.1	WP_324312035.1;WP_286349948.1;BEH10617.1;UTG94053.1;UAC05421.1;QVW36586.1;WP_119332388.1;WP_010942050.1;WP_045668442.1;BBA69900.1;AJY71712.1;ADI84242.1;AAR34776.1	DNA	0.139641	0.682619	0.973029	0	0	2420000	1820000	3730000	3150000	2710000	2920000
AAR34778.1;ADI84244.1;AJY71710.1;BBA69902.1;QVW36588.1;UAC05423.1;UTG94055.1;WP_010942052.1;WP_119332390.1	WP_010942052.1;WP_286349946.1;BEH10615.1;WP_119332390.1;UTG94055.1;UAC05423.1;QVW36588.1;BBA69902.1;AJY71710.1;ADI84244.1;AAR34778.1	23S;RNA;Ribosomal;pseudouridine;rRNA	-0.322958	0.299992	0.970495	0	0	1460000	1270000	1880000	1230000	1550000	905367
AAR34783.1;ADI84248.2;AJY71996.1;QVW36928.1;UAC05801.1;UTG94434.1;WP_010942056.1;WP_254278571.1	WP_254278571.1;WP_010942056.1;WP_286349942.1;BEH10612.1;WP_232008995.1;UTG94434.1;UAC05801.1;QVW36928.1;BBA69907.1;AJY71996.1;ADI84248.2;AAR34783.1	ATPase;MRP-like;Mrp/NBP35	-0.279521	0.559876	0.970495	0	0	807927	600793	1390000	831447	763189	711130
AAR34790.1;ADI84255.1;AJY71703.1;BBA69915.1;QVW36597.1;UAC05432.1;UTG94064.1;WP_010942063.1;WP_119332401.1	WP_119332401.1;WP_010942063.1;UTG94064.1;UAC05432.1;QVW36597.1;BBA69915.1;AJY71703.1;ADI84255.1;AAR34790.1	Chemotaxis;chemotaxis;response	-0.0257554	0.937328	1	0	0	793283	615858	836160	456943	872740	875890
AAR34791.2;ADI84256.1;AJY71702.1;QVW36598.1;UAC05433.1;UTG94065.1;WP_010942064.1;WP_045668440.1	WP_045668440.1;WP_119332402.1;WP_010942064.1;WP_324312015.1;UTG94065.1;UAC05433.1;QVW36598.1;BBA69916.1;AJY71702.1;AAR34791.2;ADI84256.1	4Fe-4S;FeS-binding;iron-sulfur	-0.073596	0.787672	0.988936	0	0	2100000	2060000	1470000	1950000	1290000	2110000
AAR34796.1;ADI84261.1;AJY71697.1;BBA69922.1;BEH10592.1;QVW36603.1;UAC05438.1;UTG94070.1;WP_010942069.1;WP_045668439.1;WP_119332408.1	WP_119332408.1;WP_045668439.1;WP_010942069.1;BEH10592.1;UTG94070.1;UAC05438.1;QVW36603.1;BBA69922.1;AJY71697.1;ADI84261.1;AAR34796.1	DNA;MULTISPECIES:;metallophosphoesterase;nuclease;putative	0.267843	0.378005	0.970495	0	0	131062	163830	181260	192874	142099	238317
AAR34797.1;ADI84262.1;AJY71696.1;BBA69923.1;BEH10591.1;QVW36604.1;UAC05439.1;UTG94071.1;WP_010942070.1;WP_045668438.1;WP_119332409.1;WP_214303052.1;WP_286349922.1	WP_045668438.1;WP_010942070.1;WP_214303052.1;WP_286349922.1;WP_119332409.1;BEH10591.1;UTG94071.1;UAC05439.1;QVW36604.1;BBA69923.1;AJY71696.1;ADI84262.1;AAR34797.1	AAA;ATP-binding;DNA;MULTISPECIES:;hypothetical;nuclease	-0.720884	0.299155	0.970495	0	0	586125	1670000	1340000	469707	1160000	552154
AAR34799.1;ADI84264.2;AJY71694.1;QVW36606.1;UAC05441.1;UTG94073.1;WP_010942072.1	UTG94073.1;UAC05441.1;QVW36606.1;WP_010942072.1;AJY71694.1;ADI84264.2;AAR34799.1	DUF4124;hypothetical;protein	0.257477	0.485583	0.970495	0	0	3460000	1850000	2060000	3490000	3050000	2270000
AAR34801.1;ADI84266.1;AJY71692.1;BBA69927.1;QVW36608.1;UAC05443.1;UTG94075.1;WP_010942074.1	WP_286349919.1;BEH10587.1;WP_010942074.1;UTG94075.1;UAC05443.1;QVW36608.1;BBA69927.1;AJY71692.1;ADI84266.1;AAR34801.1	ATP-binding;Serine-protein;anti-sigma	0.260362	0.283861	0.970495	0	0	173936	138222	219885	238552	192508	206210
AAR34802.1;ADI84267.1;AJY71691.1;BBA69928.1;QVW36609.1;UAC05444.1;UTG94076.1;WP_010942075.1	WP_010942075.1;WP_286349918.1;BEH10586.1;UTG94076.1;UAC05444.1;QVW36609.1;BBA69928.1;AJY71691.1;ADI84267.1;AAR34802.1	Anti-sigma-B;STAS;anti-anti-sigma	0.0270755	0.921155	1	0	0	2160000	2080000	3150000	1960000	2840000	2730000
AAR34806.1;ADI84271.1;AJY71686.1;QVW36613.1;UAC05448.1;UTG94080.1;WP_010942079.1;WP_045668437.1	WP_045668437.1;WP_010942079.1;WP_119332414.1;UTG94080.1;UAC05448.1;QVW36613.1;BBA69932.1;AJY71686.1;ADI84271.1;AAR34806.1	TPR;hypothetical;tetratricopeptide	0.020865	0.912713	0.999308	0	0	1250000	893032	1230000	1180000	1250000	992169
AAR34807.1;ADI84272.1;AJY71685.1;BBA69933.1;QVW36614.1;UAC05449.1;UTG94081.1;WP_010942080.1;WP_119332415.1	WP_324311999.1;BEH10581.1;UTG94081.1;UAC05449.1;QVW36614.1;WP_119332415.1;WP_010942080.1;BBA69933.1;AJY71685.1;ADI84272.1;AAR34807.1	Oligopeptide-binding;peptide;peptide-binding	0.206222	0.453496	0.970495	0	0	523008	368162	373610	590323	385525	483282
AAR34810.1;ADI84275.1;AJY71682.1;BEH10578.1;QVW36617.1;UAC05452.1;UTG94084.1;WP_010942083.1;WP_045668436.1;WP_324311992.1	WP_324311992.1;BEH10578.1;UTG94084.1;UAC05452.1;QVW36617.1;WP_119332418.1;BBA69936.1;WP_045668436.1;AJY71682.1;ADI84275.1;AAR34810.1;WP_010942083.1	hypothetical	0.199618	0.60557	0.970495	0	0	347910	532466	726875	771542	614184	460032
AAR34811.1;ADI84276.1;AJY71681.1;BBA69937.1;BEH10577.1;QVW36618.1;UAC05453.1;UTG94085.1;WP_010942084.1;WP_119332419.1;WP_324311990.1	pdb|3C37|B;pdb|3C37|A;WP_119332419.1;WP_010942084.1;WP_324311990.1;BEH10577.1;UTG94085.1;UAC05453.1;QVW36618.1;BBA69937.1;AJY71681.1;ADI84276.1;AAR34811.1	Beta-barrel;M48;peptidase	0.111217	0.542512	0.970495	0	0	746269	998809	1080000	1030000	941478	1080000
AAR34812.1;ADI84277.1;AJY71680.1;QVW36619.1;UAC05454.1;UTG94086.1;WP_010942085.1	WP_010942085.1;UTG94086.1;UAC05454.1;QVW36619.1;AJY71680.1;ADI84277.1;AAR34812.1	ATP-binding;ATPase	0.310165	0.32161	0.970495	0	0	731778	887993	773157	1060000	706871	1200000
AAR34816.1;ADI84281.1;AJY71677.1;BBA69941.1;BEH10573.1;QVW36621.1;UAC05456.1;UTG94088.1;WP_010942088.1;WP_119332423.1;WP_214303053.1;WP_286349908.1	WP_119332423.1;WP_010942088.1;WP_214303053.1;WP_286349908.1;BEH10573.1;UTG94088.1;UAC05456.1;QVW36621.1;BBA69941.1;AJY71677.1;ADI84281.1;AAR34816.1	Carbonic;MULTISPECIES:;carbonic	0.117247	0.853793	0.991528	0	0	142789	353979	639098	520380	286315	425337
AAR34819.2;CBF58563.1;CBF90645.1;CBU83968.1;CBV04165.1;UAC05459.1;UTG94090.1;WP_010942091.1;WP_161598788.1;WP_254278500.1	WP_161598788.1;WP_214303055.1;WP_119332426.1;WP_254278500.1;WP_010942091.1;UTG94090.1;UAC05459.1;QVW36624.1;BBA69944.1;AAR34819.2;CBV04165.1;CBU83968.1;CBF90645.1;CBF58563.1	TonB-dependent;ligand-gated;unnamed	0.332492	0.460683	0.970495	0	0	599444	451818	413733	552837	416387	875478
AAR34820.1;ADI84285.1;AJY71674.1;BEH10569.1;QVW36625.1;UAC05460.1;UTG94091.1;WP_010942092.1;WP_324310626.1	WP_324310626.1;BEH10569.1;UTG94091.1;UAC05460.1;QVW36625.1;WP_119332427.1;WP_010942092.1;BBA69945.1;AJY71674.1;ADI84285.1;AAR34820.1	geopeptide;radical	-0.379809	0.0195451	0.948398	0	0	1360000	1510000	1580000	1160000	1080000	1180000
AAR34822.1;ADI84287.1;AJY71672.1;QVW36627.1;UAC05462.1;UTG94093.1;WP_010942094.1	WP_286349903.1;WP_119332429.1;WP_010942094.1;WP_324310623.1;BEH10567.1;UTG94093.1;UAC05462.1;QVW36627.1;BBA69947.1;AJY71672.1;ADI84287.1;AAR34822.1	PHP;metal-dependent;phosphoesterase	0.0819537	0.925787	1	0	0	224399	1790000	888762	559745	1690000	823107
AAR34824.2;ADI84289.1;AJY71670.1;QVW36629.1;UAC05464.1;UTG94095.1;WP_010942096.1	WP_010942096.1;UTG94095.1;UAC05464.1;QVW36629.1;AJY71670.1;AAR34824.2;ADI84289.1	endonuclease	0.199702	0.684302	0.973029	0	0	611377	1250000	662643	568738	1170000	1160000
AAR34825.1;ADI84290.1;AJY71669.1;BBA69950.1;QVW36630.1;UAC05465.1;UTG94096.1;WP_010942097.1	WP_010942097.1;UTG94096.1;UAC05465.1;QVW36630.1;BBA69950.1;AJY71669.1;ADI84290.1;AAR34825.1	2-(hydroxymethyl)glutarate;3-hydroxyisobutyrate;NAD(P)-dependent;glyoxalate/3-oxopropanoate/4-oxobutanoate	0.513058	0.47615	0.970495	0	0	11900000	2720000	3480000	9710000	7240000	8880000
AAR34828.1;ADI84293.1;AJY71666.1;BBA69953.1;QVW36633.1;UAC05468.1;UTG94099.1;WP_010942100.1;WP_119332433.1	WP_286349897.1;WP_119332433.1;WP_010942100.1;WP_324310614.1;BEH10561.1;UTG94099.1;UAC05468.1;QVW36633.1;BBA69953.1;AJY71666.1;ADI84293.1;AAR34828.1	Poly-beta-1,6-N-acetyl-D-glucosamine;glycosyl;glycosyltransferase;glycosyltransferase,	-0.404997	0.483281	0.970495	1	0	265783	152586	250627	232404	223042	49805
AAR34830.1;ADI84295.1;AJY71664.1;UAC05470.1;UTG94101.1;WP_010942102.1;WP_250546389.1	WP_250546389.1;UTG94101.1;UAC05470.1;AJY71664.1;ADI84295.1;AAR34830.1;WP_010942102.1	hypothetical;tetratricopeptide	0.23178	0.714048	0.974322	0	0	1450000	567504	398730	884736	822606	1130000
AAR34832.1;ADI84297.1;AJY71662.1;QVW36636.1;UAC05472.1;UTG94103.1;WP_010942104.1;WP_045668433.1	WP_324310606.1;WP_286349893.1;WP_010942104.1;WP_045668433.1;BEH10557.1;UTG94103.1;UAC05472.1;QVW36636.1;AJY71662.1;ADI84297.1;AAR34832.1	TPR;hypothetical;tetratricopeptide	0.0695509	0.804973	0.990742	0	0	1050000	1040000	1510000	987804	1240000	1550000
AAR34836.1;ADI84301.1;AJY71658.1;QVW36640.1;UAC05476.1;UTG94107.1;WP_010942108.1;WP_045668431.1;WP_254278502.1	WP_254278502.1;WP_045668431.1;WP_010942108.1;UTG94107.1;UAC05476.1;QVW36640.1;AJY71658.1;ADI84301.1;AAR34836.1	23S	0.0614005	0.906547	0.997638	0	0	1680000	3490000	1270000	1950000	2680000	2090000
AAR34839.1;ADI84304.1;UAC05479.1;UTG94110.1;WP_010942111.1	BEH10550.1;UTG94110.1;UAC05479.1;WP_214303056.1;QVW36643.1;WP_119332444.1;WP_010942111.1;BBA69964.1;AJY71655.1;ADI84304.1;AAR34839.1	NADP-dependent;isocitrate	0.0658021	0.456436	0.970495	0	0	67700000	67500000	59800000	69800000	71400000	62900000
AAR34841.1;ADI84306.1;AJY71653.1;BBA69966.1;BEH10548.1;QVW36645.1;UAC05481.1;UTG94112.1;WP_010942113.1	WP_010942113.1;BEH10548.1;UTG94112.1;UAC05481.1;QVW36645.1;BBA69966.1;AJY71653.1;ADI84306.1;AAR34841.1	2-oxoglutarate:ferredoxin;4Fe-4S;MULTISPECIES:;hypothetical;tungsten	-0.33116	0.334584	0.970495	0	0	5690000	8910000	5780000	4680000	4860000	6660000
AAR34842.1;ADI84307.1;BEH10547.1;QVW36646.1;UAC05482.1;UTG94113.1	BEH10547.1;UTG94113.1;UAC05482.1;QVW36646.1;WP_119332445.1;BBA69967.1;AJY71652.1;ADI84307.1;AAR34842.1	2-oxoacid:acceptor;2-oxoglutarate:ferredoxin	0.0462766	0.761468	0.985743	0	0	102000000	79000000	85900000	94800000	100000000	80800000
AAR34843.1;ADI84308.1;AJY71651.1;BBA69968.1;BEH10546.1;QVW36647.1;UAC05483.1;UTG94114.1;WP_010942115.1	BEH10546.1;UTG94114.1;UAC05483.1;QVW36647.1;BBA69968.1;WP_010942115.1;AJY71651.1;ADI84308.1;AAR34843.1	2-oxoacid:ferredoxin;2-oxoglutarate;2-oxoglutarate:ferredoxin	-0.11616	0.586359	0.970495	0	0	47900000	51800000	41200000	53300000	40800000	35900000
AAR34844.1;ADI84309.1;BBA69969.1;BEH10545.1;QVW36648.1;UAC05484.1;UTG94115.1;WP_010942116.1	WP_010942116.1;BEH10545.1;UTG94115.1;UAC05484.1;QVW36648.1;pdb|3ON3|B;pdb|3ON3|A;BBA69969.1;AJY71650.1;ADI84309.1;AAR34844.1	2-oxoacid:acceptor;2-oxoglutarate:ferredoxin;MULTISPECIES:;Pyruvate	-0.0690704	0.800068	0.990681	0	0	52700000	56100000	38800000	59800000	43000000	37900000
AAR34846.1;ADI84311.1;AJY71648.1;QVW36650.1;UAC05486.1;UTG94117.1;WP_010942118.1	BEH10543.1;UTG94117.1;WP_232008996.1;UAC05486.1;QVW36650.1;BBA69971.1;AJY71648.1;ADI84311.1;AAR34846.1;WP_010942118.1	GTPase-activating;PATAN	-0.199082	0.402199	0.970495	0	0	2290000	2760000	2010000	2390000	2170000	1590000
AAR34851.1;ADI84316.1;AJY71643.1;BBA69976.1;BEH10538.1;QVW36655.1;UAC05491.1;UTG94122.1;WP_010942123.1;WP_045668421.1;WP_324310588.1	WP_045668421.1;WP_010942123.1;WP_324310588.1;BEH10538.1;UTG94122.1;UAC05491.1;QVW36655.1;BBA69976.1;AJY71643.1;ADI84316.1;AAR34851.1	LemA;hypothetical;lipoprotein	-0.259688	0.634159	0.970495	0	0	14600000	6890000	6070000	8200000	7520000	7300000
AAR34855.1;ADI84320.1;AJY71639.1;BBA69980.1;CBG09295.1;CBV22817.1;QVW36658.1;UAC05494.1;UTG94125.1;WP_010942127.1;WP_045668417.1	WP_045668417.1;WP_010942127.1;UTG94125.1;UAC05494.1;QVW36658.1;BBA69980.1;AJY71639.1;ADI84320.1;AAR34855.1;CBV22817.1;CBG09295.1	HlyD;Multidrug;RND;multidrug;unnamed	0.186277	0.341607	0.970495	0	0	806557	676503	956917	888298	837966	1050000
AAR34856.1;ADI84321.1;BEH10534.1;QVW36659.1;UAC05495.1;UTG94126.1;WP_010942128.1;WP_014551625.1;WP_286349876.1	WP_014551625.1;WP_010942128.1;WP_286349876.1;WP_324310578.1;BEH10534.1;WP_119332452.1;UTG94126.1;UAC05495.1;QVW36659.1;BBA69981.1;AJY71638.1;ADI84321.1;AAR34856.1	MULTISPECIES:;TolC;efflux	0.0480409	0.646419	0.972476	0	0	1500000	1320000	1610000	1460000	1490000	1630000
AAR34858.1;ADI84323.1;QVW36661.1;UAC05497.1;UTG94128.1;WP_010942130.1;WP_014551627.1;WP_254278503.1;WP_324310575.1	WP_324310575.1;WP_119332453.1;WP_286349875.1;WP_014551627.1;WP_254278503.1;WP_010942130.1;BEH10532.1;UTG94128.1;UAC05497.1;QVW36661.1;BBA69983.1;AJY71636.1;ADI84323.1;AAR34858.1	lytic;tetratricopeptide	0.287841	0.39779	0.970495	0	0	1730000	1090000	1120000	2050000	1340000	1420000
AAR34859.1;ADI84324.2;QVW36931.1;UAC05804.1;UTG94437.1;WP_010942131.1	WP_010942131.1;UTG94437.1;UAC05804.1;QVW36931.1;AJY71994.1;ADI84324.2;AAR34859.1	exoribonuclease;ribonuclease	-0.0624641	0.656041	0.97248	0	0	2710000	3130000	3600000	3010000	3050000	2980000
AAR34860.1;ADI84325.1;BBA69985.1;BEH10530.1;QVW36662.1;UAC05498.1;UTG94129.1;WP_119332454.1;WP_324310571.1	WP_324310571.1;BEH10530.1;WP_119332454.1;UTG94129.1;UAC05498.1;QVW36662.1;BBA69985.1;AJY71635.1;ADI84325.1;AAR34860.1	Sec-independent;twin-arginine	-0.13639	0.681588	0.973029	1	0	73994	120135	110541	74707	79739	122741
AAR34861.1;ADI84326.1;AJY71634.1;BEH10529.1;QVW36663.1;UAC05499.1;UTG94130.1;WP_010942133.1	BEH10529.1;UTG94130.1;WP_010942133.1;UAC05499.1;QVW36663.1;AJY71634.1;ADI84326.1;AAR34861.1	bifunctional;riboflavin	-0.572089	0.106676	0.970495	0	0	1050000	830370	680975	529182	717569	476118
AAR34862.2;ADI84327.2;AJY71633.1;BBA69987.1;QVW36664.1;UAC05500.1;UTG94131.1;WP_010942134.1;WP_119332456.1	WP_119332456.1;WP_010942134.1;UTG94131.1;UAC05500.1;QVW36664.1;BBA69987.1;AJY71633.1;ADI84327.2;AAR34862.2	flippase-like;hypothetical;lysylphosphatidylglycerol;membrane	-0.199782	0.603336	0.970495	0	0	472422	678174	790795	578744	356994	754597
AAR34863.1;ADI84328.1;AJY71632.1;BEH10527.1;QVW36665.1;UAC05501.1;UTG94132.1;WP_010942135.1;WP_286349871.1	WP_286349871.1;BEH10527.1;UTG94132.1;UAC05501.1;QVW36665.1;WP_010942135.1;AJY71632.1;ADI84328.1;AAR34863.1	DUF2723;membrane;polyprenyl-phospho-glycoside--protein	-0.4984	0.112517	0.970495	0	0	550801	704590	504486	529408	384193	332201
AAR34865.1;ADI84330.1;AJY71630.1;BBA69990.1;QVW36667.1;UAC05503.1;UTG94134.1;WP_010942137.1;WP_045668408.1;pdb|5ZFR|A;pdb|5ZFR|B;pdb|5ZFR|C	pdb|5ZFR|C;pdb|5ZFR|B;pdb|5ZFR|A;BEH10525.1;UTG94134.1;UAC05503.1;QVW36667.1;WP_045668408.1;WP_010942137.1;BBA69990.1;AJY71630.1;ADI84330.1;AAR34865.1	Chain;Type;type	0.0474787	0.632518	0.970495	0	0	1960000	1800000	1620000	1930000	1890000	1740000
AAR34866.1;ADI84331.1;QVW36668.1;UAC05504.1;UTG94135.1;WP_010942138.1	WP_119332459.1;WP_010942138.1;pdb|5ZFQ|B;pdb|5ZFQ|A;BEH10524.1;UTG94135.1;UAC05504.1;QVW36668.1;BBA69991.1;AJY71629.1;ADI84331.1;AAR34866.1	twitching;type	-0.0838881	0.651377	0.97248	0	0	4200000	3820000	5080000	3460000	4300000	4600000
AAR34867.1;ADI84332.1;AJY71628.1;BBA69992.1;BEH10523.1;QVW36669.1;UAC05505.1;UTG94136.1;WP_010942139.1;WP_119332460.1;WP_286349867.1	WP_010942139.1;WP_286349867.1;WP_119332460.1;BEH10523.1;UTG94136.1;UAC05505.1;QVW36669.1;BBA69992.1;AJY71628.1;ADI84332.1;AAR34867.1	MULTISPECIES:;Type;pilus;type	0.248182	0.0830741	0.970495	0	0	2830000	2810000	3310000	3250000	3510000	3870000
AAR34868.1;ADI84333.2;AJY71993.1;BBA69993.1;QVW36932.1;UAC05805.1;UTG94438.1;WP_010942140.1;WP_045668732.1;WP_119334060.1;WP_254278572.1	WP_324310643.1;WP_286352521.1;WP_119334060.1;WP_045668732.1;WP_254278572.1;WP_010942140.1;BEH10522.1;UTG94438.1;UAC05805.1;QVW36932.1;BBA69993.1;AJY71993.1;ADI84333.2;AAR34868.1	PAS;Sporulation;histidine;sensor;two-component	-0.0561867	0.826203	0.991407	0	0	278893	293592	255825	196378	339761	260532
AAR34869.1;ADI84334.1;BBA69994.1;CBF90726.1;CBG02327.1;CBV04246.1;CBV15847.1;UAC05506.1;UTG94137.1;WP_010942141.1;WP_119332461.1;WP_254278504.1	WP_214303058.1;WP_286349866.1;WP_119332461.1;WP_010942141.1;BEH10521.1;WP_254278504.1;UTG94137.1;UAC05506.1;QVW36670.1;BBA69994.1;AJY71627.1;ADI84334.1;AAR34869.1;CBV15847.1;CBV04246.1;CBG02327.1;CBF90726.1	Transcriptional;sigma-54;sigma-54-dependent;unnamed	0.433588	0.0614279	0.970495	0	0	1390000	1170000	1690000	1810000	1800000	2130000
AAR34870.1;ADI84335.2;BEH10520.1;UAC05507.1;WP_049786599.1;pdb|2M7G|A;pdb|6VK9|0;pdb|6VK9|2;pdb|6VK9|4;pdb|6VK9|A;pdb|6VK9|C;pdb|6VK9|E;pdb|6VK9|G;pdb|6VK9|I;pdb|6VK9|K;pdb|6VK9|M;pdb|6VK9|O;pdb|6VK9|Q;pdb|6VK9|S;pdb|6VK9|U;pdb|6VK9|W;pdb|6VK9|Y;pdb|7TGG|A	WP_049786599.1;pdb|7TGG|A;pdb|6VK9|4;pdb|6VK9|2;pdb|6VK9|0;pdb|6VK9|Y;pdb|6VK9|W;pdb|6VK9|E;pdb|6VK9|C;pdb|6VK9|M;pdb|6VK9|K;pdb|6VK9|I;pdb|6VK9|G;pdb|6VK9|U;pdb|6VK9|S;pdb|6VK9|Q;pdb|6VK9|O;pdb|6VK9|A;pdb|2M7G|A;BEH10520.1;UAC05507.1;ADI84335.2;AAR34870.1	Chain;MULTISPECIES:;geopilin;prepilin-type	1.03487	0.023117	0.948398	0	0	3400000	3170000	3240000	7690000	5800000	6610000
AAR34871.1;ADN78339.1;BEH10519.1;UAC05508.1;pdb|6VK9|1;pdb|6VK9|3;pdb|6VK9|5;pdb|6VK9|B;pdb|6VK9|D;pdb|6VK9|F;pdb|6VK9|H;pdb|6VK9|J;pdb|6VK9|L;pdb|6VK9|N;pdb|6VK9|P;pdb|6VK9|R;pdb|6VK9|T;pdb|6VK9|V;pdb|6VK9|X;pdb|6VK9|Z;pdb|7TGG|a	pdb|7TGG|a;pdb|6VK9|5;pdb|6VK9|3;pdb|6VK9|1;pdb|6VK9|Z;pdb|6VK9|X;pdb|6VK9|F;pdb|6VK9|N;pdb|6VK9|L;pdb|6VK9|J;pdb|6VK9|H;pdb|6VK9|V;pdb|6VK9|T;pdb|6VK9|R;pdb|6VK9|P;pdb|6VK9|B;pdb|6VK9|D;BEH10519.1;UAC05508.1;ADN78339.1;AAR34871.1	Chain;geopilin;hypothetical	0.677043	0.130547	0.970495	0	0	20600000	19400000	12600000	33500000	31500000	19100000
AAR34873.1;ADI84337.2;UAC05510.1;WP_010942145.1	WP_010942145.1;WP_286349864.1;BEH10517.1;UAC05510.1;ADI84337.2;AAR34873.1	ABC;membrane	-0.0773533	0.836982	0.991407	0	0	938739	667313	1330000	922380	710395	1150000
AAR34874.2;ADI84338.1;BEH10516.1;UAC05511.1;WP_010942146.1;WP_014551628.1	WP_014551628.1;BEH10516.1;UAC05511.1;AAR34874.2;ADI84338.1;WP_010942146.1	hypothetical	-0.0896773	0.68607	0.973029	0	0	954658	1020000	664063	790733	909431	779529
AAR34875.1;ADI84339.2;BEH10515.1;UAC05512.1;WP_010942147.1;WP_014551629.1	WP_014551629.1;WP_010942147.1;BEH10515.1;UAC05512.1;ADI84339.2;AAR34875.1	ABC;MULTISPECIES:	0.609281	0.0240666	0.948398	0	0	1270000	1410000	1830000	2430000	2010000	2440000
AAR34879.1;UAC05516.1;WP_010942151.1	WP_010942151.1;WP_014551632.1;UAC05516.1;ADI84343.1;AAR34879.1	ABC	0.281635	0.674466	0.973029	1	0	238878	152066	273509	172453	458498	176740
AAR34882.2;ADI84346.1;UAC05519.1;WP_010942154.1	UAC05519.1;WP_010942154.1;AAR34882.2;ADI84346.1	glycoside;hypothetical	1.03112	0.0226311	0.948398	0	0	709849	462580	633201	1200000	1020000	1470000
AAR34886.1;ADI84349.2;QVW36684.1;UAC05523.1;WP_010942159.1	WP_286349855.1;WP_324310543.1;WP_010942159.1;WP_254278516.1;BEH10506.1;UTG94152.1;UAC05523.1;QVW36684.1;ADI84349.2;AAR34886.1	FAD-dependent;hypothetical;protoporphyrinogen/coproporphyrinogen	-0.215652	0.580114	0.970495	0	0	1490000	1790000	2770000	1280000	1800000	2130000
AAR34887.1;ADN78342.1;QVW36685.1;UAC05524.1;WP_010942160.1	WP_010942160.1;UAC05524.1;QVW36685.1;ADN78342.1;AAR34887.1	MULTISPECIES:;SAM-dependent;class	0.270089	0.305716	0.970495	0	0	1320000	1590000	2190000	2070000	2100000	1980000
AAR34888.1;ADI84350.1;QVW36686.1;UAC05525.1;WP_010942161.1;WP_238525138.1;WP_250546392.1	WP_254278517.1;WP_010942161.1;WP_250546392.1;WP_238525138.1;UTG94439.1;UAC05525.1;QVW36686.1;ADI84350.1;AAR34888.1	ADP-heptose--lipopolysaccharide;glycosyltransferase	1.04955	0.0995809	0.970495	0	0	179915	193101	196697	279730	379399	520107
AAR34895.1;ADI84357.1;AJY71594.1;BBA70017.1;QVW36692.1;UAC05531.1;UTG94158.1	BEH10498.1;UTG94158.1;UAC05531.1;QVW36692.1;BBA70017.1;AJY71594.1;ADI84357.1;AAR34895.1	Integration;integration	-0.185477	0.365606	0.970495	0	0	10500000	10100000	8080000	9430000	9060000	6730000
AAR34899.1;ADI84361.1;AJY71590.1;BBA70021.1;QVW36696.1;UAC05534.1;UTG94162.1;WP_010942172.1;WP_394371624.1	WP_416373122.1;WP_394371624.1;WP_286349845.1;WP_010942172.1;BEH10494.1;UTG94162.1;UAC05534.1;QVW36696.1;BBA70021.1;AJY71590.1;ADI84361.1;AAR34899.1	RNA;sigma-70	0.0115772	0.985003	1	1	1	127990	317900	529786	222860	397294	363383
AAR34903.2;ADI84366.2;AJY71587.1;QVW36700.1;UAC05537.1;UTG94166.1;WP_235045002.1	WP_324310526.1;WP_235045002.1;WP_232008999.1;WP_286349841.1;BEH10490.1;UTG94166.1;UAC05537.1;QVW36700.1;BBA70025.1;AJY71587.1;AAR34903.2;ADI84366.2	PAS;histidine;hybrid;sensor	-0.270812	0.506317	0.970495	0	0	417414	286530	602068	386233	390655	305604
AAR34907.2;ADI84370.1;AJY71583.1;CBF91507.1;CBF93156.1;CBG04908.1;CBV05027.1;CBV06676.1;CBV18430.1;QVW36704.1;UAC05541.1;UTG94170.1;WP_010942180.1;WP_214303071.1;WP_254278519.1	WP_324310519.1;BEH10486.1;WP_254278519.1;UTG94170.1;UAC05541.1;WP_214303071.1;QVW36704.1;WP_119332485.1;WP_010942180.1;BBA70029.1;AJY71583.1;ADI84370.1;AAR34907.2;CBV06676.1;CBV18430.1;CBV05027.1;CBG04908.1;CBF93156.1;CBF91507.1	exodeoxyribonuclease;unnamed	0.308879	0.124893	0.970495	0	0	820581	848921	1070000	1260000	1150000	983544
AAR34908.1;ADI84371.1;AJY71582.1;UAC05542.1;UTG94171.1;WP_010942181.1;WP_014551633.1;WP_254278520.1	WP_286349838.1;WP_254278520.1;WP_214303072.1;WP_119332486.1;WP_014551633.1;WP_010942181.1;BEH10485.1;UTG94171.1;UAC05542.1;QVW36705.1;BBA70030.1;AJY71582.1;ADI84371.1;AAR34908.1	exodeoxyribonuclease	0.00875421	0.968344	1	0	0	757439	727734	804850	566977	901897	835087
AAR34909.1;ADI84372.1;AJY71581.1;BBA70031.1;BEH10484.1;QVW36706.1;UAC05543.1;UTG94172.1;WP_010942182.1;WP_119332487.1;WP_214303073.1;WP_254278521.1;WP_324310515.1	WP_324310515.1;WP_254278521.1;WP_214303073.1;WP_119332487.1;WP_010942182.1;BEH10484.1;UTG94172.1;UAC05543.1;QVW36706.1;BBA70031.1;AJY71581.1;ADI84372.1;AAR34909.1	RecBCD;exodeoxyribonuclease	0.548985	0.16832	0.970495	0	0	485754	256686	568135	508469	765615	643361
AAR34910.1;AJY71580.1;UAC05544.1;WP_010942183.1	WP_324310513.1;BEH10483.1;WP_254278522.1;UTG94173.1;WP_238525140.1;UAC05544.1;WP_214303074.1;QVW36707.1;WP_119332488.1;BBA70032.1;AJY71580.1;AAR34910.1;WP_010942183.1	hypothetical	-0.101519	0.771992	0.988632	0	0	2570000	3000000	2230000	2230000	3380000	1660000
AAR34911.1;ADI84374.1;AJY71579.1;BBA70033.1;BEH10482.1;QVW36708.1;UAC05545.1;UTG94174.1;WP_010942184.1;WP_119332489.1;WP_254278523.1;WP_286349835.1	WP_254278523.1;WP_286349835.1;WP_010942184.1;WP_324310511.1;WP_119332489.1;BEH10482.1;UTG94174.1;UAC05545.1;QVW36708.1;BBA70033.1;AJY71579.1;ADI84374.1;AAR34911.1	AAA;ATPase;MULTISPECIES:;hypothetical;peptidoglycan-binding	-0.108581	0.708715	0.974322	0	0	1100000	1130000	1770000	1180000	1150000	1380000
AAR34913.1;ADI84376.1;AJY71577.1;UAC05547.1;WP_010942186.1	WP_324310507.1;WP_254278525.1;WP_214303076.1;WP_119332491.1;WP_010942186.1;BEH10480.1;UTG94176.1;UAC05547.1;QVW36710.1;BBA70035.1;AJY71577.1;ADI84376.1;AAR34913.1	exodeoxyribonuclease	0.496856	0.204341	0.970495	0	0	1400000	1090000	2180000	2310000	1690000	2590000
AAR34922.2;ADI84384.1;AJY71568.1;BEH10468.1;QVW36718.1;UAC05555.1;UTG94190.1;WP_010942195.1;WP_286349825.1;WP_324310487.1	WP_324310487.1;WP_286349825.1;WP_010942195.1;BEH10468.1;UTG94190.1;UAC05555.1;QVW36718.1;AJY71568.1;AAR34922.2;ADI84384.1	MULTISPECIES:;ferritin;hypothetical;rubrerythrin	0.844063	0.0075349	0.875241	1	0	237864	172546	241995	441435	370535	359162
AAR34925.1;ADI84387.2;AJY71565.1;QVW36721.1;UAC05558.1;UTG94193.1;WP_235045006.1;WP_250546395.1	WP_250546395.1;WP_235045006.1;UTG94193.1;UAC05558.1;QVW36721.1;AJY71565.1;ADI84387.2;AAR34925.1	HAMP;SpoIIE;signal	0.226417	0.584569	0.970495	1	0	220595	530142	426188	347792	459781	569341
AAR34926.1;ADI84388.1;AJY71564.1;QVW36722.1;UAC05559.1;UTG94194.1;WP_010942199.1	UTG94194.1;UAC05559.1;QVW36722.1;WP_010942199.1;AJY71564.1;ADI84388.1;AAR34926.1	SiaB;hypothetical	0.098617	0.623602	0.970495	0	0	933047	967494	756467	1040000	754982	1050000
AAR34927.1;ADI84389.1;AJY71563.1;BBA70062.1;BEH10463.1;QVW36723.1;UAC05560.1;UTG94195.1;WP_010942200.1;WP_214303083.1;WP_324310479.1	WP_324310479.1;BEH10463.1;WP_214303083.1;UTG94195.1;UAC05560.1;QVW36723.1;BBA70062.1;WP_010942200.1;AJY71563.1;ADI84389.1;AAR34927.1	DUF1987;SiaC;hypothetical;protein	0.41866	0.354424	0.970495	0	0	659243	537456	362815	462001	941303	681275
AAR34928.1;ADI84390.1;AJY71562.1;BBA70063.1;QVW36724.1;UAC05561.1;UTG94196.1;WP_010942201.1;WP_119332516.1;WP_214303084.1	WP_324310477.1;BEH10462.1;WP_214303084.1;WP_119332516.1;WP_010942201.1;UTG94196.1;UAC05561.1;QVW36724.1;BBA70063.1;AJY71562.1;ADI84390.1;AAR34928.1	GGDEF;diguanylate;putative	0.0780366	0.848078	0.991407	0	0	407467	161342	391996	325334	301539	387334
AAR34931.1;ADI84393.1;AJY71559.1;QVW36727.1;UAC05564.1;UTG94199.1;WP_010942204.1	WP_286349817.1;WP_324310471.1;BEH10459.1;WP_119332519.1;WP_010942204.1;UTG94199.1;UAC05564.1;QVW36727.1;BBA70066.1;AJY71559.1;ADI84393.1;AAR34931.1	mechanosensitive	-0.731969	0.120342	0.970495	0	0	686814	543397	678661	201416	386021	561860
AAR34935.1;ADI84396.1;AJY71556.1;CBF93725.1;CBF97245.1;CBG14866.1;CBV07245.1;CBV10765.1;CBV28312.1;UAC05567.1;UTG94202.1;WP_010942207.1;WP_254278536.1	WP_214303086.1;WP_010942207.1;WP_254278536.1;WP_286349815.1;WP_119332522.1;WP_324310469.1;BEH10456.1;UTG94202.1;UAC05567.1;QVW36730.1;BBA70069.1;AJY71556.1;ADI84396.1;AAR34935.1;CBV07245.1;CBV28312.1;CBV10765.1;CBG14866.1;CBF97245.1;CBF93725.1	PBP1A;membrane;penicillin-binding;unnamed	0.252122	0.426679	0.970495	0	0	1960000	970117	1730000	1930000	1880000	1740000
AAR34936.1;ADI84397.1;AJY71555.1;BBA70070.1;UAC05568.1;UTG94203.1;WP_010942208.1	UTG94203.1;UAC05568.1;WP_010942208.1;BBA70070.1;AJY71555.1;ADI84397.1;AAR34936.1	MTH1187;hypothetical;protein	0.0194962	0.956146	1	0	0	1090000	1630000	1690000	1090000	2030000	1350000
AAR34938.2;ADI84398.1;AJY71554.1;UAC05569.1;UTG94204.1;WP_010942209.1	WP_214303088.1;WP_286349813.1;WP_010942209.1;WP_324310466.1;BEH10454.1;UTG94204.1;UAC05569.1;QVW36732.1;AJY71554.1;AAR34938.2;ADI84398.1	Glu/Leu/Phe/Val;NAD-glutamate;amino	0.0453983	0.704546	0.974322	0	0	3330000	3160000	3520000	3780000	3550000	3000000
AAR34939.1;ADI84399.1;AJY71553.1;QVW36733.1;UAC05570.1;UTG94205.1;WP_010942210.1	UTG94205.1;UAC05570.1;QVW36733.1;AJY71553.1;ADI84399.1;AAR34939.1;WP_010942210.1	hypothetical	1.13	0.153191	0.970495	0	0	346198	388451	1220000	897912	1340000	2040000
AAR34940.2;ADI84400.1;AJY71552.1;BBA70073.1;QVW36734.1;UAC05571.1;UTG94206.1;WP_010942211.1;WP_119332525.1	UTG94206.1;UAC05571.1;QVW36734.1;WP_119332525.1;WP_010942211.1;BBA70073.1;AJY71552.1;AAR34940.2;ADI84400.1	2'-deoxyribonucleoside;2-deoxyribonucleoside;hypothetical;nucleoside	0.0474253	0.888229	0.995781	0	0	1260000	1140000	1490000	1860000	1050000	1110000
AAR34952.1;ADI84412.1;AJY71541.1;BBA70079.1;UAC05582.1;UTG94217.1;WP_010942223.1	UTG94217.1;UAC05582.1;WP_010942223.1;BBA70079.1;AJY71541.1;ADI84412.1;AAR34952.1	(R)-methylmalonyl-CoA;Methylmalonyl-CoA;cobalamin;methylmalonyl-CoA	-0.040642	0.884479	0.995781	0	0	10100000	18100000	15000000	15100000	14700000	12200000
AAR34953.1;ADI84413.1;AJY71540.1;UAC05583.1;UTG94218.1;WP_010942224.1	WP_324310443.1;WP_119332531.1;WP_010942224.1;BEH10439.1;UTG94218.1;UAC05583.1;QVW36746.1;BBA70080.1;AJY71540.1;ADI84413.1;AAR34953.1	GTPase;methylmalonyl;protein	0.203241	0.685843	0.973029	0	0	1810000	3800000	2190000	2080000	2610000	4290000
AAR34957.1;ADI84417.1;AJY71536.1;BBA70084.1;BEH10435.1;QVW36750.1;UAC05587.1;UTG94222.1;WP_010942228.1;WP_119332535.1;WP_324310437.1	WP_324310437.1;WP_119332535.1;WP_010942228.1;BEH10435.1;UTG94222.1;UAC05587.1;QVW36750.1;BBA70084.1;AJY71536.1;ADI84417.1;AAR34957.1	ATP-dependent;dethiobiotin	-1.89393	0.0558758	0.970495	1	1	425550	497676	788712	180249	95024	185363
AAR34960.1;ADI84420.1;AJY71533.1;CBG00771.1;CBG08860.1;CBG12812.1;CBV14291.1;CBV22382.1;CBV26326.1;QVW36753.1;UAC05590.1;UTG94225.1;WP_010942231.1	WP_119332538.1;WP_010942231.1;BEH10432.1;UTG94225.1;UAC05590.1;QVW36753.1;BBA70087.1;AJY71533.1;ADI84420.1;AAR34960.1;CBV22382.1;CBV26326.1;CBV14291.1;CBG08860.1;CBG00771.1;CBG12812.1	transcription;unnamed	-0.147446	0.363664	0.970495	0	0	18500000	23200000	18000000	17200000	18100000	18600000
AAR34961.1;ADI84421.1;AJY71532.1;QVW36754.1;UAC05591.1;UTG94226.1;WP_010942232.1	WP_119332539.1;WP_010942232.1;WP_286349792.1;BEH10431.1;UTG94226.1;UAC05591.1;QVW36754.1;BBA70088.1;AJY71532.1;ADI84421.1;AAR34961.1	50S;DUF448;RNA-binding	0.230576	0.45964	0.970495	0	0	8670000	5540000	7890000	11100000	7230000	7600000
AAR34964.1;ADI84424.1;AJY71529.1;BBA70091.1;BEH10428.1;QVW36757.1;UAC05594.1;UTG94229.1;WP_010942235.1;WP_119332542.1;WP_286349790.1	WP_286349790.1;WP_119332542.1;WP_010942235.1;BEH10428.1;UTG94229.1;UAC05594.1;QVW36757.1;BBA70091.1;AJY71529.1;ADI84424.1;AAR34964.1	Bifunctional;DHH;bifunctional;phosphoesterase;phosphoesterase,	0.354191	0.433385	0.970495	0	0	856379	1340000	1660000	979488	2000000	1950000
AAR34968.1;ADI84428.1;AJY71525.1;QVW36760.1;UAC05597.1;UTG94232.1;WP_010942239.1	WP_286349788.1;WP_119332545.1;WP_324310426.1;BEH10424.1;WP_010942239.1;UTG94232.1;UAC05597.1;QVW36760.1;BBA70095.1;AJY71525.1;ADI84428.1;AAR34968.1	M16;insulinase;zinc;zinc-dependent	0.433109	0.328985	0.970495	0	0	3510000	3710000	3490000	4470000	6660000	3330000
AAR34970.1;ADI84430.1;AJY71523.1;CAY09333.1;QVW36762.1;UAC05599.1;UTG94234.1;WP_010942241.1	WP_010942241.1;UTG94234.1;UAC05599.1;QVW36762.1;AJY71523.1;ADI84430.1;AAR34970.1;CAY09333.1	L-threonylcarbamoyladenylate;tRNA;threonylcarbamoyl-AMP;translation;unnamed	0.0856914	0.829189	0.991407	0	0	1580000	1650000	1200000	1670000	911099	2120000
AAR34975.2;ADI84435.1;AJY71518.1;CAV20845.1;QVW36937.1;UAC05811.1;UTG94444.1;WP_010942246.1	WP_324310418.1;BEH10418.1;WP_119332551.1;WP_010942246.1;UTG94444.1;UAC05811.1;QVW36937.1;BBA70102.1;AJY71518.1;AAR34975.2;ADI84435.1;CAV20845.1	3-oxoacyl-(acyl;3-oxoacyl-ACP;beta-ketoacyl-ACP;ketoacyl-ACP;unnamed	-0.0475657	0.884779	0.995781	0	0	8770000	5910000	5670000	7790000	7360000	4540000
AAR34976.1;ADI84436.1;AJY71517.1;QVW36766.1;UAC05603.1;UTG94238.1;WP_010942247.1	WP_324310416.1;BEH10417.1;UTG94238.1;UAC05603.1;QVW36766.1;WP_119332552.1;WP_010942247.1;BBA70103.1;AJY71517.1;ADI84436.1;AAR34976.1	ACP;malonyl-CoA--acyl	0.173332	0.426975	0.970495	0	0	13100000	9300000	10500000	14600000	11100000	11400000
AAR34977.1;ADI84437.1;AJY71516.1;CBF61739.1;CBF99544.1;CBG07571.1;CBG14255.1;CBU86615.1;CBV13064.1;CBV21093.1;CBV27769.1;QVW36767.1;UAC05604.1;UTG94239.1;WP_010942248.1	WP_010942248.1;UTG94239.1;UAC05604.1;QVW36767.1;AJY71516.1;ADI84437.1;AAR34977.1;CBV27769.1;CBV21093.1;CBV13064.1;CBU86615.1;CBG07571.1;CBF99544.1;CBG14255.1;CBF61739.1	3-oxoacyl-(acyl;3-oxoacyl-ACP;3-oxoacyl-[acyl-carrier-protein];unnamed	0.184114	0.833634	0.991407	0	0	1050000	536383	403403	522007	308627	1430000
AAR34979.1;ADI84439.2;AJY71514.1;BBA70106.1;CBN69171.1;CBN70779.1;QVW36769.1;UAC05606.1;UTG94241.1;WP_010942250.1;WP_414973559.1;WP_420804629.1	WP_420804629.1;WP_416373120.1;WP_414973559.1;BEH10414.1;UTG94241.1;UAC05606.1;QVW36769.1;WP_010942250.1;BBA70106.1;AJY71514.1;ADI84439.2;AAR34979.1;CBN69171.1;CBN70779.1	3-oxoacyl-(acyl;3-oxoacyl-ACP;3-oxoacyl-[acyl-carrier-protein];beta-ketoacyl-ACP;unnamed	-0.0727064	0.752991	0.983129	0	0	40000000	31400000	28300000	28200000	28300000	38300000
AAR34980.1;ADI84440.1;AJY71513.1;BBA70107.1;QVW36770.1;UAC05607.1;UTG94242.1;WP_010942251.1;WP_119332555.1	UTG94242.1;UAC05607.1;QVW36770.1;WP_119332555.1;WP_010942251.1;BBA70107.1;AJY71513.1;ADI84440.1;AAR34980.1	Putative;ribose;ribose-5-phosphate	0.0990944	0.492549	0.970495	0	0	1390000	1530000	1440000	1530000	1780000	1360000
AAR34983.1;ADI84443.1;AJY71510.1;QVW36773.1;UAC05610.1;UTG94245.1;WP_010942254.1	WP_324310407.1;WP_286349776.1;BEH10410.1;WP_010942254.1;UTG94245.1;UAC05610.1;QVW36773.1;AJY71510.1;ADI84443.1;AAR34983.1	RND;TolC;efflux	0.289576	0.0824013	0.970495	0	0	7180000	5720000	5950000	7860000	7450000	7730000
AAR34985.1;ADI84445.1;AJY71508.1;BBA70112.1;BEH10408.1;CAV21734.1;CBG05631.1;CBV19153.1;QVW36775.1;UAC05612.1;UTG94247.1;WP_010942256.1;WP_119332560.1;WP_286349774.1;WP_324310403.1	WP_010942256.1;WP_324310403.1;WP_286349774.1;WP_119332560.1;BEH10408.1;UTG94247.1;UAC05612.1;QVW36775.1;BBA70112.1;AJY71508.1;ADI84445.1;AAR34985.1;CBV19153.1;CBG05631.1;CAV21734.1	MULTISPECIES:;Multidrug;acriflavine;efflux;unnamed	0.0796662	0.860075	0.993923	0	0	799181	522282	1360000	783699	1040000	1010000
AAR34988.1;ADI84448.1;AJY71505.1;BBA70115.1;BEH10405.1;QVW36778.1;UAC05615.1;UTG94250.1;WP_010942259.1;WP_119332563.1	BEH10405.1;UTG94250.1;UAC05615.1;QVW36778.1;WP_119332563.1;BBA70115.1;AJY71505.1;ADI84448.1;AAR34988.1;WP_010942259.1	CoA-binding;Rossmann;hypothetical	-0.0353939	0.954167	1	0	0	679322	1310000	545476	1300000	586209	587159
AAR35000.1;ADI84460.1;AJY71494.1;BBA70126.1;BEH10394.1;QVW36789.1;UAC05626.1;UTG94261.1;WP_324310383.1	WP_324310383.1;BEH10394.1;UTG94261.1;UAC05626.1;QVW36789.1;BBA70126.1;AJY71494.1;ADI84460.1;AAR35000.1	FadR;FadR/GntR;GntR;Pyruvate;helix-turn-helix	-0.0952512	0.724412	0.975743	0	0	903138	1320000	879110	897674	1160000	846369
AAR35003.1;ADI84464.1;AJY71490.1;BEH10390.1;QVW36793.1;UAC05630.1;UTG94265.1;WP_214303094.1	WP_214303094.1;WP_119332576.1;BEH10390.1;UTG94265.1;UAC05630.1;QVW36793.1;BBA70130.1;AJY71490.1;ADI84464.1;AAR35003.1	glyceraldehyde-3-phosphate;type	0.109082	0.505219	0.970495	0	0	43100000	49700000	49800000	59600000	49600000	44600000
AAR35004.2;ADI84465.2;AJY71489.1;BBA70131.1;BEH10389.1;QVW36938.1;UAC05631.1;UTG94445.1;WP_010942275.1;WP_286349761.1	WP_286349761.1;WP_010942275.1;BEH10389.1;UTG94445.1;UAC05631.1;QVW36938.1;BBA70131.1;AJY71489.1;AAR35004.2;ADI84465.2	ATP-binding;Histidine;MULTISPECIES:;PAS;cell;histidine;sensor	0.450012	0.276736	0.970495	0	0	370392	212483	236272	284959	342318	491720
AAR35005.2;ADI84466.1;AJY71488.1;BBA70132.1;BEH10388.1;QVW36794.1;UAC05632.1;UTG94266.1;WP_014551636.1;WP_167447389.1	WP_167447389.1;WP_014551636.1;BEH10388.1;UTG94266.1;UAC05632.1;QVW36794.1;BBA70132.1;AJY71488.1;AAR35005.2;ADI84466.1	MBL;Putative;beta-lactamase;metal-dependent	-0.169455	0.265571	0.970495	0	0	570236	542585	517718	549147	488784	411909
AAR35006.1;ADI84467.1;AJY71487.1;CBN60908.1;QVW36795.1;UAC05633.1;UTG94267.1;WP_010942277.1	WP_324310375.1;BEH10387.1;UTG94267.1;UAC05633.1;WP_119332578.1;WP_010942277.1;QVW36795.1;BBA70133.1;AJY71487.1;ADI84467.1;AAR35006.1;CBN60908.1	adenylosuccinate;unnamed	0.265552	0.108452	0.970495	0	0	11200000	10700000	8630000	12500000	11700000	12500000
AAR35007.1;ADI84468.1;AJY71486.1;BBA70134.1;QVW36939.1;UAC05812.1;UTG94446.1;WP_010942278.1;WP_119332579.1	WP_119332579.1;WP_010942278.1;UTG94446.1;UAC05812.1;QVW36939.1;BBA70134.1;AJY71486.1;ADI84468.1;AAR35007.1	Mechanosensitive;mechanosensitive;small-conductance	0.0177331	0.969698	1	0	0	2820000	1840000	1000000	1550000	2130000	2050000
AAR35008.1;ADI84469.1;AJY71485.1;QVW36796.1;UAC05634.1;UTG94268.1;WP_010942279.1;WP_214303095.1	WP_286349757.1;WP_214303095.1;WP_119332580.1;WP_010942279.1;WP_324310371.1;BEH10385.1;UTG94268.1;UAC05634.1;QVW36796.1;BBA70135.1;AJY71485.1;ADI84469.1;AAR35008.1	phosphoribosylformylglycinamidine	0.137159	0.377554	0.970495	0	0	13000000	13300000	11800000	15700000	14300000	11900000
AAR35009.1;ADI84470.1;AJY71484.1;UAC05635.1;WP_010942280.1	BEH10384.1;WP_214303096.1;UTG94269.1;UAC05635.1;QVW36797.1;WP_119332581.1;BBA70136.1;WP_010942280.1;AJY71484.1;ADI84470.1;AAR35009.1	phosphoribosylformylglycinamidine	0.0270001	0.876663	0.995781	0	0	9690000	10300000	12300000	12100000	11700000	9100000
AAR35010.2;ADI84471.1;AJY71483.1;BBA70137.1;CAW63514.1;CAW84512.1;CBC45574.1;CBC87479.1;QVW36798.1;UAC05813.1;UTG94270.1;WP_010942281.1;WP_119332582.1;WP_324310368.1	WP_324310368.1;WP_119332582.1;WP_010942281.1;BEH10383.1;UTG94270.1;UAC05813.1;QVW36798.1;BBA70137.1;AJY71483.1;AAR35010.2;ADI84471.1;CBC87479.1;CBC45574.1;CAW84512.1;CAW63514.1	Amidophosphoribosyltransferase;amidophosphoribosyltransferase;glutamine--phosphoribosylpyrophosphate;unnamed	0.0262099	0.858082	0.993071	0	0	5550000	6310000	6140000	5800000	7110000	5420000
AAR35011.1;ADI84472.1;AJY71482.1;BBA70138.1;BEH10382.1;QVW36799.1;UAC05636.1;UTG94271.1;WP_010942282.1;WP_119332583.1;WP_324310366.1	WP_324310366.1;BEH10382.1;UTG94271.1;UAC05636.1;QVW36799.1;WP_119332583.1;WP_010942282.1;BBA70138.1;AJY71482.1;ADI84472.1;AAR35011.1	Orotate;orotate	0.306951	0.0610556	0.970495	0	0	6010000	6330000	5670000	7670000	6600000	8010000
AAR35013.2;ADI84474.1;AJY71480.1;BBA70140.1;BEH10380.1;QVW36801.1;UAC05638.1;UTG94273.1;WP_010942284.1;WP_119332585.1;WP_286349753.1	WP_286349753.1;WP_119332585.1;WP_010942284.1;BEH10380.1;UTG94273.1;UAC05638.1;QVW36801.1;BBA70140.1;AJY71480.1;AAR35013.2;ADI84474.1	HTH-type;MULTISPECIES:;RrF2;Rrf2;winged	-0.239177	0.582796	0.970495	0	0	1790000	1070000	955747	996403	1440000	796407
AAR35015.1;ADI84476.1;AJY71478.1;BEH10378.1;CBG19419.1;CBV32774.1;QVW36803.1;UAC05640.1;UTG94275.1;WP_010942286.1;WP_324310361.1	WP_324310361.1;WP_010942286.1;BEH10378.1;UTG94275.1;UAC05640.1;QVW36803.1;AJY71478.1;ADI84476.1;AAR35015.1;CBV32774.1;CBG19419.1	cytochrome;unnamed	0.620489	0.114231	0.970495	0	0	622924	727093	931886	848190	1270000	1390000
AAR35016.1;ADI84477.1;BBA70143.1;BEH10377.1;QVW36804.1;UAC05641.1;UTG94276.1;WP_010942287.1;WP_119332588.1	WP_119332588.1;WP_010942287.1;BEH10377.1;UTG94276.1;UAC05641.1;QVW36804.1;BBA70143.1;ADI84477.1;AAR35016.1	MULTISPECIES:;ferritin;ferritin-like;hypothetical	-0.730358	0.365184	0.970495	0	0	3100000	735792	2940000	1780000	1550000	754138
AAR35018.1;ADI84479.1;AJY71475.1;BEH10375.1;QVW36806.1;UAC05643.1;UTG94278.1;WP_010942289.1	BEH10375.1;UTG94278.1;UAC05643.1;QVW36806.1;WP_119332590.1;WP_010942289.1;BBA70145.1;AJY71475.1;ADI84479.1;AAR35018.1	ABC;energy-dependent	0.00310324	0.974867	1	0	0	8390000	7780000	7050000	7720000	8310000	7240000
AAR35019.1;ADI84480.1;AJY71474.1;BBA70146.1;BEH10374.1;QVW36807.1;UAC05644.1;UTG94279.1;WP_010942290.1;WP_119332591.1;WP_214303097.1	BEH10374.1;UTG94279.1;UAC05644.1;WP_214303097.1;QVW36807.1;WP_119332591.1;BBA70146.1;AJY71474.1;WP_010942290.1;ADI84480.1;AAR35019.1	hypothetical;lipoprotein;lipoprotein,	0.312826	0.0383621	0.948398	0	0	1040000	1020000	1120000	1190000	1390000	1370000
AAR35022.1;ADI84482.2;AJY71472.1;QVW36809.1;UAC05646.1;UTG94281.1;WP_010942292.1;WP_235045011.1	WP_232009002.1;WP_010942292.1;UTG94281.1;WP_235045011.1;UAC05646.1;QVW36809.1;BBA70148.1;AJY71472.1;ADI84482.2;AAR35022.1	cytochrome;menaquinol	0.243087	0.71991	0.975021	0	0	813710	711296	569391	726613	352153	1400000
AAR35023.1;ADI84483.1;AJY71471.1;QVW36810.1;UAC05647.1;UTG94282.1;WP_010942293.1;WP_214303098.1	WP_214303098.1;WP_286349746.1;WP_119332594.1;WP_010942293.1;WP_324310354.1;BEH10371.1;UTG94282.1;UAC05647.1;QVW36810.1;BBA70149.1;AJY71471.1;ADI84483.1;AAR35023.1	cytochrome;menaquinol	-0.539444	0.0420744	0.952267	0	0	987970	782617	849984	462951	673229	666867
AAR35024.1;ADI84484.1;AJY71470.1;BBA70150.1;BEH10370.1;QVW36811.1;UAC05648.1;UTG94283.1;WP_010942294.1;WP_324310352.1	WP_010942294.1;WP_324310352.1;BEH10370.1;UTG94283.1;UAC05648.1;QVW36811.1;BBA70150.1;AJY71470.1;ADI84484.1;AAR35024.1	Cytochrome;Rieske;cytochrome;menaquinol;ubiquinol-cytochrome	-0.731887	0.404471	0.970495	0	0	258351	60563	242893	204126	44832	89315
AAR35026.1;ADI84486.2;AJY71988.1;BEH10368.1;QVW36813.1;UAC05650.1;UTG94285.1;WP_010942296.1;WP_324310348.1	WP_324310348.1;BEH10368.1;UTG94285.1;UAC05650.1;QVW36813.1;AJY71988.1;ADI84486.2;AAR35026.1;WP_010942296.1	hypothetical	-0.0547806	0.841346	0.991407	1	0	422508	417594	652769	417474	490874	528900
AAR35028.1;ADI84488.1;BBA70154.1;QVW36815.1;UAC05652.1;UTG94287.1;WP_010942298.1;WP_254278544.1	WP_010942298.1;WP_324310344.1;WP_286349742.1;WP_254278544.1;BEH10366.1;UTG94287.1;UAC05652.1;QVW36815.1;BBA70154.1;ADI84488.1;AAR35028.1	Cyclic;HD;response	0.0980906	0.659393	0.97248	0	0	1050000	1140000	1370000	1400000	980467	1430000
AAR35029.1;UAC05653.1;WP_010942299.1	WP_119332596.1;WP_010942299.1;WP_014551637.1;UTG94288.1;UAC05653.1;QVW36816.1;BBA70155.1;AJY71465.1;ADI84489.1;AAR35029.1	response	0.0496693	0.787471	0.988936	0	0	412262	470587	441418	371178	459729	539746
AAR35034.1;ADI84490.2;AJY71464.1;BBA70156.1;BEH10364.1;QVW36940.1;UAC05814.1;UTG94447.1;WP_235045012.1;WP_238525143.1;WP_250546398.1;WP_269461458.1;WP_286349740.1;WP_324310339.1	WP_286349740.1;WP_269461458.1;WP_250546398.1;WP_238525143.1;WP_235045012.1;WP_324310339.1;BEH10364.1;UTG94447.1;UAC05814.1;QVW36940.1;BBA70156.1;AJY71464.1;ADI84490.2;AAR35034.1	GGDEF;diguanylate;putative;response;sensor	-0.0975976	0.850887	0.991407	0	0	599120	254583	427575	591643	330992	274832
AAR35036.1;ADI84493.1;AJY71461.1;QVW36818.1;UAC05655.1;UTG94290.1;WP_010942302.1	WP_119332599.1;WP_010942302.1;BEH10362.1;UTG94290.1;UAC05655.1;QVW36818.1;BBA70158.1;AJY71461.1;ADI84493.1;AAR35036.1	diguanylate;response	0.110591	0.531021	0.970495	0	0	1020000	1180000	1440000	1240000	1260000	1430000
AAR35038.1;ADI84496.1;AJY71459.1;QVW36820.1;UAC05657.1;UTG94292.1;WP_010942304.1	WP_119332601.1;WP_010942304.1;BEH10360.1;UTG94292.1;UAC05657.1;QVW36820.1;BBA70160.1;AJY71459.1;ADI84496.1;AAR35038.1	aconitate;bifunctional;hypothetical	0.0211498	0.876992	0.995781	0	0	67500000	67300000	54800000	71700000	60100000	60600000
AAR35046.1;ADI84504.1;AJY71451.1;QVW36827.1;UAC05665.1;UTG94299.1;WP_010942312.1	UTG94299.1;UAC05665.1;QVW36827.1;AJY71451.1;ADI84504.1;AAR35046.1;WP_010942312.1	hypothetical	-0.151896	0.607276	0.970495	0	0	659747	532914	381242	486937	388715	540966
AAR35050.1;ADI84508.1;AJY71447.1;QVW36831.1;UAC05669.1;UTG94303.1;WP_010942316.1;WP_045668373.1;WP_214303100.1	UTG94303.1;UAC05669.1;WP_214303100.1;QVW36831.1;WP_010942316.1;WP_045668373.1;AJY71447.1;ADI84508.1;AAR35050.1	D-2-hydroxyacid;glycerate;hydroxypyruvate	-0.270928	0.610102	0.970495	0	0	546833	315544	292016	493317	230615	232813
AAR35052.1;ADI84510.1;AJY71445.1;QVW36832.1;UAC05670.1;UTG94304.1;WP_010942318.1;WP_324310316.1	WP_324310316.1;BEH10347.1;UTG94304.1;UAC05670.1;QVW36832.1;WP_119332610.1;BBA70173.1;AJY71445.1;ADI84510.1;AAR35052.1;WP_010942318.1	hypothetical	-0.553154	0.102174	0.970495	0	0	1960000	1740000	2580000	1660000	1100000	1520000
AAR35055.1;ADI84512.1;AJY71443.1;BEH10345.1;QVW36834.1;UAC05672.1;UTG94306.1;WP_010942320.1;WP_014551638.1;WP_214303101.1;WP_286349722.1;WP_324310312.1	WP_286349722.1;WP_010942320.1;WP_214303101.1;WP_014551638.1;WP_324310312.1;BEH10345.1;UTG94306.1;UAC05672.1;QVW36834.1;AJY71443.1;ADI84512.1;AAR35055.1	AMP-binding;MULTISPECIES:;acyl-(acyl	-0.312531	0.141701	0.970495	0	0	227709	207214	179564	182961	180060	131781
AAR35056.1;ADI84513.1;AJY71442.1;CBG22349.1;CBV35510.1;QVW36835.1;UAC05673.1;UTG94307.1;WP_010942321.1	WP_010942321.1;UTG94307.1;UAC05673.1;QVW36835.1;AJY71442.1;ADI84513.1;AAR35056.1;CBV35510.1;CBG22349.1	ATPase;cation-translocating;unnamed	0.0578602	0.689591	0.973209	0	0	1390000	1100000	1420000	1220000	1420000	1430000
AAR35059.1;ADI84515.2;AJY71440.1;BEH10341.1;QVW36838.1;UAC05676.1;UTG94310.1;WP_010942324.1	WP_324310306.1;WP_119332615.1;WP_010942324.1;BEH10341.1;UTG94310.1;UAC05676.1;QVW36838.1;BBA70179.1;AJY71440.1;ADI84515.2;AAR35059.1	AAA;BioD;cobyrinic;phosphotransacetylase	0.0911998	0.779307	0.988715	0	0	1180000	2180000	2310000	1670000	2060000	2310000
AAR35064.1;ADI84520.1;AJY71433.1;BEH10336.1;QVW36842.1;UAC05681.1;UTG94315.1;WP_010942329.1;WP_286349713.1	WP_286349713.1;WP_119332618.1;BEH10336.1;UTG94315.1;UAC05681.1;QVW36842.1;WP_010942329.1;BBA70184.1;AJY71433.1;ADI84520.1;AAR35064.1	MULTISPECIES:;cytidine;cytidine/deoxycytidylate;deoxycytidylate	0.109537	0.777345	0.988715	0	0	902959	661853	1460000	1020000	1270000	973415
AAR35066.1;ADI84522.2;AJY71431.1;QVW36844.1;UAC05683.1;UTG94317.1;WP_010942331.1	UTG94317.1;WP_010942331.1;UAC05683.1;QVW36844.1;AJY71431.1;ADI84522.2;AAR35066.1	2,5-diamino-6-(5'-phosphoribosylamino)-4-(3H)-pyrimidinone;DeoR;bifunctional	-0.486994	0.527577	0.970495	0	0	336734	350306	936993	239824	392510	526430
AAR35067.1;ADI84523.1;AJY71430.1;BBA70187.1;BEH10333.1;QVW36845.1;UAC05684.1;UTG94318.1;WP_010942332.1;WP_119332620.1;WP_214303103.1	BEH10333.1;UTG94318.1;UAC05684.1;WP_214303103.1;QVW36845.1;WP_119332620.1;WP_010942332.1;BBA70187.1;AJY71430.1;ADI84523.1;AAR35067.1	Riboflavin;riboflavin	0.418127	0.0230814	0.948398	0	0	1800000	1810000	2220000	2570000	2750000	2470000
AAR35068.1;ADI84524.1;AJY71429.1;BBA70188.1;BEH10332.1;QVW36846.1;UAC05685.1;UTG94319.1;WP_010942333.1	BEH10332.1;UTG94319.1;WP_010942333.1;UAC05685.1;QVW36846.1;BBA70188.1;AJY71429.1;ADI84524.1;AAR35068.1	3,4-dihydroxy-2-butanone;3,4-dihydroxy-2-butanone-4-phosphate;Riboflavin;bifunctional	0.032259	0.834737	0.991407	0	0	7120000	9720000	8810000	8740000	8100000	9390000
AAR35071.1;ADI84527.1;AJY71426.1;QVW36849.1;UAC05688.1;UTG94322.1;WP_010942336.1;WP_214303104.1	BEH10329.1;WP_214303104.1;WP_119332623.1;WP_010942336.1;UTG94322.1;UAC05688.1;QVW36849.1;BBA70191.1;AJY71426.1;ADI84527.1;AAR35071.1	homoserine	0.0564451	0.507802	0.970495	0	0	14000000	14000000	12100000	13800000	14500000	13400000
AAR35072.1;ADI84528.1;AJY71425.1;BBA70192.1;BEH10328.1;QVW36850.1;UAC05689.1;UTG94323.1;WP_119334069.1;WP_214303105.1	BEH10328.1;UTG94323.1;UAC05689.1;WP_214303105.1;QVW36850.1;WP_119334069.1;BBA70192.1;AJY71425.1;ADI84528.1;AAR35072.1	GMP/IMP;HAD;haloacid	0.33895	0.53071	0.970495	0	0	677181	251136	447692	603513	348658	788254
AAR35073.1;ADI84529.1;AJY71424.1;UAC05690.1;UTG94324.1;WP_010942338.1;WP_254278545.1	WP_254278545.1;UTG94324.1;UAC05690.1;WP_214303106.1;WP_119332624.1;WP_010942338.1;QVW36851.1;BBA70193.1;AJY71424.1;ADI84529.1;AAR35073.1	threonine	0.246161	0.0997726	0.970495	0	0	7510000	6040000	6230000	8160000	7390000	7910000
AAR35074.1;ADI84530.1;AJY71423.1;UAC05691.1;UTG94325.1;WP_010942339.1;WP_045668371.1	WP_214303107.1;WP_286349706.1;WP_119332625.1;WP_045668371.1;WP_324310290.1;BEH10326.1;WP_010942339.1;UTG94325.1;UAC05691.1;QVW36852.1;BBA70194.1;AJY71423.1;ADI84530.1;AAR35074.1	AAA;ATPase;MoxR	-0.422343	0.229184	0.970495	0	0	1110000	1090000	982368	786882	517839	1070000
AAR35076.2;ADI84534.1;AJY71420.1;QVW36854.1;UAC05693.1;UTG94327.1;WP_010942342.1	WP_010942342.1;WP_119332628.1;WP_286349703.1;WP_324310285.1;BEH10323.1;UTG94327.1;UAC05693.1;QVW36854.1;BBA70197.1;AJY71420.1;AAR35076.2;ADI84534.1	TPR;hypothetical;tetratricopeptide	0.131977	0.439434	0.970495	0	0	1490000	1160000	1630000	1510000	1500000	1680000
AAR35078.1;ADI84536.1;AJY71418.1;QVW36856.1;UAC05695.1;UTG94329.1;WP_010942344.1	BEH10321.1;WP_119332630.1;WP_010942344.1;UTG94329.1;UAC05695.1;QVW36856.1;BBA70199.1;AJY71418.1;ADI84536.1;AAR35078.1	NADP-dependent;malate;malic	-0.00826033	0.948434	1	0	0	8730000	7240000	6800000	7720000	7650000	7270000
AAR35079.1;ADI84537.2;AJY71417.1;BBA70200.1;BEH10320.1;QVW36857.1;UAC05696.1;UTG94330.1;WP_010942345.1;WP_119332631.1;WP_286349700.1;WP_324310282.1	WP_286349700.1;WP_119332631.1;WP_324310282.1;BEH10320.1;UTG94330.1;UAC05696.1;QVW36857.1;BBA70200.1;WP_010942345.1;AJY71417.1;ADI84537.2;AAR35079.1	AP-4-A;HIT;MULTISPECIES:;bis-adenosyl-polyphosphate	0.901578	0.3413	0.970495	0	0	66055	167741	98073	350525	182662	86780
AAR35080.1;ADI84538.1;AJY71416.1;QVW36858.1;UAC05697.1;UTG94331.1;WP_010942346.1	WP_010942346.1;UTG94331.1;UAC05697.1;QVW36858.1;AJY71416.1;ADI84538.1;AAR35080.1	ROK	-0.0712388	0.85543	0.991862	0	0	740014	498991	1120000	670509	812265	762575
AAR35081.1;ADI84539.2;AJY71415.1;QVW36859.1;UAC05698.1;UTG94332.1;WP_010942347.1	BEH10318.1;UTG94332.1;UAC05698.1;QVW36859.1;WP_119332633.1;WP_010942347.1;BBA70202.1;AJY71415.1;ADI84539.2;AAR35081.1	6-phosphofructokinase	-0.159576	0.268657	0.970495	0	0	2380000	2450000	2810000	2180000	2590000	2070000
AAR35082.1;ADI84540.1;AJY71414.1;BEH10317.1;QVW36860.1;UAC05699.1;UTG94333.1;WP_010942348.1;WP_286349697.1;WP_324310278.1	WP_324310278.1;WP_286349697.1;WP_010942348.1;BEH10317.1;UTG94333.1;UAC05699.1;QVW36860.1;pdb|3OOV|B;pdb|3OOV|A;AJY71414.1;ADI84540.1;AAR35082.1	GAF;chemotaxis;methyl-accepting	0.234138	0.188432	0.970495	0	0	3070000	4230000	3710000	4430000	4360000	4160000
AAR35085.1;ADI84544.1;AJY71411.1;QVW36863.1;UAC05702.1;UTG94336.1;WP_010942351.1;WP_214303108.1;WP_254278546.1	WP_324310272.1;WP_254278546.1;WP_214303108.1;WP_119332637.1;WP_010942351.1;BEH10314.1;UTG94336.1;UAC05702.1;QVW36863.1;BBA70206.1;AJY71411.1;ADI84544.1;AAR35085.1	glutamate;putative;pyridoxal-5'-phosphate-dependent;pyridoxal-dependent	0.0705118	0.903667	0.9965	0	0	1790000	1530000	1370000	1600000	684918	2640000
AAR35086.1;ADI84545.1;AJY71410.1;QVW36864.1;UAC05703.1;UTG94337.1;WP_010942352.1;WP_014551639.1	WP_014551639.1;WP_286349693.1;WP_010942352.1;WP_119332638.1;WP_324310270.1;BEH10313.1;UTG94337.1;UAC05703.1;QVW36864.1;BBA70207.1;AJY71410.1;ADI84545.1;AAR35086.1	amidohydrolase;metal-dependent	-0.0296362	0.884277	0.995781	0	0	1690000	1780000	1940000	1350000	1880000	2070000
AAR35088.1;UAC05706.1;WP_010942355.1	WP_010942355.1;UAC05706.1;AAR35088.1	integrative;recombinase	-0.366184	0.45628	0.970495	0	0	760138	1280000	671244	531822	561754	1010000
AAR35093.1;ADI84547.1;AJY71280.1;CBF86401.1;CBV02149.1;QVW36866.1;UAC05711.1;UTG91181.1;WP_010942361.1	WP_324310266.1;BEH10298.1;UTG91181.1;UAC05711.1;QVW36866.1;WP_119332645.1;WP_010942361.1;BBA70213.1;AJY71280.1;ADI84547.1;AAR35093.1;CBV02149.1;CBF86401.1	adenosine-5'-phosphosulfate;adenylylsulfate;phosphoadenylyl-sulfate;unnamed	0.0980321	0.506677	0.970495	0	0	14800000	12500000	11100000	13800000	14500000	12800000
AAR35094.1;ADI84548.1;AJY71279.1;QVW36867.1;UAC05712.1;UTG91182.1;WP_010942362.1	WP_010942362.1;WP_286349677.1;WP_066357407.1;BEH10297.1;UTG91182.1;UAC05712.1;QVW36867.1;BBA70214.1;AJY71279.1;ADI84548.1;AAR35094.1	sulfate	0.205569	0.558024	0.970495	0	0	27200000	24500000	24700000	38800000	29800000	19500000
AAR35095.1;ADI84549.1;AJY71278.1;UAC05713.1;UTG91183.1;WP_010942363.1	WP_119332646.1;WP_010942363.1;WP_214303109.1;WP_286349676.1;WP_324310264.1;BEH10296.1;UTG91183.1;UAC05713.1;QVW36868.1;BBA70215.1;AJY71278.1;ADI84549.1;AAR35095.1	GTP-binding;elongation;sulfate	-0.00817393	0.970403	1	0	0	18900000	18500000	15700000	21500000	17600000	13700000
AAR35096.1;ADI84550.1;AJY71277.1;BBA70216.1;BEH10295.1;QVW36869.1;UAC05714.1;UTG91184.1;WP_010942364.1;WP_119332647.1;WP_286349675.1	WP_119332647.1;WP_286349675.1;WP_010942364.1;BEH10295.1;UTG91184.1;UAC05714.1;QVW36869.1;BBA70216.1;AJY71277.1;ADI84550.1;AAR35096.1	MULTISPECIES:;hypothetical;plasmid	0.464424	0.478468	0.970495	0	0	421370	135513	203368	294805	521969	232195
AAR35097.1;ADI84551.1;AJY71276.1;QVW36870.1;UAC05715.1;UTG91185.1;WP_010942365.1	UTG91185.1;UAC05715.1;QVW36870.1;WP_010942365.1;AJY71276.1;ADI84551.1;AAR35097.1	6-carboxy-5,6,7,8-tetrahydropterin;6-carboxytetrahydropterin;6-pyruvoyl	0.10425	0.261313	0.970495	0	0	3730000	3640000	4240000	4250000	3970000	4260000
AAR35099.1;ADI84553.1;AJY71274.1;QVW36872.1;UAC05717.1;WP_010942367.1	WP_254277919.1;WP_010942367.1;WP_286349673.1;WP_119332649.1;WP_324310259.1;BEH10292.1;UTG91187.1;UAC05717.1;QVW36872.1;BBA70219.1;AJY71274.1;ADI84553.1;AAR35099.1	creatininase;creatinine	0.262456	0.307487	0.970495	0	0	2710000	2300000	3310000	2790000	3160000	4030000
AAR35102.1;ADI84556.1;AJY71271.1;QVW33678.1;UAC05720.1;UTG91190.1;WP_010942370.1;WP_254277922.1	WP_286349662.1;WP_254277922.1;WP_010942370.1;WP_324310242.1;BEH10280.1;UTG91190.1;UAC05720.1;QVW33678.1;AJY71271.1;ADI84556.1;AAR35102.1	AAA;DNA;SMC;nuclease	0.246957	0.563292	0.970495	0	0	524834	305649	644487	423092	785903	541354
AAR35106.1;ADI84566.1;AJY71263.1;BBA70229.1;BEH10275.1;QVW33685.1;UAC05724.1;UTG91196.1;WP_010942374.1;WP_119332657.1	BEH10275.1;UTG91196.1;UAC05724.1;QVW33685.1;WP_010942374.1;WP_119332657.1;BBA70229.1;AJY71263.1;ADI84566.1;AAR35106.1	Phenylacetate-coenzyme;phenylacetate--CoA;phenylacetate--coenzyme	-0.129777	0.76392	0.985743	0	0	3550000	8000000	6700000	7280000	5310000	4090000
AAR35107.1;ADI84567.1;AJY71262.1;QVW33686.1;UAC05725.1;UTG91197.1;WP_010942375.1	BEH10274.1;WP_119332658.1;WP_010942375.1;UTG91197.1;UAC05725.1;QVW33686.1;BBA70230.1;AJY71262.1;ADI84567.1;AAR35107.1	ABC;branched-chain;leucine/isoleucine/valine	0.279261	0.226362	0.970495	0	0	2940000	3110000	3970000	3750000	4810000	3600000
AAR35108.1;ADI84568.1;AJY71261.1;QVW33687.1;UAC05726.1;UTG91198.1;WP_010942376.1	WP_324310231.1;BEH10273.1;WP_119332659.1;WP_010942376.1;UTG91198.1;UAC05726.1;QVW33687.1;BBA70231.1;AJY71261.1;ADI84568.1;AAR35108.1	ABC;branched-chain;leucine/isoleucine/valine	-0.027233	0.932347	1	0	0	1360000	1650000	811459	1270000	1320000	1160000
AAR35109.1;ADI84569.1;AJY71260.1;QVW33688.1;UAC05727.1;UTG91199.1;WP_010942377.1	WP_010942377.1;UTG91199.1;UAC05727.1;QVW33688.1;AJY71260.1;ADI84569.1;AAR35109.1	branched-chain	-0.118918	0.714469	0.974322	0	0	672669	477321	550757	662716	566863	336602
AAR35111.1;ADI84571.1;AJY71258.1;QVW33690.1;UAC05729.1;UTG91201.1;WP_010942379.1	WP_324310227.1;BEH10270.1;UTG91201.1;UAC05729.1;QVW33690.1;WP_010942379.1;WP_119332662.1;BBA70234.1;AJY71258.1;ADI84571.1;AAR35111.1	ABC;branched-chain	-0.113554	0.268595	0.970495	0	0	23500000	24300000	20900000	20400000	20200000	22900000
AAR35112.1;ADI84572.1;AJY71257.1;QVW33691.1;UAC05730.1;UTG91202.1;WP_010942380.1	WP_324310225.1;BEH10269.1;UTG91202.1;UAC05730.1;QVW33691.1;WP_010942380.1;WP_119332663.1;BBA70235.1;AJY71257.1;ADI84572.1;AAR35112.1	ABC;branched-chain	0.196223	0.0368658	0.948398	0	0	16000000	14100000	15200000	17500000	17900000	16500000
AAR35113.1;ADI84573.1;AJY71256.1;BEH10268.1;QVW33692.1;UAC05731.1;UTG91203.1;WP_010942381.1;WP_286349651.1	WP_119332664.1;WP_039644567.1;WP_286349651.1;WP_010942381.1;BEH10268.1;UTG91203.1;UAC05731.1;QVW33692.1;BBA70236.1;AJY71256.1;ADI84573.1;AAR35113.1	ACT;MULTISPECIES:;amino	-0.0858022	0.603322	0.970495	0	0	22500000	30000000	28900000	23100000	25600000	28000000
AAR35114.1;ADI84574.1;AJY71255.1;QVW33693.1;UAC05732.1;UTG91204.1;WP_010942382.1	UTG91204.1;UAC05732.1;QVW33693.1;WP_010942382.1;AJY71255.1;ADI84574.1;AAR35114.1	phenylacetate--CoA;phenylacetate--coenzyme	0.146357	0.505699	0.970495	0	0	11400000	15900000	11100000	15300000	15000000	12200000
AAR35115.1;ADI84575.1;AJY71254.1;BBA70238.1;BEH10266.1;QVW33694.1;UAC05733.1;UTG91205.1;WP_010942383.1;WP_119332666.1	BEH10266.1;UTG91205.1;UAC05733.1;QVW33694.1;WP_119332666.1;BBA70238.1;WP_010942383.1;AJY71254.1;ADI84575.1;AAR35115.1	hypothetical;indolepyruvate;indolepyruvate:ferredoxin	0.181337	0.698118	0.974322	0	0	3110000	4860000	7560000	7530000	6110000	3970000
AAR35120.1;ADI84580.1;AJY71249.1;UAC05738.1;UTG91210.1;WP_010942388.1	UTG91210.1;UAC05738.1;AJY71249.1;WP_010942388.1;ADI84580.1;AAR35120.1	hypothetical;lipoprotein;lipoprotein,	-0.128986	0.301854	0.970495	0	0	1890000	2050000	2140000	1840000	2070000	1650000
AAR35122.1;ADI84582.1;AJY71247.1;BBA70245.1;BEH10259.1;QVW33701.1;UAC05740.1;UTG91212.1;WP_010942390.1;WP_119332673.1;WP_214302333.1;WP_254277926.1;WP_286349642.1;WP_324310205.1	WP_119332673.1;WP_010942390.1;WP_214302333.1;WP_286349642.1;WP_324310205.1;BEH10259.1;WP_254277926.1;UTG91212.1;UAC05740.1;QVW33701.1;BBA70245.1;AJY71247.1;ADI84582.1;AAR35122.1	MULTISPECIES:;OmpA;Outer;membrane;peptidoglycan-binding	0.45626	0.33019	0.970495	1	0	99851.9	42289	91396	70707	135138	114563
AAR35123.1;ADI84583.1;AJY71246.1;BBA70246.1;BEH10258.1;QVW33702.1;UAC05741.1;UTG91213.1	BEH10258.1;UTG91213.1;UAC05741.1;QVW33702.1;BBA70246.1;AJY71246.1;ADI84583.1;AAR35123.1	DNA-binding;HU;Integration;integration	0.326166	0.482998	0.970495	0	0	858388	322320	915005	1080000	895307	652041
AAR35126.2;ADI84586.2;UAC02498.1;UTG91216.1;WP_010942394.1	WP_324310199.1;BEH10255.1;UTG91216.1;UAC02498.1;QVW33705.1;WP_119332676.1;AAR35126.2;ADI84586.2;WP_010942394.1	hypothetical	-0.133198	0.849802	0.991407	0	0	156069	540659	598366	229518	644504	306855
AAR35131.1;ADI84590.1;AJY71239.1;QVW33709.1;UAC02502.1;UTG91220.1;WP_010942398.1	WP_119332678.1;WP_010942398.1;BEH10251.1;UTG91220.1;UAC02502.1;QVW33709.1;BBA70253.1;AJY71239.1;ADI84590.1;AAR35131.1	KamA;lysine;translation	0.028636	0.830857	0.991407	0	0	1160000	1200000	1130000	999965	1310000	1250000
AAR35133.1;ADI84592.1;AJY71237.1;BBA70255.1;QVW33711.1;UAC02504.1;UTG91222.1;WP_010942400.1;WP_119332680.1	BEH10249.1;UTG91222.1;UAC02504.1;QVW33711.1;WP_119332680.1;BBA70255.1;WP_010942400.1;AJY71237.1;ADI84592.1;AAR35133.1	Dihydroorotate;dihydroorotate	-0.131125	0.580343	0.970495	0	0	3050000	3740000	4720000	3930000	3140000	3440000
AAR35134.1;ADI84593.2;AJY71236.1;BBA70256.1;BEH10248.1;QVW33712.1;UAC02505.1;UTG91223.1;WP_010942401.1;WP_045668268.1;WP_254277927.1;WP_394371591.1;WP_414973553.1;WP_416373118.1	WP_416373118.1;WP_414973553.1;WP_394371591.1;BEH10248.1;WP_254277927.1;UTG91223.1;WP_045668268.1;WP_010942401.1;UAC02505.1;QVW33712.1;BBA70256.1;AJY71236.1;ADI84593.2;AAR35134.1	alanine;hypothetical;ribosomal	-1.41706	0.0352151	0.948398	1	0	1.29406e+06	1070000	1230000	742967	148409	454510
AAR35136.1;ADI84595.1;AJY71234.1;QVW33714.1;UAC02507.1;UTG91225.1;WP_010942403.1;WP_214302335.1	WP_214302335.1;WP_010942403.1;UTG91225.1;UAC02507.1;QVW33714.1;AJY71234.1;ADI84595.1;AAR35136.1	phosphoribosylglycinamide	0.0950825	0.722161	0.975021	0	0	3340000	2280000	2600000	2230000	3510000	3040000
AAR35138.1;ADI84596.1;AJY71232.1;QVW33716.1;UAC02509.1;UTG91227.1;WP_010942405.1;WP_014551650.1;WP_214302336.1;WP_302054674.1	WP_302054674.1;WP_214302336.1;WP_014551650.1;WP_010942405.1;UTG91227.1;UAC02509.1;QVW33716.1;AJY71232.1;ADI84596.1;AAR35138.1	c-type;cytochrome;lipoprotein	1.10972	0.0123867	0.875241	0	0	577388	654435	468795	1010000	1320000	1340000
AAR35139.1;ADI84597.2;AJY71231.1;QVW33717.1;UAC02510.1;UTG91228.1;WP_010942406.1;WP_235044853.1	WP_119332686.1;WP_010942406.1;WP_286349629.1;WP_235044853.1;BEH10243.1;UTG91228.1;UAC02510.1;QVW33717.1;BBA70261.1;AJY71231.1;ADI84597.2;AAR35139.1	TPR;hypothetical;peptidase	0.0147828	0.980509	1	0	0	750265	453512	1540000	652036	1030000	1090000
AAR35142.1;ADI84600.1;AJY71228.1;CBF64817.1;CBU89688.1;QVW33720.1;UAC02512.1;UTG91231.1;WP_010942409.1	WP_119332689.1;WP_010942409.1;WP_324310178.1;BEH10240.1;UTG91231.1;UAC02512.1;QVW33720.1;BBA70264.1;AJY71228.1;ADI84600.1;AAR35142.1;CBU89688.1;CBF64817.1	polyprenyl;trans-isoprenyl;unnamed	0.267877	0.188008	0.970495	0	0	6920000	8050000	6840000	7260000	9870000	9130000
AAR35145.1;ADI84603.1;AJY71225.1;BBA70267.1;QVW33723.1;UAC02515.1;UTG91234.1;WP_010942412.1;WP_119332692.1;WP_254277928.1;WP_324310172.1	WP_010942412.1;WP_286349624.1;WP_324310172.1;BEH10237.1;WP_119332692.1;WP_254277928.1;UTG91234.1;UAC02515.1;QVW33723.1;BBA70267.1;AJY71225.1;ADI84603.1;AAR35145.1	Chromosome-partitioning;ParA;chromosome	0.373289	0.117786	0.970495	0	0	1620000	1300000	1550000	1590000	2200000	2000000
AAR35146.2;ADI84604.2;AJY71224.1;BBA70268.1;BEH10236.1;QVW33724.1;UAC02516.1;UTG91235.1;WP_316445018.1;WP_324310170.1;WP_331838585.1;WP_338041996.1	WP_338041996.1;WP_331838585.1;WP_324310170.1;WP_316445018.1;BEH10236.1;UTG91235.1;UAC02516.1;QVW33724.1;BBA70268.1;AJY71224.1;ADI84604.2;AAR35146.2	divergent;hypothetical;protein;sugar	0.0773493	0.855683	0.991862	0	0	440562	397392	552825	351624	390557	725199
AAR35147.1;ADI84605.1;BBA70269.1;QVW33725.1;UAC02517.1;UTG91236.1;WP_010942414.1;WP_119332694.1;WP_214302338.1	BEH10235.1;UTG91236.1;UAC02517.1;WP_214302338.1;QVW33725.1;WP_119332694.1;BBA70269.1;ADI84605.1;AAR35147.1;WP_010942414.1	hypothetical	-0.182215	0.700845	0.974322	0	0	444305	696036	670393	830702	397059	368127
AAR35148.1;ADI84606.2;AJY71222.1;QVW33726.1;UAC02518.1;UTG91237.1;WP_010942415.1	WP_324310638.1;WP_286352517.1;WP_010942415.1;BEH10234.1;UTG91237.1;UAC02518.1;QVW33726.1;AJY71222.1;ADI84606.2;AAR35148.1	AfsR/SARP;DNA-binding;DNA/RNA-binding	0.215827	0.0084153	0.875241	0	0	5700000	5270000	5390000	6230000	6180000	6590000
AAR35149.1;ADI84607.1;AJY71221.1;CBF87797.1;CBV02752.1;QVW33727.1;UAC02519.1;UTG91238.1;WP_010942416.1	WP_119332696.1;WP_010942416.1;WP_324310167.1;WP_286349621.1;BEH10233.1;UTG91238.1;UAC02519.1;QVW33727.1;BBA70271.1;AJY71221.1;ADI84607.1;AAR35149.1;CBV02752.1;CBF87797.1	S41;peptidase;periplasmic;unnamed	0.213381	0.260872	0.970495	0	0	32300000	24400000	23600000	32100000	31400000	29600000
AAR35150.1;ADI84608.2;AJY71220.1;QVW33728.1;UAC02520.1;UTG91239.1;WP_010942417.1	WP_119332697.1;WP_010942417.1;UTG91239.1;UAC02520.1;QVW33728.1;BBA70272.1;AJY71220.1;ADI84608.2;AAR35150.1	murein;peptidase;peptidoglycan;zinc	0.106404	0.649262	0.97248	0	0	1230000	826932	1380000	1220000	1210000	1270000
AAR35151.1;ADI84609.1;AJY71219.1;BEH10231.1;CBF68602.1;CBF89918.1;CBF93434.1;CBU93476.1;CBV03707.1;CBV06954.1;QVW33729.1;UAC02521.1;UTG91240.1;WP_010942418.1;WP_254277929.1;WP_324310163.1	WP_324310163.1;BEH10231.1;WP_254277929.1;WP_119332698.1;WP_010942418.1;UTG91240.1;UAC02521.1;QVW33729.1;BBA70273.1;AJY71219.1;ADI84609.1;AAR35151.1;CBV06954.1;CBU93476.1;CBV03707.1;CBF89918.1;CBF93434.1;CBF68602.1	cell;permease-like;unnamed	0.22777	0.404438	0.970495	0	0	868470	1040000	1030000	1310000	1300000	831017
AAR35152.1;ADI84610.1;AJY71218.1;QVW33730.1;UAC02522.1;UTG91241.1;WP_010942419.1	WP_286349618.1;BEH10230.1;WP_010942419.1;UTG91241.1;UAC02522.1;QVW33730.1;AJY71218.1;ADI84610.1;AAR35152.1	cell	0.268758	0.579718	0.970495	0	0	1870000	726211	2550000	1860000	2240000	2100000
AAR35153.2;ADI84611.1;AJY71217.1;BBA70275.1;QVW33731.1;UAC02523.1;UTG91242.1;WP_010942420.1;WP_119332700.1	WP_010942420.1;WP_119332700.1;UTG91242.1;UAC02523.1;QVW33731.1;BBA70275.1;AJY71217.1;ADI84611.1;AAR35153.2	Fimbrial;general;prepilin-type;type	0.809448	0.0505424	0.970495	0	0	160466	101346	199136	258242	277418	272170
AAR35155.1;ADI84613.1;AJY71216.1;QVW33732.1;UAC02524.1;UTG91243.1;WP_010942422.1	WP_119332701.1;WP_286349615.1;WP_010942422.1;BEH10227.1;UTG91243.1;UAC02524.1;QVW33732.1;BBA70277.1;AJY71216.1;ADI84613.1;AAR35155.1	tetratricopeptide;type	-0.124438	0.521191	0.970495	0	0	3880000	4910000	5610000	4360000	4110000	4740000
AAR35156.1;ADI84614.2;AJY71215.1;BBA70278.1;QVW33733.1;UAC02525.1;UTG91244.1;WP_010942423.1;WP_119332702.1	BEH10226.1;UTG91244.1;UAC02525.1;QVW33733.1;WP_119332702.1;BBA70278.1;AJY71215.1;ADI84614.2;AAR35156.1;WP_010942423.1	hypothetical;type	0.375571	0.276877	0.970495	0	0	1090000	942795	950202	1680000	1180000	1010000
AAR35157.1;ADI84615.2;AJY71214.1;BEH10225.1;QVW33734.1;UAC02526.1;UTG91245.1;WP_010942424.1;WP_324310156.1	WP_324310156.1;WP_010942424.1;BEH10225.1;UTG91245.1;UAC02526.1;QVW33734.1;AJY71214.1;ADI84615.2;AAR35157.1	MULTISPECIES:;pilus;type	-0.13863	0.688952	0.973029	0	1	390519	668326	427522	342027	536859	471302
AAR35158.1;ADI84616.1;AJY71213.1;BBA70280.1;BEH10224.1;QVW33735.1;UAC02527.1;UTG91246.1;WP_010942425.1;WP_286349612.1	WP_286349612.1;BEH10224.1;UTG91246.1;UAC02527.1;QVW33735.1;WP_010942425.1;BBA70280.1;AJY71213.1;ADI84616.1;AAR35158.1	MULTISPECIES:;PilN;fimbrial;hypothetical;type	0.752412	0.0863641	0.970495	0	0	2780000	2840000	3670000	4000000	5120000	6530000
AAR35159.1;ADI84617.1;AJY71212.1;BBA70281.1;QVW33736.1;UAC02528.1;UTG91247.1;WP_010942426.1;WP_119332703.1	WP_119332703.1;WP_010942426.1;UTG91247.1;UAC02528.1;QVW33736.1;BBA70281.1;AJY71212.1;ADI84617.1;AAR35159.1	hypothetical;pilus;type	0.134206	0.708655	0.974322	0	0	2290000	3020000	1460000	3080000	2200000	2150000
AAR35160.1;ADI84618.1;AJY71211.1;BBA70282.1;QVW33737.1;UAC02529.1;UTG91248.1;WP_010942427.1;WP_214302339.1	WP_324310151.1;WP_286349610.1;BEH10222.1;WP_214302339.1;WP_010942427.1;UTG91248.1;UAC02529.1;QVW33737.1;BBA70282.1;AJY71211.1;ADI84618.1;AAR35160.1	Flp;GspE/PulE;Type;pilus;type	-0.232767	0.497105	0.970495	0	0	4770000	7010000	5200000	3050000	5880000	5520000
AAR35161.1;ADI84619.1;AJY71210.1;BBA70283.1;QVW33738.1;UAC02530.1;UTG91249.1;WP_010942428.1;WP_119332704.1	WP_286349609.1;WP_119332704.1;WP_010942428.1;BEH10221.1;UTG91249.1;UAC02530.1;QVW33738.1;BBA70283.1;AJY71210.1;ADI84619.1;AAR35161.1	Putative;type	0.215154	0.399926	0.970495	0	0	2190000	1910000	2180000	1830000	2900000	2560000
AAR35165.2;ADI84623.1;AJY71206.1;BBA70287.1;BEH10217.1;QVW33742.1;UAC02534.1;UTG91253.1;WP_010942432.1;WP_119332708.1;WP_254277931.1;WP_286349605.1;WP_324310143.1	WP_324310143.1;WP_254277931.1;WP_119332708.1;WP_286349605.1;WP_010942432.1;BEH10217.1;UTG91253.1;UAC02534.1;QVW33742.1;BBA70287.1;AJY71206.1;AAR35165.2;ADI84623.1	6-bladed;MULTISPECIES:;NHL;Serine/threonine-protein;hypothetical	-0.541377	0.146717	0.970495	0	0	479569	483330	677948	391479	486767	249204
AAR35166.1;ADI84624.1;AJY71204.1;QVW33743.1;UAC02535.1;UTG91254.1;WP_010942433.1	WP_324310141.1;BEH10215.1;UTG91254.1;UAC02535.1;QVW33743.1;WP_119332710.1;BBA70289.1;WP_010942433.1;AJY71204.1;ADI84624.1;AAR35166.1	GDP-mannose--undecaprenyl-phosphate;dolichyl-phosphate;polyprenol	-0.395487	0.0819447	0.970495	0	0	800308	990710	992290	834279	586961	694722
AAR35167.1;ADI84625.2;AJY71203.1;QVW33744.1;UAC02536.1;UTG91255.1;WP_010942434.1	UTG91255.1;UAC02536.1;QVW33744.1;WP_119332711.1;WP_010942434.1;BBA70290.1;AJY71203.1;ADI84625.2;AAR35167.1	ATP-dependent;DNA-binding;endopeptidase	-0.0723586	0.683574	0.973029	0	0	4270000	3110000	3250000	3300000	3480000	3330000
AAR35176.1;ADI84634.1;AJY71145.1;BBA70298.1;QVW33753.1;UAC02545.1;UTG91264.1;WP_010942444.1	BEH10205.1;UTG91264.1;UAC02545.1;QVW33753.1;WP_010942444.1;BBA70298.1;AJY71145.1;ADI84634.1;AAR35176.1	Aspartate;aspartate	0.13156	0.251483	0.970495	0	0	6590000	7350000	5960000	6990000	7350000	7460000
AAR35178.1;ADI84636.1;AJY71143.1;UAC02547.1;UTG91266.1	UTG91266.1;UAC02547.1;QVW33755.1;WP_119332718.1;BBA70300.1;AJY71143.1;ADI84636.1;AAR35178.1	CBS;membrane	0.0310559	0.889755	0.995781	0	0	3550000	2680000	4340000	3410000	3840000	3550000
AAR35179.1;ADI84637.1;AJY71142.1;QVW33756.1;UAC02548.1;UTG91267.1;WP_214302340.1	WP_214302340.1;UTG91267.1;UAC02548.1;QVW33756.1;AJY71142.1;ADI84637.1;AAR35179.1	ATP-binding;NAD(P)H-hydrate;bifunctional	0.122522	0.719867	0.975021	0	0	1260000	1060000	2080000	1550000	1720000	1520000
AAR35185.1;ADI84643.2;AJY71979.1;BBA70307.1;QVW36944.1;UAC05818.1;UTG94455.1;WP_010942453.1;WP_014551654.1;WP_235044855.1	UTG94455.1;WP_235044855.1;UAC05818.1;QVW36944.1;WP_014551654.1;WP_010942453.1;BBA70307.1;AJY71979.1;ADI84643.2;AAR35185.1	Dihydropteroate;dihydropteroate	-0.0422939	0.883712	0.995781	1	0	522504	670596	775563	708520	756686	446582
AAR35186.2;AJY71136.1;CBF59700.1;CBF67046.1;CBU84944.1;CBU91919.1;UAC02554.1;UTG91273.1;WP_010942454.1	WP_014551655.1;WP_010942454.1;BEH10195.1;UTG91273.1;UAC02554.1;QVW33762.1;BBA70308.1;AJY71136.1;AAR35186.2;ADI84644.1;CBU91919.1;CBU84944.1;CBF67046.1;CBF59700.1	ATP-dependent;cell;unnamed	0.0984594	0.130583	0.970495	0	0	10800000	9890000	10600000	11700000	11000000	10800000
AAR35190.1;ADI84648.1;AJY71133.1;BBA70312.1;BEH10191.1;QVW33765.1;UAC02557.1;UTG91276.1	BEH10191.1;UTG91276.1;UAC02557.1;QVW33765.1;BBA70312.1;AJY71133.1;ADI84648.1;AAR35190.1	hypothetical	1.06765	0.208695	0.970495	0	0	181313	102224	295932	345997	235939	632640
AAR35192.1;ADI84650.1;AJY71131.1;BBA70314.1;BEH10189.1;QVW33767.1;UAC02559.1;UTG91278.1;WP_010942460.1	WP_010942460.1;BEH10189.1;UTG91278.1;UAC02559.1;QVW33767.1;BBA70314.1;AJY71131.1;ADI84650.1;AAR35192.1	NAD-dependent;SDR;UDP-glucose;UDP-glucuronate;UDP-glucuronic	0.377404	0.185855	0.970495	0	0	696839	465232	608922	938630	671921	689973
AAR35193.1;ADI84651.1;AJY71130.1;BBA70315.1;BEH10188.1;QVW33768.1;UAC02560.1;UTG91279.1;WP_010942461.1;WP_014551658.1;WP_119332729.1;WP_286352479.1	WP_286352479.1;WP_119332729.1;BEH10188.1;WP_014551658.1;WP_010942461.1;UTG91279.1;UAC02560.1;QVW33768.1;BBA70315.1;AJY71130.1;ADI84651.1;AAR35193.1	MULTISPECIES:;UDP-glucose;UDP-glucose/GDP-mannose	-0.123834	0.439146	0.970495	0	0	4900000	4560000	3670000	3820000	3910000	4320000
AAR35194.1;ADI84652.2;AJY71129.1;QVW33769.1;UAC02561.1;UTG91280.1;WP_010942462.1	BEH10187.1;UTG91280.1;UAC02561.1;QVW33769.1;WP_119332730.1;WP_010942462.1;BBA70316.1;AJY71129.1;ADI84652.2;AAR35194.1	Slp;membrane;outer	-0.264704	0.659138	0.97248	0	1	1030000	332221	671630	395872	498173	798870
AAR35197.1;ADI84655.1;AJY71126.1;QVW33772.1;UAC02564.1;UTG91283.1;WP_010942465.1	WP_324310110.1;BEH10184.1;UTG91283.1;UAC02564.1;QVW33772.1;WP_119332733.1;WP_010942465.1;BBA70319.1;AJY71126.1;ADI84655.1;AAR35197.1	[protein-PII];nitrogen;uridylyltransferase	0.179893	0.412683	0.970495	0	0	2070000	1890000	2290000	1840000	2550000	2690000
AAR35198.2;ADI84656.1;AJY71125.1;UAC02565.1;WP_010942466.1	WP_324310108.1;WP_254277932.1;WP_214302341.1;WP_119332734.1;WP_010942466.1;BEH10183.1;UTG91284.1;UAC02565.1;QVW33773.1;BBA70320.1;AJY71125.1;AAR35198.2;ADI84656.1	N-acetylmuramoyl-L-alanine;N-acetylmuramyl-L-alanine	-0.137504	0.616964	0.970495	0	0	1900000	1160000	1340000	1430000	1200000	1370000
AAR35202.1;ADI84659.1;AJY71108.1;BBA70323.1;BEH10180.1;QVW33776.1;UAC02568.1;UTG91287.1;WP_010942469.1;WP_014551661.1;WP_119332737.1;WP_254277934.1	WP_254277934.1;WP_119332737.1;WP_014551661.1;WP_010942469.1;BEH10180.1;UTG91287.1;UAC02568.1;QVW33776.1;BBA70323.1;AJY71108.1;ADI84659.1;AAR35202.1	CDP-diacylglycerol--glycerol-3-phosphate	-0.28173	0.487686	0.970495	0	0	2660000	1660000	2670000	2760000	1510000	1480000
AAR35203.1;ADI84660.1;AJY71107.1;BBA70324.1;BEH10179.1;QVW33777.1;UAC02569.1;UTG91288.1;WP_010942470.1;WP_119332738.1;WP_286352471.1	WP_286352471.1;WP_119332738.1;WP_010942470.1;BEH10179.1;UTG91288.1;UAC02569.1;QVW33777.1;BBA70324.1;AJY71107.1;ADI84660.1;AAR35203.1	MULTISPECIES:;Soluble;lytic	-0.872019	0.164147	0.970495	1	0	178109	210518	348733	149163	130904	122813
AAR35204.1;AJY71106.1;QVW33778.1;UAC02570.1;UTG91289.1;WP_010942471.1	BEH10178.1;UTG91289.1;UAC02570.1;QVW33778.1;WP_119332739.1;WP_010942471.1;WP_014551662.1;BBA70325.1;AJY71106.1;ADI84661.1;AAR35204.1	L-aspartate	-0.0681715	0.698698	0.974322	0	0	3090000	3020000	3640000	3070000	3630000	2600000
AAR35205.1;BBA70326.1;UAC02571.1;UTG91290.1;WP_010942472.1;WP_119332740.1	WP_014551663.1;WP_010942472.1;WP_324310101.1;BEH10177.1;UTG91290.1;UAC02571.1;QVW33779.1;WP_119332740.1;BBA70326.1;AJY71105.1;ADI84662.1;AAR35205.1	T-protein;chorismate	0.163709	0.564923	0.970495	0	0	1310000	2160000	1440000	1530000	1910000	2060000
AAR35206.1;ADI84663.1;AJY71104.1;BBA70327.1;BEH10176.1;QVW33780.1;UAC02572.1;UTG91291.1	BEH10176.1;UTG91291.1;UAC02572.1;QVW33780.1;BBA70327.1;AJY71104.1;ADI84663.1;AAR35206.1	hypothetical	0.493422	0.239312	0.970495	0	0	4490000	6660000	10700000	10000000	9160000	11600000
AAR35207.1;AJY71103.1;BBA70328.1;QVW33781.1;UAC02573.1;UTG91292.1;WP_010942474.1;WP_045668199.1;WP_119332741.1	WP_324310098.1;BEH10175.1;UTG91292.1;UAC02573.1;QVW33781.1;WP_010942474.1;WP_014551664.1;WP_045668199.1;WP_119332741.1;BBA70328.1;AJY71103.1;ADI84664.1;AAR35207.1	AmmeMemoRadiSam;MEMO-like;dioxygenase;hypothetical	0.113901	0.527459	0.970495	0	0	819737	764568	803956	725326	1020000	839131
AAR35208.1;ADI84665.1;AJY71102.1;BBA70329.1;BEH10174.1;QVW33782.1;UAC02574.1;UTG91293.1;WP_010942475.1;WP_119332742.1;WP_324310096.1	WP_324310096.1;BEH10174.1;UTG91293.1;WP_119332742.1;WP_010942475.1;UAC02574.1;QVW33782.1;BBA70329.1;AJY71102.1;ADI84665.1;AAR35208.1	SMC-Scp;chromosome;hypothetical;segregation	0.592003	0.510354	0.970495	0	0	93567	81861	200402	163702	331605	71196
AAR35209.2;ADI84666.1;AJY71101.1;QVW33783.1;UAC02575.1;UTG91294.1;WP_010942476.1;WP_324310093.1	WP_286352467.1;WP_119332743.1;WP_010942476.1;WP_324310093.1;BEH10173.1;UTG91294.1;UAC02575.1;QVW33783.1;BBA70330.1;AJY71101.1;ADI84666.1;AAR35209.2	chromosome;segregation;segregation/condensation	0.414399	0.259654	0.970495	0	0	1670000	1630000	2350000	1880000	2410000	3240000
AAR35210.1;ADI84667.1;AJY71100.1;BBA70331.1;QVW33784.1;UAC02576.1;UTG91295.1;WP_010942477.1;WP_119332744.1	WP_324310091.1;WP_119332744.1;WP_010942477.1;BEH10172.1;UTG91295.1;UAC02576.1;QVW33784.1;BBA70331.1;AJY71100.1;ADI84667.1;AAR35210.1	Tryptophan--tRNA;tryptophan--tRNA;tryptophanyl-tRNA	0.452687	0.0190015	0.948398	0	0	6100000	6250000	6750000	9070000	7850000	9220000
AAR35212.1;ADI84669.1;AJY71098.1;BBA70333.1;CBN69842.1;QVW33786.1;UAC02578.1;UTG91297.1;WP_010942479.1;WP_119332746.1	UTG91297.1;UAC02578.1;QVW33786.1;WP_010942479.1;WP_119332746.1;BBA70333.1;AJY71098.1;ADI84669.1;AAR35212.1;CBN69842.1	Glutamine;glutamine;type;unnamed	0.0351894	0.899007	0.9965	0	0	26900000	19200000	18700000	26500000	23300000	16600000
AAR35213.1;AJY71097.1;BBA70334.1;BEH10169.1;CBF99782.1;CBG07994.1;CBV13302.1;CBV21516.1;QVW33787.1;UAC02579.1;UTG91298.1	WP_014551665.1;BEH10169.1;UTG91298.1;UAC02579.1;QVW33787.1;BBA70334.1;AJY71097.1;ADI84670.1;AAR35213.1;CBV21516.1;CBV13302.1;CBG07994.1;CBF99782.1	Nitrogen;P-II;nitrogen;unnamed	0.215401	0.230033	0.970495	0	0	6150000	7020000	5150000	7000000	6400000	7870000
AAR35215.1;ADI84672.1;AJY71095.1;BBA70336.1;BEH10167.1;QVW33789.1;UAC02581.1;UTG91300.1;WP_010942482.1;WP_119332748.1;WP_254277935.1	WP_254277935.1;WP_119332748.1;WP_010942482.1;BEH10167.1;UTG91300.1;UAC02581.1;QVW33789.1;BBA70336.1;AJY71095.1;ADI84672.1;AAR35215.1	ATP-dependent;hypothetical	-0.840094	0.481199	0.970495	1	0	694395	229817	1680000	198105	889414	367213
AAR35216.1;ADI84673.1;AJY71094.1;QVW33790.1;UAC02582.1;UTG91301.1;WP_010942483.1	WP_010942483.1;UTG91301.1;UAC02582.1;QVW33790.1;AJY71094.1;ADI84673.1;AAR35216.1	HAD;phosphatase/phosphohexomutase-related	-0.856091	0.210547	0.970495	0	0	2200000	4920000	2890000	1460000	2880000	1190000
AAR35219.2;UAC02585.1;WP_010942486.1	WP_324310078.1;WP_119332750.1;WP_254277936.1;WP_286352460.1;WP_010942486.1;WP_214302342.1;WP_014551668.1;BEH10163.1;UTG91304.1;UAC02585.1;QVW33793.1;BBA70340.1;AJY71091.1;AAR35219.2;ADI84676.1	SLBB;periplasmic	-0.0836579	0.623658	0.970495	0	0	4140000	3320000	3190000	3060000	3190000	3800000
AAR35221.1;ADI84678.1;AJY71089.1;BBA70342.1;BEH10161.1;QVW33795.1;UAC02587.1;UTG91306.1;WP_010942488.1;WP_014551670.1;WP_119332751.1;WP_214302343.1;WP_324310075.1	WP_119332751.1;WP_324310075.1;BEH10161.1;WP_214302343.1;WP_010942488.1;UTG91306.1;UAC02587.1;QVW33795.1;WP_014551670.1;BBA70342.1;AJY71089.1;ADI84678.1;AAR35221.1	IPT/TIG;hypothetical;transcription	-0.00581229	0.988686	1	0	0	2220000	2420000	992647	1490000	1990000	2130000
AAR35222.1;BBA70343.1;UAC02588.1;WP_010942489.1;WP_119332752.1;WP_316445019.1	WP_324310073.1;WP_316445019.1;BEH10160.1;UTG91307.1;UAC02588.1;WP_214302344.1;QVW33796.1;WP_119332752.1;BBA70343.1;WP_014551671.1;WP_010942489.1;AJY71088.1;ADI84679.2;AAR35222.1	capsule;hypothetical	0.0302311	0.938006	1	0	0	292817	221308	489194	316568	352243	355754
AAR35227.1;UAC02591.1;WP_164930428.1	WP_167447399.1;WP_164930428.1;UAC02591.1;BBA70345.1;AAR35227.1	glycosyl;hypothetical	-0.199417	0.611468	0.970495	0	0	1110000	849940	1690000	868742	1020000	1290000
AAR35235.1;ADI84697.1;AJY68110.1;BEH10142.1;QVW33816.1;UAC02602.1;UTG91324.1;WP_010942504.1;WP_014551690.1;WP_214302364.1	WP_014551690.1;WP_010942504.1;WP_214302364.1;BEH10142.1;UTG91324.1;UAC02602.1;QVW33816.1;AJY68110.1;ADI84697.1;AAR35235.1	2-oxoacid:acceptor;2-oxoacid:ferredoxin;MULTISPECIES:	0.250502	0.344714	0.970495	0	0	1470000	990250	1230000	1360000	1790000	1240000
AAR35236.1;ADI84698.1;AJY68111.1;BBA70357.1;BEH10141.1;QVW33817.1;UAC02603.1;UTG91325.1;WP_010942505.1;WP_119332764.1;WP_214302365.1	WP_214302365.1;WP_010942505.1;WP_119332764.1;BEH10141.1;UTG91325.1;UAC02603.1;QVW33817.1;BBA70357.1;AJY68111.1;ADI84698.1;AAR35236.1	2-oxoacid:ferredoxin;2-oxoglutarate;MULTISPECIES:;thiamine	0.501735	0.0819725	0.970495	0	0	697059	1070000	733090	1080000	1120000	1340000
AAR35237.2;AJY68112.1;UAC02604.1;UTG91326.1;WP_010942506.1;WP_045667146.1	BEH10140.1;UTG91326.1;UAC02604.1;QVW33818.1;WP_119332765.1;WP_045667146.1;WP_010942506.1;BBA70358.1;AJY68112.1;ADI84699.1;AAR35237.2	2-ketoisovalerate;2-oxoacid:ferredoxin;3-methyl-2-oxobutanoate	0.22542	0.451686	0.970495	0	0	2960000	1530000	2310000	2670000	2660000	2620000
AAR35239.1;AJY68114.1;UAC02606.1;UTG91328.1;WP_010942508.1	UTG91328.1;UAC02606.1;WP_010942508.1;AJY68114.1;AAR35239.1	MucR;transcriptional	0	1	1	0	0	17900000	16100000	19200000	16000000	20800000	16400000
AAR35242.1;ADI84704.1;AJY68117.1;BEH10135.1;UAC02609.1;UTG91331.1;WP_010942511.1	WP_119332770.1;WP_010942511.1;WP_214302368.1;BEH10135.1;UTG91331.1;UAC02609.1;QVW33823.1;BBA70363.1;AJY68117.1;ADI84704.1;AAR35242.1	MULTISPECIES:;PhoH;PhoH-related	0.060833	0.593993	0.970495	0	0	6390000	5170000	5390000	6070000	5610000	6000000
AAR35243.2;ADI84705.1;AJY68118.1;BBA70364.1;BEH10134.1;QVW36947.1;UAC05822.1;UTG94458.1;WP_010942512.1;WP_014551695.1;WP_232008881.1;WP_238525056.1	BEH10134.1;UTG94458.1;WP_238525056.1;WP_232008881.1;UAC05822.1;QVW36947.1;BBA70364.1;AJY68118.1;WP_010942512.1;AAR35243.2;ADI84705.1;WP_014551695.1	hypothetical;lipoprotein;lipoprotein,	0.324884	0.370853	0.970495	0	1	787576	357610	625487	603772	797158	816951
AAR35244.1;AJY68119.1;QVW33824.1;UAC02610.1;WP_010942513.1	WP_014551696.1;WP_010942513.1;WP_286352456.1;WP_324310033.1;WP_254277954.1;BEH10133.1;UTG91332.1;UAC02610.1;QVW33824.1;AJY68119.1;ADI84706.1;AAR35244.1	aminotransferase;cysteine	-0.158846	0.536487	0.970495	0	0	990781	882013	827875	1050000	651499	717602
AAR35245.1;QVW33825.1;UAC02611.1;WP_010942514.1;WP_214302369.1	WP_214302369.1;WP_010942514.1;UAC02611.1;QVW33825.1;AAR35245.1	lipoprotein;lipoprotein,;right-handed	0.343093	0.0339022	0.948398	0	0	1320000	1300000	1440000	1760000	1840000	1550000
AAR35246.2;ADI84708.1;AJY68121.1;BBA70367.1;QVW33826.1;UAC02612.1;UTG91334.1;WP_010942515.1;WP_119332774.1;WP_254277956.1	WP_286352454.1;WP_324310029.1;BEH10131.1;WP_254277956.1;WP_119332774.1;WP_010942515.1;UTG91334.1;UAC02612.1;QVW33826.1;BBA70367.1;AJY68121.1;AAR35246.2;ADI84708.1	Phytochrome-like;diguanylate;sensor	-0.161463	0.599909	0.970495	0	0	1400000	1440000	2260000	1450000	1750000	1360000
AAR35247.1;ADI84709.1;AJY68122.1;BBA70368.1;BEH10130.1;QVW33827.1;UAC02613.1;UTG91335.1;WP_010942516.1;WP_119332775.1;WP_286352453.1	WP_286352453.1;BEH10130.1;UTG91335.1;UAC02613.1;QVW33827.1;WP_119332775.1;WP_010942516.1;BBA70368.1;AJY68122.1;ADI84709.1;AAR35247.1	Vitamin;ribonucleoside;ribonucleotide-diphosphate;vitamin	0.0806394	0.64568	0.972476	0	0	10500000	11300000	8120000	10600000	9440000	11600000
AAR35248.1;ADI84710.1;AJY68123.1;BEH10129.1;QVW33828.1;UAC02614.1;UTG91336.1;WP_010942517.1;WP_014551698.1;WP_286352452.1	WP_010942517.1;WP_286352452.1;WP_014551698.1;WP_119332776.1;BEH10129.1;UTG91336.1;UAC02614.1;QVW33828.1;BBA70369.1;AJY68123.1;ADI84710.1;AAR35248.1	DUF4410;MULTISPECIES:;hypothetical	0.0516749	0.740052	0.981652	0	0	8350000	7530000	6880000	6690000	8000000	8900000
AAR35249.1;UAC02615.1;WP_010942518.1	WP_286352451.1;BEH10128.1;UTG91337.1;UAC02615.1;QVW33829.1;WP_014551699.1;WP_010942518.1;AJY68124.1;ADI84711.1;AAR35249.1	M3;oligoendopeptidase	0.108797	0.373749	0.970495	0	0	1400000	1130000	1300000	1410000	1260000	1460000
AAR35252.1;ADI84714.1;AJY68126.1;BBA70373.1;BEH10124.1;QVW33831.1;UAC02618.1;UTG91339.1;WP_010942521.1;WP_119332779.1;WP_214302370.1;WP_286352448.1	WP_119332779.1;WP_010942521.1;WP_286352448.1;WP_214302370.1;BEH10124.1;UTG91339.1;UAC02618.1;QVW33831.1;BBA70373.1;AJY68126.1;ADI84714.1;AAR35252.1	MULTISPECIES:;cache;hypothetical	-0.390071	0.418171	0.970495	0	0	6800000	13000000	8270000	5380000	5740000	10300000
AAR35253.1;ADI84715.1;AJY68127.1;UAC02619.1;UTG91340.1;WP_010942522.1;WP_014551700.1;WP_223106382.1	WP_286352447.1;WP_119332780.1;WP_223106382.1;WP_014551700.1;WP_010942522.1;BEH10123.1;UTG91340.1;UAC02619.1;QVW33832.1;BBA70374.1;AJY68127.1;ADI84715.1;AAR35253.1	2-nitropropane;NAD(P)H-dependent;nitronate;oxidoreductase,	0.32749	0.0786608	0.970495	0	0	4840000	4980000	6230000	6530000	7420000	6190000
AAR35254.1;ADI84716.2;AJY68128.1;BBA70375.1;QVW33833.1;UAC02620.1;UTG91341.1;WP_193360255.1	WP_193360255.1;UTG91341.1;UAC02620.1;QVW33833.1;BBA70375.1;AJY68128.1;ADI84716.2;AAR35254.1	HAMP;Signal-transduction;histidine;sensor	0.0303723	0.955349	1	0	0	691219	1350000	1820000	743369	1340000	1860000
AAR35255.1;ADI84717.1;AJY68129.1;BBA70376.1;BEH10121.1;QVW33834.1;UAC02621.1;UTG91342.1;WP_010942524.1;WP_119332781.1;WP_286352445.1	WP_286352445.1;WP_119332781.1;WP_010942524.1;BEH10121.1;UTG91342.1;UAC02621.1;QVW33834.1;BBA70376.1;AJY68129.1;ADI84717.1;AAR35255.1	Alkaline;response;transcriptional;winged-helix	-0.776171	0.312462	0.970495	0	0	156109	511366	320675	228371	163678	184946
AAR35257.1;ADI84719.1;AJY68131.1;BBA70378.1;BEH10119.1;QVW33836.1;UAC02623.1;UTG91344.1;WP_010942526.1;WP_119332783.1;WP_214302371.1;WP_254277957.1;WP_286352443.1	WP_286352443.1;WP_254277957.1;WP_214302371.1;WP_119332783.1;WP_010942526.1;BEH10119.1;UTG91344.1;UAC02623.1;QVW33836.1;BBA70378.1;AJY68131.1;ADI84719.1;AAR35257.1	Phosphoenolpyruvate-protein;phosphoenolpyruvate--protein;phosphoenolpyruvate-protein	0.236147	0.314169	0.970495	0	0	1070000	1090000	1270000	1110000	1300000	1630000
AAR35259.1;ADI84721.2;AJY71816.1;BBA70380.1;BEH10117.1;QVW33838.1;UAC02625.1;UTG91346.1	BEH10117.1;UTG91346.1;UAC02625.1;QVW33838.1;BBA70380.1;AJY71816.1;ADI84721.2;AAR35259.1	PTS;phosphotransferase	0.34645	0.611879	0.970495	0	0	1550000	1550000	2500000	1780000	4000000	1340000
AAR35262.1;ADI84724.1;AJY68135.1;CBF76825.1;CBU97811.1;QVW33841.1;UAC02628.1;UTG91349.1;WP_010942531.1	WP_010942531.1;BEH10114.1;UTG91349.1;UAC02628.1;QVW33841.1;AJY68135.1;ADI84724.1;AAR35262.1;CBU97811.1;CBF76825.1	pseudouridine;ribosomal;ribosome;ribosome-associated;unnamed	0.0281707	0.844355	0.991407	0	0	21900000	27300000	21800000	26500000	23700000	22200000
AAR35263.1;ADI84725.1;AJY68136.1;BBA70384.1;QVW33842.1;UAC02629.1;UTG91350.1;WP_010942532.1;WP_014551702.1;WP_119332787.1	UTG91350.1;UAC02629.1;QVW33842.1;WP_119332787.1;WP_014551702.1;WP_010942532.1;BBA70384.1;AJY68136.1;ADI84725.1;AAR35263.1	RNA	0.342602	0.231868	0.970495	0	0	3580000	3170000	4890000	3990000	5810000	4960000
AAR35264.1;ADI84726.1;AJY68137.1;BBA70385.1;BEH10112.1;QVW33843.1;UAC02630.1;UTG91351.1;WP_010942533.1;WP_014551703.1;WP_286352438.1;WP_324310008.1	WP_324310008.1;WP_286352438.1;WP_014551703.1;WP_010942533.1;BEH10112.1;UTG91351.1;UAC02630.1;QVW33843.1;BBA70385.1;AJY68137.1;ADI84726.1;AAR35264.1	LPS;Lipopolysaccharide;lipopolysaccharide;sugar	-0.258674	0.500268	0.970495	0	0	2220000	2450000	3920000	2240000	3010000	1930000
AAR35265.1;ADI84727.1;AJY68138.1;BBA70386.1;QVW33844.1;UAC02631.1;UTG91352.1;WP_010942534.1	WP_010942534.1;BEH10111.1;UTG91352.1;UAC02631.1;QVW33844.1;BBA70386.1;AJY68138.1;ADI84727.1;AAR35265.1	Lipopolysaccharide;lipopolysaccharide;sugar	0.00469185	0.984138	1	0	0	702405	1170000	986593	894686	1010000	963625
AAR35267.1;BBA70388.1;UAC02633.1;WP_010942536.1;WP_119332788.1	WP_119332788.1;WP_286352435.1;WP_014551704.1;WP_010942536.1;BEH10109.1;UTG91354.1;UAC02633.1;QVW33846.1;BBA70388.1;AJY68140.1;ADI84729.1;AAR35267.1	Cyclic;HD;response	0.21424	0.0165068	0.948398	0	0	1430000	1480000	1400000	1610000	1640000	1750000
AAR35268.2;ADI84730.2;AJY71817.1;BBA70389.1;BEH10108.1;QVW36949.1;UAC05823.1;UTG94460.1;WP_010942537.1;WP_119334075.1;WP_286352515.1;WP_324310635.1	WP_324310635.1;WP_119334075.1;WP_286352515.1;WP_010942537.1;BEH10108.1;UTG94460.1;UAC05823.1;QVW36949.1;BBA70389.1;AJY71817.1;AAR35268.2;ADI84730.2	3-deoxy-D-manno-octulosonate;3-deoxy-D-manno-octulosonate-8-phosphate;HAD;KdsC;MULTISPECIES:	-0.122484	0.77445	0.988715	0	0	2430000	5250000	4360000	2480000	3830000	4750000
AAR35269.1;ADI84731.1;AJY68141.1;QVW33847.1;UAC02634.1;UTG91355.1;WP_010942538.1	WP_119332789.1;WP_010942538.1;UTG91355.1;UAC02634.1;QVW33847.1;BBA70390.1;AJY68141.1;ADI84731.1;AAR35269.1	D-arabinose;KpsF/GutQ;arabinose-5-phosphate	0.00688639	0.966362	1	0	0	2380000	3260000	2720000	2580000	2760000	3060000
AAR35273.1;ADI84735.1;AJY68145.1;QVW33851.1;UAC02638.1;UTG91359.1;WP_010942542.1	UTG91359.1;UAC02638.1;QVW33851.1;WP_119332792.1;BBA70394.1;AJY68145.1;ADI84735.1;AAR35273.1;WP_010942542.1	MTA/SAH;nucleosidase;nucleoside	-0.613448	0.0773284	0.970495	1	1	270532	370572	404425	232383	257490	193519
AAR35274.1;ADI84736.1;AJY68146.1;BBA70395.1;QVW33852.1;UAC02639.1;UTG91360.1;WP_010942543.1;WP_119332793.1	WP_119332793.1;WP_010942543.1;UTG91360.1;UAC02639.1;QVW33852.1;BBA70395.1;AJY68146.1;ADI84736.1;AAR35274.1	carotenoid;hypothetical;membrane	0.323275	0.552818	0.970495	0	0	759581	366528	427471	945529	592236	406024
AAR35275.1;ADI84737.1;AJY68147.1;QVW33853.1;UAC02640.1;UTG91361.1;WP_010942544.1	WP_286352430.1;WP_010942544.1;WP_119332794.1;BEH10101.1;UTG91361.1;UAC02640.1;QVW33853.1;BBA70396.1;AJY68147.1;ADI84737.1;AAR35275.1	ABC;MCE;MlaD	0.0675528	0.720676	0.975021	0	0	2430000	3020000	3520000	2760000	3260000	3380000
AAR35276.1;ADI84738.1;AJY68148.1;BBA70397.1;BEH10100.1;QVW33854.1;UAC02641.1;UTG91362.1;WP_010942545.1;WP_119332795.1;WP_286352429.1	WP_286352429.1;WP_119332795.1;WP_010942545.1;BEH10100.1;UTG91362.1;UAC02641.1;QVW33854.1;BBA70397.1;AJY68148.1;ADI84738.1;AAR35276.1	ABC;MULTISPECIES:;MlaE;membrane;putative	0.35698	0.597441	0.970495	0	0	695338	412344	650616	362802	649124	1240000
AAR35277.1;ADI84739.1;AJY68149.1;QVW33855.1;UAC02642.1;UTG91363.1;WP_010942546.1;WP_045667150.1	UTG91363.1;UAC02642.1;QVW33855.1;WP_045667150.1;AJY68149.1;ADI84739.1;AAR35277.1;WP_010942546.1	hypothetical	0.303209	0.208801	0.970495	0	0	1400000	1810000	2220000	2350000	2080000	2270000
AAR35278.1;ADI84740.1;AJY68150.1;BBA70399.1;BEH10098.1;QVW33856.1;UAC02643.1;UTG91364.1;WP_010942547.1;WP_119332797.1;WP_286352427.1;WP_324309993.1	WP_286352427.1;WP_119332797.1;WP_010942547.1;WP_324309993.1;BEH10098.1;UTG91364.1;UAC02643.1;QVW33856.1;BBA70399.1;AJY68150.1;ADI84740.1;AAR35278.1	3-isopropylmalate;MULTISPECIES:;isopropylmalate/citramalate	0.451785	0.0955665	0.970495	0	0	12900000	14600000	9130000	18500000	17200000	14400000
AAR35280.1;ADI84742.1;AJY68152.1;BEH10096.1;QVW33858.1;UAC02645.1;UTG91366.1;WP_010942549.1;WP_254277958.1	WP_254277958.1;WP_119332799.1;WP_010942549.1;BEH10096.1;UTG91366.1;UAC02645.1;QVW33858.1;BBA70401.1;AJY68152.1;ADI84742.1;AAR35280.1	DNA-binding;Rossmann;TIGR00730	0.504341	0.361365	0.970495	0	0	781267	1370000	501009	872189	1160000	1730000
AAR35281.1;ADI84743.1;AJY68153.1;BBA70402.1;BEH10095.1;CBF71954.1;CBU95458.1;QVW33859.1;UAC02646.1;UTG91367.1;WP_010942550.1	WP_010942550.1;BEH10095.1;UTG91367.1;UAC02646.1;QVW33859.1;BBA70402.1;AJY68153.1;ADI84743.1;AAR35281.1;CBU95458.1;CBF71954.1	Cold;MULTISPECIES:;cold;cold-shock;unnamed	-0.268043	0.494657	0.970495	0	0	23300000	21800000	35700000	23500000	29000000	14600000
AAR35282.1;ADI84744.1;AJY68154.1;CAW33860.1;CAW37506.1;CBB99894.1;CBC03378.1;QVW33860.1;UAC02647.1;UTG91368.1;WP_010942551.1	UTG91368.1;UAC02647.1;QVW33860.1;WP_010942551.1;WP_119332800.1;BBA70403.1;AJY68154.1;ADI84744.1;AAR35282.1;CBC03378.1;CBB99894.1;CAW37506.1;CAW33860.1	2-isopropylmalate;unnamed	0.478549	0.0807803	0.970495	0	0	8740000	10300000	13400000	15700000	14400000	15100000
AAR35283.2;ADI84745.1;AJY68155.1;BBA70404.1;BEH10093.1;QVW33861.1;UAC02648.1;UTG91369.1;WP_010942552.1;WP_119332801.1	BEH10093.1;UTG91369.1;UAC02648.1;QVW33861.1;WP_119332801.1;WP_010942552.1;BBA70404.1;AJY68155.1;AAR35283.2;ADI84745.1	CDP-diacylglycerol--serine;hypothetical	-0.0280336	0.827559	0.991407	0	0	721238	680658	655700	587401	764724	665875
AAR35286.1;ADI84748.1;AJY68158.1;BBA70407.1;BEH10090.1;QVW33864.1;UAC02651.1;UTG91372.1	BEH10090.1;UTG91372.1;UAC02651.1;QVW33864.1;BBA70407.1;AJY68158.1;ADI84748.1;AAR35286.1	Putative;acetolactate	-0.12276	0.645902	0.972476	0	0	25100000	15600000	25500000	20300000	22500000	18000000
AAR35287.1;QVW33865.1;UAC02652.1;UTG91373.1;WP_010942556.1	WP_119332804.1;WP_010942556.1;BEH10089.1;UTG91373.1;UAC02652.1;QVW33865.1;BBA70408.1;AJY68159.1;AAR35287.1	acetolactate;biosynthetic-type	0.066124	0.78436	0.988936	0	0	13700000	13100000	10300000	14700000	14500000	9640000
AAR35289.1;ADI84751.1;AJY68161.1;QVW33867.1;UAC02654.1;UTG91375.1;WP_010942558.1	WP_119332806.1;WP_010942558.1;BEH10087.1;UTG91375.1;UAC02654.1;QVW33867.1;BBA70410.1;AJY68161.1;ADI84751.1;AAR35289.1	nucleoid;peptidase;tRNA	0.0152131	0.948526	1	0	0	1520000	1970000	2170000	1480000	2200000	2040000
AAR35290.1;ADI84752.1;AJY68162.1;BBA70411.1;QVW33868.1;UAC02655.1;UTG91376.1;WP_010942559.1;WP_119332807.1	WP_324309984.1;BEH10086.1;WP_119332807.1;WP_010942559.1;UTG91376.1;UAC02655.1;QVW33868.1;BBA70411.1;AJY68162.1;ADI84752.1;AAR35290.1	Metalloprotease;RIP;membrane-associated;zinc	-0.0490426	0.78433	0.988936	0	0	2550000	2790000	2140000	2150000	2830000	2250000
AAR35300.2;ADI84762.1;AJY68171.1;BBA70421.1;QVW33877.1;UAC02664.1;UTG91385.1;WP_010942569.1;WP_119332815.1;WP_262421243.1	WP_119332815.1;WP_010942569.1;WP_262421243.1;UTG91385.1;UAC02664.1;QVW33877.1;BBA70421.1;AJY68171.1;AAR35300.2;ADI84762.1	IPT/TIG;hypothetical;transcription	0.331601	0.330735	0.970495	0	0	1360000	713783	842597	1280000	1280000	1110000
AAR35301.1;ADI84763.1;AJY68172.1;QVW33878.1;UAC02665.1;UTG91386.1;WP_010942570.1	WP_324309972.1;WP_119332816.1;WP_286352408.1;WP_010942570.1;BEH10075.1;UTG91386.1;UAC02665.1;QVW33878.1;BBA70422.1;AJY68172.1;ADI84763.1;AAR35301.1	cytidylate;transporter	0.0661599	0.679221	0.973029	0	0	6490000	6530000	8290000	7660000	8080000	6570000
AAR35304.2;ADI84766.2;AJY68175.1;QVW33881.1;UAC02668.1;UTG91389.1;WP_235044858.1	WP_235044858.1;UTG91389.1;UAC02668.1;QVW33881.1;AJY68175.1;AAR35304.2;ADI84766.2	ATP-binding;histidine;response;sensor	1.48649	0.0124311	0.875241	0	0	260994	689175	323895	1080000	1080000	1410000
AAR35306.1;ADI84768.1;AJY68177.1;QVW33883.1;UAC02670.1;UTG91391.1;WP_010942575.1	WP_324309965.1;WP_286352403.1;WP_119332820.1;WP_010942575.1;BEH10070.1;UTG91391.1;UAC02670.1;QVW33883.1;BBA70427.1;AJY68177.1;ADI84768.1;AAR35306.1	GTP-binding	0.339149	0.300581	0.970495	0	0	1790000	1030000	2010000	1740000	2370000	2000000
AAR35307.2;ADI84769.2;AJY68178.1;BBA70428.1;BEH10069.1;QVW33884.1;UAC02671.1;UTG91392.1;WP_010942576.1;WP_119332821.1;WP_286352402.1	WP_286352402.1;BEH10069.1;UTG91392.1;UAC02671.1;QVW33884.1;WP_119332821.1;BBA70428.1;AJY68178.1;AAR35307.2;ADI84769.2;WP_010942576.1	hypothetical	0.349282	0.329605	0.970495	0	0	362796	324577	339360	303664	446777	557541
AAR35308.1;ADI84770.1;UAC02672.1;WP_010942577.1	WP_324309960.1;WP_286352401.1;WP_045667155.1;BEH10068.1;WP_214302373.1;WP_119332822.1;WP_010942577.1;UTG91393.1;UAC02672.1;QVW33885.1;BBA70429.1;AJY68179.1;ADI84770.1;AAR35308.1	SPOR	0.316603	0.0524166	0.970495	0	0	4490000	4560000	4520000	5490000	6150000	5260000
AAR35311.2;ADI84773.1;BEH10065.1;QVW33888.1;UAC02675.1;WP_010942580.1	BEH10065.1;WP_254277960.1;UTG91396.1;WP_119332825.1;WP_010942580.1;UAC02675.1;QVW33888.1;BBA70432.1;AJY68182.1;AAR35311.2;ADI84773.1	biotin;biotin--[acetyl-CoA-carboxylase]	-1.02067	0.00973933	0.875241	0	0	3240000	2840000	3760000	1720000	1960000	1170000
AAR35312.1;ADI84774.1;AJY68183.1;UAC02676.1;UTG91397.1;WP_045667157.1	WP_286352399.1;WP_214302376.1;WP_119332826.1;WP_045667157.1;BEH10064.1;UTG91397.1;UAC02676.1;QVW33889.1;BBA70433.1;AJY68183.1;ADI84774.1;AAR35312.1	carboxylating;nicotinate-nucleotide;quinolinate	-0.255839	0.254664	0.970495	0	0	1960000	1930000	2510000	1520000	1710000	2130000
AAR35313.1;ADI84775.1;AJY68184.1;BBA70434.1;BEH10063.1;QVW33890.1;UAC02677.1;UTG91398.1;WP_010942582.1;WP_045667158.1;WP_119332827.1;WP_214302377.1;WP_286352398.1	WP_286352398.1;WP_119332827.1;WP_045667158.1;WP_010942582.1;BEH10063.1;WP_214302377.1;UTG91398.1;UAC02677.1;QVW33890.1;BBA70434.1;AJY68184.1;ADI84775.1;AAR35313.1	diguanylate;hypothetical;nucleotide;sensor	0.326907	0.403202	0.970495	0	0	1470000	1120000	1460000	2310000	1550000	1220000
AAR35314.1;ADI84776.1;AJY68185.1;BEH10062.1;QVW33891.1;UAC02678.1;UTG91399.1;WP_045667159.1	BEH10062.1;UTG91399.1;UAC02678.1;QVW33891.1;WP_119332828.1;BBA70435.1;WP_045667159.1;AJY68185.1;ADI84776.1;AAR35314.1	hypothetical;lipoprotein;lipoprotein,;tetratricopeptide	0.0890608	0.835885	0.991407	0	0	732966	800198	315416	597745	825693	542855
AAR35315.1;ADI84777.1;AJY68186.1;BBA70436.1;BEH10061.1;QVW33892.1;UAC02679.1;UTG91400.1;WP_010942584.1;WP_045667160.1;WP_119332829.1;WP_214302378.1;WP_286352397.1	WP_045667160.1;WP_286352397.1;WP_119332829.1;WP_010942584.1;WP_214302378.1;BEH10061.1;UTG91400.1;UAC02679.1;QVW33892.1;BBA70436.1;AJY68186.1;ADI84777.1;AAR35315.1	Cyclic;GAF;HD;histidine;sensor	0.256814	0.527565	0.970495	0	0	364382	519282	800979	791902	727814	493158
AAR35316.1;ADI84778.1;UAC02680.1;UTG91401.1;WP_010942585.1	BEH10060.1;UTG91401.1;UAC02680.1;QVW33893.1;WP_119332830.1;WP_010942585.1;BBA70437.1;AJY68187.1;ADI84778.1;AAR35316.1	PEP-CTERM-box;sigma-54-dependent	0.0434818	0.88607	0.995781	0	0	3220000	2120000	1850000	2870000	2140000	2400000
AAR35317.2;ADI84779.1;UAC02681.1;UTG91402.1;WP_010942586.1;WP_014551706.1;WP_254277961.1	WP_254277961.1;WP_014551706.1;WP_010942586.1;UTG91402.1;UAC02681.1;AAR35317.2;ADI84779.1	PEP-CTERM;XrtA/PEP-CTERM;sensor	0.437119	0.199601	0.970495	0	0	384630	301557	568241	561746	552094	584527
AAR35318.1;ADI84780.1;AJY68189.1;UAC02682.1;UTG91403.1;WP_010942587.1	WP_119332832.1;WP_286352395.1;WP_214302381.1;WP_010942587.1;BEH10058.1;UTG91403.1;UAC02682.1;QVW33895.1;BBA70439.1;AJY68189.1;ADI84780.1;AAR35318.1	GDP-mannose;UDP-N-acetyl-D-galactosamine;nucleotide	-0.0486652	0.749984	0.982577	0	0	2440000	3200000	2500000	2530000	2640000	2700000
AAR35324.1;BBA70443.1;UAC02687.1;WP_010942592.1;WP_119332836.1	WP_119332836.1;WP_010942592.1;UAC02687.1;BBA70443.1;AAR35324.1	IPT/TIG;hypothetical	0.820178	0.0112561	0.875241	0	0	291134	190379	217174	366293	453188	414137
AAR35326.1;ADI84788.2;BBA70445.1;UAC02689.1;WP_010942594.1;WP_014551710.1;WP_119332838.1;WP_324309941.1	WP_286352389.1;WP_119332838.1;WP_014551710.1;WP_324309941.1;WP_010942594.1;BEH10051.1;UAC02689.1;BBA70445.1;ADI84788.2;AAR35326.1	AMP-binding;Phenylacetate-coenzyme;adenylyltransferase,;phenylacetate--CoA	0.0900058	0.817314	0.991407	0	0	457613	263875	642546	445683	540718	465442
AAR35328.1;ADI84790.1;UAC02691.1;WP_010942596.1	WP_010942596.1;UAC02691.1;ADI84790.1;AAR35328.1	glycosyltransferase;glycosyltransferase,	-1.12092	0.148681	0.970495	1	0	711565	825294	320616	183086	382569	288415
AAR35329.1;ADI84791.1;WP_010942597.1;WP_014551711.1	BEH10048.1;WP_262421244.1;WP_119332841.1;WP_010942597.1;WP_014551711.1;BBA70448.1;ADI84791.1;AAR35329.1	asparagine	-0.0521438	0.842036	0.991407	0	0	809815	629985	546455	716528	717908	481311
AAR35337.1;ADI84796.1;AJY68199.1;BBA70456.1;BEH10043.1;UAC02698.1;UTG91419.1;WP_010942605.1;WP_014551716.1;WP_119332848.1;WP_254277976.1;WP_286352381.1	WP_286352381.1;WP_119332848.1;WP_014551716.1;WP_254277976.1;WP_010942605.1;BEH10043.1;UTG91419.1;UAC02698.1;BBA70456.1;AJY68199.1;ADI84796.1;AAR35337.1	Hyaluronan;glycosyl;glycosyltransferase	0.0894507	0.837007	0.991407	0	0	1170000	726065	1420000	985171	873006	1670000
AAR35344.1;ADI84803.1;BBA70463.1;BEH10036.1;UAC02704.1;UTG91425.1;WP_010942612.1;WP_014551723.1;WP_119332854.1;WP_254277983.1	BEH10036.1;WP_254277983.1;UTG91425.1;UAC02704.1;WP_119332854.1;WP_014551723.1;WP_010942612.1;BBA70463.1;ADI84803.1;AAR35344.1	D-glycero-alpha-D-manno-heptose;nucleotidyltransferase;nucleotidyltransferase,	0.420506	0.240057	0.970495	0	0	1040000	494567	990474	989507	1120000	1270000
AAR35345.1;UAC02705.1;WP_010942613.1	WP_286352373.1;BEH10035.1;WP_254277984.1;UTG91426.1;UAC02705.1;WP_119332855.1;BBA70464.1;ADI84804.1;AAR35345.1;WP_014551724.1;WP_010942613.1	hypothetical	-0.388664	0.289451	0.970495	0	0	1020000	997183	603330	790543	735498	475603
AAR35346.1;UAC02706.1;WP_235044860.1	WP_238525059.1;WP_235044860.1;UAC02706.1;ADI84805.1;AAR35346.1	N-acetylneuraminate	0.118652	0.648485	0.97248	0	0	711191	636216	616333	917499	624599	589974
AAR35350.1;ADI84809.1;CBF90280.1;CBG01599.1;CBV03871.1;CBV15119.1;UAC02710.1;WP_010942618.1	WP_286352369.1;BEH10030.1;WP_254277989.1;UTG91431.1;UAC02710.1;WP_119332860.1;WP_010942618.1;BBA70469.1;ADI84809.1;AAR35350.1;CBV15119.1;CBV03871.1;CBG01599.1;CBF90280.1	LegC;aminotransferase,;unnamed	0.0485191	0.91544	0.999308	0	0	1160000	608282	1040000	586096	948237	1370000
AAR35351.1;ADI84810.1;UAC02711.1;WP_010942619.1	UAC02711.1;WP_010942619.1;ADI84810.1;AAR35351.1	NAD-dependent	-0.471923	0.311679	0.970495	0	0	4360000	2660000	2550000	1340000	2980000	2580000
AAR35358.2;BEH10022.1;UAC05827.1;WP_010942626.1;WP_324309896.1	WP_324309896.1;WP_254277992.1;WP_238525060.1;WP_232008885.1;WP_010942626.1;BEH10022.1;UTG91439.1;UAC05827.1;BBA70477.1;AJY68213.1;AAR35358.2;ADI84817.1	ATPase,;XrtA-associated;XrtA/PEP-CTERM	-0.702654	0.437963	0.970495	0	0	323590	110461	567502	192098	291098	132199
AAR35359.2;UAC02718.1;WP_010942627.1	WP_324309894.1;WP_286352360.1;BEH10021.1;WP_254277993.1;UTG91440.1;UAC02718.1;WP_119332868.1;WP_014551734.1;WP_010942627.1;BBA70478.1;AJY68214.1;AAR35359.2;ADI84818.1	XrtA-associated;protein	-0.160584	0.404218	0.970495	0	0	2540000	2010000	2570000	2340000	2300000	1730000
AAR35360.1;UAC02719.1;WP_010942628.1	WP_324309892.1;WP_286352359.1;WP_119332869.1;WP_014551735.1;WP_010942628.1;BEH10020.1;UTG91441.1;UAC02719.1;BBA70479.1;AJY68215.1;ADI84819.1;AAR35360.1	XrtA;chain-length;polysaccharide	-0.366931	0.466736	0.970495	0	0	885827	341162	811062	465137	533499	581731
AAR35361.1;ADI84820.1;AJY68216.1;BBA70480.1;UAC02720.1;UTG91442.1;WP_010942629.1;WP_014551736.1;WP_045667182.1;WP_119332870.1	WP_045667182.1;WP_119332870.1;WP_286352358.1;WP_010942629.1;WP_014551736.1;WP_324309890.1;WP_214302414.1;BEH10019.1;UTG91442.1;UAC02720.1;QVW33928.1;BBA70480.1;AJY68216.1;ADI84820.1;AAR35361.1	Polysialic;periplasmic;polysaccharide;sugar	-0.50245	0.271714	0.970495	0	0	1230000	664421	808593	414648	729555	763873
AAR35362.2;ADI84821.2;AJY68217.1;BBA70481.1;BEH10018.1;UAC02721.1;UTG91443.1;WP_010942630.1;WP_045667183.1;WP_119332871.1	WP_119332871.1;WP_045667183.1;WP_010942630.1;BEH10018.1;UTG91443.1;UAC02721.1;BBA70481.1;AJY68217.1;AAR35362.2;ADI84821.2	TIGR03013;UDP-N-acetylgalactosamine-undecaprenyl-phosphate;glycosyl;undecaprenyl-phosphate	-0.792026	0.0864779	0.970495	0	0	339867	497559	319465	253954	139515	274673
AAR35363.2;UAC02722.1;WP_010942631.1	WP_324309887.1;WP_286352356.1;WP_254277994.1;WP_119332872.1;WP_014551737.1;WP_010942631.1;BEH10017.1;UTG91444.1;UAC02722.1;BBA70482.1;AJY68218.1;AAR35363.2;ADI84822.1	PEP-CTERM;TPR;XrtA/PEP-CTERM	-0.451907	0.237801	0.970495	0	0	4060000	2280000	3700000	2330000	2600000	2410000
AAR35365.1;ADI84824.1;AJY68220.1;BBA70484.1;CBF90728.1;CBG02329.1;CBV04248.1;CBV15849.1;UAC02724.1;UTG91446.1;WP_010942633.1;WP_119332874.1	WP_214302418.1;WP_119332874.1;WP_010942633.1;UTG91446.1;UAC02724.1;QVW33932.1;BBA70484.1;AJY68220.1;ADI84824.1;AAR35365.1;CBV15849.1;CBV04248.1;CBG02329.1;CBF90728.1	Transcriptional;chemotaxis;sigma-54;sigma-54-dependent;unnamed	0.0629519	0.893507	0.995781	1	0	534493	399547	315546	221464	595862	487993
AAR35368.2;ADI84827.1;AJY68223.1;BBA70487.1;BEH10012.1;UAC05828.1;UTG91449.1;WP_010942636.1;WP_119332877.1;WP_286352351.1	WP_286352351.1;BEH10012.1;WP_119332877.1;WP_010942636.1;UTG91449.1;UAC05828.1;BBA70487.1;AJY68223.1;AAR35368.2;ADI84827.1	CRP-like;Crp/Fnr;transcriptional	-0.439666	0.53072	0.970495	0	0	239483	590388	214536	261552	224415	284080
AAR35372.1;ADI84830.1;AJY68226.1;BBA70491.1;BEH10009.1;QVW33938.1;UAC02729.1;UTG91452.1;WP_010942639.1;WP_119332880.1;pdb|3OV0|A	pdb|3OV0|A;pdb|3OUQ|A;BEH10009.1;UTG91452.1;UAC02729.1;QVW33938.1;WP_119332880.1;WP_010942639.1;BBA70491.1;AJY68226.1;ADI84830.1;AAR35372.1	C-type;Chain;cytochrome	0.31571	0.538266	0.970495	0	0	499372	521645	532450	679924	923100	330458
AAR35373.1;ADI84831.1;AJY68227.1;QVW33939.1;UAC02730.1;UTG91453.1;WP_010942640.1	WP_010942640.1;WP_119332881.1;UTG91453.1;UAC02730.1;QVW33939.1;BBA70492.1;AJY68227.1;ADI84831.1;AAR35373.1	DUF512;FeS-binding;iron-sulfur	0.0646201	0.803208	0.990742	0	0	620148	390025	564434	661172	470568	514999
AAR35374.1;ADI84832.1;AJY68228.1;QVW33940.1;UAC02731.1;UTG91454.1;WP_010942641.1;WP_238525062.1	WP_010942641.1;WP_286352347.1;WP_324309873.1;BEH10007.1;WP_238525062.1;WP_232008887.1;UTG91454.1;UAC02731.1;QVW33940.1;BBA70493.1;AJY68228.1;ADI84832.1;AAR35374.1	AI-2E;membrane;transporter	-0.0559854	0.853342	0.991528	1	0	245972	299169	387280	359816	214419	322695
AAR35375.1;ADI84833.1;AJY68229.1;BBA70494.1;BEH10006.1;QVW33941.1;UAC02732.1;UTG91455.1	BEH10006.1;UTG91455.1;UAC02732.1;QVW33941.1;BBA70494.1;AJY68229.1;ADI84833.1;AAR35375.1	RNA;RNA-binding	-0.17086	0.355761	0.970495	0	0	5440000	6510000	5420000	5790000	5470000	4170000
AAR35378.1;AJY68232.1;UAC02735.1;WP_010942645.1	WP_286352344.1;WP_014551738.1;WP_254277998.1;WP_010942645.1;WP_324309867.1;BEH10003.1;UTG91458.1;UAC02735.1;QVW33944.1;AJY68232.1;ADI84836.1;AAR35378.1	FAD-dependent;NAD(P)-binding;NAD(P)/FAD-dependent;pyridine	0.133045	0.447964	0.970495	0	0	1390000	1310000	1130000	1380000	1200000	1620000
AAR35380.1;ADI84838.1;AJY68234.1;UAC05829.1;UTG91460.1;WP_010942647.1	WP_324309864.1;BEH10001.1;WP_214302425.1;WP_119332886.1;WP_010942647.1;UTG91460.1;UAC05829.1;QVW33946.1;BBA70499.1;AJY68234.1;ADI84838.1;AAR35380.1	3-octaprenyl-4-hydroxybenzoate;UbiD	0.152003	0.497916	0.970495	0	0	1650000	1480000	2270000	2000000	1870000	2130000
AAR35381.1;ADI84839.1;AJY68236.1;BBA70500.1;BEH10000.1;QVW33947.1;UAC02737.1;UTG91461.1;WP_010942648.1;WP_119332887.1	WP_119332887.1;WP_010942648.1;BEH10000.1;UTG91461.1;UAC02737.1;QVW33947.1;BBA70500.1;AJY68236.1;ADI84839.1;AAR35381.1	ABC;MULTISPECIES:;branched-chain;hypothetical	-0.369871	0.475484	0.970495	0	0	7150000	3530000	3470000	4150000	3630000	3170000
AAR35385.1;ADI84843.1;AJY68240.1;BBA70504.1;BEH09996.1;QVW33951.1;UAC02741.1;UTG91465.1	BEH09996.1;UTG91465.1;UAC02741.1;QVW33951.1;BBA70504.1;AJY68240.1;ADI84843.1;AAR35385.1	ABC;High-affinity;branched-chain;leucine/isoleucine/valine	-0.660076	0.222523	0.970495	0	0	1670000	957838	888550	827459	779422	618448
AAR35387.1;ADI84845.1;AJY68242.1;UAC02743.1;UTG91467.1;WP_010942654.1	WP_214302428.1;WP_010942654.1;UTG91467.1;UAC02743.1;QVW33953.1;AJY68242.1;ADI84845.1;AAR35387.1	cysteine;nitrogen	0	1	1	0	0	10400000	11600000	10800000	11100000	10800000	10900000
AAR35388.1;ADI84846.1;AJY68243.1;BBA70507.1;BEH09993.1;QVW33954.1;UAC02744.1;UTG91468.1;WP_010942655.1;WP_119332893.1;WP_324309854.1	WP_324309854.1;WP_119332893.1;WP_010942655.1;BEH09993.1;UTG91468.1;UAC02744.1;QVW33954.1;BBA70507.1;AJY68243.1;ADI84846.1;AAR35388.1	Fe-S;Iron-sulfur;nitrogen	-0.0704466	0.85383	0.991528	0	0	5230000	4920000	2440000	4800000	3190000	4000000
AAR35389.1;ADI84847.1;AJY68244.1;QVW33955.1;UAC02745.1;UTG91469.1;WP_010942656.1	WP_324309852.1;BEH09992.1;UTG91469.1;UAC02745.1;QVW33955.1;WP_119332894.1;BBA70508.1;WP_010942656.1;AJY68244.1;ADI84847.1;AAR35389.1	phosphoglucomutase;phosphoglucomutase/phosphomannomutase	-0.032697	0.821438	0.991407	0	0	11800000	11800000	12100000	13000000	12300000	9600000
AAR35390.1;ADI84848.1;AJY68245.1;BBA70509.1;BEH09991.1;QVW33956.1;UAC02746.1;UTG91470.1;WP_010942657.1	BEH09991.1;UTG91470.1;UAC02746.1;QVW33956.1;WP_010942657.1;BBA70509.1;AJY68245.1;ADI84848.1;AAR35390.1	PxxKW;hypothetical	-0.730922	0.449466	0.970495	0	0	2420000	4570000	844853	2510000	1300000	910645
AAR35392.1;ADI84850.1;AJY68247.1;BBA70511.1;BEH09989.1;QVW33958.1;UAC02748.1;UTG91472.1;WP_010942659.1;WP_119332896.1;WP_214302429.1;WP_238525063.1;WP_286352334.1;WP_324309850.1	WP_214302429.1;WP_324309850.1;WP_238525063.1;WP_286352334.1;WP_119332896.1;WP_010942659.1;BEH09989.1;UTG91472.1;UAC02748.1;QVW33958.1;BBA70511.1;AJY68247.1;ADI84850.1;AAR35392.1	Cyclic;EAL;MULTISPECIES:;diguanylate;putative;sensor	-1.51659	0.0913245	0.970495	1	1	315430	415027	655307	124398	166089	193854
AAR35393.1;ADI84851.1;AJY68248.1;QVW33959.1;UAC02749.1;UTG91473.1;WP_010942660.1	WP_324309848.1;BEH09988.1;UTG91473.1;UAC02749.1;QVW33959.1;WP_119332897.1;WP_010942660.1;BBA70512.1;AJY68248.1;ADI84851.1;AAR35393.1	futalosine;menaquinone	-0.0353939	0.828719	0.991407	0	0	2820000	2510000	2510000	2300000	3040000	2310000
AAR35395.1;ADI84853.1;AJY68250.1;BBA70514.1;CBF60265.1;CBF61090.1;CBF62146.1;CBF64327.1;CBF68541.1;CBF95791.1;CBU85509.1;CBU86118.1;CBU87022.1;CBU89203.1;CBU93415.1;CBV09311.1;QVW33961.1;UAC02751.1;UTG91475.1;WP_010942662.1	WP_010942662.1;BEH09986.1;UTG91475.1;UAC02751.1;QVW33961.1;BBA70514.1;AJY68250.1;ADI84853.1;AAR35395.1;CBU93415.1;CBU89203.1;CBU86118.1;CBU85509.1;CBV09311.1;CBU87022.1;CBF95791.1;CBF68541.1;CBF62146.1;CBF61090.1;CBF60265.1;CBF64327.1	Biotin;acetyl-CoA;unnamed	0.0128698	0.918354	0.999308	0	0	5750000	5810000	5180000	5860000	6180000	4850000
AAR35396.1;ADI84854.1;AJY68251.1;BBA70515.1;BEH09985.1;QVW33962.1;UAC02752.1;UTG91476.1;WP_010942663.1;WP_119332899.1;WP_214302430.1	BEH09985.1;UTG91476.1;UAC02752.1;WP_214302430.1;QVW33962.1;WP_119332899.1;WP_010942663.1;BBA70515.1;AJY68251.1;ADI84854.1;AAR35396.1	Biotin;acetyl-CoA	0.282512	0.165626	0.970495	0	0	8760000	8730000	8260000	9520000	12200000	9600000
AAR35397.1;ADI84855.1;AJY68252.1;QVW33963.1;UAC02753.1;UTG91477.1;WP_010942664.1;WP_214302431.1;WP_254277999.1	WP_286352329.1;WP_254277999.1;WP_214302431.1;WP_119332900.1;WP_010942664.1;BEH09984.1;UTG91477.1;UAC02753.1;QVW33963.1;BBA70516.1;AJY68252.1;ADI84855.1;AAR35397.1	M24;Xaa-Pro;aminopeptidase;integrase;prolidase	0.0912681	0.742221	0.981738	0	0	9350000	10200000	12300000	9230000	10000000	14700000
AAR35399.1;ADI84857.1;AJY68254.1;BBA70518.1;BEH09982.1;QVW33965.1;UAC02755.1;UTG91479.1;WP_010942666.1;WP_119332902.1;WP_286352327.1	WP_286352327.1;WP_119332902.1;WP_010942666.1;BEH09982.1;UTG91479.1;UAC02755.1;QVW33965.1;BBA70518.1;AJY68254.1;ADI84857.1;AAR35399.1	GTPase;GTPase-activating;hypothetical;roadblock/LC7	0.309048	0.164061	0.970495	0	0	708668	924866	888877	1200000	1050000	874989
AAR35400.2;ADI84858.2;QVW33966.1;UAC02756.1;UTG91480.1;WP_235044866.1	WP_232008888.1;WP_286352326.1;WP_235044866.1;WP_324309842.1;BEH09981.1;UTG91480.1;UAC02756.1;QVW33966.1;BBA70519.1;AJY68255.1;AAR35400.2;ADI84858.2	TPR;tetratricopeptide	0.0910741	0.76673	0.985921	0	0	1040000	1310000	1640000	1530000	1710000	1010000
AAR35404.1;ADI84862.1;AJY68259.1;QVW33970.1;UAC02760.1;WP_010942671.1;WP_045667187.1	BEH09977.1;WP_254278000.1;UTG91484.1;UAC02760.1;QVW33970.1;WP_119332907.1;BBA70523.1;WP_045667187.1;WP_010942671.1;AJY68259.1;ADI84862.1;AAR35404.1	pilus;type	0.477886	0.0074223	0.875241	0	0	9160000	11100000	9610000	13500000	14700000	13400000
AAR35405.1;ADI84863.2;AJY68260.1;BBA70524.1;BEH09976.1;QVW33971.1;UAC02761.1;UTG91485.1;WP_010942672.1;WP_119332908.1;WP_254278001.1;WP_286352321.1	WP_010942672.1;WP_254278001.1;WP_286352321.1;WP_119332908.1;BEH09976.1;UTG91485.1;UAC02761.1;QVW33971.1;BBA70524.1;AJY68260.1;ADI84863.2;AAR35405.1	MULTISPECIES:;hypothetical;pilus;type	0.626019	0.0987508	0.970495	0	0	3450000	3660000	5130000	5170000	7910000	5810000
AAR35406.1;ADI84864.1;AJY68261.1;BBA70525.1;BEH09975.1;QVW33972.1;UAC02762.1;UTG91486.1;WP_119332909.1;WP_324309834.1	WP_324309834.1;BEH09975.1;UTG91486.1;UAC02762.1;QVW33972.1;WP_119332909.1;BBA70525.1;AJY68261.1;ADI84864.1;AAR35406.1	hypothetical;pilus;type	0.183783	0.776378	0.988715	0	0	777245	1190000	2610000	2140000	959101	2100000
AAR35407.1;ADI84865.1;AJY68262.1;BBA70526.1;BEH09974.1;QVW33973.1;UAC02763.1;UTG91487.1;WP_010942674.1;WP_286352320.1;WP_324309832.1	WP_010942674.1;WP_286352320.1;WP_324309832.1;BEH09974.1;UTG91487.1;UAC02763.1;QVW33973.1;BBA70526.1;AJY68262.1;ADI84865.1;AAR35407.1	MULTISPECIES:;PilN;fimbrial;hypothetical;type	0.436099	0.0754047	0.970495	0	0	2400000	3390000	2880000	3420000	4500000	3810000
AAR35408.1;ADI84866.1;AJY68263.1;BBA70527.1;BEH09973.1;QVW33974.1;UAC02764.1;UTG91488.1;WP_010942675.1;WP_119332910.1	WP_119332910.1;WP_010942675.1;BEH09973.1;UTG91488.1;UAC02764.1;QVW33974.1;BBA70527.1;AJY68263.1;ADI84866.1;AAR35408.1	hypothetical;pilus;type	0.583157	0.00620418	0.84244	0	0	3220000	3450000	3990000	5500000	4840000	5630000
AAR35409.2;ADI84867.1;AJY68264.1;BBA70528.1;BEH09972.1;QVW33975.1;UAC02765.1;UTG91489.1;WP_010942676.1	WP_010942676.1;BEH09972.1;UTG91489.1;UAC02765.1;QVW33975.1;BBA70528.1;AJY68264.1;AAR35409.2;ADI84867.1	MULTISPECIES:;XRE;helix-turn-helix;hypothetical	0.32596	0.135767	0.970495	0	0	405201	495226	388797	585053	585000	445987
AAR35410.2;ADI84868.2;AJY68265.1;BBA70529.1;QVW33976.1;UAC05830.1;UTG91490.1;WP_010942677.1;WP_235044867.1	WP_324309824.1;WP_235044867.1;BEH09971.1;UTG91490.1;UAC05830.1;QVW33976.1;BBA70529.1;AJY68265.1;AAR35410.2;ADI84868.2;WP_010942677.1	hypothetical;pilus;type	0.495769	0.0443725	0.952267	0	0	1620000	1120000	1430000	1700000	2120000	2060000
AAR35411.2;ADI84869.1;UAC02766.1;UTG91491.1;WP_010942678.1	WP_010942678.1;BEH09970.1;WP_045667189.1;UTG91491.1;UAC02766.1;QVW33977.1;WP_119332911.1;BBA70530.1;AJY68266.1;AAR35411.2;ADI84869.1	prepilin-type;type	-0.00477978	0.982676	1	0	0	2760000	3670000	2640000	3560000	2600000	2880000
AAR35414.1;ADI84872.2;UAC02769.1;WP_010942681.1	WP_324309819.1;WP_254278003.1;WP_214302436.1;WP_010942681.1;BEH09967.1;UTG91494.1;WP_232008890.1;UAC02769.1;QVW33980.1;BBA70534.1;AJY68269.1;ADI84872.2;AAR35414.1	pilus;type	0.205872	0.472644	0.970495	0	0	1770000	2300000	2580000	3190000	2500000	1980000
AAR35422.1;ADI84880.1;AJY68275.1;BBA70542.1;QVW33987.1;UAC02776.1;UTG91501.1;WP_010942689.1;WP_119332920.1	WP_010942689.1;WP_119332920.1;WP_286352307.1;WP_324309805.1;BEH09959.1;UTG91501.1;UAC02776.1;QVW33987.1;BBA70542.1;AJY68275.1;ADI84880.1;AAR35422.1	DNA-binding;chemotaxis;response	0.276734	0.652746	0.97248	0	0	2890000	5320000	2620000	6380000	4790000	1950000
AAR35423.1;ADI84881.2;AJY68276.1;BBA70543.1;BEH09958.1;CBF92926.1;CBG05454.1;CBV06446.1;CBV18976.1;QVW33988.1;UAC02777.1;UTG91502.1;WP_010942690.1;WP_119332921.1;WP_286352306.1;WP_324309803.1	WP_286352306.1;WP_119332921.1;WP_010942690.1;WP_324309803.1;BEH09958.1;UTG91502.1;UAC02777.1;QVW33988.1;BBA70543.1;AJY68276.1;ADI84881.2;AAR35423.1;CBV06446.1;CBV18976.1;CBG05454.1;CBF92926.1	Esterase;MULTISPECIES:;beta-lactamase;metal-dependent;serine;unnamed	0.504122	0.0800072	0.970495	1	1	386288	413807	598614	641466	604091	738176
AAR35424.2;ADI84882.1;AJY71823.1;QVW33989.1;UAC02778.1;UTG91503.1;WP_010942691.1;WP_235044869.1	WP_119334082.1;BEH09957.1;WP_235044869.1;UTG91503.1;UAC02778.1;QVW33989.1;WP_010942691.1;BBA70544.1;AJY71823.1;AAR35424.2;ADI84882.1	DUF2914;hypothetical;lipoprotein;protein	0.934403	0.0801291	0.970495	0	0	228428	183380	369586	591723	563611	337988
AAR35427.1;ADI84885.1;AJY68279.1;UAC02781.1;WP_010942694.1	BEH09954.1;UTG91506.1;WP_214302449.1;UAC02781.1;QVW33992.1;WP_119332924.1;WP_010942694.1;BBA70547.1;AJY68279.1;ADI84885.1;AAR35427.1	phenylacetate--CoA;phenylacetate--coenzyme	-0.24687	0.142612	0.970495	0	0	6390000	6840000	8070000	6480000	5780000	5690000
AAR35429.2;ADI84887.1;AJY68281.1;QVW33994.1;UAC02783.1;UTG91508.1;WP_010942696.1	WP_324309794.1;WP_286352301.1;WP_119332926.1;WP_010942696.1;BEH09952.1;UTG91508.1;UAC02783.1;QVW33994.1;BBA70549.1;AJY68281.1;ADI84887.1;AAR35429.2	4Fe-4S;indolepyruvate;indolepyruvate:ferredoxin;thiamine	-0.285426	0.0529781	0.970495	0	0	5640000	6550000	6640000	5150000	5580000	4720000
AAR35431.1;ADI84888.1;AJY68282.1;QVW33995.1;UAC02784.1;UTG91509.1;WP_010942697.1	WP_324309792.1;BEH09951.1;UTG91509.1;UAC02784.1;QVW33995.1;WP_119332927.1;WP_010942697.1;BBA70550.1;AJY68282.1;ADI84888.1;AAR35431.1	C4-dicarboxylate;TRAP	0.088438	0.542305	0.970495	0	0	10300000	12000000	9020000	10900000	11900000	10500000
AAR35435.2;ADI84892.1;AJY68285.1;BBA70553.1;QVW33998.1;UAC02787.1;UTG91512.1;WP_010942700.1;WP_119332930.1	WP_119332930.1;WP_010942700.1;WP_324309786.1;BEH09948.1;UTG91512.1;UAC02787.1;QVW33998.1;BBA70553.1;AJY68285.1;ADI84892.1;AAR35435.2	chemotaxis;hypothetical;protein	-0.31791	0.587517	0.970495	0	0	2090000	5190000	2580000	2080000	2270000	3560000
AAR35436.1;ADI84893.1;AJY68286.1;QVW33999.1;UAC02788.1;UTG91513.1;WP_010942701.1;WP_254278005.1	WP_254278005.1;WP_010942701.1;UTG91513.1;UAC02788.1;QVW33999.1;AJY68286.1;ADI84893.1;AAR35436.1	TldD/PmbA;peptidase;zinc	0.285616	0.311079	0.970495	0	0	1090000	980136	1060000	1540000	1320000	955418
AAR35437.1;ADI84894.1;AJY68287.1;BBA70555.1;BEH09946.1;QVW34000.1;UAC02789.1;UTG91514.1;WP_010942702.1;WP_324309782.1	WP_324309782.1;BEH09946.1;UTG91514.1;UAC02789.1;QVW34000.1;BBA70555.1;WP_010942702.1;AJY68287.1;ADI84894.1;AAR35437.1	Amino-acid;N-acetylglutamate;N-acetyltransferase;acetyltransferase	-0.437108	0.197391	0.970495	0	0	1340000	2140000	1570000	1030000	1320000	1380000
AAR35439.1;ADI84896.1;AJY71824.1;BBA70557.1;BEH09944.1;QVW34002.1;UAC02791.1;UTG91516.1;WP_010942704.1;WP_286352293.1	WP_010942704.1;WP_286352293.1;BEH09944.1;UTG91516.1;UAC02791.1;QVW34002.1;BBA70557.1;AJY71824.1;ADI84896.1;AAR35439.1	HD;HDOD;MULTISPECIES:;hypothetical;metal-dependent	0.158698	0.584092	0.970495	0	0	1290000	1920000	1090000	1780000	1460000	1560000
AAR35440.1;ADI84898.1;AJY68290.1;QVW34004.1;UAC02793.1;WP_010942706.1	WP_324309778.1;WP_254278007.1;WP_119332933.1;WP_010942706.1;BEH09942.1;UTG91518.1;UAC02793.1;QVW34004.1;BBA70559.1;AJY68290.1;ADI84898.1;AAR35440.1	DNA	0.00569696	0.985978	1	0	0	892620	1790000	1710000	1330000	1500000	1580000
AAR35442.2;ADI84900.1;AJY68292.1;QVW34006.1;UAC02795.1;UTG91520.1;WP_010942708.1	WP_324309775.1;WP_119332934.1;WP_010942708.1;UTG91520.1;UAC02795.1;QVW34006.1;BBA70561.1;AJY68292.1;AAR35442.2;ADI84900.1	glycogen;glycogen/starch/alpha-glucan;maltodextrin	-0.0518389	0.81469	0.991407	0	0	1590000	1910000	2450000	1960000	2060000	1720000
AAR35443.1;ADI84901.2;AJY71825.1;BBA70562.1;QVW36955.1;UAC05832.1;UTG94465.1;WP_010942709.1;WP_119334083.1	WP_010942709.1;WP_119334083.1;UTG94465.1;UAC05832.1;QVW36955.1;BBA70562.1;AJY71825.1;ADI84901.2;AAR35443.1	ATPase;Replication-associated;replication-associated;stalled	0.0785999	0.930399	1	0	0	595435	576312	922419	380428	1510000	320996
AAR35444.1;ADI84902.1;AJY68293.1;BEH09938.1;QVW34007.1;UAC02796.1;UTG91521.1;WP_010942710.1	WP_119332935.1;WP_010942710.1;BEH09938.1;UTG91521.1;UAC02796.1;QVW34007.1;BBA70563.1;AJY68293.1;ADI84902.1;AAR35444.1	6-phosphofructokinase;6-phosphofructokinase,	-0.0543816	0.881688	0.995781	0	0	1590000	3330000	3460000	2940000	2710000	2420000
AAR35445.2;ADI84903.2;AJY71826.1;BBA70564.1;BEH09937.1;QVW34008.1;UAC02797.1;UTG91522.1;WP_193360256.1;WP_197714192.1;WP_286352287.1;WP_324309773.1	WP_286352287.1;WP_197714192.1;WP_193360256.1;WP_324309773.1;BEH09937.1;UTG91522.1;UAC02797.1;QVW34008.1;BBA70564.1;AJY71826.1;AAR35445.2;ADI84903.2	HAD;HAD-IA;MULTISPECIES:;Phosphoglycolate	0.394837	0.219104	0.970495	0	0	966387	1020000	1170000	1410000	1700000	1040000
AAR35448.2;ADI84906.2;AJY68296.1;BBA70567.1;QVW34011.1;UAC02800.1;UTG91525.1;WP_010942714.1;WP_119332937.1;WP_254278008.1	WP_119332937.1;WP_254278008.1;WP_010942714.1;UTG91525.1;UAC02800.1;QVW34011.1;BBA70567.1;AJY68296.1;AAR35448.2;ADI84906.2	1-acyl-sn-glycerol-3-phosphate;[acyl-]glycerolphosphate;glycerol;hypothetical;lysophospholipid	-0.850773	0.162566	0.970495	0	0	1060000	1390000	627939	770148	445744	490787
AAR35449.1;ADI84907.2;QVW34012.1;WP_010942715.1;WP_214302451.1;WP_262421246.1	WP_262421246.1;WP_254278009.1;WP_214302451.1;WP_010942715.1;WP_324309765.1;WP_286352283.1;BEH09933.1;WP_119332938.1;QVW34012.1;BBA70568.1;ADI84907.2;AAR35449.1	dystroglycan-type;putative	-1.14239	0.0381209	0.948398	0	0	687989	453084	479829	245631	175977	312672
AAR35452.1;ADI84910.1;AJY71827.1;BEH09930.1;QVW34015.1;UAC02803.1;UTG91528.1;WP_010942718.1;WP_254278012.1;WP_286352281.1;pdb|8D9M|A	WP_286352281.1;WP_254278012.1;WP_010942718.1;BEH09930.1;pdb|8D9M|A;UTG91528.1;UAC02803.1;QVW34015.1;AJY71827.1;ADI84910.1;AAR35452.1	Chain;IPT/TIG;MULTISPECIES:;cytochrome	-1.5806	0.248528	0.970495	0	0	6830000	1920000	2460000	976663	961321	1810000
AAR35454.1;ADI84912.1;AJY68301.1;BBA70573.1;QVW34017.1;UAC02805.1;UTG91530.1;WP_010942720.1;WP_014551741.1;WP_119332943.1	WP_119332943.1;WP_014551741.1;WP_010942720.1;UTG91530.1;UAC02805.1;QVW34017.1;BBA70573.1;AJY68301.1;ADI84912.1;AAR35454.1	Rod;cell;rod	0.790345	0.241266	0.970495	1	1	509671	431736	521711	479788	820657	1230000
AAR35455.1;ADI84913.1;AJY68302.1;BBA70574.1;QVW34018.1;UAC02806.1;UTG91531.1;WP_010942721.1;WP_119332944.1;WP_254278013.1	WP_324311487.1;WP_254278013.1;WP_119332944.1;WP_010942721.1;BEH09927.1;UTG91531.1;UAC02806.1;QVW34018.1;BBA70574.1;AJY68302.1;ADI84913.1;AAR35455.1	Penicillin-binding;penicillin-binding;peptidoglycan	-1.04291	0.176943	0.970495	0	0	662743	1170000	505607	295554	476883	362474
AAR35457.1;ADI84915.1;AJY68304.1;UAC02808.1;UTG91533.1;WP_010942723.1	UTG91533.1;UAC02808.1;WP_119332946.1;WP_010942723.1;BBA70576.1;AJY68304.1;ADI84915.1;AAR35457.1	cell;rod	0.93166	0.121429	0.970495	0	0	459868	589630	156677	516072	807623	977047
AAR35458.1;ADI84916.1;AJY68305.1;UAC02809.1;UTG91534.1;WP_010942724.1	WP_010942724.1;UTG91534.1;UAC02809.1;AJY68305.1;ADI84916.1;AAR35458.1	dTDP-4-dehydrorhamnose;nucleoside	-0.29972	0.484901	0.970495	0	0	6280000	4300000	3280000	5120000	2860000	3280000
AAR35459.1;ADI84917.1;AJY68306.1;BBA70578.1;UAC02810.1;UTG91535.1;WP_010942725.1;WP_119332948.1	WP_119332948.1;WP_010942725.1;BEH09923.1;UTG91535.1;UAC02810.1;QVW34022.1;BBA70578.1;AJY68306.1;ADI84917.1;AAR35459.1	Glucose-1-phosphate;glucose-1-phosphate	-0.11214	0.629924	0.970495	0	0	7050000	6240000	6500000	7640000	6010000	4660000
AAR35462.1;UAC02813.1;UTG91538.1;WP_010942728.1	BEH09920.1;UTG91538.1;UAC02813.1;QVW34025.1;WP_119332951.1;BBA70581.1;WP_014551744.1;AJY68309.1;ADI84920.1;AAR35462.1;WP_010942728.1	hypothetical	0.029068	0.937873	1	0	0	2090000	2460000	2820000	3310000	2740000	1470000
AAR35464.1;UAC05833.1;UTG91540.1;WP_010942730.1;WP_235044870.1	WP_235044870.1;WP_010942730.1;WP_324311482.1;WP_286352274.1;BEH09918.1;UTG91540.1;UAC05833.1;AAR35464.1	glycosyltransferase	-0.461156	0.229685	0.970495	0	0	943814	779702	1340000	670288	669996	885066
AAR35465.1;ADI84923.1;AJY68312.1;BBA70584.1;BEH09917.1;QVW34028.1;UAC02815.1;UTG91541.1;WP_010942731.1;WP_414973560.1;WP_416373129.1	WP_416373129.1;WP_414973560.1;WP_010942731.1;BEH09917.1;UTG91541.1;UAC02815.1;QVW34028.1;BBA70584.1;AJY68312.1;ADI84923.1;AAR35465.1	Rod;cell;rod	-0.0284284	0.874129	0.995781	0	0	13600000	11600000	15800000	14600000	14200000	11400000
AAR35466.1;ADI84924.1;AJY68313.1;QVW34029.1;UAC02816.1;UTG91542.1;WP_010942732.1	WP_324311479.1;WP_286352272.1;BEH09916.1;UTG91542.1;UAC02816.1;QVW34029.1;WP_010942732.1;WP_119332954.1;BBA70585.1;AJY68313.1;ADI84924.1;AAR35466.1	SurA;peptidylprolyl	-0.111683	0.135896	0.970495	0	0	15600000	14700000	14000000	14300000	13600000	13100000
AAR35468.1;ADI84926.1;AJY68315.1;QVW34031.1;UAC02818.1;UTG91544.1;WP_010942734.1	UTG91544.1;UAC02818.1;QVW34031.1;WP_010942734.1;AJY68315.1;ADI84926.1;AAR35468.1	YaeQ;hypothetical;protein	-0.951504	0.338388	0.970495	0	0	736433	127025	696717	458007	123461	225288
AAR35469.1;ADI84927.1;AJY68316.1;QVW34032.1;UAC02819.1;UTG91545.1;WP_010942735.1;WP_014551747.1	WP_014551747.1;WP_010942735.1;WP_286352269.1;BEH09913.1;WP_119332957.1;UTG91545.1;UAC02819.1;QVW34032.1;BBA70588.1;AJY68316.1;ADI84927.1;AAR35469.1	ABC;ABC-F;ATP-binding;glycosyl	0.0600217	0.800987	0.990681	0	0	1050000	768356	788711	892464	735355	1090000
AAR35477.1;AJY68326.1;QVW34040.1;UAC02827.1;UTG91553.1;WP_010942746.1;WP_045667197.1	WP_324311462.1;WP_119332969.1;WP_045667197.1;WP_014551749.1;WP_010942746.1;BEH09906.1;UTG91553.1;UAC02827.1;QVW34040.1;BBA70603.1;AJY68326.1;ADI84939.1;AAR35477.1	formate;glycerol;glycyl;trans-4-hydroxy-L-proline	0.0267793	0.756484	0.985743	0	0	1360000	1370000	1540000	1550000	1440000	1360000
AAR35480.1;ADN78361.1;AJY68328.1;QVW34042.1;UAC02829.1;UTG91555.1;WP_010942748.1;WP_014551751.1;WP_235044871.1;WP_324311459.1	WP_286352262.1;WP_235044871.1;WP_010942748.1;WP_014551751.1;WP_324311459.1;BEH09904.1;UTG91555.1;UAC02829.1;QVW34042.1;AJY68328.1;ADN78361.1;AAR35480.1	YybH;hypothetical;lipoprotein,;nuclear	-0.0065853	0.973494	1	0	0	1220000	969989	1170000	1140000	894687	1310000
AAR35481.1;UAC02830.1;WP_010942749.1	WP_010942749.1;UAC02830.1;AAR35481.1	hypothetical;protease	0.251342	0.146438	0.970495	0	0	827235	838806	838025	1090000	860624	1030000
AAR35482.1;UAC02831.1;WP_010942750.1	WP_010942750.1;UAC02831.1;AAR35482.1	PglZ	-0.242793	0.470375	0.970495	0	0	852534	865188	1260000	609496	1090000	816999
AAR35483.1;UAC02832.1;WP_010942751.1	WP_010942751.1;UAC02832.1;AAR35483.1	BREX-1;hypothetical	-0.126947	0.721032	0.975021	0	0	842895	815757	1420000	1070000	749328	1000000
AAR35484.1;UAC02834.1;WP_010942753.1	UAC02834.1;WP_010942753.1;AAR35484.1	BREX;hypothetical	0.103623	0.56045	0.970495	0	0	3970000	3330000	3040000	4290000	3490000	3330000
AAR35485.1	UAC02835.1;WP_164930436.1;AAR35485.1	hypothetical	-0.332674	0.251571	0.970495	0	0	1340000	1950000	2100000	1440000	1460000	1380000
AAR35486.2;UAC02836.1;WP_200858941.1	UAC02836.1;WP_200858941.1;AAR35486.2	DUF1819;hypothetical	0.0156352	0.888184	0.995781	0	0	689098	721285	684983	761903	743743	612552
AAR35495.1;UAC02844.1;WP_010942766.1	WP_010942766.1;UAC02844.1;AAR35495.1	integrase;integrative;tyrosine-type	-1.3385	0.0930282	0.970495	1	0	944249	1100000	487509	304730	216755	479654
AAR35496.1;AJY68330.1;UAC02845.1	UAC02845.1;AJY68330.1;AAR35496.1	integration	-0.632842	0.411108	0.970495	0	0	309063	99341	426105	162562	153097	222520
AAR35511.1;UAC02861.1;WP_010942780.1	WP_010942780.1;UAC02861.1;AAR35511.1	CusA/CzcA;efflux	0.326527	0.452079	0.970495	0	0	214179	287470	369276	265135	509133	317864
AAR35512.1;UAC02862.1;WP_010942781.1	WP_010942781.1;UAC02862.1;AAR35512.1	efflux	0.795102	0.531544	0.970495	0	0	660555	154031	441211	190568	1510000	478491
AAR35522.1;UAC02869.1;WP_010942790.1	UAC02869.1;WP_010942790.1;AAR35522.1	DUF302;protein	-0.391397	0.487358	0.970495	0	0	165339	471303	324984	292119	258072	182944
AAR35559.1;UAC02901.1;WP_164930448.1	WP_164930448.1;UAC02901.1;AAR35559.1	Fic	-0.122984	0.63325	0.970495	0	0	605089	456458	714391	441209	556958	632653
AAR35561.1;ADI84943.1;AJY71834.1;BEH09831.1;QVW34044.1;UAC02903.1;UTG91557.1	BEH09831.1;UTG91557.1;UAC02903.1;QVW34044.1;AJY71834.1;ADI84943.1;AAR35561.1	FlgM;flagellar	1.30749	0.0849876	0.970495	0	0	46778	66561	49794	88365	136406	178999
AAR35565.2;ADI84948.2;AJY71835.1;QVW34048.1;UAC02907.1;UTG91561.1;WP_010942829.1	WP_010942829.1;UTG91561.1;UAC02907.1;QVW34048.1;AJY71835.1;AAR35565.2;ADI84948.2	GHKL;PAS;histidine;sensor	0.0893039	0.485198	0.970495	0	0	741391	731006	831744	718733	829280	903263
AAR35566.1;ADI84949.1;AJY68428.1;QVW34049.1;UAC02908.1;UTG91562.1;WP_010942830.1	WP_286352193.1;WP_010942830.1;WP_324311254.1;WP_119333001.1;BEH09825.1;UTG91562.1;UAC02908.1;QVW34049.1;BBA70641.1;AJY68428.1;ADI84949.1;AAR35566.1	aldolase;class	-0.399928	0.423899	0.970495	0	0	859043	1360000	781071	1150000	648982	474793
AAR35567.1;ADI84950.1;AJY68429.1;UAC02909.1;WP_010942831.1;WP_014551754.1	WP_324311252.1;WP_286352192.1;BEH09824.1;UAC02909.1;WP_014551754.1;WP_010942831.1;AJY68429.1;ADI84950.1;AAR35567.1	aldehyde;aldehyde:ferredoxin	0.0220954	0.93703	1	0	0	634172	577629	977045	693311	750722	778594
AAR35568.1;ADI84951.1;AJY68430.1;BBA70643.1;BEH09823.1;QVW34051.1;UAC02910.1;UTG91564.1;WP_010942832.1;WP_119333003.1	BEH09823.1;UTG91564.1;UAC02910.1;QVW34051.1;WP_119333003.1;BBA70643.1;WP_010942832.1;AJY68430.1;ADI84951.1;AAR35568.1	HAD;Phosphoglycolate	-0.124301	0.746903	0.981924	0	0	1350000	2550000	1430000	1710000	1400000	1780000
AAR35569.1;ADI84952.1;AJY68431.1;BBA70644.1;QVW34052.1;UAC02911.1;UTG91565.1;WP_010942833.1;WP_119333004.1	WP_286352190.1;WP_119333004.1;BEH09822.1;UTG91565.1;UAC02911.1;QVW34052.1;WP_010942833.1;BBA70644.1;AJY68431.1;ADI84952.1;AAR35569.1	ferritin;ferritin-like;hypothetical	-0.30224	0.625791	0.970495	0	0	2280000	1210000	3970000	1500000	2410000	2140000
AAR35571.1;ADI84954.1;AJY68433.1;BBA70646.1;QVW34054.1;UAC02913.1;UTG91567.1;WP_010942835.1;WP_119333006.1	WP_324311248.1;WP_119333006.1;WP_010942835.1;BEH09820.1;UTG91567.1;UAC02913.1;QVW34054.1;BBA70646.1;AJY68433.1;ADI84954.1;AAR35571.1	IMP;Inosine-5'-monophosphate;inosine-5'-monophosphate;inosine-5-monophosphate	0.0191088	0.820382	0.991407	0	0	16100000	14900000	14000000	15600000	15900000	14100000
AAR35572.1;ADI84955.1;AJY68434.1;QVW34055.1;UAC02914.1;UTG91568.1;WP_010942836.1	UTG91568.1;UAC02914.1;QVW34055.1;WP_119333007.1;WP_010942836.1;BBA70647.1;AJY68434.1;ADI84955.1;AAR35572.1	M42;aminopeptidase,;hydrolase	0.113458	0.38021	0.970495	0	0	9700000	11900000	11400000	12800000	10700000	12200000
AAR35573.1;ADI84956.1;AJY68435.1;BEH09818.1;QVW34056.1;UAC02915.1;UTG91569.1;WP_010942837.1	BEH09818.1;UTG91569.1;UAC02915.1;QVW34056.1;WP_010942837.1;AJY68435.1;ADI84956.1;AAR35573.1	bifunctional;hypothetical;protein	-0.654351	0.186016	0.970495	0	0	2690000	3730000	3210000	2860000	2410000	848528
AAR35575.1;AJY68437.1;UAC02917.1;WP_010942839.1	WP_010942839.1;UAC02917.1;AJY68437.1;AAR35575.1	DUF3373;hypothetical;protein	-0.199174	0.675843	0.973029	0	0	2740000	1720000	3450000	2320000	1310000	3260000
AAR35576.1;ADI84959.1;AJY68438.1;BBA70651.1;BEH09815.1;QVW34059.1;UAC02918.1;UTG91572.1;WP_010942840.1;WP_119333011.1;WP_324311242.1	WP_324311242.1;BEH09815.1;UTG91572.1;UAC02918.1;QVW34059.1;WP_119333011.1;BBA70651.1;AJY68438.1;ADI84959.1;AAR35576.1;WP_010942840.1	hypothetical	0.368719	0.225397	0.970495	0	0	680915	660289	959972	844503	896788	1230000
AAR35577.1;ADI84960.1;AJY68439.1;QVW34060.1;UAC02919.1;UTG91573.1;WP_010942841.1	UTG91573.1;UAC02919.1;QVW34060.1;WP_010942841.1;AJY68439.1;ADI84960.1;AAR35577.1	cytochrome	-0.402969	0.494924	0.970495	0	0	420898	936947	416347	515026	457361	369435
AAR35583.1;ADI84966.1;AJY68445.1;BBA70658.1;QVW34066.1;UAC02925.1;UTG91579.1;WP_010942847.1;WP_119333017.1;WP_214302478.1	WP_324311233.1;WP_214302478.1;WP_119333017.1;WP_010942847.1;BEH09808.1;UTG91579.1;UAC02925.1;QVW34066.1;BBA70658.1;AJY68445.1;ADI84966.1;AAR35583.1	DNA;hypothetical	0.365643	0.280674	0.970495	0	0	596237	1060000	658116	811941	1030000	1140000
AAR35584.1;ADI84967.1;AJY68446.1;BBA70659.1;BEH09807.1;QVW34067.1;UAC02926.1;UTG91580.1;WP_232008898.1;WP_235044878.1;WP_324311231.1	WP_324311231.1;BEH09807.1;WP_235044878.1;WP_232008898.1;UTG91580.1;UAC02926.1;QVW34067.1;BBA70659.1;AJY68446.1;ADI84967.1;AAR35584.1	LptE;hypothetical;lipopolysaccharide;molecular	0.725211	0.258454	0.970495	0	0	154428	155351	440241	529812	446203	263875
AAR35588.1;ADI84970.1;AJY68450.1;BBA70662.1;BEH09804.1;QVW34070.1;UAC02929.1;UTG91583.1;WP_010942852.1;WP_286352174.1	WP_286352174.1;WP_010942852.1;BEH09804.1;UTG91583.1;UAC02929.1;QVW34070.1;BBA70662.1;AJY68450.1;ADI84970.1;AAR35588.1	MULTISPECIES:;chemotaxis;hypothetical;response	0.516483	0.344062	0.970495	0	0	1380000	3050000	1610000	1700000	3760000	3180000
AAR35589.1;ADI84971.1;AJY68451.1;QVW34071.1;UAC02930.1;UTG91584.1;WP_010942853.1	WP_010942853.1;WP_119333022.1;UTG91584.1;UAC02930.1;QVW34071.1;BBA70663.1;AJY68451.1;ADI84971.1;AAR35589.1	GAF;diguanylate	0.242061	0.593051	0.970495	0	0	2680000	4100000	1650000	2910000	2710000	4350000
AAR35591.1;ADI84973.1;AJY68453.1;BBA70665.1;BEH09801.1;QVW34073.1;UAC02932.1;UTG91586.1;WP_010942855.1;WP_286352171.1;WP_324311222.1	WP_286352171.1;WP_010942855.1;WP_324311222.1;BEH09801.1;UTG91586.1;UAC02932.1;QVW34073.1;BBA70665.1;AJY68453.1;ADI84973.1;AAR35591.1	CheR;Chemotaxis;MULTISPECIES:;chemotaxis;protein;protein-glutamate	-0.230602	0.440701	0.970495	1	0	246343	236633	350934	184905	234069	291750
AAR35592.1;ADI84974.1;AJY68454.1;QVW34074.1;UAC02933.1;UTG91587.1;WP_010942856.1	WP_324311220.1;WP_286352170.1;WP_119333024.1;WP_010942856.1;BEH09800.1;UTG91587.1;UAC02933.1;QVW34074.1;BBA70666.1;AJY68454.1;ADI84974.1;AAR35592.1	HEAT;HEAT-like;PBS	0.127155	0.74987	0.982577	0	0	813014	1220000	1950000	1340000	1510000	1500000
AAR35594.1;ADI84976.1;AJY68456.1;BEH09798.1;QVW34076.1;UAC02935.1;UTG91589.1;WP_010942858.1;WP_286352168.1	WP_010942858.1;WP_286352168.1;BEH09798.1;WP_119333026.1;UTG91589.1;UAC02935.1;QVW34076.1;BBA70668.1;AJY68456.1;ADI84976.1;AAR35594.1	MULTISPECIES:;chemotaxis;purine-binding;scaffold	0.815215	0.0115581	0.875241	0	0	1080000	754351	1030000	1630000	1660000	1750000
AAR35595.1;ADI84977.1;AJY68457.1;BBA70669.1;BEH09797.1;QVW34077.1;UAC02936.1;UTG91590.1;WP_010942859.1;WP_119333027.1	WP_010942859.1;WP_119333027.1;BEH09797.1;UTG91590.1;UAC02936.1;QVW34077.1;BBA70669.1;AJY68457.1;ADI84977.1;AAR35595.1	Response;chemotaxis;response	0.123599	0.492754	0.970495	0	0	1520000	1680000	1160000	1490000	1660000	1600000
AAR35596.2;ADI84978.1;AJY68458.1;QVW34078.1;UAC02937.1;UTG91591.1;WP_010942860.1	WP_119333028.1;WP_010942860.1;WP_286352166.1;WP_324311216.1;BEH09796.1;UTG91591.1;UAC02937.1;QVW34078.1;BBA70670.1;AJY68458.1;AAR35596.2;ADI84978.1	chemotaxis;purine-binding;scaffold	0.515541	0.142014	0.970495	0	0	1970000	2440000	3040000	4490000	3070000	3090000
AAR35597.1;ADI84979.1;AJY68459.1;BBA70671.1;BEH09795.1;QVW34079.1;UAC02938.1;UTG91592.1;WP_010942861.1;WP_119333029.1;WP_324311214.1	WP_324311214.1;WP_119333029.1;WP_010942861.1;BEH09795.1;UTG91592.1;UAC02938.1;QVW34079.1;BBA70671.1;AJY68459.1;ADI84979.1;AAR35597.1	AAA;ATPase;ATPase,;ExeA;hypothetical	0.528503	0.414465	0.970495	0	0	590984	462110	1720000	1490000	1280000	1230000
AAR35598.1;ADI84980.1;AJY68460.1;BBA70672.1;QVW34080.1;UAC02939.1;UTG91593.1;WP_010942862.1;WP_119333030.1	WP_010942862.1;WP_119333030.1;UTG91593.1;UAC02939.1;QVW34080.1;BBA70672.1;AJY68460.1;ADI84980.1;AAR35598.1	Chemotaxis;chemotaxis;sensor	0.207963	0.453232	0.970495	0	0	1100000	1400000	1950000	1700000	1680000	1760000
AAR35599.2;ADI84981.1;AJY68461.1;BBA70673.1;BEH09793.1;QVW34081.1;UAC02940.1;UTG91594.1;WP_010942863.1;WP_286352163.1	WP_010942863.1;WP_286352163.1;BEH09793.1;UTG91594.1;UAC02940.1;QVW34081.1;BBA70673.1;AJY68461.1;ADI84981.1;AAR35599.2	MULTISPECIES:;chemotaxis;hypothetical;response	-0.650691	0.414053	0.970495	0	1	423974	1870000	1890000	1270000	799201	595886
AAR35600.1;ADI84982.1;AJY68462.1;QVW34082.1;UAC02941.1;UTG91595.1;WP_010942864.1;WP_324311208.1	WP_324311208.1;UTG91595.1;UAC02941.1;QVW34082.1;WP_010942864.1;AJY68462.1;ADI84982.1;AAR35600.1	chemotaxis;response	0.427697	0.74631	0.981924	0	0	97601	103967	173155	43815	397669	62550
AAR35602.1;ADI84984.1;AJY68464.1;QVW36956.1;UAC05836.1;UTG94466.1;WP_193360270.1;WP_214303123.1	WP_324311205.1;BEH09790.1;UTG94466.1;WP_214303123.1;WP_193360270.1;UAC05836.1;QVW36956.1;BBA70676.1;AJY68464.1;ADI84984.1;AAR35602.1	GTP-binding;GTPase	-0.108732	0.534808	0.970495	0	0	7490000	5360000	6710000	5870000	5780000	6490000
AAR35606.1;ADI84988.1;BBA70680.1;UAC02946.1;WP_010942870.1;WP_119333036.1	WP_119333036.1;WP_045667296.1;WP_010942870.1;UTG91600.1;UAC02946.1;QVW34087.1;BBA70680.1;AJY68468.1;ADI84988.1;AAR35606.1	DNA	0.0586201	0.850193	0.991407	0	0	1470000	1850000	962412	1240000	1670000	1550000
AAR35607.1;ADI84989.1;AJY68469.1;BBA70681.1;BEH09785.1;QVW34088.1;UAC02947.1;UTG91601.1;WP_010942871.1;WP_045667297.1	WP_010942871.1;BEH09785.1;UTG91601.1;UAC02947.1;QVW34088.1;WP_045667297.1;BBA70681.1;AJY68469.1;ADI84989.1;AAR35607.1	MULTISPECIES:;PSP1;hypothetical;stage	-0.648237	0.159747	0.970495	0	0	1840000	2280000	1240000	1150000	1020000	1250000
AAR35608.1;ADI84990.1;BBA70682.1;BEH09784.1;UAC02948.1	BEH09784.1;UTG91602.1;UAC02948.1;QVW34089.1;WP_045667298.1;BBA70682.1;AJY68470.1;ADI84990.1;AAR35608.1	Methionine--tRNA;methionine--tRNA;methionyl-tRNA	0.412026	0.0578791	0.970495	0	0	8400000	8650000	9330000	13200000	11500000	10400000
AAR35611.1;ADI84993.1;AJY68473.1;QVW34092.1;UAC02951.1;UTG91605.1;WP_010942875.1;WP_045667299.1	BEH09781.1;WP_045667299.1;WP_010942875.1;UTG91605.1;UAC02951.1;QVW34092.1;AJY68473.1;ADI84993.1;AAR35611.1	RidA;endoribonuclease	-0.457621	0.259108	0.970495	0	0	1570000	1720000	948969	1080000	726758	1280000
AAR35612.1;ADI84994.1;AJY68474.1;QVW34093.1;UAC02952.1;UTG91606.1;WP_010942876.1	WP_286352154.1;WP_119333038.1;WP_010942876.1;BEH09780.1;UTG91606.1;UAC02952.1;QVW34093.1;BBA70686.1;AJY68474.1;ADI84994.1;AAR35612.1	GTP;GTP/GDP;RelA/SpoT;bifunctional	0.23081	0.289406	0.970495	0	0	3110000	2240000	2950000	3070000	3810000	2860000
AAR35615.1;ADI84997.1;AJY68477.1;QVW34095.1;UAC02954.1;UTG91608.1;WP_010942879.1	WP_324311193.1;WP_119333039.1;WP_010942879.1;BEH09777.1;UTG91608.1;UAC02954.1;QVW34095.1;BBA70689.1;AJY68477.1;ADI84997.1;AAR35615.1	YicC;YicC/YloC;hypothetical;stationary	-0.0848242	0.548504	0.970495	0	0	10700000	11300000	11800000	12200000	10500000	9170000
AAR35616.1;ADI84998.1;AJY68478.1;CBG01146.1;CBG16236.1;CBV14666.1;CBV29682.1;QVW34096.1;UAC02955.1;UTG91609.1;WP_010942880.1	BEH09776.1;UTG91609.1;UAC02955.1;QVW34096.1;WP_119333040.1;WP_010942880.1;BBA70690.1;AJY68478.1;ADI84998.1;AAR35616.1;CBV29682.1;CBV14666.1;CBG01146.1;CBG16236.1	UDP-glucose;UDP-glucose/UDP-N-acetylglucosamine;unnamed	0.142487	0.579168	0.970495	0	0	5020000	3490000	3050000	4100000	4640000	4020000
AAR35617.1;ADI84999.1;UAC02956.1;UTG91610.1;WP_010942881.1	WP_324311191.1;BEH09775.1;UTG91610.1;UAC02956.1;WP_010942881.1;ADI84999.1;AAR35617.1	NAD-dependent;UDP-galacturonate	0.187815	0.626551	0.970495	0	0	2110000	2350000	1150000	2780000	1700000	1910000
AAR35620.1;ADN78363.1;UAC05838.1;WP_235044879.1;WP_238525066.1	WP_235044879.1;WP_238525066.1;UAC05838.1;ADN78363.1;AAR35620.1	glycosyltransferase	-0.106849	0.355654	0.970495	0	0	653953	770075	700818	706683	676036	590443
AAR35621.1;ADI85002.1;UAC02959.1;WP_010942885.1	WP_010942885.1;UAC02959.1;ADI85002.1;AAR35621.1	UDP-2-acetamido-2,6-dideoxy-beta-L-mannose;UDP-N-acetylglucosamine;non-hydrolyzing	0.394573	0.315999	0.970495	0	0	1090000	1110000	2060000	1460000	2130000	2010000
AAR35622.1;ADI85003.1;UAC02960.1;WP_010942886.1	WP_010942886.1;UAC02960.1;ADI85003.1;AAR35622.1	UDP-N-acetylglucosamine;polysaccharide	0.308445	0.0526057	0.970495	0	0	1730000	1890000	1540000	1910000	2260000	2220000
AAR35623.1;ADI85004.2;UAC02961.1;WP_010942887.1	UAC02961.1;WP_010942887.1;ADI85004.2;AAR35623.1	SDR;UDP-2-acetamido-2,6-dideoxy-beta-L-arabino-4-hexulose;dTDP-4-dehydrorhamnose	0.235514	0.687783	0.973029	0	0	572363	496452	1330000	670271	1300000	853916
AAR35624.1;ADI85006.1;UAC02962.1;WP_010942888.1	WP_010942888.1;UAC02962.1;ADI85006.1;AAR35624.1	class;hypothetical;methionine	0.396566	0.415661	0.970495	0	0	1450000	912046	607558	1240000	919101	1750000
AAR35625.1;ADI85007.1;UAC02963.1;WP_010942889.1	UAC02963.1;WP_010942889.1;ADI85007.1;AAR35625.1	glycosyltransferase;hypothetical	0.26996	0.281469	0.970495	0	1	840284	523959	728534	835077	957564	730777
AAR35626.1;ADI85008.1;UAC02964.1;WP_010942890.1	WP_010942890.1;UAC02964.1;ADI85008.1;AAR35626.1	glycosyltransferase;glycosyltransferase,	0.788252	0.0434486	0.952267	0	1	118691	158742	88349	250416	208395	172887
AAR35628.1;ADI85010.1;UAC02966.1;WP_010942892.1	WP_045667306.1;WP_254278022.1;WP_286352146.1;WP_324311184.1;BEH09770.1;UTG91613.1;UAC02966.1;WP_010942892.1;BBA70696.1;ADI85010.1;AAR35628.1	ADP-heptose--lipopolysaccharide;putative	-0.324258	0.557321	0.970495	0	0	777263	901046	1630000	503052	869325	1270000
AAR35629.1;ADI85011.1;BEH09769.1;UAC02967.1;WP_010942893.1;WP_286352145.1;WP_324311182.1	WP_286352145.1;WP_324311182.1;BEH09769.1;WP_010942893.1;UAC02967.1;ADI85011.1;AAR35629.1	MULTISPECIES:;glycosyltransferase;glycosyltransferase,	-0.0867879	0.43601	0.970495	1	0	540134	529044	551039	546953	534869	443802
AAR35630.1;ADI85012.1;BBA70698.1;BEH09768.1;UAC02968.1;UTG91615.1;WP_010942894.1;WP_119333045.1;WP_286352144.1	WP_010942894.1;WP_286352144.1;BEH09768.1;WP_119333045.1;UTG91615.1;UAC02968.1;BBA70698.1;ADI85012.1;AAR35630.1	MULTISPECIES:;SPBc2;UDP-glucose--lipopolysaccharide;glycosyltransferase	0.109754	0.714425	0.974322	0	0	3350000	4170000	3360000	2970000	5160000	3610000
AAR35631.1;ADI85013.1;AJY68487.1;BBA70699.1;UAC02969.1;UTG91616.1;WP_010942895.1;WP_119333046.1	WP_324311179.1;BEH09767.1;UTG91616.1;UAC02969.1;WP_119333046.1;BBA70699.1;AJY68487.1;ADI85013.1;AAR35631.1;WP_010942895.1	hypothetical	0.608281	0.188915	0.970495	0	0	761604	1250000	494231	1550000	1010000	1260000
AAR35632.1;ADI85014.1;QVW34109.1;UAC02970.1;UTG91617.1;WP_010942896.1;WP_214302500.1	WP_324311177.1;WP_214302500.1;WP_010942896.1;BEH09766.1;UTG91617.1;UAC02970.1;QVW34109.1;ADI85014.1;AAR35632.1	ADP-heptose--lipopolysaccharide;lipopolysaccharide	-0.230788	0.474586	0.970495	0	0	1200000	1230000	690117	950404	888174	820290
AAR35633.1;ADI85015.1;AJY68489.1;BBA70701.1;QVW34110.1;UAC02971.1;UTG91618.1;WP_010942897.1;WP_045667310.1	WP_045667310.1;WP_010942897.1;UTG91618.1;UAC02971.1;QVW34110.1;BBA70701.1;AJY68489.1;ADI85015.1;AAR35633.1	Trm112;hypothetical;protein	1.47485	0.288459	0.970495	1	1	115545	63940	250707	104824	723615	367298
AAR35635.1;QVW34112.1;UAC02973.1;UTG91620.1;WP_010942899.1	WP_286352139.1;WP_119333047.1;WP_014551760.1;WP_010942899.1;WP_324311171.1;BEH09763.1;UTG91620.1;UAC02973.1;QVW34112.1;BBA70703.1;AJY68491.1;ADI85017.1;AAR35635.1	3-deoxy-D-manno-octulosonic;CMP-3-deoxy-D-manno-octulosonate--lipid	0.278751	0.2586	0.970495	0	0	366993	326047	455405	483373	373071	536785
AAR35636.1;ADI85018.1;AJY68492.1;BBA70704.1;CBF80831.1;CBG03084.1;CBU99672.1;CBV16604.1;QVW34113.1;UAC02974.1;UTG91621.1;WP_010942900.1;WP_045667313.1	WP_045667313.1;WP_010942900.1;BEH09762.1;UTG91621.1;UAC02974.1;QVW34113.1;BBA70704.1;AJY68492.1;ADI85018.1;AAR35636.1;CBU99672.1;CBV16604.1;CBG03084.1;CBF80831.1	ABC;Putative;lipid;phospholipid/lipopolysaccharide-flipping;unnamed	0.0572987	0.566199	0.970495	0	0	1700000	1980000	1750000	1830000	2040000	1780000
AAR35638.1;ADI85020.1;AJY68494.1;CBF90283.1;CBG01600.1;CBV03872.1;CBV15120.1;QVW34115.1;UAC02976.1;WP_010942902.1;WP_214302501.1	WP_286352136.1;WP_214302501.1;WP_254278024.1;WP_119333048.1;WP_010942902.1;BEH09760.1;UTG91623.1;UAC02976.1;QVW34115.1;BBA70706.1;AJY68494.1;ADI85020.1;AAR35638.1;CBV15120.1;CBV03872.1;CBG01600.1;CBF90283.1	DegT/DnrJ/EryC1/StrS;UDP-2-acetamido-2-deoxy-alpha-D-ribo-hexopyranos-3-ulose;erythromycin;unnamed	-0.141853	0.411467	0.970495	0	0	34300000	25900000	29500000	23800000	30000000	27500000
AAR35639.1;ADI85021.1;AJY68495.1;QVW34116.1;UAC02977.1;UTG91624.1;WP_010942903.1	WP_010942903.1;UTG91624.1;UAC02977.1;QVW34116.1;AJY68495.1;ADI85021.1;AAR35639.1	Gfo/Idh/MocA;UDP-N-acetyl-D-glucosamine;UDP-N-acetylglucosamine	0.0589813	0.804577	0.990742	0	0	3660000	5040000	4480000	4130000	3910000	5690000
AAR35640.1;ADI85022.1;AJY68496.1;QVW34117.1;UAC02978.1;UTG91625.1;WP_010942904.1	UTG91625.1;UAC02978.1;QVW34117.1;WP_010942904.1;AJY68496.1;ADI85022.1;AAR35640.1	UDP-N-acetylglucosamine;acyl-(acyl;acyl-ACP--UDP-N-acetylglucosamine	0.0304194	0.885334	0.995781	0	0	2300000	2400000	1870000	1830000	2700000	2180000
AAR35643.1;ADI85025.1;AJY68499.1;BBA70711.1;BEH09755.1;QVW34120.1;UAC02981.1;UTG91628.1;WP_010942907.1;WP_119333051.1	WP_119333051.1;WP_010942907.1;BEH09755.1;UTG91628.1;UAC02981.1;QVW34120.1;BBA70711.1;AJY68499.1;ADI85025.1;AAR35643.1	MULTISPECIES:;OmpH;OmpH-like;hypothetical;membrane	-0.0129779	0.964627	1	0	0	6910000	5310000	4530000	7070000	5110000	4420000
AAR35644.1;ADI85026.2;AJY68500.1;BBA70712.1;QVW34121.1;UAC02982.1;UTG91629.1;WP_010942908.1;WP_119333052.1	WP_324311161.1;WP_286352131.1;WP_119333052.1;WP_010942908.1;BEH09754.1;UTG91629.1;UAC02982.1;QVW34121.1;BBA70712.1;AJY68500.1;ADI85026.2;AAR35644.1	Outer;membrane;outer	-0.0337123	0.634898	0.970495	0	0	7710000	8250000	7420000	8020000	7670000	7150000
AAR35646.1;ADI85028.1;AJY68502.1;QVW34123.1;UAC02984.1;UTG91631.1;WP_010942910.1;WP_214302503.1;WP_254278025.1	WP_324311158.1;BEH09752.1;WP_254278025.1;WP_214302503.1;WP_119333054.1;WP_010942910.1;UTG91631.1;UAC02984.1;QVW34123.1;BBA70714.1;AJY68502.1;ADI85028.1;AAR35646.1	ABC;lipoprotein;lipoprotein-releasing	0.00934795	0.934545	1	0	0	3260000	2800000	3170000	2750000	3350000	3190000
AAR35647.1;ADI85029.1;UAC02985.1;WP_010942911.1	WP_324311156.1;WP_286352128.1;WP_119333055.1;WP_045667315.1;WP_010942911.1;BEH09751.1;UTG91632.1;UAC02985.1;QVW34124.1;BBA70715.1;AJY68503.1;ADI85029.1;AAR35647.1	lysine--tRNA;lysyl-tRNA	0.153296	0.141622	0.970495	0	0	22700000	22300000	21900000	26900000	23300000	24200000
AAR35648.1;ADI85030.1;AJY68504.1;BBA70716.1;QVW34125.1;UAC02986.1;UTG91633.1;WP_010942912.1;WP_119333056.1	WP_286352127.1;WP_119333056.1;WP_324311154.1;BEH09750.1;UTG91633.1;UAC02986.1;QVW34125.1;WP_010942912.1;BBA70716.1;AJY68504.1;ADI85030.1;AAR35648.1	ATS1;RCC1;hypothetical	0.0519521	0.740686	0.981652	0	0	11900000	11000000	10100000	11600000	13000000	9610000
AAR35652.1;ADI85034.1;AJY68508.1;QVW34129.1;UAC02990.1;UTG91637.1;WP_010942916.1	WP_324311148.1;WP_119333060.1;WP_010942916.1;BEH09746.1;UTG91637.1;UAC02990.1;QVW34129.1;BBA70720.1;AJY68508.1;ADI85034.1;AAR35652.1	DUF1015;hypothetical;protein	0.488655	0.0263554	0.948398	0	0	7130000	6610000	6030000	10400000	8530000	8810000
AAR35654.1;ADI85036.2;AJY71837.1;BBA70722.1;BEH09744.1;CBG05284.1;CBV18806.1;QVW34131.1;UAC02992.1;UTG91639.1;WP_010942918.1;WP_119333062.1;WP_254278026.1	WP_254278026.1;WP_119333062.1;WP_010942918.1;BEH09744.1;UTG91639.1;UAC02992.1;QVW34131.1;BBA70722.1;AJY71837.1;ADI85036.2;AAR35654.1;CBV18806.1;CBG05284.1	Peptide;peptide;unnamed	0.360288	0.261235	0.970495	0	0	825864	430404	786231	961532	873470	786918
AAR35658.2;ADI85042.1;UAC02994.1;WP_010942919.1	WP_045667317.1;WP_010942919.1;WP_286352119.1;BEH09742.1;WP_119333064.1;UTG91641.1;UAC02994.1;QVW34133.1;BBA70724.1;AJY68511.1;AAR35658.2;ADI85042.1	CBS;hemolysin	0.207096	0.316056	0.970495	0	0	586146	592917	755416	643536	869957	719597
AAR35661.1;ADI85045.2;UAC02997.1;WP_010942922.1	WP_254278027.1;WP_119333066.1;WP_045667318.1;WP_010942922.1;UTG91644.1;UAC02997.1;QVW34136.1;BBA70727.1;AJY68514.1;ADI85045.2;AAR35661.1	HD;HDIG;membrane-associated	-0.253963	0.389962	0.970495	0	0	1830000	1320000	2240000	1610000	1440000	1470000
AAR35663.1;ADI85047.1;AJY68516.1;BBA70729.1;QVW34138.1;UAC02999.1;UTG91646.1;WP_010942924.1	WP_010942924.1;WP_286352115.1;BEH09737.1;UTG91646.1;UAC02999.1;QVW34138.1;BBA70729.1;AJY68516.1;ADI85047.1;AAR35663.1	Response;chemotaxis;response	-0.48607	0.168834	0.970495	0	0	1390000	1380000	879958	921180	896077	788694
AAR35667.1;ADI85051.1;AJY68520.1;CAV21254.1;CAV24246.1;CAY03179.1;CBN60106.1;CBN60231.1;CBN60562.1;CBN62486.1;CBN68699.1;CBN70057.1;CBN70197.1;CBN71364.1;CBN71555.1;QVW34142.1;UAC03003.1;UTG91650.1;WP_010942928.1	WP_324311135.1;WP_119333071.1;WP_010942928.1;BEH09733.1;UTG91650.1;UAC03003.1;QVW34142.1;BBA70733.1;AJY68520.1;ADI85051.1;AAR35667.1;CBN62486.1;CBN68699.1;CBN71555.1;CBN71364.1;CBN60562.1;CBN60231.1;CBN70197.1;CBN70057.1;CBN60106.1;CAY03179.1;CAV24246.1;CAV21254.1	3-deoxy-7-phosphoheptulonate;3-deoxy-D-arabino-heptulosonate;phospho-2-dehydro-3-deoxyheptonate;unnamed	-0.243914	0.388288	0.970495	0	0	8280000	12800000	11000000	10900000	9100000	7090000
AAR35672.1;ADI85055.1;AJY68524.1;QVW34146.1;UAC03006.1;UTG91654.1;WP_010942933.1	WP_119333075.1;WP_010942933.1;BEH09728.1;pdb|3HC1|A;UTG91654.1;UAC03006.1;QVW34146.1;BBA70738.1;AJY68524.1;ADI85055.1;AAR35672.1	HD;HDOD;metal-dependent	0.284815	0.448855	0.970495	0	0	1500000	1930000	1610000	1700000	1620000	2820000
AAR35674.2;AJY68526.1;QVW34148.1;UAC03008.1;UTG91656.1;WP_010942935.1	WP_324311123.1;BEH09726.1;UTG91656.1;UAC03008.1;QVW34148.1;WP_119333077.1;BBA70740.1;AJY68526.1;AAR35674.2;ADI85057.2;WP_014551762.1;WP_010942935.1	hypothetical	0.128729	0.645912	0.972476	0	0	493841	643280	679975	529500	607499	849687
AAR35678.1;ADI85060.1;AJY68529.1;BBA70744.1;QVW34151.1;UAC03011.1;UTG91659.1;WP_010942939.1;WP_119333080.1	WP_119333080.1;WP_010942939.1;BEH09722.1;UTG91659.1;UAC03011.1;QVW34151.1;BBA70744.1;AJY68529.1;ADI85060.1;AAR35678.1	HAD;hypothetical;trehalose;trehalose-phosphatase	-0.220822	0.482386	0.970495	0	0	1290000	730800	936168	809784	867264	860256
AAR35681.1;QVW34154.1;UAC03014.1;WP_010942942.1	UTG91662.1;UAC03014.1;QVW34154.1;WP_014551766.1;WP_010942942.1;WP_045667327.1;BBA70747.1;AJY68532.1;ADI85063.1;AAR35681.1	peptidoglycan-associated;peptidoglycan-binding	-0.299741	0.385453	0.970495	0	0	20200000	15500000	13500000	17700000	13000000	9270000
AAR35682.1;ADI85064.1;AJY68533.1;BBA70748.1;CAY08720.1;QVW34155.1;UAC03015.1;UTG91663.1;WP_010942943.1;WP_119333082.1	WP_119333082.1;WP_010942943.1;UTG91663.1;UAC03015.1;QVW34155.1;BBA70748.1;AJY68533.1;ADI85064.1;AAR35682.1;CAY08720.1	5-(carboxyamino)imidazole;5-carboxyamino-1-(5-phosphoribosyl)imidazole;N5-carboxyaminoimidazole;phosphoribosylaminoimidazole;unnamed	-0.182279	0.145851	0.970495	0	0	22800000	23500000	27000000	20800000	23200000	20600000
AAR35683.1;ADI85065.1;AJY68534.1;BEH09717.1;QVW34156.1;UAC03016.1;UTG91664.1;WP_010942944.1	BEH09717.1;WP_010942944.1;UTG91664.1;UAC03016.1;QVW34156.1;AJY68534.1;ADI85065.1;AAR35683.1	carbonic	0.413918	0.358409	0.970495	0	0	1250000	419408	1050000	1300000	1340000	983065
AAR35684.1;ADI85066.1;QVW34157.1;UAC03017.1;UTG91665.1;WP_010942945.1;WP_214302509.1	WP_214302509.1;WP_286352094.1;WP_010942945.1;WP_119333084.1;WP_324311112.1;BEH09715.1;UTG91665.1;UAC03017.1;QVW34157.1;BBA70750.1;AJY68535.1;ADI85066.1;AAR35684.1	NAD-dependent;malate;malic	-0.237005	0.133349	0.970495	0	0	5440000	4540000	5070000	3680000	4720000	4370000
AAR35701.2;ADI85084.2;AJY68548.1;CBG22348.1;CBV35509.1;UAC03033.1;UTG91681.1;WP_223106385.1;WP_268741945.1;WP_274377820.1	WP_324311092.1;WP_286352080.1;WP_284676343.1;BEH09701.1;WP_274377820.1;WP_268741945.1;UTG91681.1;WP_223106385.1;UAC03033.1;QVW34169.1;WP_119333099.1;BBA70767.1;AJY68548.1;AAR35701.2;ADI85084.2;CBV35509.1;CBG22348.1	cation;cation-translocating;cation-transporting;unnamed	-0.257651	0.472465	0.970495	0	0	1940000	1080000	1260000	1030000	1230000	1320000
AAR35707.1;ADI85091.1;AJY68555.1;BBA70774.1;QVW34176.1;UAC03040.1;UTG91688.1;WP_010942969.1;WP_119333106.1	WP_119333106.1;WP_010942969.1;BEH09694.1;UTG91688.1;UAC03040.1;QVW34176.1;BBA70774.1;AJY68555.1;ADI85091.1;AAR35707.1	AAA;cytidylate;hypothetical	0.31767	0.589165	0.970495	0	0	1480000	2180000	1090000	1300000	3100000	1520000
AAR35710.1;ADI85093.1;AJY68557.1;QVW34178.1;UAC03042.1;UTG91690.1;WP_010942971.1	WP_324311076.1;WP_010942971.1;UTG91690.1;UAC03042.1;QVW34178.1;AJY68557.1;ADI85093.1;AAR35710.1	universal	0.149941	0.554513	0.970495	0	0	4250000	4100000	6350000	4770000	5610000	5930000
AAR35711.1;UAC03043.1;WP_010942972.1	UAC03043.1;WP_010942972.1;AJY68558.1;AAR35711.1	trehalose-6-phosphatase;trehalose-phosphatase	0.152737	0.621326	0.970495	0	0	711275	1300000	1380000	1410000	1230000	1130000
AAR35712.2;UAC03044.1;WP_010942973.1	WP_010942973.1;UAC03044.1;AAR35712.2;CBV06055.1;CBU95824.1;CBU94708.1;CBU93086.1;CBU91388.1;CBV18007.1;CBV12421.1;CBV02894.1;CBG04485.1;CBF98901.1;CBF88125.1;CBF92535.1;CBF68212.1;CBF66515.1;CBF72727.1;CBF70373.1	alpha,alpha-trehalose-phosphate;trehalose-6-phosphate	-0.0790946	0.613342	0.970495	0	0	2640000	3440000	2730000	2990000	2730000	2620000
AAR35720.1;ADI85104.1;AJY68568.1;QVW34189.1;UAC03053.1;UTG91701.1;WP_010942982.1	WP_324311057.1;UTG91701.1;UAC03053.1;QVW34189.1;WP_119333113.1;BBA70787.1;WP_010942982.1;AJY68568.1;ADI85104.1;AAR35720.1	TIGR00341;membrane	-0.170344	0.698668	0.974322	0	0	1020000	754399	1720000	945230	1030000	1130000
AAR35721.1;ADI85105.1;AJY68569.1;QVW34190.1;UAC03054.1;UTG91702.1;WP_010942983.1;WP_214302533.1	WP_214302533.1;UTG91702.1;UAC03054.1;QVW34190.1;WP_010942983.1;AJY68569.1;ADI85105.1;AAR35721.1	DUF481;hypothetical	-0.255978	0.101533	0.970495	0	0	2750000	2720000	2280000	2140000	2240000	2110000
AAR35726.2;ADI85109.1;AJY68573.1;UAC03058.1;UTG91706.1;WP_010942987.1;WP_014551785.1;WP_254278032.1	WP_254278032.1;WP_214302538.1;WP_119333118.1;WP_119332153.1;WP_014551785.1;WP_010942987.1;WP_010941731.1;WP_324312452.1;WP_324311045.1;BEH10934.1;UTG93752.1;UTG91706.1;UAC05115.1;UAC03058.1;QVW36303.1;QVW34194.1;BBA70792.1;BBA69602.1;AJY70792.1;AJY68573.1;AAR35726.2;AAR34396.2;ADI85109.1;ADI83909.1	cation;sodium;sodium/solute	-0.283863	0.00155079	0.491343	0	0	8840000	9010000	9080000	7330000	7620000	7170000
AAR35727.1;ADI85110.1;AJY68574.1;BBA70793.1;QVW34195.1;UAC03059.1;UTG91707.1;WP_010942988.1	WP_010942988.1;UTG91707.1;UAC03059.1;QVW34195.1;BBA70793.1;AJY68574.1;ADI85110.1;AAR35727.1	DUF485;MULTISPECIES:;hypothetical;protein	-0.312369	0.535287	0.970495	0	0	1000000	1030000	2070000	1310000	911806	1080000
AAR35731.1;ADI85112.1;AJY68579.1;BBA70795.1;QVW34197.1;UAC03061.1;UTG91709.1;WP_010942993.1;WP_045667342.1;WP_214302541.1	WP_045667342.1;WP_214302541.1;WP_010942993.1;UTG91709.1;UAC03061.1;QVW34197.1;BBA70795.1;AJY68579.1;ADI85112.1;AAR35731.1	Small-conductance;mechanosensitive	-0.36224	0.305043	0.970495	0	0	1590000	1250000	2000000	995305	1680000	1090000
AAR35732.1;ADI85113.1;AJY68580.1;BBA70796.1;QVW34198.1;UAC03062.1;UTG91710.1;WP_010942994.1;WP_119333122.1;WP_254278033.1;WP_324311040.1	WP_324311040.1;WP_254278033.1;WP_119333122.1;WP_010942994.1;UTG91710.1;UAC03062.1;QVW34198.1;BBA70796.1;AJY68580.1;ADI85113.1;AAR35732.1	Malto-oligosyltrehalose;malto-oligosyltrehalose;maltooligosyltrehalose	-0.365775	0.487661	0.970495	1	0	262793	484271	682394	456871	393247	259216
AAR35733.2;ADI85114.1;AJY68581.1;QVW34199.1;UAC03063.1;UTG91711.1;WP_010942995.1;WP_254278034.1	WP_010942995.1;WP_254278034.1;UTG91711.1;UAC03063.1;QVW34199.1;AJY68581.1;ADI85114.1;AAR35733.2	DUF3536;glycoside	-0.214556	0.379085	0.970495	0	0	445676	306002	394480	370570	355828	261374
AAR35734.1;ADI85115.1;AJY68582.1;QVW34200.1;UAC03064.1;UTG91712.1;WP_010942996.1;WP_254278035.1	WP_324311036.1;WP_254278035.1;UTG91712.1;UAC03064.1;QVW34200.1;WP_010942996.1;WP_119333124.1;BBA70798.1;AJY68582.1;ADI85115.1;AAR35734.1	malto-oligosyltrehalose;maltooligosyl;maltooligosyltrehalose	-0.0890119	0.678378	0.973029	0	0	956844	1030000	1370000	1200000	971119	984873
AAR35735.1;ADI85116.1;CAZ78767.1;CBN66171.1;CBN67330.1;CBN68873.1;CBN72263.1;QVW34201.1;UAC03065.1;WP_010942997.1	UAC03065.1;QVW34201.1;WP_010942997.1;ADI85116.1;AAR35735.1;CBN66171.1;CBN72263.1;CBN68873.1;CBN67330.1;CAZ78767.1	maltose;trehalose/maltose;unnamed	-0.763675	0.306216	0.970495	0	0	1130000	1060000	340286	401250	359016	730057
AAR35736.1;ADI85117.1;AJY68585.1;BEH09679.1;QVW34202.1;UAC03066.1;WP_010942998.1	WP_254278037.1;WP_119334095.1;WP_010942998.1;BEH09679.1;UTG91714.1;UAC03066.1;QVW34202.1;BBA70800.1;AJY68585.1;ADI85117.1;AAR35736.1	MarR;winged	0.66668	0.210931	0.970495	0	0	354715	901404	1270000	1010000	1340000	1660000
AAR35737.1;ADI85118.1;BEH09678.1;QVW34203.1;UAC03067.1;WP_010942999.1;WP_286352058.1;WP_324311032.1	WP_286352058.1;WP_010942999.1;WP_324311032.1;BEH09678.1;UAC03067.1;QVW34203.1;ADI85118.1;AAR35737.1	chloride;voltage-gated	-0.99431	0.341623	0.970495	0	0	669071	1430000	2990000	906129	870487	777975
AAR35739.1;ADI85120.1;AJY68588.1;BBA70803.1;BEH09676.1;QVW34205.1;UAC03069.1;UTG91717.1;WP_010943001.1;WP_119333128.1;WP_214302543.1;WP_254278040.1;WP_286352057.1;WP_324311029.1	WP_324311029.1;WP_286352057.1;BEH09676.1;WP_254278040.1;UTG91717.1;UAC03069.1;WP_214302543.1;QVW34205.1;WP_119333128.1;WP_010943001.1;BBA70803.1;AJY68588.1;ADI85120.1;AAR35739.1	dTDP-4-dehydrorhamnose	0.288266	0.280655	0.970495	0	0	1930000	1570000	1790000	2220000	2580000	1660000
AAR35741.3;ADI85122.1;AJY68590.1;QVW34207.1;UAC03071.1;UTG91719.1;WP_010943003.1;WP_254278041.1	WP_010943003.1;WP_254278041.1;WP_119333130.1;UTG91719.1;UAC03071.1;QVW34207.1;BBA70805.1;AJY68590.1;AAR35741.3;ADI85122.1	LPS;LPS-assembly;lipopolysaccharide	-0.0270572	0.865919	0.99447	0	0	925421	1130000	1010000	838466	1040000	1130000
AAR35742.2;ADI85123.1;AJY68591.1;BBA70806.1;CBF65363.1;CBF66869.1;CBU90234.1;CBU91742.1;QVW34208.1;UAC03072.1;UTG91720.1;WP_010943004.1;WP_119333131.1	WP_119333131.1;WP_010943004.1;UTG91720.1;UAC03072.1;QVW34208.1;BBA70806.1;AJY68591.1;AAR35742.2;ADI85123.1;CBU91742.1;CBU90234.1;CBF66869.1;CBF65363.1	Folylpolyglutamate;bifunctional;folylpolyglutamate;unnamed	0.255395	0.443644	0.970495	1	1	175872	116276	189428	135006	212470	227363
AAR35744.1;ADI85124.1;AJY68592.1;BBA70807.1;BEH09672.1;QVW34209.1;UAC03073.1;UTG91721.1;WP_010943005.1;WP_119333132.1	BEH09672.1;UTG91721.1;UAC03073.1;QVW34209.1;WP_119333132.1;WP_010943005.1;BBA70807.1;AJY68592.1;ADI85124.1;AAR35744.1	Acetyl-coenzyme;acetyl-CoA	-0.570535	0.317081	0.970495	0	0	3820000	4420000	1710000	2560000	1990000	2150000
AAR35746.1;ADI85126.1;AJY68594.1;BBA70809.1;QVW34211.1;UAC03075.1;UTG91723.1;WP_010943007.1;WP_119333134.1	WP_119333134.1;WP_010943007.1;WP_324311017.1;UTG91723.1;UAC03075.1;QVW34211.1;BBA70809.1;AJY68594.1;ADI85126.1;AAR35746.1	HAMP;Methyl-accepting;chemotaxis;methyl-accepting	0.155897	0.507975	0.970495	0	0	2010000	1860000	2790000	2350000	2230000	2840000
AAR35750.1;ADI85131.1;UAC03080.1;UTG91728.1;WP_010943012.1	UTG91728.1;UAC03080.1;ADI85131.1;AAR35750.1;WP_010943012.1	hypothetical	0.337941	0.255374	0.970495	0	0	975323	1350000	1140000	1560000	1090000	1730000
AAR35752.1;ADI85133.1;AJY68600.1;BEH09663.1;QVW34218.1;UAC03082.1;UTG91730.1;WP_010943015.1	BEH09663.1;UTG91730.1;UAC03082.1;QVW34218.1;WP_119333140.1;BBA70815.1;WP_010943015.1;AJY68600.1;ADI85133.1;AAR35752.1	TrpB-like;tryptophan	-0.174474	0.122546	0.970495	0	0	6130000	6050000	5290000	5070000	5310000	5100000
AAR35755.1;ADI85136.1;AJY68603.1;QVW34221.1;UAC03085.1;UTG91733.1;WP_010943018.1	WP_286352043.1;WP_119333142.1;WP_010943018.1;BEH09660.1;UTG91733.1;UAC03085.1;QVW34221.1;BBA70818.1;AJY68603.1;ADI85136.1;AAR35755.1	aminodeoxychorismate/anthranilate;anthranilate	0.138547	0.592909	0.970495	0	0	3250000	2080000	2210000	2380000	2800000	3120000
AAR35756.1;ADI85137.1;AJY68604.1;CBN61104.1;CBN63981.1;QVW34222.1;UAC03086.1;UTG91734.1;WP_010943019.1;WP_214302547.1;WP_254278044.1	WP_324310997.1;WP_286352042.1;BEH09659.1;WP_254278044.1;UTG91734.1;UAC03086.1;WP_214302547.1;QVW34222.1;WP_010943019.1;WP_119333143.1;BBA70819.1;AJY68604.1;ADI85137.1;AAR35756.1;CBN61104.1;CBN63981.1	anthranilate;unnamed	-0.0639631	0.580456	0.970495	0	0	2880000	2650000	2310000	2590000	2560000	2350000
AAR35772.2;ADI85158.1;AJY68629.1;BEH09644.1;QVW36963.1;UAC05843.1;WP_010943035.1;WP_045667373.1;WP_235044888.1;WP_324310957.1;WP_349256839.1;WP_350284125.1;WP_367326258.1	WP_367326258.1;WP_350284125.1;WP_010943035.1;WP_235044888.1;WP_045667373.1;WP_349256839.1;WP_324310957.1;BEH09644.1;UAC05843.1;QVW36963.1;AJY68629.1;AAR35772.2;ADI85158.1	HipA;phosphatidylinositol;type	-0.305226	0.474119	0.970495	0	0	246058	221458	305242	183330	129760	312315
AAR35773.1;ADI85159.1;UAC03105.1;UTG91755.1;WP_010943037.1	WP_010943037.1;UTG91755.1;UAC03105.1;ADI85159.1;AAR35773.1	acetoacetate	-0.281967	0.183697	0.970495	0	0	1030000	821559	951048	911488	629470	764099
AAR35776.1;ADI85162.2;AJY68633.1;QVW34241.1;UAC03108.1;UTG91758.1;WP_235044889.1	WP_235044889.1;UTG91758.1;UAC03108.1;QVW34241.1;AJY68633.1;ADI85162.2;AAR35776.1	GSU2403;hypothetical;nucleotidyltransferase;protein	0.240239	0.362125	0.970495	1	0	492665	294543	374027	412411	519190	440036
AAR35779.1;ADI85165.1;AJY68636.1;BBA70839.1;QVW34244.1;UAC03111.1;UTG91761.1;WP_010943043.1;WP_119333162.1	WP_119333162.1;WP_010943043.1;UTG91761.1;UAC03111.1;QVW34244.1;BBA70839.1;AJY68636.1;ADI85165.1;AAR35779.1	Curved;DnaJ;molecular	-0.608015	0.309649	0.970495	0	0	868317	971469	638110	213919	928515	483311
AAR35783.1;ADI85169.1;AJY68641.1;BBA70844.1;QVW34248.1;UAC03115.1;UTG91765.1;WP_010943047.1;WP_119333167.1	UTG91765.1;UAC03115.1;QVW34248.1;WP_119333167.1;BBA70844.1;WP_010943047.1;AJY68641.1;ADI85169.1;AAR35783.1	ATP-independent;Alpha-crystallin;Hsp20/alpha;molecular	-0.244084	0.657095	0.97248	0	0	976973	316623	631122	608673	447428	569038
AAR35786.1;ADI85172.1;AJY68644.1;BBA70847.1;BEH09638.1;QVW34251.1;UAC03118.1;UTG91768.1;WP_010943050.1;WP_039643582.1;WP_119333170.1;WP_286352023.1	WP_286352023.1;WP_039643582.1;WP_119333170.1;WP_010943050.1;BEH09638.1;UTG91768.1;UAC03118.1;QVW34251.1;BBA70847.1;AJY68644.1;ADI85172.1;AAR35786.1	ABC;MULTISPECIES:;putative	-0.151439	0.813656	0.991407	0	0	2260000	1120000	808646	1570000	1600000	601255
AAR35787.1;ADI85173.1;BBA70848.1;BEH09637.1;UAC03119.1;WP_010943051.1;WP_119333171.1;WP_286352022.1;WP_324310945.1	WP_302054678.1;WP_214302569.1;WP_010943051.1;WP_324310945.1;WP_286352022.1;WP_119333171.1;BEH09637.1;UTG91769.1;UAC03119.1;QVW34252.1;BBA70848.1;AJY68645.1;ADI85173.1;AAR35787.1	ABC;hypothetical;membrane	-0.393404	0.387278	0.970495	0	0	632981	444213	937153	426159	478882	628544
AAR35788.2;ADI85174.2;AJY68646.1;BBA70849.1;BEH09636.1;QVW34253.1;UAC03120.1;UTG91770.1;WP_010943052.1;WP_214302570.1;WP_238525072.1;WP_254278056.1	BEH09636.1;WP_254278056.1;WP_238525072.1;UTG91770.1;WP_214302570.1;UAC03120.1;QVW34253.1;BBA70849.1;WP_010943052.1;AJY68646.1;AAR35788.2;ADI85174.2	Esterase;LOW;SGNH-hydrolase;arylesterase;lipase	0.288992	0.424492	0.970495	0	0	458319	204745	324018	419251	381839	404913
AAR35798.1;ADI85185.1;AJY68656.1;QVW34263.1;UAC03130.1;UTG91780.1;WP_010943062.1	WP_010943062.1;WP_119333175.1;UTG91780.1;UAC03130.1;QVW34263.1;BBA70859.1;AJY68656.1;ADI85185.1;AAR35798.1	MULTISPECIES:;O-acetyl-L-homoserine;O-acetylhomoserine	-0.184126	0.307877	0.970495	0	0	7750000	6160000	5870000	5510000	6160000	5740000
AAR35799.1;ADI85186.1;UAC03131.1	WP_286352012.1;WP_250546348.1;BEH09625.1;WP_214302577.1;UTG91781.1;UAC03131.1;QVW34264.1;WP_119333176.1;BBA70860.1;AJY68657.1;ADI85186.1;AAR35799.1	McbC-like;nitroreductase	-0.0071303	0.986018	1	0	0	5650000	3100000	3420000	4920000	4560000	2630000
AAR35800.1;ADI85187.1;AJY68658.1;BBA70861.1;BEH09624.1;QVW34265.1;UAC03132.1;UTG91782.1	BEH09624.1;UTG91782.1;UAC03132.1;QVW34265.1;BBA70861.1;AJY68658.1;ADI85187.1;AAR35800.1	hypothetical	-0.270151	0.196288	0.970495	0	0	3820000	5270000	4730000	3760000	4200000	3500000
AAR35801.1;ADI85188.1;AJY68659.1;CBF60266.1;CBF61091.1;CBF62147.1;CBF64328.1;CBF68542.1;CBF95792.1;CBU85510.1;CBU86119.1;CBU87023.1;CBU89204.1;CBU93416.1;CBV09312.1;QVW34266.1;UAC03133.1;UTG91783.1;WP_010943065.1	WP_324310927.1;WP_286352011.1;BEH09623.1;UTG91783.1;UAC03133.1;QVW34266.1;WP_119333177.1;WP_010943065.1;BBA70862.1;AJY68659.1;ADI85188.1;AAR35801.1;CBU93416.1;CBU89204.1;CBU86119.1;CBU85510.1;CBV09312.1;CBU87023.1;CBF95792.1;CBF68542.1;CBF62147.1;CBF61091.1;CBF60266.1;CBF64328.1	pyruvate;unnamed	0.199196	0.260408	0.970495	0	0	13900000	14500000	12800000	17600000	16500000	13200000
AAR35802.1;UAC03134.1;WP_010943066.1	WP_324310925.1;WP_119333178.1;WP_045667380.1;WP_014551810.1;WP_010943066.1;WP_286352010.1;BEH09622.1;UTG91784.1;UAC03134.1;QVW34267.1;BBA70863.1;AJY68660.1;ADI85190.1;AAR35802.1	peptidylprolyl	-0.0334553	0.848661	0.991407	0	0	14000000	10600000	10300000	12100000	11400000	10600000
AAR35803.1;BBA70864.1;BEH09621.1;UAC03135.1	WP_014551811.1;BEH09621.1;UTG91785.1;UAC03135.1;QVW34268.1;BBA70864.1;AJY68661.1;ADI85191.2;AAR35803.1	Modulator;SPFH;flotillin;slipin	-0.0878728	0.606152	0.970495	0	0	15000000	12300000	16700000	15200000	13900000	12300000
AAR35804.2;BBA70865.1;UAC03136.1;WP_010943068.1;WP_119333179.1;WP_324310922.1	WP_286352009.1;WP_254278058.1;WP_119333179.1;WP_014551812.1;WP_324310922.1;BEH09620.1;UTG91786.1;UAC03136.1;QVW34269.1;BBA70865.1;WP_010943068.1;AJY68662.1;AAR35804.2;ADI85192.1	NfeD;hypothetical;membrane-bound;nodulation	-0.070898	0.840426	0.991407	0	0	1620000	1670000	1490000	2080000	1540000	930776
AAR35806.1;AJY68664.1;QVW34271.1;UAC03138.1;WP_010943070.1	WP_324310920.1;WP_286352007.1;WP_254278060.1;WP_010943070.1;WP_014551813.1;WP_119333181.1;BEH09618.1;UTG91788.1;UAC03138.1;QVW34271.1;BBA70867.1;AJY68664.1;ADI85194.1;AAR35806.1	AAA;ATP-dependent;Lon	0.102301	0.0499001	0.970495	0	0	9840000	9590000	10100000	10200000	10600000	10900000
AAR35808.1;BBA70869.1;UAC03140.1;UTG91790.1;WP_010943072.1;WP_119333183.1	WP_010943072.1;WP_014551815.1;WP_286352005.1;WP_324310916.1;BEH09616.1;WP_119333183.1;UTG91790.1;UAC03140.1;QVW34273.1;BBA70869.1;AJY68666.1;ADI85196.1;AAR35808.1	2-oxo;Dihydrolipoyllysine-residue;dihydrolipoamide;pyruvate	0.326212	0.519065	0.970495	0	0	499477	424404	742342	447666	621307	1020000
AAR35809.1;ADI85197.1;AJY68667.1;BBA70870.1;BEH09615.1;QVW34274.1;UAC03141.1;UTG91791.1	WP_324310914.1;BEH09615.1;UTG91791.1;UAC03141.1;QVW34274.1;BBA70870.1;AJY68667.1;ADI85197.1;AAR35809.1	2-oxoisovalerate;alpha-ketoacid;pyruvate	-0.217176	0.681908	0.973029	0	0	473052	291840	801985	547510	368416	431976
AAR35810.1;ADI85198.1;AJY68668.1;BEH09614.1;QVW34275.1;UAC03142.1;UTG91792.1;WP_010943074.1;WP_014551816.1;WP_214302579.1;WP_324310912.1	WP_119333184.1;WP_014551816.1;WP_214302579.1;WP_324310912.1;BEH09614.1;UTG91792.1;UAC03142.1;QVW34275.1;BBA70871.1;WP_010943074.1;AJY68668.1;ADI85198.1;AAR35810.1	3-demethylubiquinone-9;MULTISPECIES:;VOC;protein	0.200316	0.576778	0.970495	0	0	985256	1000000	906074	911337	1540000	870656
AAR35813.1;ADI85201.1;AJY68671.1;BBA70872.1;BEH09611.1;QVW34278.1;UAC03145.1;UTG91794.1;WP_014551817.1	BEH09611.1;UTG91794.1;UAC03145.1;QVW34278.1;BBA70872.1;AJY68671.1;ADI85201.1;AAR35813.1;WP_014551817.1	hypothetical	0.542278	0.349852	0.970495	0	0	991417	365889	338101	740367	877568	851035
AAR35814.1;UAC03146.1;WP_010943078.1	WP_286352002.1;WP_045667385.1;pdb|5BP7|C;pdb|5BP7|B;pdb|5BP7|A;WP_014551818.1;WP_010943078.1;BEH09610.1;UTG91795.1;UAC03146.1;QVW34279.1;AJY68672.1;ADI85202.1;AAR35814.1	SAM-dependent;class	-0.0495512	0.94469	1	0	0	1420000	755712	383321	1000000	342632	1130000
AAR35815.1;ADN78380.1;UAC03147.1;WP_010943079.1;WP_014551819.1	UAC03147.1;WP_014551819.1;WP_010943079.1;ADN78380.1;AAR35815.1	RelA/SpoT	0.164462	0.570795	0.970495	0	0	139708	99063	166369	165041	116142	172877
AAR35818.1;UAC03150.1;WP_010943084.1	WP_324310903.1;BEH09606.1;UTG91801.1;UAC03150.1;WP_214302584.1;QVW34284.1;WP_010943084.1;WP_119333190.1;WP_014551822.1;BBA70878.1;AJY68677.1;ADI85205.1;AAR35818.1	aconitate	-0.100847	0.53506	0.970495	0	0	3990000	3110000	3120000	3320000	2870000	3340000
AAR35819.1;UAC03151.1;WP_010943085.1	WP_324310901.1;WP_010943085.1;BEH09605.1;UAC03151.1;AAR35819.1	dihydrolipoamide;dihydrolipoyl	0.0983177	0.198737	0.970495	0	0	1970000	1810000	1750000	2020000	1870000	2030000
AAR35820.2;ADI85207.1;AJY68679.1;QVW36964.1;UAC05844.1;UTG94473.1;WP_235044890.1;WP_238525074.1	WP_238525074.1;WP_235044890.1;UTG94473.1;UAC05844.1;QVW36964.1;AJY68679.1;AAR35820.2;ADI85207.1	TPR-related;hypothetical;sel1;tetratricopeptide	0.196555	0.791592	0.98936	0	0	892665	149289	351632	454586	512949	629457
AAR35821.1;AJY68680.1;QVW34286.1;UAC03152.1;UTG91803.1;WP_010943087.1;WP_214302587.1	WP_324310897.1;WP_286351993.1;BEH09601.1;UTG91803.1;UAC03152.1;WP_214302587.1;QVW34286.1;WP_119333193.1;WP_010943087.1;BBA70881.1;AJY68680.1;AAR35821.1	2-oxoglutarate;dihydrolipoamide	-0.468417	0.264351	0.970495	0	0	1370000	865761	826536	571364	662336	979598
AAR35822.1;ADI85209.1;AJY68681.1;QVW34287.1;UAC03153.1;UTG91804.1;WP_010943088.1	WP_324310895.1;BEH09600.1;UTG91804.1;UAC03153.1;QVW34287.1;WP_010943088.1;WP_119333194.1;BBA70882.1;AJY68681.1;ADI85209.1;AAR35822.1	2-oxoglutarate	0.155553	0.701058	0.974322	0	0	1180000	473924	1050000	1170000	801761	1040000
AAR35823.1;ADI85210.1;UAC03154.1;UTG91805.1;WP_010943089.1;WP_014551826.1	WP_214302589.1;WP_014551826.1;WP_010943089.1;UTG91805.1;UAC03154.1;QVW34288.1;AJY68682.1;ADI85210.1;AAR35823.1	alpha/beta;hydrolase,	0.174046	0.259398	0.970495	0	0	869156	960128	1140000	1180000	1020000	1150000
AAR35825.1;UAC03156.1;WP_010943091.1	WP_286351988.1;WP_119333197.1;WP_014551828.1;WP_010943091.1;WP_324310887.1;BEH09596.1;UTG91807.1;UAC03156.1;QVW34290.1;BBA70886.1;AJY68684.1;ADI85212.1;AAR35825.1	copper-translocating;heavy	0.0862998	0.668317	0.97248	0	0	1350000	1220000	1810000	1600000	1580000	1470000
AAR35828.1;ADI85215.2;AJY68687.1;BBA70889.1;BEH09593.1;QVW36965.1;UAC05845.1;UTG94474.1;WP_010943094.1;WP_286352504.1	WP_286352504.1;WP_010943094.1;BEH09593.1;UTG94474.1;UAC05845.1;QVW36965.1;BBA70889.1;AJY68687.1;ADI85215.2;AAR35828.1	MULTISPECIES:;UPF0158;hypothetical	0.629737	0.158323	0.970495	0	0	912210	1510000	621835	1490000	1480000	1740000
AAR35829.1;BBA70890.1;BEH09592.1;UAC03159.1;WP_010943095.1;WP_119333200.1;WP_286351985.1;WP_324310884.1	WP_010943095.1;WP_286351985.1;WP_119333200.1;WP_324310884.1;BEH09592.1;UAC03159.1;BBA70890.1;AAR35829.1	MULTISPECIES:;UDP-2,3-diacylglucosamine;UDP-N-2,O-3-di-(3-hydroxyacyl)glucosamine/UDP-N-2,N-3-di-(3-hydroxyacyl)glucosediamine	-0.0430538	0.886473	0.995781	0	1	177669	143051	176571	103188	189792	189690
AAR35831.2;UAC03161.1;WP_010943097.1	WP_286351983.1;WP_014551832.1;WP_010943097.1;BEH09590.1;UTG91812.1;UAC03161.1;QVW34295.1;BBA70892.1;AJY68690.1;AAR35831.2;ADI85218.1	penicillin-binding;transpeptidase	0.111564	0.595277	0.970495	0	0	865823	1070000	1350000	1150000	1200000	1200000
AAR35834.2;ADI85220.1;AJY68692.1;BEH09588.1;QVW34297.1;UAC03163.1;UTG91814.1;WP_010943099.1;WP_286351981.1	WP_286351981.1;WP_010943099.1;BEH09588.1;UTG91814.1;UAC03163.1;QVW34297.1;AJY68692.1;AAR35834.2;ADI85220.1	YtxH;hypothetical	0.645121	0.547327	0.970495	0	0	10800000	18400000	32800000	24700000	62500000	9760000
AAR35836.2;BBA70897.1;BEH09585.1;UAC03166.1;WP_119333206.1;WP_223106386.1;WP_235044891.1;WP_286351979.1;WP_324310878.1	WP_235044891.1;WP_324310878.1;WP_286351979.1;BEH09585.1;WP_223106386.1;UAC03166.1;WP_119333206.1;BBA70897.1;AAR35836.2	GPMC;LOW;Spore;glycosyltransferase	-0.16937	0.545896	0.970495	0	0	326797	253012	195695	197150	258079	234373
AAR35839.1;ADI85225.1;AJY68698.1;BBA70899.1;QVW34302.1;UAC03168.1;UTG91819.1;WP_010943104.1;WP_014551837.1;WP_119333208.1	WP_286351978.1;BEH09583.1;UTG91819.1;UAC03168.1;QVW34302.1;WP_010943104.1;WP_014551837.1;WP_119333208.1;BBA70899.1;AJY68698.1;ADI85225.1;AAR35839.1	TIGR04442;hypothetical	0.341	0.487548	0.970495	0	0	359359	191446	493630	335752	379245	607920
AAR35842.1;UAC03172.1;WP_010943108.1	UAC03172.1;AAR35842.1;WP_010943108.1	hypothetical	-0.28616	0.475264	0.970495	0	0	336055	323596	584893	300962	356071	363595
AAR35848.2;AJY68713.1;BEH09578.1;UAC03177.1;WP_010943112.1;WP_324310863.1	WP_324310863.1;BEH09578.1;UTG91831.1;UAC03177.1;WP_214302592.1;QVW34306.1;WP_119333215.1;WP_014551840.1;WP_010943112.1;BBA70907.1;AJY68713.1;AAR35848.2;ADI85231.1	Fis;GPMC;sensor	-0.186952	0.480742	0.970495	0	0	2420000	2340000	3550000	2460000	2530000	2310000
AAR35849.1;BEH09577.1;UAC03178.1	BEH09577.1;WP_214302594.1;UTG91832.1;UAC03178.1;WP_119333216.1;WP_014551841.1;QVW34307.1;BBA70908.1;AJY68714.1;ADI85232.1;AAR35849.1	TPR;protein;tetratricopeptide	0.135545	0.443754	0.970495	0	0	1020000	1290000	1040000	1250000	1380000	1050000
AAR35850.1;UAC03179.1;WP_010943114.1	WP_286351972.1;WP_214302595.1;WP_324310860.1;BEH09576.1;UTG91833.1;UAC03179.1;QVW34308.1;WP_014551842.1;WP_010943114.1;ADI85233.1;AAR35850.1	B12-binding;radical	0.144186	0.215868	0.970495	0	0	551204	530079	637181	645427	587957	665702
AAR35859.1;AJY68724.1;BEH09568.1;QVW34316.1;UAC03187.1;UTG91841.1;WP_010943123.1;WP_045667406.1;WP_324310849.1	WP_045667406.1;WP_119333226.1;WP_010943123.1;WP_324310849.1;BEH09568.1;UTG91841.1;UAC03187.1;QVW34316.1;BBA70917.1;AJY68724.1;AAR35859.1	GTPase;cyclic;hypothetical	0.576473	0.209026	0.970495	0	1	357522	288878	239495	582127	438355	300564
AAR35862.1;ADI85246.2;AJY68726.1;QVW34319.1;UAC05846.1;UTG91844.1;WP_010943126.1;WP_014551851.1;WP_214302604.1	WP_119333229.1;WP_324311503.1;WP_286351962.1;WP_214302604.1;WP_014551851.1;WP_010943126.1;BEH09565.1;UTG91844.1;UAC05846.1;QVW34319.1;BBA70920.1;AJY68726.1;ADI85246.2;AAR35862.1	TatD;YchF/TatD;hydrolase;magnesium-dependent	0.0366433	0.89097	0.995781	0	0	1440000	1150000	1290000	1610000	1440000	929811
AAR35863.1;ADI85247.1;AJY68727.1;BEH09564.1;QVW34320.1;UAC03190.1;UTG91845.1;WP_010943127.1;WP_324310843.1	WP_324310843.1;BEH09564.1;WP_119333230.1;WP_010943127.1;UTG91845.1;UAC03190.1;QVW34320.1;BBA70921.1;AJY68727.1;ADI85247.1;AAR35863.1	MFS;OFA;membrane	0	1	1	0	0	2260000	1220000	1150000	1440000	1360000	1830000
AAR35865.1;ADI85249.1;UAC03192.1;UTG91847.1;WP_010943129.1;WP_014551852.1	UTG91847.1;UAC03192.1;WP_014551852.1;WP_010943129.1;ADI85249.1;AAR35865.1	HAMP;PAS;sensor	0.0891351	0.900044	0.9965	1	1	475419	1000000	876673	310855	1440000	751141
AAR35866.2;UAC03193.1;WP_010943130.1	WP_014551853.1;WP_010943130.1;UTG91848.1;UAC03193.1;AAR35866.2;ADI85250.1	NHL	0.0807827	0.525054	0.970495	0	0	2780000	2210000	2650000	2910000	2660000	2510000
AAR35868.1;ADI85252.2;AJY71844.1;BBA70926.1;BEH09559.1;QVW36967.1;UAC05847.1;UTG94475.1;WP_232008906.1;WP_235044893.1;WP_238525077.1;WP_286351957.1;WP_324310834.1	WP_238525077.1;WP_286351957.1;WP_235044893.1;WP_324310834.1;WP_232008906.1;BEH09559.1;UTG94475.1;UAC05847.1;QVW36967.1;BBA70926.1;AJY71844.1;ADI85252.2;AAR35868.1	C-type;MULTISPECIES:;cytochrome	0.0641458	0.84441	0.991407	0	0	413007	403648	227295	310106	452641	328667
AAR35869.1;UAC03195.1;WP_010943133.1	WP_324310832.1;WP_119333235.1;WP_014551856.1;WP_010943133.1;BEH09558.1;UTG91850.1;UAC03195.1;QVW34325.1;BBA70927.1;AJY68732.1;ADI85253.1;AAR35869.1	hypothetical;peptidyl-prolyl;peptidylprolyl	-0.00307939	0.986895	1	0	0	18600000	14900000	13400000	17500000	15600000	13700000
AAR35870.1;BEH09557.1;UAC03196.1;WP_286351955.1	WP_286351955.1;BEH09557.1;UAC03196.1;AAR35870.1	hypothetical;lipoprotein;lipoprotein,	0.572815	0.472428	0.970495	0	0	109568	101639	477780	240289	403853	380673
AAR35871.1;ADI85255.1;AJY68734.1;BBA70929.1;BEH09556.1;QVW34327.1;UAC03197.1;UTG91852.1;WP_010943135.1;WP_014551858.1;WP_119333237.1;WP_254278069.1;WP_286351954.1	WP_014551858.1;WP_119333237.1;WP_286351954.1;WP_010943135.1;WP_254278069.1;BEH09556.1;UTG91852.1;UAC03197.1;QVW34327.1;BBA70929.1;AJY68734.1;ADI85255.1;AAR35871.1	DUF799;GNA1162;MULTISPECIES:;hypothetical;lipoprotein;lipoprotein,	-0.590647	0.091014	0.970495	0	0	3400000	2400000	3100000	1790000	2620000	1500000
AAR35880.2;UAC03205.1;WP_010943145.1;WP_324310814.1	WP_324310814.1;WP_014551868.1;WP_010943145.1;UTG91860.1;UAC03205.1;QVW34336.1;AJY68743.1;AAR35880.2;ADI85264.1	HAMP;MULTISPECIES:;sensor	0.397926	0.352587	0.970495	0	0	479432	302465	365851	333575	673417	505295
AAR35886.1;ADI85272.1;AJY68747.1;BBA70944.1;BEH09541.1;QVW34341.1;UAC03211.1;UTG91865.1;WP_010943151.1;WP_014551873.1;WP_119333251.1;WP_286351940.1	WP_014551873.1;WP_010943151.1;WP_286351940.1;WP_119333251.1;BEH09541.1;UTG91865.1;UAC03211.1;QVW34341.1;BBA70944.1;AJY68747.1;ADI85272.1;AAR35886.1	Cbb3-type;MULTISPECIES:;c-type;cytochrome;lipoprotein	-0.592825	0.153894	0.970495	0	0	5320000	6540000	3780000	4460000	2540000	3370000
AAR35889.1;BEH09539.1;UAC03213.1;WP_010943153.1;WP_324310802.1	WP_010943153.1;WP_324310802.1;BEH09539.1;UAC03213.1;AAR35889.1	MULTISPECIES:;rhodanese;rhodanese-like	-0.0643767	0.624133	0.970495	0	0	12200000	11600000	10800000	12600000	9790000	10700000
AAR35891.1;ADI85275.1;AJY68750.1;BBA70947.1;BEH09537.1;QVW34344.1;UAC03215.1;UTG91869.1;WP_010943155.1;WP_119333254.1;WP_286351937.1	WP_119333254.1;WP_010943155.1;WP_286351937.1;BEH09537.1;UTG91869.1;UAC03215.1;QVW34344.1;BBA70947.1;AJY68750.1;ADI85275.1;AAR35891.1	MULTISPECIES:;ThiF;hypothetical;rhodanese;rhodanese-like	0.0256106	0.912174	0.999308	0	0	5450000	4190000	3760000	5360000	4490000	3790000
AAR35892.1;ADI85276.1;AJY68751.1;BBA70948.1;QVW34345.1;UAC03216.1;UTG91870.1;WP_010943156.1;WP_119333255.1	WP_119333255.1;WP_010943156.1;UTG91870.1;UAC03216.1;QVW34345.1;BBA70948.1;AJY68751.1;ADI85276.1;AAR35892.1	(R)-2-hydroxyacyl-CoA;2-hydroxyacyl-CoA;R-phenyllactate;double-cubane-cluster-containing;hypothetical	0.0591303	0.866827	0.99447	0	0	778503	525238	649435	711029	437253	886610
AAR35894.1;ADI85278.1;AJY68753.1;UAC03218.1;WP_010943158.1	UAC03218.1;WP_010943158.1;AJY68753.1;ADI85278.1;AAR35894.1	SirA;selenium;sulfurtransferase-like	0.0254941	0.89416	0.995781	0	0	2240000	2350000	1580000	2160000	1990000	2130000
AAR35896.1;ADI85280.1;AJY68755.1;QVW34349.1;UAC03220.1;UTG91874.1;WP_010943159.1	UTG91874.1;WP_119333258.1;WP_010943159.1;UAC03220.1;QVW34349.1;BBA70952.1;AJY68755.1;ADI85280.1;AAR35896.1	LysR;helix-turn-helix;selenium	0.0347332	0.832944	0.991407	0	0	3740000	2900000	4030000	3330000	3870000	3730000
AAR35898.1;ADI85282.1;AJY68757.1;BBA70954.1;BEH09532.1;QVW34351.1;UAC03222.1;UTG91876.1;WP_010943161.1;WP_119333260.1;WP_286351933.1	WP_119333260.1;WP_010943161.1;WP_286351933.1;BEH09532.1;UTG91876.1;UAC03222.1;QVW34351.1;BBA70954.1;AJY68757.1;ADI85282.1;AAR35898.1	NADPH;NADPH-flavin;nitroreductase	-0.200299	0.751206	0.982749	0	0	3980000	1010000	3110000	3200000	2370000	1480000
AAR35900.1;ADI85284.1;AJY68759.1;QVW34353.1;UAC03224.1;UTG91878.1;WP_010943163.1	WP_286351931.1;WP_119333261.1;WP_010943163.1;WP_324310790.1;BEH09530.1;UTG91878.1;UAC03224.1;QVW34353.1;BBA70956.1;AJY68759.1;ADI85284.1;AAR35900.1	nitrite;nitrite/sulfite	-0.0791439	0.39727	0.970495	0	0	9150000	9750000	9200000	9270000	9380000	7950000
AAR35901.2;ADI85285.1;AJY68760.1;QVW34354.1;UAC03225.1;UTG91879.1;WP_010943164.1	WP_119333262.1;WP_286351930.1;WP_010943164.1;WP_324310788.1;BEH09529.1;UTG91879.1;UAC03225.1;QVW34354.1;BBA70957.1;AJY68760.1;AAR35901.2;ADI85285.1	DUF6600;FecR;iron	-0.529377	0.560877	0.970495	0	0	1140000	140932	833817	196911	567914	700387
AAR35912.1;ADI85297.1;QVW34364.1;UAC03235.1;UTG91889.1;WP_010943175.1	WP_119333272.1;WP_286351919.1;WP_324310774.1;BEH09518.1;UTG91889.1;UAC03235.1;QVW34364.1;BBA70968.1;WP_010943175.1;AJY68828.1;ADI85297.1;AAR35912.1	carboxynorspermidine/carboxyspermidine;saccharopine	-0.119797	0.430333	0.970495	0	0	7460000	8970000	7540000	7990000	7780000	6290000
AAR35913.1;ADI85298.1;AJY68829.1;BBA70969.1;BEH09517.1;QVW34365.1;UAC03236.1;UTG91890.1;WP_010943176.1;WP_286351918.1	WP_286351918.1;WP_010943176.1;BEH09517.1;UTG91890.1;UAC03236.1;QVW34365.1;BBA70969.1;AJY68829.1;ADI85298.1;AAR35913.1	Cro/Cl;HTH-type;MULTISPECIES:;cupin;helix-turn-helix	0.343605	0.480957	0.970495	0	0	442951	348834	898492	574853	849286	720693
AAR35914.1;ADI85299.1;CBM38454.1;QVW34366.1;UAC03237.1;UTG91891.1;WP_010943177.1	WP_324310771.1;BEH09516.1;UTG91891.1;UAC03237.1;WP_119333273.1;WP_010943177.1;QVW34366.1;BBA70970.1;AJY68830.1;ADI85299.1;AAR35914.1;CBM38454.1	Delta-1-pyrroline-5-carboxylate;pyrroline-5-carboxylate;unnamed	0.0798261	0.407948	0.970495	0	0	6120000	7180000	7090000	7540000	7270000	6740000
AAR35916.2;ADI85301.1;AJY68832.1;BEH09514.1;QVW34368.1;UAC03239.1;UTG91893.1;WP_010943179.1;WP_214302637.1;WP_286351916.1;WP_324310769.1	WP_214302637.1;WP_286351916.1;WP_324310769.1;BEH09514.1;WP_010943179.1;UTG91893.1;UAC03239.1;QVW34368.1;AJY68832.1;AAR35916.2;ADI85301.1	MULTISPECIES:;polysaccharide	-0.283737	0.681073	0.973029	0	0	396450	473367	477425	317958	107497	681251
AAR35917.1;ADI85302.1;AJY68833.1;QVW34369.1;UAC03240.1;UTG91894.1;WP_010943180.1	UTG91894.1;UAC03240.1;QVW34369.1;WP_010943180.1;AJY68833.1;ADI85302.1;AAR35917.1	YggS;hypothetical;pyridoxal-5'-phosphate-dependent	-0.0943468	0.891732	0.995781	0	0	322703	178496	720467	329547	490905	323878
AAR35923.1;ADI85308.1;AJY68839.1;BBA70979.1;QVW34375.1;UAC03246.1;UTG91900.1;WP_010943186.1;WP_119333282.1	UTG91900.1;UAC03246.1;QVW34375.1;WP_119333282.1;WP_010943186.1;BBA70979.1;AJY68839.1;ADI85308.1;AAR35923.1	DNA;DNA-processing;hypothetical	0.170406	0.537147	0.970495	0	0	927633	1600000	1240000	1350000	1240000	1650000
AAR35924.1;ADI85309.2;AJY71852.1;QVW34376.1;UAC03247.1;UTG91901.1;WP_041914065.1	WP_041914065.1;WP_167447420.1;UTG91901.1;UAC03247.1;QVW34376.1;BBA70980.1;AJY71852.1;ADI85309.2;AAR35924.1	LysM;peptidoglycan-binding	0.143373	0.474773	0.970495	0	0	8710000	5930000	6990000	8590000	8230000	7070000
AAR35925.1;ADI85310.1;AJY68840.1;BBA70981.1;BEH09505.1;QVW34377.1;UAC03248.1;UTG91902.1;WP_010943188.1;WP_119333283.1;WP_324310754.1	WP_324310754.1;BEH09505.1;UTG91902.1;UAC03248.1;QVW34377.1;WP_010943188.1;WP_119333283.1;BBA70981.1;AJY68840.1;ADI85310.1;AAR35925.1	TPR;hypothetical;tol-pal	-0.255172	0.336718	0.970495	0	0	1390000	1920000	2180000	1320000	1700000	1580000
AAR35926.1;ADI85311.1;AJY68841.1;BBA70982.1;BEH09504.1;QVW34378.1;UAC03249.1;UTG91903.1;WP_010943189.1;WP_119333284.1;WP_286351907.1	WP_010943189.1;WP_286351907.1;BEH09504.1;WP_119333284.1;UTG91903.1;UAC03249.1;QVW34378.1;BBA70982.1;AJY68841.1;ADI85311.1;AAR35926.1	Undecaprenyl-phosphate;glycosyl;glycosyltransferase;undecaprenyl-phosphate	-0.27556	0.669369	0.97248	0	0	637707	194528	598849	322157	610359	249745
AAR35928.2;ADI85313.1;AJY68843.1;BBA70984.1;UAC03251.1;UTG91905.1;WP_010943191.1;WP_119333285.1;WP_254278083.1	WP_254278083.1;WP_119333285.1;WP_010943191.1;UTG91905.1;UAC03251.1;BBA70984.1;AJY68843.1;AAR35928.2;ADI85313.1	ArnT;Undecaprenyl;glycosyl;glycosyltransferase;glycosyltransferase,	0.336632	0.34381	0.970495	0	0	856021	883229	939111	1050000	1490000	842249
AAR35931.1;ADI85316.1;AJY68846.1;BBA70987.1;QVW34383.1;UAC03254.1;UTG91908.1;WP_010943194.1;WP_119333288.1;WP_324310747.1	WP_286351903.1;WP_119333288.1;WP_010943194.1;WP_324310747.1;BEH09499.1;UTG91908.1;UAC03254.1;QVW34383.1;BBA70987.1;AJY68846.1;ADI85316.1;AAR35931.1	RMD1;hypothetical;protein	-0.194552	0.711291	0.974322	0	0	367124	201672	547071	371316	396975	206803
AAR35934.1;ADI85320.1;AJY68850.1;BBA70991.1;QVW34387.1;UAC03258.1;UTG91912.1;WP_010943198.1;WP_045667489.1;WP_119333292.1	WP_119333292.1;WP_045667489.1;WP_010943198.1;UTG91912.1;UAC03258.1;QVW34387.1;BBA70991.1;AJY68850.1;ADI85320.1;AAR35934.1	DNA-binding;helix-hairpin-helix;hypothetical	-0.527046	0.0996816	0.970495	0	0	1340000	1170000	989033	561267	869249	997722
AAR35937.1;ADI85323.1;AJY68853.1;QVW34390.1;UAC03261.1;UTG91915.1;WP_010943201.1	WP_324310736.1;WP_119333295.1;WP_286351887.1;WP_010943201.1;BEH09482.1;UTG91915.1;UAC03261.1;QVW34390.1;BBA70994.1;AJY68853.1;ADI85323.1;AAR35937.1	DUF6178;hypothetical	0.137305	0.41037	0.970495	0	0	4260000	3880000	5080000	4370000	5460000	4710000
AAR35938.1;ADI85324.1;AJY68854.1;QVW34391.1;UAC03262.1;UTG91916.1;WP_010943202.1	WP_010943202.1;UTG91916.1;UAC03262.1;QVW34391.1;AJY68854.1;ADI85324.1;AAR35938.1	histidine;sensor;two-component	0.0424024	0.830722	0.991407	0	0	1830000	2000000	2540000	2310000	2410000	1840000
AAR35941.1;ADI85326.1;AJY68856.1;QVW34393.1;UAC03264.1;UTG91918.1;WP_010943204.1;WP_045667491.1	WP_286351884.1;WP_119333298.1;WP_045667491.1;WP_010943204.1;BEH09479.1;UTG91918.1;UAC03264.1;QVW34393.1;BBA70997.1;AJY68856.1;ADI85326.1;AAR35941.1	tRNA	0.417381	0.139049	0.970495	0	0	459404	480781	715905	710073	819508	682129
AAR35943.1;ADI85328.2;AJY68858.1;BEH09477.1;QVW34395.1;UAC03266.1;UTG91920.1;WP_010943206.1	BEH09477.1;WP_010943206.1;UTG91920.1;UAC03266.1;QVW34395.1;AJY68858.1;ADI85328.2;AAR35943.1	cysteine;nitrogen	0.235306	0.324108	0.970495	0	0	1310000	1320000	1660000	1630000	2030000	1390000
AAR35944.1;ADI85329.2;AJY68859.1;BBA71000.1;BEH09476.1;QVW34396.1;UAC03267.1;UTG91921.1;WP_119333301.1	BEH09476.1;UTG91921.1;UAC03267.1;QVW34396.1;WP_119333301.1;BBA71000.1;AJY68859.1;ADI85329.2;AAR35944.1	HTH-type;Rrf2;helix-turn-helix;transcriptional	-0.171126	0.547798	0.970495	0	0	2700000	2840000	1970000	2050000	1760000	2860000
AAR35945.1;ADI85330.1;AJY68860.1;CAY36419.1;QVW34397.1;UAC03268.1;UTG91922.1	WP_324310719.1;WP_286351881.1;WP_119333302.1;BEH09475.1;UTG91922.1;UAC03268.1;QVW34397.1;BBA71001.1;AJY68860.1;ADI85330.1;AAR35945.1;CAY36419.1	serine;unnamed	0.0319224	0.848486	0.991407	0	0	2810000	3920000	3550000	3460000	3820000	3230000
AAR35960.1;ADI85346.1;AJY68883.1;BBA71017.1;QVW34412.1;UAC03283.1;WP_010943224.1;WP_014551881.1;WP_119333313.1	WP_119333313.1;WP_014551881.1;WP_010943224.1;UAC03283.1;QVW34412.1;BBA71017.1;AJY68883.1;ADI85346.1;AAR35960.1	MarR;Transcriptional;winged	-0.33924	0.203664	0.970495	1	0	243449	239338	309831	173305	264242	188984
AAR35961.1;ADI85347.1;UAC03284.1;UTG91938.1;WP_010943225.1;WP_014551882.1;WP_254278089.1	WP_254278089.1;WP_119333314.1;WP_014551882.1;WP_010943225.1;UTG91938.1;UAC03284.1;BBA71018.1;ADI85347.1;AAR35961.1	dihydrolipoamide;dihydrolipoyl	0.380292	0.0377248	0.948398	0	0	3140000	2580000	3000000	3730000	4190000	3430000
AAR35973.1;ADI85350.2;AJY68899.1;BBA71022.1;BEH09416.1;QVW34425.1;UAC03300.1;WP_010943238.1;WP_014551891.1;WP_045667518.1;WP_119333318.1;WP_350284117.1	WP_254278093.1;WP_350284117.1;WP_045667518.1;WP_349256847.1;WP_014551891.1;WP_119333318.1;WP_010943238.1;BEH09416.1;UTG91942.1;UAC03300.1;QVW34425.1;BBA71022.1;AJY68899.1;ADI85350.2;AAR35973.1	TPR;hypothetical;tetratricopeptide	-0.150714	0.765222	0.985743	0	0	683968	295472	923102	629118	560738	523963
AAR35974.1;ADI85352.1;AJY68900.1;BBA71037.1;BEH09415.1;QVW34426.1;UAC03301.1;UTG91943.1	BEH09415.1;UTG91943.1;UAC03301.1;QVW34426.1;BBA71037.1;AJY68900.1;ADI85352.1;AAR35974.1	Integration;integration	0.240398	0.248579	0.970495	0	0	4340000	5030000	3370000	5220000	4560000	5270000
AAR35975.2;ADI85353.1;AJY68901.1;QVW34427.1;UAC03302.1;UTG91944.1;WP_010943240.1;WP_045667519.1	BEH09414.1;UTG91944.1;UAC03302.1;QVW34427.1;WP_045667519.1;WP_010943240.1;WP_119333335.1;BBA71038.1;AJY68901.1;AAR35975.2;ADI85353.1	30S;ribosomal	-0.0139617	0.944825	1	0	0	24500000	21400000	16400000	21800000	21800000	18100000
AAR35980.1;ADI85358.1;AJY68906.1;BBA71043.1;CBF76980.1;CBG12548.1;CBU97887.1;CBV26062.1;QVW34432.1;UAC03307.1;UTG91949.1;WP_010943245.1;WP_119333340.1	UTG91949.1;UAC03307.1;QVW34432.1;WP_119333340.1;WP_010943245.1;BBA71043.1;AJY68906.1;ADI85358.1;AAR35980.1;CBV26062.1;CBU97887.1;CBG12548.1;CBF76980.1	P-protein;chorismate;prephenate;unnamed	0.175658	0.426735	0.970495	0	0	919614	930286	710676	790967	961151	1140000
AAR35981.1;ADI85359.1;AJY68907.1;QVW34433.1;UAC03308.1;UTG91950.1;WP_010943246.1	WP_286351822.1;WP_010943246.1;WP_119333341.1;BEH09408.1;UTG91950.1;UAC03308.1;QVW34433.1;BBA71044.1;AJY68907.1;ADI85359.1;AAR35981.1	Flp;GspE/PulE;PilB/PulE/GspE;pilus	-0.160134	0.45827	0.970495	0	0	1710000	1380000	2050000	1440000	1480000	1680000
AAR35982.1;ADI85360.2;AJY68908.1;QVW34434.1;UAC03309.1;UTG91951.1;WP_010943247.1;WP_014551892.1	WP_014551892.1;WP_010943247.1;WP_119333342.1;UTG91951.1;UAC03309.1;QVW34434.1;BBA71045.1;AJY68908.1;ADI85360.2;AAR35982.1	LysM;peptidoglycan-binding	0.0363418	0.849569	0.991407	0	0	1330000	1050000	1540000	1190000	1380000	1450000
AAR35983.1;ADI85362.1;AJY68909.1;QVW34435.1;UAC03310.1;UTG91952.1;WP_010943248.1;WP_014551893.1;WP_045667522.1;WP_254278095.1	WP_254278095.1;UTG91952.1;UAC03310.1;QVW34435.1;WP_119333343.1;BBA71046.1;WP_045667522.1;AJY68909.1;ADI85362.1;AAR35983.1;WP_014551893.1;WP_010943248.1	hypothetical	0.12034	0.819237	0.991407	0	0	851685	946063	787226	1480000	507705	822139
AAR35984.1;ADI85363.1;AJY68911.1;BBA71047.1;BEH09405.1;QVW34436.1;UAC03311.1;UTG91953.1;WP_010943250.1;WP_119333345.1	BEH09405.1;UTG91953.1;UAC03311.1;QVW34436.1;WP_119333345.1;BBA71047.1;WP_010943250.1;AJY68911.1;ADI85363.1;AAR35984.1	Rubrerythrin-2;rubrerythrin	-0.0118806	0.951323	1	0	0	6360000	5850000	6080000	5750000	7410000	4980000
AAR35986.1;ADI85365.1;AJY68912.1;QVW34437.1;UAC03313.1;UTG91955.1;WP_010943252.1	WP_119333346.1;WP_010943252.1;UTG91955.1;UAC03313.1;QVW34437.1;BBA71049.1;AJY68912.1;ADI85365.1;AAR35986.1	single-stranded;single-stranded-DNA-specific	0.524039	0.256413	0.970495	0	0	548768	255891	757950	751551	713579	781864
AAR35987.1;ADI85366.1;AJY68913.1;BBA71050.1;QVW34438.1;UAC03314.1;UTG91956.1;WP_010943253.1;WP_119333347.1	WP_119333347.1;WP_010943253.1;UTG91956.1;UAC03314.1;QVW34438.1;BBA71050.1;AJY68913.1;ADI85366.1;AAR35987.1	TPR;hypothetical;tetratricopeptide	-0.231982	0.497251	0.970495	0	0	19900000	15900000	12000000	17600000	13100000	10000000
AAR35988.1;ADI85367.1;AJY68914.1;BBA71051.1;QVW34439.1;UAC03315.1;UTG91957.1;WP_010943254.1;WP_119333348.1	WP_119333348.1;WP_010943254.1;BEH09401.1;UTG91957.1;UAC03315.1;QVW34439.1;BBA71051.1;AJY68914.1;ADI85367.1;AAR35988.1	hypothetical;preprotein;protein	-0.221607	0.364526	0.970495	0	0	5390000	5220000	4700000	4890000	5100000	3140000
AAR35989.1;ADI85368.1;AJY68915.1;QVW34440.1;UAC03316.1;UTG91958.1;WP_010943255.1	WP_119333349.1;WP_010943255.1;BEH09400.1;UTG91958.1;UAC03316.1;QVW34440.1;BBA71052.1;AJY68915.1;ADI85368.1;AAR35989.1	preprotein;protein	-0.131517	0.0157742	0.948398	0	0	16900000	16400000	17200000	15000000	15900000	15200000
AAR35990.1;ADI85369.1;AJY68916.1;BBA71053.1;BEH09399.1;QVW34441.1;UAC03317.1;UTG91959.1;WP_010943256.1	WP_324312768.1;BEH09399.1;WP_010943256.1;UTG91959.1;UAC03317.1;QVW34441.1;BBA71053.1;AJY68916.1;ADI85369.1;AAR35990.1	hypothetical;preprotein	0.291135	0.193442	0.970495	0	0	10400000	11700000	10100000	15600000	11300000	12500000
AAR35991.2;ADI85370.2;AJY71858.1;QVW34442.1;UAC05850.1;UTG91960.1;WP_010943257.1;WP_014551895.1	WP_324312804.1;WP_286351813.1;BEH09398.1;UTG91960.1;WP_119334106.1;WP_014551895.1;WP_010943257.1;UAC05850.1;QVW34442.1;BBA71054.1;AJY71858.1;AAR35991.2;ADI85370.2	queuine;tRNA	0.256221	0.352855	0.970495	0	0	2070000	2160000	1430000	2380000	2630000	1750000
AAR35993.2;ADI85372.1;AJY68918.1;QVW34444.1;UAC03318.1;UTG91962.1;WP_010943259.1	WP_119334107.1;WP_286351811.1;WP_010943259.1;WP_324312763.1;BEH09396.1;UTG91962.1;UAC03318.1;QVW34444.1;BBA71056.1;AJY68918.1;AAR35993.2;ADI85372.1	SpoIID/LytB;cell	0.452441	0.0212693	0.948398	0	0	910650	722909	851179	1150000	1230000	1020000
AAR35995.1;ADI85374.1;AJY68920.1;QVW34446.1;UAC03320.1;UTG91964.1;WP_010943261.1;WP_014551896.1	WP_014551896.1;WP_010943261.1;WP_119333352.1;UTG91964.1;UAC03320.1;QVW34446.1;BBA71058.1;AJY68920.1;ADI85374.1;AAR35995.1	ABC;peptide	-0.152456	0.498217	0.970495	0	0	2000000	2180000	2900000	1850000	2250000	2270000
AAR35996.1;ADI85375.1;AJY68921.1;BBA71059.1;BEH09393.1;QVW34447.1;UAC03321.1;UTG91965.1;WP_010943262.1;WP_119333353.1	WP_119333353.1;WP_010943262.1;BEH09393.1;UTG91965.1;UAC03321.1;QVW34447.1;BBA71059.1;AJY68921.1;ADI85375.1;AAR35996.1	ABC;ATP-binding;Oligopeptide;peptide	0.0904494	0.827443	0.991407	0	0	1230000	835010	946113	595948	1420000	1190000
AAR35997.2;ADI85376.1;AJY68922.1;BBA71060.1;BEH09392.1;QVW34448.1;UAC03322.1;UTG91966.1;WP_010943263.1	WP_010943263.1;BEH09392.1;UTG91966.1;UAC03322.1;QVW34448.1;BBA71060.1;AJY68922.1;AAR35997.2;ADI85376.1	ArsR;MULTISPECIES:;Transcriptional;helix-turn-helix;metalloregulator;winged	0.336584	0.575896	0.970495	0	0	279526	349608	596050	253409	538480	755228
AAR36002.1;ADI85381.1;AJY68927.1;BBA71065.1;QVW34453.1;UAC03327.1;UTG91971.1;WP_010943268.1;WP_119333358.1	WP_119333358.1;WP_010943268.1;UTG91971.1;UAC03327.1;QVW34453.1;BBA71065.1;AJY68927.1;ADI85381.1;AAR36002.1	Serine/threonine-protein;metallophosphoesterase;metallophosphoesterase,;serine/threonine	0.933732	0.151156	0.970495	0	0	69052	48803	85667	98062	186423	104285
AAR36005.1;ADI85384.1;AJY68930.1;BBA71068.1;BEH09384.1;QVW34456.1;UAC03330.1;UTG91974.1;WP_010943271.1;WP_119333361.1	BEH09384.1;UTG91974.1;UAC03330.1;QVW34456.1;WP_119333361.1;BBA71068.1;AJY68930.1;WP_010943271.1;ADI85384.1;AAR36005.1	hypothetical;lipoprotein;lipoprotein,	-0.355523	0.32391	0.970495	0	0	6630000	4030000	4220000	3420000	4100000	4110000
AAR36008.1;ADI85387.1;QVW34459.1;UAC03333.1;UTG91977.1;WP_010943274.1	WP_010943274.1;WP_119333364.1;UTG91977.1;UAC03333.1;QVW34459.1;BBA71071.1;ADI85387.1;AAR36008.1	alpha-amylase	0.199841	0.551181	0.970495	0	0	3180000	1500000	2320000	2610000	2870000	2560000
AAR36009.1;ADI85388.1;AJY68934.1;BBA71072.1;QVW34460.1;UAC03334.1;UTG91978.1;WP_010943275.1;WP_119333365.1	WP_119333365.1;WP_010943275.1;WP_286351797.1;BEH09380.1;UTG91978.1;UAC03334.1;QVW34460.1;BBA71072.1;AJY68934.1;ADI85388.1;AAR36009.1	NAD(P)H-quinone;NADPH:quinone;Phthiocerol	-0.070237	0.573239	0.970495	0	0	6330000	7020000	5590000	6470000	5940000	5630000
AAR36011.1;ADI85390.1;QVW34462.1;UAC03336.1;UTG91980.1;WP_010943277.1;WP_238525078.1	UTG91980.1;WP_238525078.1;UAC03336.1;QVW34462.1;AJY68936.1;ADI85390.1;AAR36011.1;WP_010943277.1	hypothetical	0.369972	0.0488092	0.970495	0	0	960125	740364	922684	1200000	1010000	1180000
AAR36012.1;ADI85391.1;AJY71859.1;BBA71075.1;BEH09377.1;QVW34463.1;UAC03337.1;UTG91981.1;WP_010943278.1;WP_045668573.1;WP_119333368.1;WP_254278100.1	WP_045668573.1;WP_010943278.1;BEH09377.1;WP_254278100.1;UTG91981.1;UAC03337.1;QVW34463.1;WP_119333368.1;BBA71075.1;AJY71859.1;ADI85391.1;AAR36012.1	MULTISPECIES:;hypothetical;roadblock/LC7	0.302777	0.533449	0.970495	1	0	400042	344466	605556	376506	482932	805888
AAR36013.1;ADI85392.2;AJY68937.1;BBA71076.1;BEH09376.1;QVW34464.1;UAC03338.1;UTG91982.1;WP_010943279.1;WP_286351794.1;WP_324312747.1	WP_324312747.1;WP_286351794.1;WP_010943279.1;BEH09376.1;UTG91982.1;UAC03338.1;QVW34464.1;BBA71076.1;AJY68937.1;ADI85392.2;AAR36013.1	DUF4388;GTPase-activating;PATAN;hypothetical	0.702646	0.0540423	0.970495	0	0	1300000	1770000	2460000	2590000	3230000	3180000
AAR36015.2;ADI85394.2;AJY68939.1;BBA71078.1;BEH09374.1;QVW34466.1;UAC03340.1;UTG91984.1;WP_010943281.1;WP_119333369.1;WP_286351792.1	WP_286351792.1;BEH09374.1;UTG91984.1;UAC03340.1;QVW34466.1;WP_119333369.1;BBA71078.1;WP_010943281.1;AJY68939.1;AAR36015.2;ADI85394.2	C-type;cytochrome;lipoprotein	-0.441653	0.420511	0.970495	0	0	425801	546867	472598	163308	591153	309675
AAR36016.2;ADI85395.1;AJY68940.1;QVW34467.1;UAC03341.1;UTG91985.1;WP_010943282.1;WP_235044897.1	UTG91985.1;WP_235044897.1;UAC03341.1;QVW34467.1;AJY68940.1;AAR36016.2;ADI85395.1;WP_010943282.1	hypothetical	0.0583387	0.835489	0.991407	0	0	593130	749403	1000000	700642	765104	973454
AAR36017.2;ADI85396.2;AJY68941.1;BEH09372.1;QVW34468.1;UAC03342.1;UTG91986.1;WP_250546350.1	BEH09372.1;UTG91986.1;WP_250546350.1;WP_235044898.1;WP_232008911.1;UAC03342.1;QVW34468.1;BBA71080.1;AJY68941.1;AAR36017.2;ADI85396.2	cytochrome	-0.357237	0.19314	0.970495	0	0	4120000	2940000	2970000	2820000	2440000	2570000
AAR36019.1;ADI85399.1;AJY68943.1;QVW34470.1;UAC03344.1;UTG91988.1;WP_010943285.1	WP_286351787.1;WP_324312738.1;BEH09370.1;WP_119333372.1;WP_010943285.1;UTG91988.1;UAC03344.1;QVW34470.1;BBA71082.1;AJY68943.1;ADI85399.1;AAR36019.1	NAD-dependent;SDR	-0.142353	0.363373	0.970495	0	0	3360000	3360000	3710000	2630000	3570000	3250000
AAR36020.2;ADI85400.1;QVW34471.1;UAC03345.1;UTG91989.1;WP_010943286.1	UTG91989.1;UAC03345.1;QVW34471.1;WP_010943286.1;AAR36020.2;ADI85400.1	YqhA;hypothetical	-0.241153	0.508101	0.970495	1	0	285973	328367	338343	248182	175546	382308
AAR36021.1;ADI85402.1;QVW34473.1;UAC03347.1;UTG91991.1;WP_010943288.1	WP_324312733.1;BEH09367.1;UTG91991.1;UAC03347.1;QVW34473.1;WP_119333374.1;WP_010943288.1;BBA71085.1;AJY68946.1;ADI85402.1;AAR36021.1	amino;transporter	-0.464753	0.342466	0.970495	0	0	3240000	1640000	1910000	1160000	1950000	1810000
AAR36023.1;ADI85404.1;AJY68948.1;BBA71087.1;BEH09365.1;QVW34475.1;UAC03349.1;UTG91993.1;WP_010943290.1;WP_045667533.1;WP_119333376.1;WP_286351783.1	WP_045667533.1;WP_286351783.1;BEH09365.1;WP_119333376.1;WP_010943290.1;UTG91993.1;UAC03349.1;QVW34475.1;BBA71087.1;AJY68948.1;ADI85404.1;AAR36023.1	Glutamine;MULTISPECIES:;amino;glutamine	-0.689853	0.0516848	0.970495	1	0	393643	488696	477191	208170	374919	259707
AAR36028.1;ADI85409.1;AJY68952.1;BBA71092.1;BEH09360.1;QVW34480.1;UAC03354.1;UTG91998.1;WP_010943295.1;WP_014551902.1;WP_119333381.1;WP_286351779.1;WP_324312719.1	WP_286351779.1;WP_119333381.1;WP_010943295.1;WP_014551902.1;WP_324312719.1;BEH09360.1;UTG91998.1;UAC03354.1;QVW34480.1;BBA71092.1;AJY68952.1;ADI85409.1;AAR36028.1	2-oxo;Dihydrolipoyllysine-residue;MULTISPECIES:;branched-chain;dihydrolipoamide	-0.858291	0.482153	0.970495	0	0	364773	120079	963440	145084	379661	274141
AAR36036.1;ADI85416.1;AJY68958.1;BEH09351.1;QVW34487.1;UAC03361.1;UTG92005.1;WP_010943302.1;WP_254278102.1;WP_286351772.1	WP_010943302.1;WP_286351772.1;WP_254278102.1;WP_119333386.1;WP_324312709.1;BEH09351.1;UTG92005.1;UAC03361.1;QVW34487.1;BBA71099.1;AJY68958.1;ADI85416.1;AAR36036.1	RND;efflux	0.308107	0.0737873	0.970495	0	0	900023	820850	804219	1170000	1000000	956272
AAR36037.1;ADI85417.2;AJY68959.1;QVW34488.1;UAC03362.1;UTG92006.1;WP_010943303.1;WP_254278103.1	WP_119333387.1;WP_010943303.1;WP_286351771.1;WP_254278103.1;WP_324312707.1;BEH09350.1;UTG92006.1;UAC03362.1;QVW34488.1;BBA71100.1;AJY68959.1;ADI85417.2;AAR36037.1	RND;efflux	0.45728	0.0322387	0.948398	0	0	3540000	3040000	3180000	4990000	4400000	4010000
AAR36038.1;ADI85418.1;AJY68960.1;QVW34489.1;UAC03363.1;UTG92007.1;WP_010943304.1;WP_045667540.1	WP_119333388.1;WP_045667540.1;WP_010943304.1;WP_286351770.1;BEH09349.1;UTG92007.1;UAC03363.1;QVW34489.1;BBA71101.1;AJY68960.1;ADI85418.1;AAR36038.1	TetR;TetR/AcrR;transcriptional	0.0688167	0.785617	0.988936	1	0	335970	424139	371093	494388	300540	391540
AAR36047.1;AJY68968.1;QVW34498.1;UAC03372.1;WP_010943313.1;WP_214302661.1	WP_324312691.1;BEH09340.1;WP_214302661.1;WP_119333397.1;WP_014551906.1;WP_010943313.1;UTG92016.1;UAC03372.1;QVW34498.1;BBA71110.1;AJY68968.1;ADI85427.1;AAR36047.1	C1;peptidase	-0.551707	0.421963	0.970495	0	0	4970000	1960000	2290000	2210000	2730000	1350000
AAR36055.1;UAC03380.1;WP_010943321.1	WP_324312681.1;BEH09332.1;UAC03380.1;WP_214302664.1;QVW34506.1;WP_014551914.1;WP_119333403.1;WP_010943321.1;BBA71118.1;AJY68976.1;ADI85436.1;AAR36055.1	2-dehydropantoate;putative	0.213147	0.489325	0.970495	0	0	821973	483423	921212	718732	905555	956829
AAR36067.1;ADI85453.2;UAC03389.1	UAC03389.1;ADI85453.2;AAR36067.1	AdeC/AdeK/OprM;efflux	-0.336305	0.409154	0.970495	0	0	3850000	2000000	2470000	2340000	1940000	2310000
AAR36068.1;ADI85454.1;AJY68985.1;BBA71127.1;BEH09323.1;UAC03390.1;UTG92026.1;WP_010943334.1;WP_014551928.1;WP_045667557.1;WP_254278112.1;WP_324312667.1	WP_254278112.1;WP_214302669.1;WP_045667557.1;WP_014551928.1;WP_010943334.1;WP_324312667.1;BEH09323.1;UTG92026.1;UAC03390.1;QVW34523.1;BBA71127.1;AJY68985.1;ADI85454.1;AAR36068.1	Multidrug;efflux;multidrug	-0.369103	0.160861	0.970495	0	0	3670000	2540000	2960000	2150000	2580000	2370000
AAR36069.1;BBA71128.1;UAC03391.1;WP_010943335.1	WP_324312665.1;WP_010943335.1;BEH09322.1;UAC03391.1;BBA71128.1;AJY68986.1;AAR36069.1	Multidrug;efflux	0.0193365	0.950212	1	0	0	3070000	1790000	1810000	2350000	2260000	2150000
AAR36070.2;AJY68987.1;BBA71129.1;WP_010943336.1	WP_010943336.1;BBA71129.1;AJY68987.1;AAR36070.2	HTH-type;TetR;TetR/AcrR;transcriptional	0.208543	0.447184	0.970495	0	0	2650000	1910000	1870000	2140000	3080000	2210000
AAR36071.1;ADI85457.1;AJY68988.1;BBA71130.1;BEH09303.1;QVW34527.1;UAC03393.1;UTG92030.1;WP_010943337.1;WP_014551931.1	BEH09303.1;UTG92030.1;UAC03393.1;QVW34527.1;BBA71130.1;WP_014551931.1;WP_010943337.1;AJY68988.1;ADI85457.1;AAR36071.1	Molybdopterin;molybdenum;molybdopterin	0.487694	0.155537	0.970495	0	0	678848	570712	452942	643030	1000000	744221
AAR36072.1;AJY68989.1;BBA71131.1;UAC03394.1;WP_010943338.1	WP_192905466.1;pdb|3LR1|A;WP_324312639.1;WP_014551932.1;WP_010943338.1;BEH09302.1;UTG92031.1;UAC03394.1;QVW34528.1;BBA71131.1;AJY68989.1;ADI85458.1;AAR36072.1	hypothetical;substrate-binding;tungstate;tungsten	0.0855757	0.668426	0.97248	0	0	8320000	8920000	6160000	8880000	8850000	7100000
AAR36075.1;ADI85461.1;BEH09299.1;UAC03397.1;WP_010943341.1	WP_119333407.1;WP_010943341.1;BEH09299.1;UAC03397.1;BBA71134.1;ADI85461.1;AAR36075.1	gephyrin-like;molybdopterin;molybdopterin--molybdenum	0.35574	0.161773	0.970495	0	0	1480000	1820000	1170000	2100000	2010000	1610000
AAR36077.1;AJY68994.1;BBA71136.1;QVW34533.1;UAC03399.1;UTG92036.1;WP_010943343.1;WP_045667563.1;WP_324312634.1	WP_324312634.1;BEH09297.1;UTG92036.1;UAC03399.1;QVW34533.1;WP_045667563.1;WP_010943343.1;BBA71136.1;AJY68994.1;ADI85463.1;AAR36077.1	Molybdopterin;cytoplasmic;molybdopterin	0.295784	0.38721	0.970495	0	0	3790000	2330000	2010000	3270000	2910000	3800000
AAR36078.1;UAC03400.1;WP_010943344.1	UAC03400.1;WP_010943344.1;AAR36078.1	phosphate	-0.0575025	0.62511	0.970495	0	0	21100000	23700000	24300000	21700000	20000000	24700000
AAR36082.2;ADI85467.1;AJY68998.1;UAC03402.1;WP_010943347.1;WP_014551940.1	WP_324312631.1;WP_286351731.1;WP_254278117.1;WP_010943347.1;WP_214302675.1;WP_014551940.1;BEH09293.1;UTG92040.1;UAC03402.1;QVW34537.1;AJY68998.1;AAR36082.2;ADI85467.1	DUF3426;hypothetical;protein;zinc-ribbon	-0.078875	0.790546	0.988936	0	0	2440000	2270000	3560000	3000000	1980000	2850000
AAR36085.1;AJY71861.1;BBA71141.1;QVW34538.1;UAC03403.1;UTG92041.1;WP_010943348.1;WP_119334110.1	WP_324312629.1;BEH09292.1;WP_119334110.1;WP_014551941.1;WP_010943348.1;UTG92041.1;UAC03403.1;QVW34538.1;BBA71141.1;AJY71861.1;ADI85468.1;AAR36085.1	DUF1573;hypothetical;protein	0.00599595	0.979936	1	1	1	156283	168209	243651	181572	185999	202938
AAR36086.2;ADI85469.1;BEH09291.1;QVW34539.1;UAC03404.1;UTG92042.1;WP_010943349.1;WP_014551942.1	WP_014551942.1;WP_010943349.1;BEH09291.1;UTG92042.1;UAC03404.1;QVW34539.1;AJY68999.1;AAR36086.2;ADI85469.1	MBL;MULTISPECIES:;metal-dependent	-0.341939	0.112196	0.970495	0	0	313536	336953	272528	261562	273508	193172
AAR36087.1;BEH09290.1;QVW34540.1;UAC03405.1;UTG92043.1;WP_010943350.1;WP_286351729.1	WP_286351729.1;WP_010943350.1;BEH09290.1;UTG92043.1;UAC03405.1;QVW34540.1;AAR36087.1	InlB;MULTISPECIES:;fibronectin;hypothetical	0.26576	0.28088	0.970495	0	0	733854	447882	641709	752983	728582	710707
AAR36090.1;QVW34543.1;UAC03408.1;UTG92046.1;WP_010943353.1;WP_214302676.1;WP_254278119.1	WP_286351727.1;BEH09287.1;WP_254278119.1;UTG92046.1;WP_214302676.1;UAC03408.1;QVW34543.1;WP_119333415.1;BBA71146.1;WP_014551946.1;WP_010943353.1;AJY69003.1;ADI85473.1;AAR36090.1	Ni/Fe;bidirectional	-0.0722283	0.733437	0.980445	0	0	2500000	3810000	3110000	2800000	2900000	3260000
AAR36091.2;ADI85474.1;AJY69004.1;BBA71147.1;BEH09286.1;QVW34544.1;UAC03409.1;UTG92047.1;WP_010943354.1;WP_232008913.1	BEH09286.1;UTG92047.1;WP_232008913.1;UAC03409.1;QVW34544.1;BBA71147.1;AJY69004.1;AAR36091.2;ADI85474.1;WP_010943354.1	NAD-reducing;NADP;bidirectional;oxidoreductase	-0.161438	0.725936	0.975743	0	0	698198	624137	1360000	849181	806132	743052
AAR36096.2;ADI85479.1;AJY69009.1;BEH09281.1;QVW34549.1;UAC03414.1;UTG92052.1;WP_010943359.1;WP_014551949.1;WP_214302680.1	WP_214302680.1;WP_014551949.1;WP_010943359.1;BEH09281.1;UTG92052.1;UAC03414.1;QVW34549.1;AJY69009.1;AAR36096.2;ADI85479.1	CxxxxCH/CxxCH;cytochrome	0.139818	0.682948	0.973029	0	0	747749	789654	395769	829243	736376	564285
AAR36098.1;UAC03416.1;WP_010943361.1	WP_286351725.1;BEH09279.1;UTG92054.1;UAC03416.1;QVW34551.1;WP_119333421.1;BBA71154.1;AJY69011.1;ADI85481.1;AAR36098.1;WP_014551951.1;WP_010943361.1	hypothetical	-0.21982	0.704653	0.974322	0	0	4320000	1170000	3850000	2810000	3140000	2070000
AAR36104.1;AAR36110.1;ADI85486.1;ADI85490.1;BBA71159.1;QVW34557.1;UAC03422.1;UAC03426.1;UTG92059.1;UTG92063.1;WP_010943366.1	UTG92063.1;UTG92059.1;UAC03426.1;UAC03422.1;QVW34557.1;BBA71159.1;WP_010943366.1;ADI85490.1;ADI85486.1;AAR36110.1;AAR36104.1	C-type;cytochrome	-0.0591621	0.885906	0.995781	0	0	3280000	1490000	1950000	2510000	1940000	2000000
AAR36105.1;AAR36111.1;ADI85487.1;ADI85491.1;UAC03423.1;UAC03427.1;UTG92060.1;UTG92064.1;WP_010943367.1	BEH09268.1;BEH09264.1;UTG92064.1;UTG92060.1;UAC03427.1;UAC03423.1;QVW34558.1;WP_119333425.1;BBA71160.1;ADI85491.1;ADI85487.1;AAR36111.1;AAR36105.1;WP_010943367.1	hypothetical	0.00248526	0.985488	1	0	0	22000000	19000000	17000000	20300000	20200000	17600000
AAR36107.2;AAR36113.1;ADI85488.1;ADI85492.1;BEH09263.1;UAC03424.1;UAC03428.1;UTG92061.1;UTG92065.1;WP_010943368.1;WP_010943370.1;WP_254278121.1;WP_286351712.1	WP_119333426.1;WP_010943370.1;WP_010943368.1;WP_254278121.1;WP_286351712.1;WP_286351716.1;BEH09267.1;BEH09263.1;UTG92065.1;UTG92061.1;UAC03428.1;UAC03424.1;QVW34559.1;BBA71161.1;AAR36107.2;ADI85492.1;ADI85488.1;AAR36113.1	MULTISPECIES:;TetR/AcrR;transcriptional	0.123521	0.734492	0.980445	0	0	489630	576412	872572	856427	494008	761473
[truncated: 722 more rows]

## Sheet: (B) p-value <= 0.05
Protein.Group	Protein.Ids	Protein.Names	log2fc	pval	padj	NB.NA	DB.NA	NB1	NB2	NB3	DB1	DB2	DB3
[truncated: 95 more rows]

[truncated: 2 more sheets: (C) log2FC <= -0.58, (D) log2FC >= 0.58]
