# Supplementary material
Source: Research Square preprint supplement (doi:10.21203/rs.3.rs-8864095/v1)
Supplement: Supplementary file 3 [file 8e30d389c3e5b445e334a2e0.docx]

Supplementary Information for

**Cation-driven envelope dynamics modulate outer membrane vesiculation and extracellular electron transfer in *Geobacter***

Morgen M. Clark *et al.*

Corresponding author: Gemma Reguera, reguera@msu.edu

**This PDF file includes:**

Supplementary Methods

Supplementary References

Figs. S1 to S10

Tables S1 to S3

Datasets S1 to S2 (description, actual datasets provided as separate files)

**Supplementary Methods**

**AFM measurement of cell size.** Prior to analysis, the images were adjusted to the “minimum” color threshold in black & white and converted to 8-bit. Cells with more than ~20% of their length in contact were not counted; those with <20% cell contact were separated manually using the paintbrush function. The cell area was selected in the “set measurement” function and measured with the “analyze particles” function set for “size(um^2)” with a 0.4-Infinity to exclude OMVs, “circularity” of 0-1; “show: outlines”, “display results”, and “exclude on edges”. The data was manually curated to remove areas for cell aggregates.

**Proteomics data acquisition, processing, and analysis.** Samples were then run through Data-Independent Acquisition (DIA) LC/MS/MS to obtain peptide spectra. Automatic injections of 2 µl (200 ng) were made with an EASYnLC 1200 (ThermoFisher) onto Acclaim PepMap RSLC 0.1 mm x 20 mm C18 trapping columns (ThermoFisher) followed by a 5 min wash with buffer A (99.9% water/0.1% formic acid). A 65-minute elution of bound peptides was carried out into Acclaim PepMap RSLC 0.075 mm x 250 mm resolving columns (ThermoFisher), with a linear gradient from 5% buffer B (80% acetonitrile/0.1% formic acid/19.9% water) to 28% buffer B over 54 minutes. The column was then washed with 90% buffer B at a rate of 400 nl/min for the remainder of the run. Throughout this process, an integrated column oven (Sonation GmbH) was used to maintain the column temperature at 50°C. DIA of eluted peptides was carried out in a Q-Exactive HF-X mass spectrometer (ThermoFisher). Peptides were sprayed in using a FlexSpray spray ion source (ThermoFisher) and survey scans were conducted over a mass range of 400-1000 m/z in the Orbi trap (45,000 resolution, determined at m/z 200). Fixed windows (34 total at 20 m/z with a 1 m/z offset) were scanned and underwent fragmentation by HCD at a 15,000 resolution (determined at 200 m/z) in the Orbi trap, and Skyline1 was then used to optimize the windows.

Processing of DIA acquired spectra was with DIA-NN (v1.8.1).2 The Robust LC (high precision) quantitation strategy was employed, with RT-dependent cross-referencing and library-free mode Deep Learning against all protein sequences from *Geobacter sulfurreducens* (FASTA, downloaded 03/31/2025). DIA-NN optimized the search parameters and filtering of results was at a 1% precursor FDR. Mascot parameters for all databases used included: allow for up to two missed tryptic sites; fixed modification of carbamidomethyl cysteine; FDR calculated using randomized database searches.

The DIA-NN output (protein groups/IDs and their abundances for each replicate) provided by the MSU Proteomics Core was then imputed using the missForest package (v1.5)3 in R studio to fill in missing (NA) values. NB and DB replicates were imputed separately to avoid differences in treatment affecting the missForest imputation. The data was then processed in Excel to determine log2fold-change, *p*-value (by Welch’s *t*-test), and Benjamini-Hochberg adjusted *p*-value and filtered for a |log2 FC| > 0.58 and *p*-value < 0.05 to determine differentially expressed proteins (DEPs) (**Dataset S1**). Adjusted *p*-values were not used given the low number of DEPs. DEPs were then functionally categorized using the KEGG and UniProt4 databases. DEPs were also analyzed for subcellular localization via PSORTb (v3.0.3). Visualization was in heatmaps, dispersion plots, and volcano plots generated using the pheatmap (v 1.0.12) and ggplot2 (v 3.5.1) packages in the R studio, respectively.

**ECL heme stain for cytochromes.** Mid-exponential NBAF or DBAF cultures of the wild type and cytochrome mutant controls (∆*omcS* and ∆*omcB*) were normalized to an OD600 of 0.3, mixed 1:1 in Laemmli buffer with bromophenol blue, and incubated at 95oC for 10 min before a final resuspension in the buffer and separation in a 4-20% Mini-Protean TGX Stain-Free Precast Gel, 4-20% (Bio-Rad) against Precision Plus Protein™ All Blue Prestained Protein Standards using a Mini-Protean Vertical Electrophoresis Cell with 1X TGS buffer (diluted from Bio-Rad 10X Tris/Glycine/SDS buffer) operated at 300V for 15 min. The gel was transferred to a nitrocellulose membrane (Bio-Rad Trans-Blot Turbo Transfer System) before detecting the peroxidase activity of heme-containing proteins with an enhanced chemiluminescence (ECL) substrate5 by incubating the blot with shaking for 5 min in a solution of 10 ml of ECL peroxide and 10 ml of ECL enhancer (Clarity™ Western ECL Substrate, Bio-Rad) and chemiluminescence detection in a Bio-Rad ChemiDoc MP system.

**Supplementary References**

1. Maclean, B. *et al.* Skyline: An open source document editor for creating and analyzing targeted proteomics experiments. *Bioinformatics* **26**, 966–968 (2010).

2. Demichev, V., Messner, C. B., Vernardis, S. I., Lilley, K. S. & Ralser, M. DIA-NN: Neural networks and interference correction enable deep proteome coverage in high throughput. *Nat. Methods* **17**, 41–44 (2020).

3. Stekhoven, D. J. & Bühlmann, P. MissForest—non-parametric missing value imputation for mixed-type data. *Bioinformatics* **28**, 112–118 (2012).

4. UniProt Consortium. UniProt: The Universal Protein Knowledgebase in 2023. *Nucleic Acids Res.* **51**, D523–D531 (2023).

5. Vargas, C., McEwan, A. G. & Downie, J. A. Detection of *c*-type cytochromes using enhanced chemiluminescence. *Anal. Biochem.* **209**, 323–326 (1993).

**Supplementary Figures**


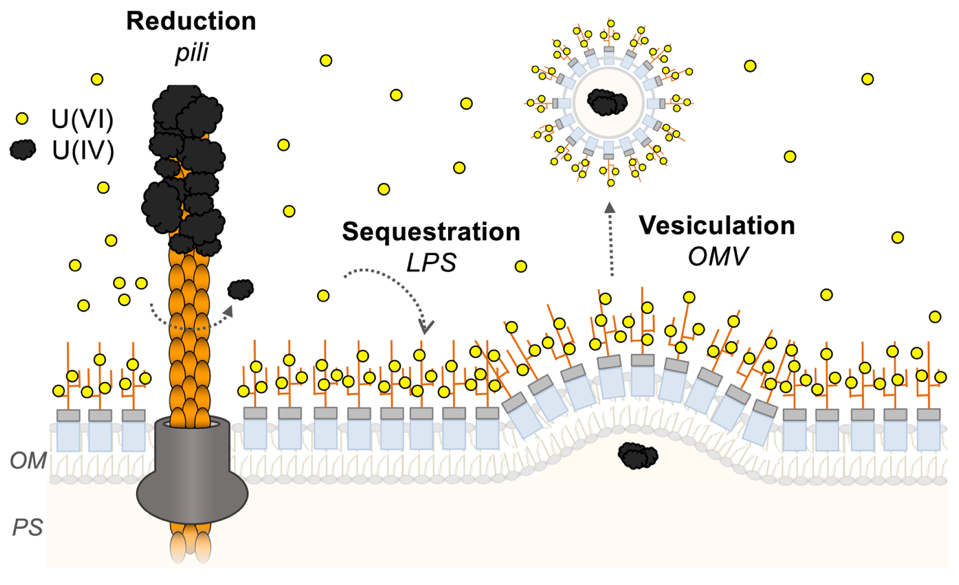


**Fig. S1. Current model of uranium detoxification by *G. sulfurreducens.*** Cells assemble conductive and retractable Type IVa pili to reductively precipitate the soluble uranyl cation (U[VI)) to a mononuclear U(IV) mineral using respiratory electrons stored in the abundant *c*-cytochromes of the periplasmic space (PS). For added protection, the cells coat their outer membrane (OM) with a rough (no O-antigen) lipopolysaccharide (LPS) and release outer membrane vesicles (OMVs) to detoxify the LPS-bound U(VI) and any U(IV) minerals reductively precipitated by the periplasmic *c*-cytochromes upon binding any U(VI) traversing the outer membrane.

**
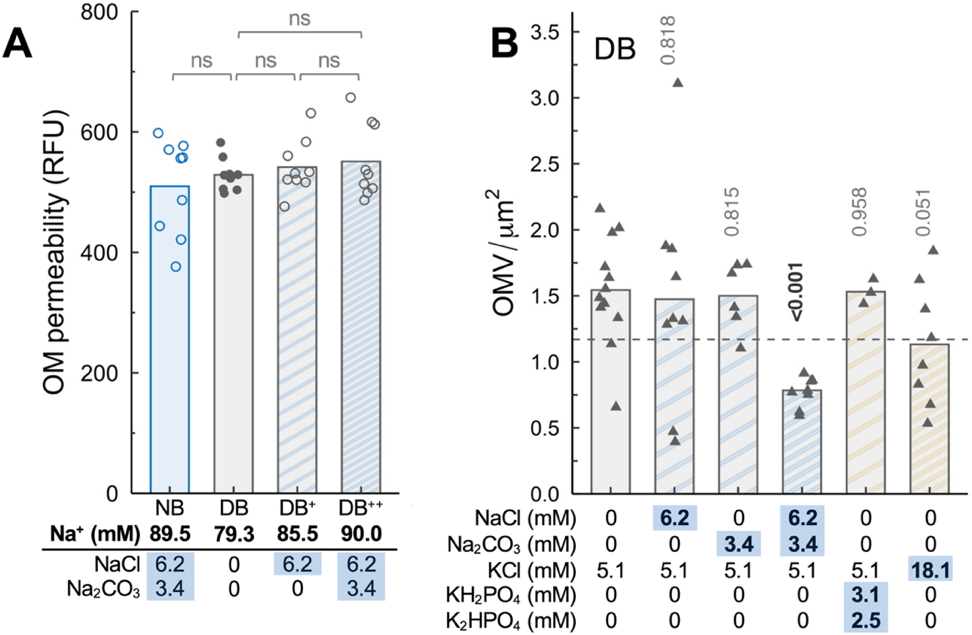
**

**Fig. S2. Impact of ionic strength on outer membrane (OM) permeability and vesiculation. (A)** OMpermeability was measured as relative fluorescence units (RFUs) emitted from NB, DB and salt-amended (DB+ and DB++) cultured cells (from **Fig. 1**) after OM intercalation of the hydrophobic probe 1-N-phenylnaphthylamine (NPN). **(B)** Vesiculation response to increases in sodium acetate (20 mM, instead of 15 mM as shown in the dashed line) and Na+ or K+ salt amendments, as indicated. Original NB salt concentrations are highlighted in blue. Statistical significance of treated versus untreated controls was assessed with a two-tailed *t*-test (*p* < 0.05 in bold) after a Grubb’s outlier test.


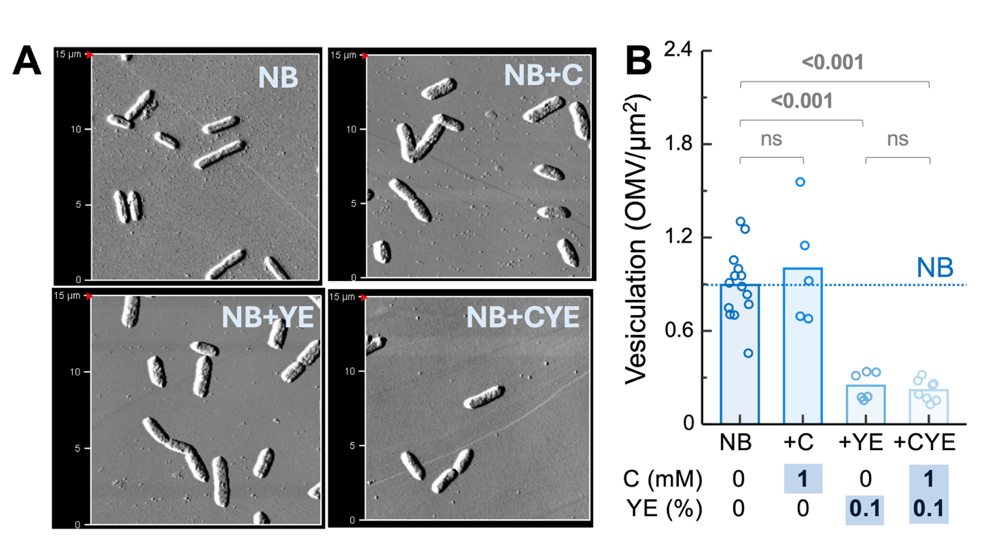


**Fig. S3. Attenuation of vesiculation in NB cultures via addition of Na+-enriched yeast extract.** AFM micrographs (**A**) used to quantitate OMV formation (**B**; per µm2 and OD600 of 0.5) in NB cultures without supplementation (average yields marked by horizontal dashed line) or addition of cysteine (“C”) and/or yeast extract ( “YE”). Statistical significance is from two-tailed *t*-tests (*p* < 0.05; ns, not significant) after Grubb’s outlier test.

**
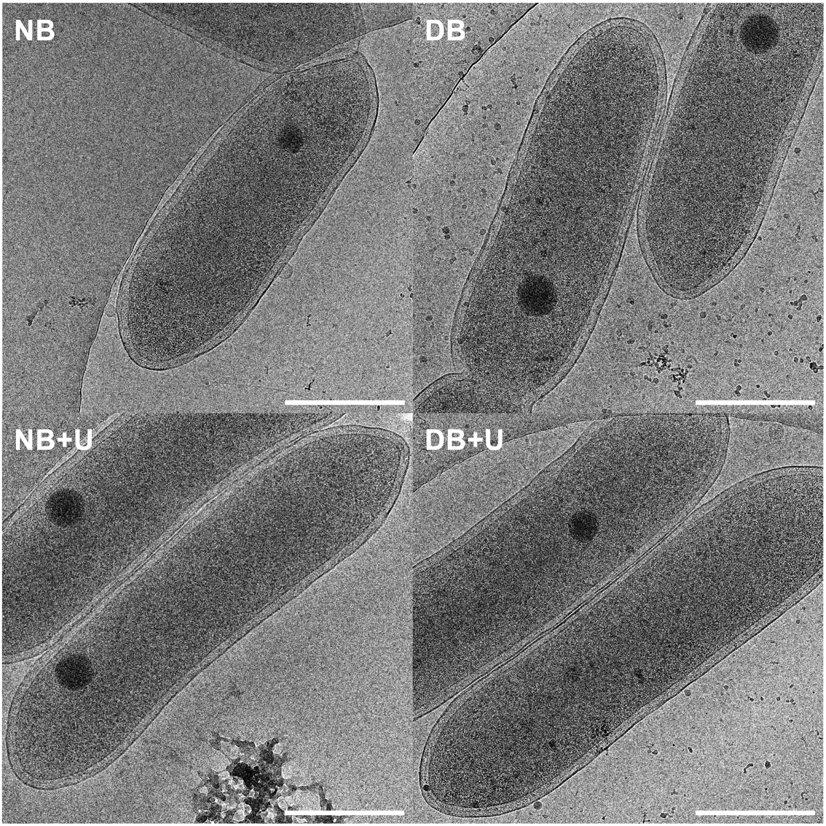
**

**Fig. S4. Cryo-electron micrographs of *G. sulfurreducens* cells.** Representative images of mid-exponential cells from acetate-fumarate NB and DB cultures with or without 500 µM uranyl acetate (scale bar, 500 nm). Cells imaged by cryo-EM were used to measure periplasmic widths.


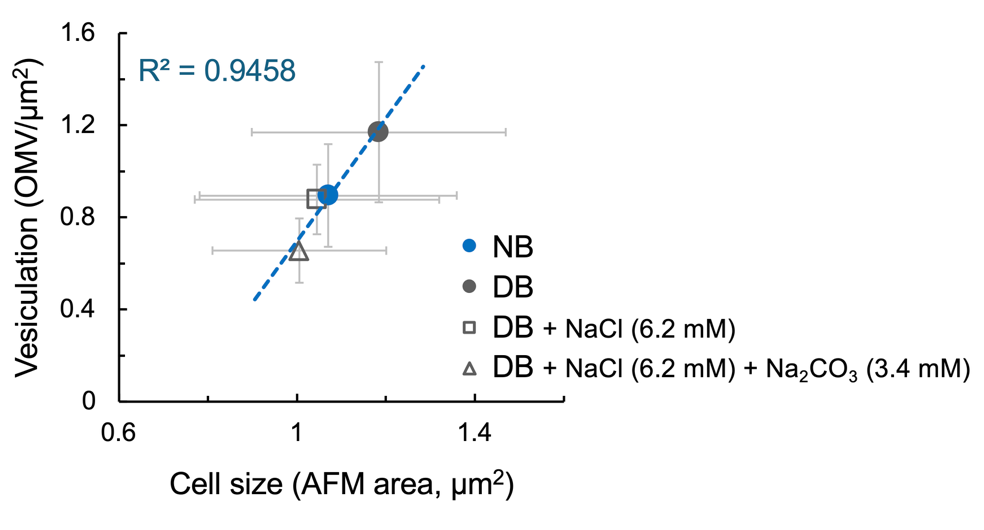


**Fig. S5. OVM formation vs cell size.** Positive correlation between average OMV formation and average cell size in NB, DB and salt-amended DB cultures. Shown are averages and standard deviation of triplicate cultures each sampled >3 times.


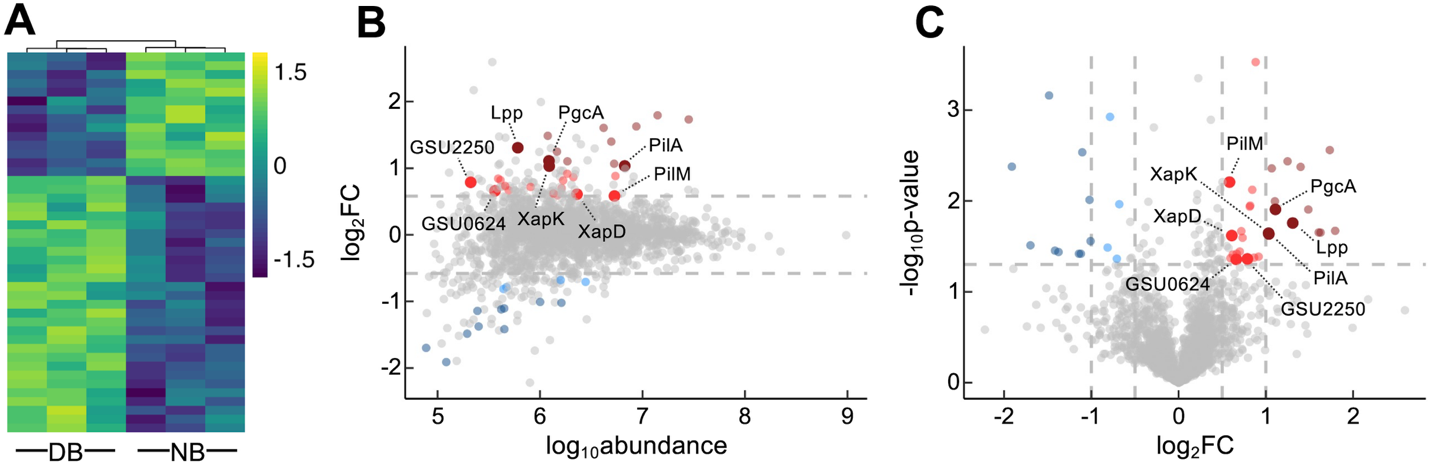


**Fig. S6. Proteomic reprogramming of cell envelope functions based on ionic strength of the cultivation medium.** **(A-C)** Proteomics heatmap **(A)**, log10abundance vs. log2FC dispersion plot **(B)**, and log2FC vs. -log10p-value volcano plot **(C)** showing *G. sulfurreducens* proteins differentially expressed (|log2FC| > 0.58, *p* < 0.05) in mid-exponential (OD600 0.4-0.6) acetate-fumarate cultures grown in DB or NB media. The dispersion plot in **(B)** and volcano plot in **(C)** include labels for differentially expressed proteins with predicted cell envelope roles (red = upregulated, blue = downregulated).


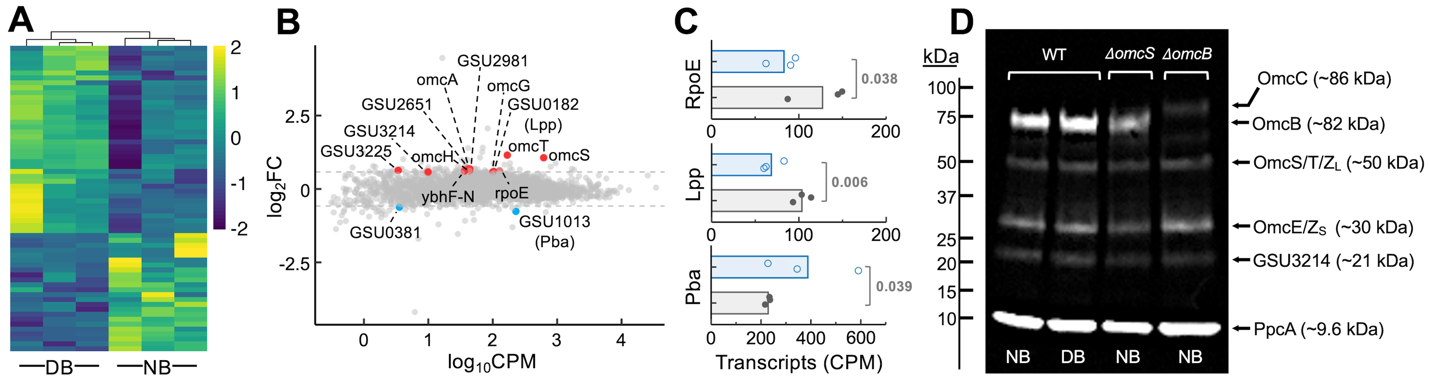


**Fig. S7. Transcriptional reprogramming of cell envelope functions based on ionic strength of the cultivation medium. (A-C)** RNA-seq heatmap (**A**), dispersion plot highlighting genes with predicted cell envelope functions (**B**), and transcript abundance for 3 relevant genes (**C**) differentially expressed (|log2FC| > 0.58, *p* < 0.05) in mid-exponential DB cultures compared to NB controls. **(D)** Heme-stained protein blots showing bands for cell envelope *c*-cytochrome expressed in NB and DB cultures in reference to NB-grown isogenic mutants carrying deletions in the *omcS* and *omcB* genes.


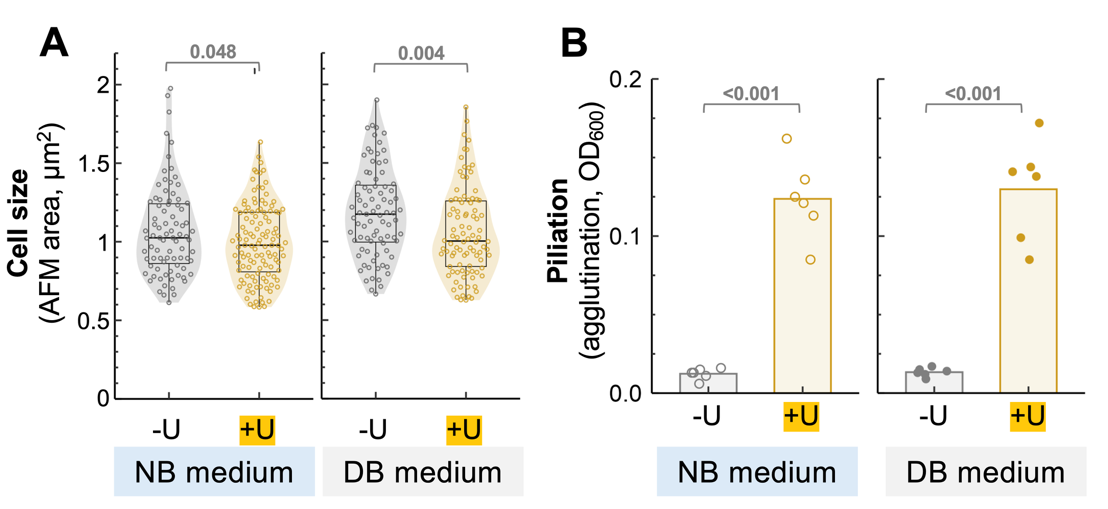


**Fig. S8. Impact of uranium treatment on cell size (A) and pili-mediated agglutination (B). (A)** Size (AFM area in µm2) of mid-exponential cells from NB or DB cultures growth with (+U) or without (–U) 500 µM uranyl acetate (data from **Fig. 3** but plotted to compare untreated versus uranium-treated cultures). (**B**) Pili-mediated agglutination in the cultures measured with the agglutination assays (difference in OD600 pre- and post-inversion of culture tubes at 18-h post-inoculation). The statistical significance was assessed with a two-tailed *t*-test (*p*<0.05 in bold) after removing outliers (0-1 per condition) with the Grubb’s outlier test.


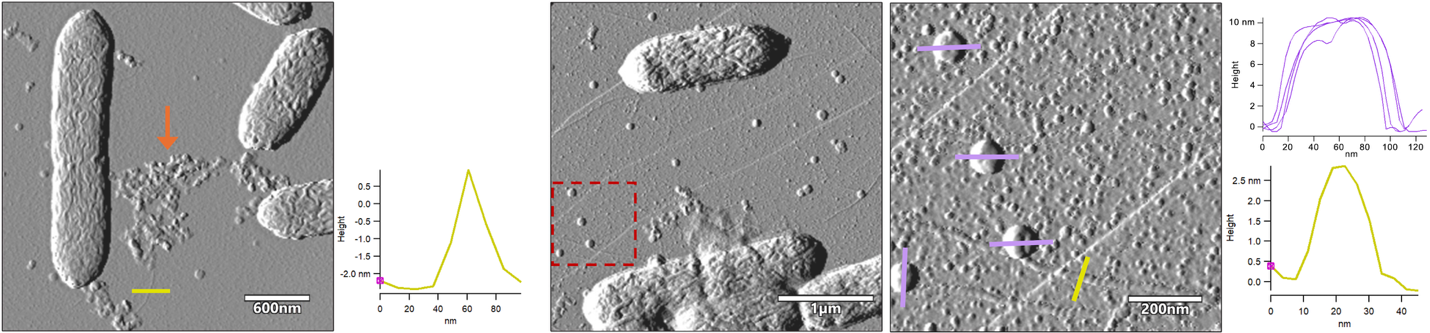


**Fig. S9. AFM topographic images of NB+U-grown cells with pili and OMVs.** AFM scans of piliated cells from mid-exponential phase NB cultures with 500 µM uranyl acetate (NB+U). Arrow points at pilus filaments interspersed with uranium minerals. Cross-sectional measurements of AFM heights for both pili (yellow) and OMVs (purple) are also shown (line, graph insets).


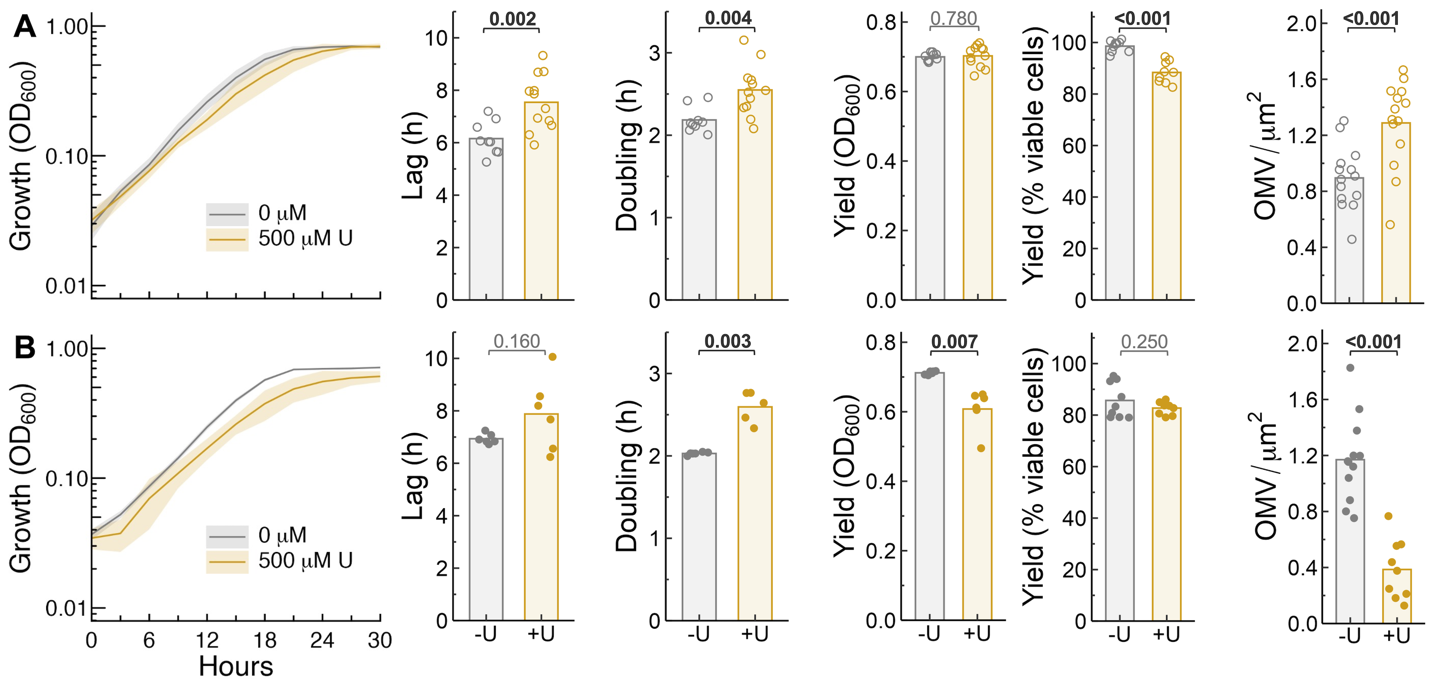


**Fig. S10. Pairwise comparison of uranium-treated versus untreated NB and DB cultures.** Cells were grown at 35oC in NB **(A)** or DB **(B)** cultures with 15 mM acetate and 40 mM fumarate in the presence (+U) or absence (–U) of 500 µM uranyl acetate. The growth data is as in **Fig. 2** but here it compares the untreated to treated growth curves and parameters such as la*g* phase, doubling times, yields as OD600 or % viable cells, and OMV production). Statistical differences were analyzed with a two-tailed *t*-test (*p* < 0.05 in bold) after removing outliers (0-1) with the Grubb’s test.

**Supplementary Tables Table S1. Chemical composition (minus vitamins) of acetate-fumarate NB and DB media** (notable differences are shaded in gray; Na+ salt differences are also bolded)

| **Chemical** | **NBAF (mM)** | **DBAF (mM)** |
| --- | --- | --- |
| KCl | 5.097 | 5.097 |
| NH4Cl | 3.739 | 3.739 |
| CaCl2 • 2H2O | 2.721*10-1 | 2.721*10-1 |
| MgSO4 • 7H2O | 4.057*10-1 | 8.114*10-1 |
| MnCl2 • 4H2O | 5.053*10-3 | 5.053*10-3 |
| FeSO4 • 7H2O | 1.079*10-2 | 1.079*10-2 |
| CoCl2 • 6H2O | 7.144*10-3 | 7.144*10-3 |
| ZnSO4 • 7H2O | 6.956*10-3 | ‒– |
| ZnCl2 | ‒– | 7.338*10-3 |
| CuCl2 • 2H2O | 1.760*10-3 | ‒– |
| CuSO4 • 5H2O | ‒– | 1.602*10-3 |
| AlK(SO4)2 • 12H2O | 1.054*10-4 | 1.054*10-4 |
| H3BO3 | 8.087*10-4 | 8.087*10-4 |
| Na2MoO4 | 4.371*10-3 | 4.371*10-3 |
| NiSO4 • 6H2O | 4.185*10-3 | ‒– |
| NiCl2 | ‒– | 9.259*10-3 |
| Na2WO4 • 2H2O | 6.063*10-4 | 6.063*10-4 |
| **Na2SeO4** | **1.006*10-3** | **5.293*10-3** |
| NTA (free acid) | 1.120*10-1 | 0.785*10-1 |
| Na-Acetate | 15 | 15 |
| Na-Fumarate | 40 | 40 |
| **NaHCO3** | **21.42** | **23.81** |
| **Na2CO3** • **H2O** | **3.44** | **‒–** |
| **NaH2PO4** • **H2O** | **‒–** | **0.50** |
| KH2PO4 | 3.09 | ‒– |
| K2HPO4 | 1.26 | ‒– |
| **NaCl** | **6.16** | **‒–** |

**Table S2. Cell envelope proteins differentially expressed in DB compared to NB media.**

| **Functional category** | **Locus** | **Protein** | **Gene product** | **log2FC** | **Subcellular localization1** |
| --- | --- | --- | --- | --- | --- |
| Peptidoglycan biosynthesis | GSU0182 | Lpp2 | lipoprotein, putative murein-binding | 1.31 | Not cytoplasmic |
| Electron transport | GSU1496 | PilA | type IV pilin | 1.03 | Inner membrane |
| GSU1761 | PgcA | *c*-type cytochrome | 1.11 | Extracellular |
| GSU2032 | PilM | type IV pilus assembly protein | 0.58 | Cytoplasmic |
| (Exo)polysaccharide biosynthesis | GSU0624 |  | glycosyltransferase, YqgM-like family | 0.66 | Cytoplasmic |
| GSU1501 | XapD | ABC transporter, ATP-binding | 0.61 | Cytoplasmic |
| GSU1508 | XapK | glycosyltransferase | 1.03 | Cytoplasmic |
| GSU2250 |  | glycosyltransferase, group 1 family protein | 0.79 | Cytoplasmic |

1Subcellular localization predicted by Psort v3.0.3 or UniProtKB database

2Annotation from this study

**Table S3. Differentially expressed (DB compared to NB) genes with predicted cell envelope functions.**

| **Functional category** | **Locus** | **Gene** | **Gene product** | **log2FC** | **Subcellular localization1** |
| --- | --- | --- | --- | --- | --- |
| Peptidoglycan biosynthesis and degradation | GSU0182 | *lpp*2 | lipoprotein, putative murein-binding | 0.597 | Not cytoplasmic |
| GSU0381 |  | lipoprotein, putative | –0.620 | Not cytoplasmic |
| GSU3225 |  | NHL repeat domain lipoprotein | 0.636 | Not cytoplasmic |
| GSU1013 | *pba*2 | peptidoglycan-binding lipoprotein, OmpA family | –0.762 | Outer membrane |
| Electron transport | GSU2503 | *omcT* | *c*-type cytochrome | 1.153 | Periplasmic or extracellular |
| GSU2504 | *omcS* | *c*-type cytochrome | 1.065 | Outer membrane |
| GSU2882 | *omcG* | *c*-type cytochrome | 0.582 | Extracellular |
| GSU2883 | *omcH* | *c*-type cytochrome | 0.611 | Periplasmic or extracellular |
| GSU2884 | *omcA* | *c*-type cytochrome | 0.668 | Periplasmic or extracellular |
| GSU3214 |  | *c*-type cytochrome | 0.581 | Not cytoplasmic |
| Transcriptional regulation | GSU0721 | *rpoE* | RNA polymerase sigma-24 factor, putative | 0.615 | Cytoplasmic |
| Membrane transport | GSU2651 |  | amino acid ABC transporter, ATP-binding protein | 0.703 | Inner membrane |
| GSU2981 |  | periplasmic energy transduction protein, TonB-related protein | 0.684 | Inner membrane |
| GSU3608 | *ybhF-N* | ABC transporter, ATP-binding protein | 0.614 | Inner membrane |

1Subcellular localization predicted by Psort v3.0.3 or UniProtKB database

2Annotation from this study

**Dataset S1.** (separate file)

**Processing of proteomics data for upregulated and downregulated genes.** DB and NB cultures with 15 mM acetate and 40 mM fumarate were grown to mid-exponential phase (OD600 0.4-0.6), and proteins were then extracted, sequenced, and analyzed as indicated in the Methods and Supplementary Methods. Data in each worksheet includes Protein Group, Protein IDs, Protein Names, log2fold-change (log2fc), *p*-value from Welch’s *t*-test (pval), Benjamini-Hochberg adjusted *p*-value (padj), number of NB or DB replicates with missing (NA) values (NB.NA and DB.NA, respectively), and relative abundance for each replicate (yellow highlighted boxes indicate imputed values). Separate worksheets are provided for all quantified proteins **(A)**, filtering for a *p* ≤ 0.05 **(B)**, and additional filtering for upregulated genes (log2FC ≥ 0.58) **(C)** or downregulated genes (log2FC ≤ 0.58) **(D)**.

**Dataset S2.** (separate file)

**Processing of RNA-Seq data for upregulated and downregulated genes.** DB and NB cultures with 15 mM acetate and 40 mM fumarate were grown to mid-exponential phase (OD600 0.4-0.6), RNA extracted, and sequenced and analyzed as indicated in the Methods. Data in each worksheet includes locus tag, gene name, log2fold-change (log2fc), *p*-value (pval), adjusted *p*-value (padj), and counts per million (CPM for each replicate). Separate worksheets are provided for all quantified genes **(A)**, filtering for a *p* ≤ 0.05 **(B)**, and additional filtering for upregulated genes (log2FC ≥ 0.58) **(C)** or downregulated genes (log2FC ≤ 0.58) **(D)**.
